# Supplementary material for: Regulation of Nodal signaling propagation by receptor interactions and positive feedback
Source: eLife. 2022 Sep 23;11:e66397. doi: 10.7554/eLife.66397 (PMC9612913; doi:10.7554/eLife.66397)
Supplement: Figure 1—source data 1. [file elife-66397-fig1-data1.xlsx]

## Sheet: Figure 1
	Figure 1E
		oep
		1	2	3
	Uninjected	0.959264	0.989657	1.05336
	squint-GFP	2.02792	2.08493	2.73208
	cyclops-GFP	2.33755	1.99308	2.28153
	lefty2-Dendra2	0.63728	0.400535	0.501736
	SB505124	0.779165	1.07923	1.44894
		acvr1b-a
		1	2	3	4	5	6	7	8	9	10	11	12
	Uninjected	1.26298	1.16675	0.954842	1.25411	0.800414	0.857079	0.778265	0.824543	1.34568	0.967053
	squint-GFP	3.42289	4.61874	1.01279	4.96456	3.27723	3.95177	0.791869	3.30962	3.35358	4.57097	1.38351	5.88347
	cyclops-GFP	3.44425	3.5247	1.38831	4.23296	2.06993	4.8652	1.25122	3.00355	1.63864	3.01397
	lefty2-Dendra2	1.00463	0.389132	0.435778	0.331788	0.599431
	SB505124	0.287839	0.202127	0.583714
		acvr1b-b
		1	2	3	4	5	6	7	8	9
	Uninjected	1.31039	1.52891	0.779165	0.76313	0.654062	1.22264	1.04972
	squint-GFP	1.10957	1.0479	0.432269	1.13682	0.950989	0.433769	1.23114	1.36841	0.632878
	cyclops-GFP	1.30134	1.66152	0.864537	0.939523	2.13243	0.993092	0.655197	0.796916
	lefty2-Dendra2	0.675955	0.959264
	SB505124	0.476319	0.82645	1.85318
		acvr2a-a
		1	2	3	4	5	6	7	8	9
	Uninjected	1.32869	1.40201	0.297645	0.752623	0.71326	1.13419	2.9622
	squint-GFP	0.752623	0.902814	0.163989	1.03886	0.89969	0.14576	1.00696	1.63297	0.284533
	cyclops-GFP	1.02101	1.10382	1.52802	0.505226	1.29909	1.09177	0.380245	0.525769
	lefty2-Dendra2	0.651423	0.710382
	SB505124	0.158402	0.166855	2.53444
		acvr2a-b
		1	2	3	4	5	6	7	8	9
	Uninjected	1.6906	1.40201	0.732889	0.59195	0.71326	1.66632	0.818847
	squint-GFP	0.515026	1.0299	0.440333	0.464123	0.772443	0.246843	0.364493	0.825019	0.429779
	cyclops-GFP	1.09388	0.970971	0.980552	0.342102	1.07301	0.477145
	lefty2-Dendra2	0.868541	1.53333
	SB505124	0.374144	0.471937	2.66044
		acvr2b-a
		1	2	3	4	5	6	7	8	9
	Uninjected	1.31532	1.38751	0.750019	0.783796	0.720715	1.27456	1.04608
	squint-GFP	0.979577	0.830758	0.433769	0.914276	0.937896	0.280292	1.06251	1.0479	0.666649
	cyclops-GFP	1.14483	1.01572	0.923382	0.53403	0.493972	0.817902	0.583377
	lefty2-Dendra2	1.18099	1.58557
	SB505124	0.501736	0.517632	1.99308
		acvr2b-b
		1	2	3	4	5	6	7	8	9
	Uninjected	1.52277	1.23756	0.638754	0.670519	0.808041	1.16743	1.34102
	squint-GFP	0.869043	0.780516	0.453236	0.954679	0.912249	0.371989	1.19644	0.896577	0.677519
	cyclops-GFP	1.25177	0.905948	1.00928	0.588714	0.54431	1.09303	0.589474
	lefty2-Dendra2	0.931956	1.10829
	SB505124	0.41851	0.610614	1.86391
