# Supplementary material for: Regulation of Nodal signaling propagation by receptor interactions and positive feedback
Source: eLife. 2022 Sep 23;11:e66397. doi: 10.7554/eLife.66397 (PMC9612913; doi:10.7554/eLife.66397)
Supplement: Figure 2—figure supplement 1—source data 1. [file elife-66397-fig2-figsupp1-data1.xlsx]

## Sheet: Figure 2 - figure supplement 1
	Figure 2 - figure supplement 1E
		acvr2a-b
		1	2	3
	Wild type	0.806723	1.10455	1.12225
	acvr2a-aSA34654	1.85414	1.37421	1.27693
	acvr2b-at08pm	2.90682	1.80826	2.30612
	Figure 2 - figure supplement 1F
		acvr2b-b
		1	2	3
	Wild type	0.9376	0.997691	1.06902
	acvr2a-aSA34654	1.52389	1.17212	1.19838
	acvr2b-at08pm	1.78663	1.10735	1.50875
	Figure 2 - figure supplement 1H
			Phenotype
	Condition	Morpholino (mg/ml)	Wild type	Smaller eyes	Medium tail	Small tail	Head necrosis	Smaller head + brain necrosis + tail malformed	Head + tail necrosis	No tail	No head + short tail	Dead
	Uninjected	0	65	0	0	1	0	0	0	0	0	3
	acvr2a-a MO-1	0.4	22	1	0	0	0	0	0	0	0	2
	acvr2a-a MO-1	2	0	9	0	3	0	0	0	3	1	5
	acvr2a-a MO-1	4	0	0	7	4	0	0	0	0	0	5
	acvr2a-a MO-2	0.4	15	0	0	0	0	0	1	0	0	1
	acvr2a-a MO-2	2	0	0	0	0	0	17	1	0	0	2
	acvr2a-a MO-2	4	0	0	0	0	0	12	1	0	0	2
	acvr2a-a MO-3	0.4	16	0	0	0	0	0	0	0	1	0
	acvr2a-a MO-3	2	8	3	0	0	0	0	0	0	0	1
	acvr2a-a MO-3	4	12	0	0	0	3	0	0	0	0	2
	acvr2a-a MO 1-3	3 x 0.13	10	1	0	0	0	1	0	0	0	6
	acvr2a-a MO 1-3	3 x 0.67	1	0	0	0	0	11	0	0	0	4
	acvr2a-a MO 1-3	3 x 1.33	0	0	0	0	0	11	0	0	0	6
	Figure 2 - figure supplement 1I
			Phenotype
	Condition	Morpholino (mg/ml)	Wild type	Smaller eyes	Smaller head	Head necrosis	Head necrosis + short tail	Smaller head + brain necrosis + tail malformation	Cyclopia + tail malformation	No head + short tail	No tail	Dead
	Uninjected	0	61	0	0	0	0	0	0	0	0	6
	acvr2a-b MO-1	0.4	12	0	0	0	0	0	0	1	0	3
	acvr2a-b MO-1	2	17	0	0	0	2	0	0	0	0	0
	acvr2a-b MO-1	4	0	0	0	0	13	0	0	2	0	2
	acvr2a-b MO-2	0.4	13	0	0	0	0	0	0	0	1	2
	acvr2a-b MO-2	2	15	0	0	0	0	0	0	0	0	2
	acvr2a-b MO-2	4	15	0	0	0	0	0	1	0	0	5
	acvr2a-b MO-3	0.4	16	0	0	0	0	0	1	0	0	1
	acvr2a-b MO-3	2	9	2	0	0	1	0	0	0	0	3
	acvr2a-b MO-3	4	9	0	0	1	1	0	0	0	0	4
	acvr2a-b MO 1-3	3 x 0.13	1	0	1	0	0	2	0	0	0	7
	acvr2a-b MO 1-3	3 x 1.33	0	0	0	0	0	0	0	0	0	15
	Figure 2 - figure supplement 1J
			Phenotype
	Condition	Morpholino (mg/ml)	Wild type	Delayed development	Tail malformation	Head necrosis	Small head + brain necrosis	Head necrosis + short tail	No head + enlarged somites	Dead
	Uninjected	0	53	2	0	0	0	0	0	7
	acvr2b-a MO-1	0.4	7	0	0	1	0	0	1	2
	acvr2b-a MO-1	2	9	0	0	2	0	0	0	3
	acvr2b-a MO-1	4	0	0	0	8	0	0	0	5
	acvr2b-a MO-2	0.4	9	0	0	0	0	1	0	4
	acvr2b-a MO-2	2	0	0	0	4	0	1	0	6
	acvr2b-a MO-2	4	0	0	0	2	0	3	0	4
	acvr2b-a MO-3	0.4	6	0	0	1	0	0	0	4
	acvr2b-a MO-3	2	1	2	0	0	0	0	0	2
	acvr2b-a MO-3	4	10	1	0	0	0	0	0	2
	acvr2b-a MO 1-3	3 x 0.13	9	0	1	0	0	0	0	1
	acvr2b-a MO 1-3	3 x 0.67	0	0	0	0	13	0	0	1
	acvr2b-a MO 1-3	3 x 1.33	0	0	0	11	0	0	0	4
	Figure 2 - figure supplement 1K
			Phenotype
	Condition	Morpholino (mg/ml)	Wild type	Delayed development	Smaller eyes	Head necrosis	Head necrosis + short tail	Dead
	Uninjected	0	15	1	0	0	0	2
	acvR2bb	0.4	12	0	0	0	0	2
	acvR2bb	2	4	0	6	0	6	1
	acvR2bb	4	0	0	0	10	4	5
	Figure 2 - figure supplement 1L
			Phenotype
	Condition	Morpholino (mg/ml)	Wild type	Head necrosis + smaller tail	Head + tail necrosis	Dead
	Uninjected	0	20	0	0	0
	Control MO	0.4	18	0	0	0
	Control MO	2	20	0	1	1
	Control MO	4	16	3	1	1
