# Supplementary material for: Regulation of Nodal signaling propagation by receptor interactions and positive feedback
Source: eLife. 2022 Sep 23;11:e66397. doi: 10.7554/eLife.66397 (PMC9612913; doi:10.7554/eLife.66397)
Supplement: Figure 2—figure supplement 2—source data 1. [file elife-66397-fig2-figsupp2-data1.xlsx]

## Sheet: Figure 2 - figure supplement 2
	Figure 2 - figure supplement 2B
				Phenotype
	Condition	Morpholino (mg/ml)	Number of embryos	Wild type (%)	Dead (%)	Mild dorsalization (%)	Moderate dorsalization (%)	Strong dorsalization (%)	Other (%)
	Uninjected	0	33	93.9394	6.06061	0	0	0	0
	acvr2a-a + acvr2a-b + acvr2b-a + acvr2b-b	2	10	0	10	60	20	10	0
	acvr2a-a + acvr2a-b + acvr2b-a + acvr2b-b	4	11	0	54.5455	0	0	45.4545	0
