# Supplementary material for: Regulation of Nodal signaling propagation by receptor interactions and positive feedback
Source: eLife. 2022 Sep 23;11:e66397. doi: 10.7554/eLife.66397 (PMC9612913; doi:10.7554/eLife.66397)
Supplement: Figure 2—source data 1. [file elife-66397-fig2-data1.xlsx]

## Sheet: Figure 2
	Figure 2B
			Phenotype							Details of phenotype "Other"
	Condition	Number of embryos	Wild type (%)	Dead (%)	Mild dorsalization (%)	Moderate dorsalization (%)	Strong dorsalization (%)	Other (%)		Tail malformation (%)	Yolk (%)	Small or no head (%)	Smaller head + head necrosis + tail malformation (%)
	Wild type	1098	97.2678	1.27505	0	0	0	1.45719		0.910747	0.182149	0.182149	0.182149
	acvr2a-a F0 KO	106	89.6226	3.77358	0	0	0	6.60377		4.71698	0.943396	0	0.943396
	acvr2a-b F0 KO	77	90.9091	5.19481	0	0	0	3.8961		0	2.5974	1.2987	0
	acvr2b-a F0 KO	90	93.3333	1.11111	0	0	0	5.55556		3.33333	2.22222	0	0
	acvr2b-b F0 KO	121	90.0826	2.47934	0	0	0	7.43802		2.47934	0.826446	0.826446	3.30579
	acvr2a-a F0 KO, acvr2a-b F0 KO	119	84.0336	5.04202	0	0	0	10.9244		10.084	0	0	0.840336
	acvr2b-a F0 KO, acvr2b-b F0 KO	127	3.14961	3.14961	68.5039	13.3858	3.93701	7.87402		3.93701	1.5748	0	2.3622
	acvr2a-a F0 KO, acvr2a-b F0 KO, acvr2b-a F0 KO	74	62.1622	9.45946	0	0	0	28.3784		21.6216	0	0	6.75676
	acvr2a-a F0 KO, acvr2a-b F0 KO, acvr2b-b F0 KO	93	33.3333	3.22581	0	0	0	63.4409		23.6559	15.0538	0	24.7312
	acvr2a-a F0 KO, acvr2b-a F0 KO, acvr2b-b F0 KO	83	0	2.40964	24.0964	51.8072	21.6867	0		0	0	0	0
	acvr2a-b F0 KO, acvr2b-a F0 KO, acvr2b-b F0 KO	83	0	3.61446	13.253	22.8916	57.8313	2.40964		0	2.40964	0	0
	acvr2a-a F0 KO, acvr2a-b F0 KO, acvr2b-a F0 KO, acvr2b-b F0 KO	218	0	1.37615	0	0	97.2477	1.37615		0	0.917431	0.458716	0
