# Supplementary material for: Regulation of Nodal signaling propagation by receptor interactions and positive feedback
Source: eLife. 2022 Sep 23;11:e66397. doi: 10.7554/eLife.66397 (PMC9612913; doi:10.7554/eLife.66397)
Supplement: Figure 3—figure supplement 1—source data 1. [file elife-66397-fig3-figsupp1-data1.xlsx]

## Sheet: Figure 3 - figure supplement 1
	Figure 3 - figure supplement 1D
		acvr1b-b
		1	2	3
	Wild type	1.00241	0.967833	1.03075
	acvr1b-at03pm	0.946401	1.10706	1.39662
	Figure 3 - figure supplement 1F
			Phenotype
	Condition	Morpholino (mg/ml)	Wild type	Smaller eyes	Bent tail	Bent tail + smaller head	Tail malformation	Head necrosis	Head necrosis + short tail	No head	No head + no tail	Dead
	Uninjected	0	61	1	1	2	0	0	0	1	0	10
	acvr1b-a MO-1	0.4	8	3	0	0	0	0	1	0	1	5
	acvr1b-a MO-1	2	5	0	0	0	0	0	4	0	0	10
	acvr1b-a MO-1	4	4	0	0	0	4	3	0	0	2	8
	acvr1b-a MO-2	0.4	22	0	0	0	0	2	0	0	0	1
	acvr1b-a MO-2	2	21	0	0	0	0	0	1	0	0	3
	acvr1b-a MO-2	4	5	0	0	0	0	8	3	0	0	3
	acvr1b-a MO-3	0.4	20	0	0	4	0	0	1	0	0	2
	acvr1b-a MO-3	2	20	0	0	0	0	0	3	0	0	3
	acvr1b-a MO-3	4	14	0	0	0	0	0	0	0	0	3
	acvr1b-a MO 1-3	3 x 0.13	24	0	0	0	0	0	0	0	0	0
	acvr1b-a MO 1-3	3 x 0.67	19	0	0	0	1	0	0	0	0	1
	acvr1b-a MO 1-3	3 x 1.33	21	0	0	0	0	0	0	1	0	0
	Figure 3 - figure supplement 1G
			Phenotype
	Condition	Morpholino (mg/ml)	Wild type	Smaller head	Brain necrosis	Smaller eyes + tail malformation	No tail + heart edema	No head	Dead
	Uninjected	0	45	0	0	0	0	1	2
	acvr1b-b MO-1	0.4	18	0	0	0	1	0	2
	acvr1b-b MO-1	2	20	0	0	0	0	0	1
	acvr1b-b MO-1	4	23	0	0	0	0	0	1
	acvr1b-b MO-2	0.4	20	0	0	0	0	0	3
	acvr1b-b MO-2	2	21	0	0	0	0	0	2
	acvr1b-b MO-2	4	17	2	0	0	0	0	3
	acvr1b-b MO 1+2	2 x 0.2	18	0	0	1	0	0	3
	acvr1b-b MO 1+2	2 x 1	21	1	0	3	0	0	0
	acvr1b-b MO 1+2	2 x 2	20	0	1	0	0	0	0
	Figure 2 - figure supplement 1H
			Phenotype
	Condition	Morpholino (mg/ml)	Wild type	Cyclopia	Tail malformation	Smaller eye + tail	No mid-hindbrain boundary	Head necrosis	Head necrosis + tail malformation	No tail	No head + short tail	Dead
	Uninjected	0	59	0	0	0	0	1	0	0	0	1
	acvr1c MO-1	0.4	15	0	0	1	0	1	0	0	1	1
	acvr1c MO-1	2	12	0	2	0	0	0	1	0	0	4
	acvr1c MO-1	4	6	0	0	0	0	0	0	0	0	2
	acvr1c MO-2	0.4	11	0	0	0	2	0	1	1	0	0
	acvr1c MO-2	2	13	0	0	0	0	0	0	0	1	0
	acvr1c MO-2	4	16	0	0	0	0	0	0	1	0	2
	acvr1c MO-3	0.4	4	0	0	0	0	0	0	0	0	1
	acvr1c MO-3	2	8	1	0	0	0	0	0	0	0	1
	acvr1c MO-3	4	5	0	0	0	0	0	0	0	0	1
	acvr1c MO 1-3	3 x 0.13	19	0	0	0	0	0	0	0	0	0
	acvr1c MO 1-3	3 x 0.67	17	0	0	0	0	0	0	0	0	0
	acvr1c MO 1-3	3 x 1.33	19	0	0	0	0	0	0	0	0	1
