# Supplementary material for: Regulation of Nodal signaling propagation by receptor interactions and positive feedback
Source: eLife. 2022 Sep 23;11:e66397. doi: 10.7554/eLife.66397 (PMC9612913; doi:10.7554/eLife.66397)
Supplement: Figure 3—source data 1. [file elife-66397-fig3-data1.xlsx]

## Sheet: Figure 3
	Figure 3C
			Phenotype
	Condition	Number of embryos	Nodal LOF (%)	Cyclopia (%)	Fused eyes (%)	Convergent Eyes (%)	Small or no head (%)	Wild type (%)	Dead (%)	Other (%)
	Wild type	474	0	0	0	0	0.238095	96.8186	2.18678	0.756543
	acvr1b-a-/-	206	0	0	0	0	0	94.182	4.97415	0.843882
	acvr1b-b MO-1	37	0	0	0	0	0	94.5946	2.7027	2.7027
	MZoep	118	100	0	0	0	0	0	0	0
	acvr1b-a-/- + acvr1b-b MO-1	82	99.1803	0	0	0	0	0	0.819672	0
	acvr1b-a F0 KO	79	0	0	0	0	0	94.9367	0	5.06329
	acvr1b-b F0 KO	54	0	0	0	3.7037	0	90.7407	3.7037	1.85185
	oep F0 KO	156	0	14.5833	46.875	23.6111	13.0787	0	0.925926	0.925926
	acvr1b-a-/-, acvr1b-b F0 KO	139	0	2.08333	13.92	71.0821	0	7.20357	5.01658	0.694444
	acvr1b-a F0 KO, acvr1b-b F0 KO	230	0	6.68382	19.801	55.5646	0	7.64904	2.27369	8.02775
