# Supplementary material for: Regulation of Nodal signaling propagation by receptor interactions and positive feedback
Source: eLife. 2022 Sep 23;11:e66397. doi: 10.7554/eLife.66397 (PMC9612913; doi:10.7554/eLife.66397)
Supplement: Figure 4—figure supplement 1—source data 1. [file elife-66397-fig4-figsupp1-data1.xlsx]

## Sheet: WT lateral
	Figure 4 - figure supplement 1
	WT, lateral view
		Background-subtracted and normalized intensity in wild-type embryos, lateral view
	Distance (µm)	Embryo
		1	2	3	4	5	6	7
	0	0.446209	0.983492	1.1088	0.800874	1.37777	0.713262	1.5696
	0.534938	0.462003	0.987775	1.13908	0.78766	1.303	0.681239	1.63297
	1.06988	0.499475	1.00004	1.13105	0.776567	1.26684	0.676508	1.63802
	1.60481	0.323271	1.02765	1.12978	0.752845	1.21413	0.694859	1.69492
	2.13975	0.369074	1.06361	1.07966	0.737002	1.15607	0.654745	1.62213
	2.67469	0.388232	1.06139	1.01471	0.706527	1.14258	0.655077	1.62115
	3.20963	0.396496	1.07225	0.974471	0.699498	1.12055	0.605573	1.58136
	3.74457	0.425429	1.09078	0.952385	0.700963	1.12414	0.578007	1.54691
	4.27951	0.448336	1.10208	0.917799	0.69357	1.11389	0.537847	1.49833
	4.81444	0.452496	1.09882	0.873348	0.694451	1.07192	0.499766	1.45178
	5.34938	0.434476	1.07422	0.849107	0.687169	1.0243	0.471651	1.42602
	5.88432	0.424317	1.04155	0.83799	0.708169	0.97635	0.482035	1.4103
	6.41926	0.423874	1.0148	0.803619	0.714315	0.908404	0.508302	1.41607
	6.9542	0.420861	0.999195	0.750444	0.705767	0.866604	0.526423	1.41126
	7.48913	0.405006	0.950199	0.683541	0.683978	0.853981	0.526845	1.40974
	8.02407	0.375663	0.916143	0.632552	0.659405	0.853468	0.535251	1.40421
	8.55901	0.351995	0.877089	0.597678	0.655702	0.856567	0.53539	1.37662
	9.09395	0.342573	0.844323	0.566194	0.660123	0.881786	0.514784	1.39014
	9.62889	0.336665	0.826526	0.546283	0.689573	0.882728	0.514527	1.40402
	10.1638	0.325692	0.791623	0.501075	0.690196	0.857045	0.508296	1.39869
	10.6988	0.310355	0.763273	0.457212	0.690418	0.829924	0.514109	1.36777
	11.2337	0.298884	0.757134	0.425794	0.709164	0.782405	0.538994	1.34372
	11.7686	0.275307	0.77346	0.403024	0.726994	0.747496	0.550956	1.31067
	12.3036	0.244487	0.777737	0.387249	0.728555	0.715028	0.556535	1.30797
	12.8385	0.202622	0.791113	0.380168	0.731761	0.670348	0.543991	1.30015
	13.3735	0.166621	0.796029	0.37934	0.726398	0.653239	0.526209	1.2942
	13.9084	0.137972	0.790715	0.37786	0.726359	0.656331	0.501091	1.28164
	14.4433	0.131896	0.795346	0.377801	0.745144	0.695591	0.477458	1.23232
	14.9783	0.128329	0.794633	0.386767	0.728213	0.742786	0.464604	1.12723
	15.5132	0.113886	0.792518	0.387135	0.72404	0.799604	0.492568	1.06175
	16.0481	0.104851	0.795753	0.381314	0.68725	0.830916	0.480145	1.03415
	16.5831	0.116395	0.788902	0.384719	0.653377	0.849932	0.468563	1.02613
	17.118	0.1248	0.777588	0.381995	0.622722	0.856929	0.459331	0.996842
	17.653	0.136906	0.761871	0.380316	0.625335	0.851781	0.436698	0.986304
	18.1879	0.150696	0.741965	0.377563	0.614661	0.99747	0.444887	0.971932
	18.7228	0.166147	0.730566	0.36258	0.583514	1.02569	0.439988	0.97658
	19.2578	0.182758	0.729398	0.350514	0.540264	0.976423	0.424342	0.967824
	19.7927	0.187654	0.727558	0.34876	0.50948	0.992792	0.421786	1.00024
	20.3276	0.191733	0.72151	0.343499	0.500427	1.08396	0.401338	1.05065
	20.8626	0.196062	0.710531	0.329852	0.512616	1.08861	0.358532	1.05965
	21.3975	0.206917	0.715698	0.318644	0.541526	1.01015	0.332117	1.08121
	21.9325	0.212909	0.717102	0.316758	0.560782	1.02251	0.311727	1.06454
	22.4674	0.214881	0.718604	0.321412	0.572315	1.0228	0.309129	1.04641
	23.0023	0.221284	0.718953	0.317189	0.563689	0.998087	0.304618	1.05673
	23.5373	0.231886	0.737769	0.304268	0.555559	1.01287	0.303628	1.06587
	24.0722	0.229736	0.756725	0.303315	0.555835	1.02731	0.300031	1.03912
	24.6072	0.243473	0.758068	0.313296	0.558605	0.957926	0.295774	1.01657
	25.1421	0.227227	0.770374	0.333138	0.57549	0.897255	0.292222	0.998529
	25.677	0.215909	0.792346	0.339571	0.5986	0.851867	0.286442	1.01385
	26.212	0.211783	0.810099	0.337669	0.623137	0.851312	0.269249	1.03726
	26.7469	0.206028	0.813633	0.333602	0.639892	0.866844	0.265605	1.08325
	27.2818	0.206259	0.812049	0.320257	0.647658	0.874856	0.264229	1.12017
	27.8168	0.209968	0.824417	0.316195	0.686904	0.876259	0.276785	1.15215
	28.3517	0.222315	0.816233	0.311946	0.70988	0.878732	0.281123	1.17745
	28.8867	0.223091	0.81875	0.32711	0.722113	0.874974	0.301071	1.18371
	29.4216	0.204643	0.811153	0.333181	0.71516	0.848215	0.306673	1.18869
	29.9565	0.183827	0.799451	0.342767	0.706591	0.79224	0.310658	1.17813
	30.4915	0.175117	0.800951	0.335898	0.699353	0.766052	0.306638	1.15944
	31.0264	0.17749	0.812541	0.328936	0.70185	0.725386	0.294926	1.13883
	31.5614	0.180886	0.809797	0.32292	0.709958	0.70074	0.295062	1.11392
	32.0963	0.17892	0.805005	0.316765	0.730117	0.687646	0.285753	1.0865
	32.6312	0.17586	0.806017	0.308203	0.754542	0.686119	0.287028	1.06025
	33.1662	0.174798	0.792832	0.296218	0.78295	0.692191	0.295638	1.04358
	33.7011	0.166374	0.777705	0.297227	0.786317	0.696165	0.315938	1.00271
	34.236	0.159336	0.771645	0.297576	0.764663	0.711328	0.309058	0.982073
	34.771	0.147982	0.753085	0.296053	0.746577	0.749087	0.301246	0.982992
	35.3059	0.150209	0.730962	0.29454	0.720133	0.781134	0.300448	0.989422
	35.8409	0.151225	0.690314	0.29323	0.686637	0.792629	0.299505	0.991745
	36.3758	0.16116	0.666303	0.288667	0.637254	0.804478	0.297598	0.985731
	36.9107	0.15869	0.658108	0.280022	0.595802	0.832329	0.302744	0.989153
	37.4457	0.148277	0.652128	0.266651	0.579801	0.894904	0.301384	0.983407
	37.9806	0.138289	0.640538	0.251018	0.57238	0.985672	0.293498	0.97511
	38.5155	0.13795	0.646979	0.240541	0.547135	1.03077	0.288501	0.972679
	39.0505	0.13624	0.648239	0.22545	0.534646	1.01868	0.283056	0.969722
	39.5854	0.139205	0.640137	0.227225	0.531317	1.01536	0.285029	0.96713
	40.1204	0.136462	0.623852	0.232823	0.534849	1.04717	0.287732	0.944684
	40.6553	0.128398	0.605869	0.237573	0.540011	1.02885	0.272973	0.911736
	41.1902	0.127224	0.566411	0.231565	0.545655	1.04417	0.253534	0.89628
	41.7252	0.127744	0.541137	0.219418	0.546306	1.04926	0.237836	0.887901
	42.2601	0.130672	0.515712	0.207082	0.522898	1.02636	0.212876	0.88849
	42.7951	0.135522	0.500473	0.198617	0.508538	1.0145	0.19699	0.889312
	43.33	0.143492	0.477686	0.190269	0.482544	0.996672	0.20564	0.867944
	43.8649	0.140949	0.457943	0.190496	0.437846	0.947909	0.219532	0.83544
	44.3999	0.135048	0.443501	0.190878	0.412548	0.921891	0.235658	0.821258
	44.9348	0.131664	0.441112	0.189826	0.391073	0.898538	0.253103	0.820685
	45.4697	0.137949	0.443535	0.193548	0.391542	0.884845	0.278648	0.846327
	46.0047	0.14591	0.443358	0.198431	0.385212	0.830085	0.298251	0.869103
	46.5396	0.150612	0.444959	0.200405	0.391859	0.784408	0.312008	0.88024
	47.0746	0.144788	0.437414	0.202124	0.398864	0.792348	0.314411	0.874347
	47.6095	0.137771	0.429186	0.20589	0.408537	0.787799	0.318841	0.868487
	48.1444	0.128407	0.419939	0.205279	0.420761	0.769063	0.327283	0.863195
	48.6794	0.122742	0.410668	0.202271	0.432727	0.756378	0.332763	0.866212
	49.2143	0.120797	0.399012	0.192329	0.44568	0.758563	0.329107	0.881204
	49.7492	0.117767	0.380305	0.189206	0.463056	0.70403	0.326212	0.890378
	50.2842	0.11459	0.364428	0.174856	0.473718	0.68477	0.327766	0.881489
	50.8191	0.121666	0.352077	0.164554	0.492472	0.663992	0.345643	0.876261
	51.3541	0.13112	0.352348	0.158962	0.52279	0.655311	0.367135	0.869468
	51.889	0.131765	0.359846	0.153853	0.546414	0.645585	0.372147	0.857144
	52.4239	0.12978	0.367975	0.146099	0.554252	0.619526	0.370742	0.831298
	52.9589	0.12693	0.355866	0.139608	0.56495	0.624416	0.366621	0.799787
	53.4938	0.129334	0.348867	0.129957	0.570876	0.600332	0.360606	0.779981
	54.0288	0.132829	0.333313	0.12979	0.565095	0.5714	0.34731	0.763983
	54.5637	0.139982	0.326944	0.118159	0.531504	0.572453	0.327906	0.738999
	55.0986	0.149012	0.328526	0.107053	0.476417	0.593095	0.305234	0.725632
	55.6336	0.163753	0.340153	0.106693	0.429755	0.61433	0.288981	0.709483
	56.1685	0.178469	0.349586	0.110688	0.408484	0.63587	0.285494	0.684599
	56.7034	0.176422	0.360959	0.117185	0.384723	0.635588	0.285077	0.676633
	57.2384	0.167711	0.364134	0.127284	0.358804	0.639168	0.301041	0.660288
	57.7733	0.165213	0.368642	0.136429	0.354092	0.646465	0.313553	0.639017
	58.3083	0.162794	0.374599	0.139056	0.360146	0.647058	0.328803	0.616508
	58.8432	0.169076	0.39227	0.143151	0.36752	0.650459	0.335848	0.59422
	59.3781	0.171884	0.422049	0.148498	0.371654	0.647288	0.34347	0.57849
	59.9131	0.164726	0.419321	0.14924	0.382133	0.653759	0.358975	0.569952
	60.448	0.15214	0.431237	0.147078	0.392463	0.661748	0.374296	0.565486
	60.9829	0.1368	0.444365	0.145954	0.394051	0.647877	0.387612	0.569495
	61.5179	0.129296	0.433352	0.141178	0.380555	0.622496	0.402319	0.576788
	62.0528	0.125265	0.425343	0.140754	0.347372	0.596595	0.403973	0.581816
	62.5878	0.11883	0.403663	0.145268	0.332202	0.567186	0.404989	0.575296
	63.1227	0.115387	0.392239	0.150999	0.333946	0.542412	0.396928	0.573344
	63.6576	0.115735	0.380691	0.152474	0.33795	0.529893	0.383672	0.570477
	64.1926	0.113757	0.358861	0.151201	0.333739	0.516255	0.372542	0.569243
	64.7275	0.113812	0.332591	0.147125	0.35012	0.507662	0.369309	0.568898
	65.2625	0.114471	0.322484	0.156349	0.365207	0.503447	0.362395	0.561234
	65.7974	0.117644	0.316159	0.165041	0.36333	0.505479	0.345221	0.554183
	66.3323	0.117846	0.308595	0.166575	0.363366	0.495235	0.329147	0.538702
	66.8673	0.122123	0.301333	0.169452	0.378226	0.498982	0.320933	0.527319
	67.4022	0.123798	0.287232	0.172072	0.389218	0.520276	0.313088	0.518287
	67.9371	0.11946	0.268399	0.17447	0.411657	0.538345	0.293507	0.523886
	68.4721	0.115525	0.258075	0.169938	0.433064	0.546492	0.275262	0.5201
	69.007	0.11246	0.254495	0.16363	0.443245	0.560321	0.263785	0.511486
	69.542	0.107458	0.248707	0.163751	0.45256	0.569731	0.259153	0.49928
	70.0769	0.110336	0.248191	0.161885	0.449713	0.570162	0.265832	0.507765
	70.6118	0.11129	0.250335	0.156437	0.431455	0.545665	0.268161	0.494994
	71.1468	0.107351	0.243726	0.145944	0.414318	0.545917	0.262685	0.486663
	71.6817	0.101735	0.240529	0.137674	0.400349	0.551529	0.259427	0.487323
	72.2167	0.0956572	0.236332	0.132066	0.387889	0.536276	0.252197	0.492705
	72.7516	0.099354	0.232692	0.128279	0.377224	0.530238	0.242521	0.472399
	73.2865	0.101333	0.236155	0.128288	0.363222	0.52116	0.228565	0.458522
	73.8215	0.10042	0.240846	0.128858	0.35427	0.508738	0.220413	0.455871
	74.3564	0.100822	0.243028	0.12581	0.354711	0.49462	0.212253	0.443606
	74.8913	0.100908	0.244141	0.121016	0.362311	0.485086	0.205698	0.421981
	75.4263	0.0992735	0.243162	0.120906	0.366878	0.470182	0.206293	0.411835
	75.9612	0.0986257	0.236272	0.121206	0.379083	0.444094	0.203788	0.390271
	76.4962	0.0977696	0.22964	0.118806	0.390168	0.417652	0.210492	0.38018
	77.0311	0.0968913	0.22802	0.118876	0.409917	0.387826	0.219015	0.376533
	77.566	0.0985456	0.233203	0.116991	0.421696	0.378284	0.216986	0.379381
	78.101	0.101016	0.233725	0.119304	0.427259	0.374218	0.216994	0.375744
	78.6359	0.0980978	0.23731	0.122345	0.429739	0.356178	0.223211	0.37052
	79.1708	0.0990797	0.24128	0.123357	0.422372	0.318052	0.235489	0.360728
	79.7058	0.102901	0.2382	0.121815	0.411459	0.306236	0.252532	0.359904
	80.2407	0.102973	0.226705	0.110258	0.407047	0.314208	0.266946	0.374707
	80.7757	0.104868	0.217732	0.100349	0.417718	0.322866	0.270461	0.384859
	81.3106	0.107487	0.20829	0.0992037	0.434352	0.327999	0.268703	0.395847
	81.8455	0.110821	0.205165	0.0983621	0.445095	0.332389	0.268132	0.398783
	82.3805	0.11137	0.201601	0.0941996	0.443692	0.334147	0.266175	0.387789
	82.9154	0.104307	0.202028	0.0905471	0.452271	0.332733	0.257664	0.376623
	83.4504	0.103016	0.200957	0.0933489	0.456303	0.334553	0.244354	0.373247
	83.9853	0.105186	0.205724	0.0966257	0.456272	0.335996	0.24104	0.377348
	84.5202	0.101726	0.202222	0.0980403	0.45356	0.342843	0.241996	0.376996
	85.0552	0.100141	0.196135	0.101866	0.425564	0.347597	0.235739	0.372275
	85.5901	0.100687	0.190576	0.0986998	0.399453	0.355478	0.218506	0.366519
	86.125	0.0979545	0.185555	0.0945312	0.372023	0.361292	0.205292	0.366353
	86.66	0.0984255	0.180824	0.0907269	0.340903	0.358927	0.21409	0.354428
	87.1949	0.0994105	0.176772	0.0906625	0.312838	0.357692	0.209985	0.339271
	87.7299	0.100991	0.177648	0.0889045	0.303179	0.355539	0.208992	0.327428
	88.2648	0.10538	0.175401	0.0851862	0.298591	0.359805	0.21592	0.31298
	88.7997	0.110078	0.170444	0.0831328	0.301272	0.353316	0.230661	0.30229
	89.3347	0.110279	0.166508	0.0869094	0.318057	0.346139	0.241131	0.301992
	89.8696	0.108607	0.163946	0.0918564	0.327961	0.336976	0.234314	0.302015
	90.4045	0.105934	0.163446	0.0966735	0.327135	0.331869	0.240255	0.313878
	90.9395	0.104351	0.156132	0.101466	0.324149	0.323056	0.243557	0.322896
	91.4744	0.101859	0.148592	0.109245	0.3312	0.309034	0.253026	0.323463
	92.0094	0.104892	0.14812	0.112787	0.340268	0.290816	0.258171	0.317942
	92.5443	0.11008	0.15033	0.119947	0.338189	0.273037	0.258511	0.314807
	93.0792	0.107326	0.152062	0.117782	0.328472	0.252526	0.262412	0.318072
	93.6142	0.102364	0.15277	0.112139	0.317246	0.244873	0.26701	0.31548
	94.1491	0.0991964	0.155671	0.114424	0.309113	0.236335	0.271125	0.313721
	94.6841	0.101589	0.159398	0.116092	0.312418	0.231116	0.271067	0.311749
	95.219	0.106725	0.165989	0.108882	0.325067	0.226421	0.267336	0.31176
	95.7539	0.109935	0.167768	0.0996719	0.333392	0.220562	0.266964	0.300731
	96.2889	0.10478	0.164838	0.097995	0.328988	0.227991	0.263609	0.293424
	96.8238	0.104105	0.165192	0.0973791	0.321961	0.2312	0.251711	0.293908
	97.3587	0.100057	0.164361	0.102853	0.313542	0.238887	0.234427	0.293602
	97.8937	0.0989425	0.160868	0.112476	0.308895	0.244396	0.22006	0.300313
	98.4286	0.103564	0.15725	0.119417	0.291992	0.250364	0.205926	0.306546
	98.9636	0.105728	0.155749	0.125769	0.269908	0.253913	0.188964	0.307675
	99.4985	0.102618	0.145163	0.137689	0.259959	0.253434	0.173487	0.301297
	100.033	0.104546	0.135438	0.140511	0.257241	0.25428	0.156309	0.2949
	100.568	0.101682	0.12727	0.135062	0.269027	0.251834	0.146231	0.288383
	101.103	0.100131	0.123283	0.129903	0.276358	0.247943	0.129643	0.283894
	101.638	0.10754	0.1221	0.128932	0.277321	0.236839	0.115719	0.278261
	102.173	0.117752	0.122445	0.124235	0.271553	0.228365	0.101893	0.26621
	102.708	0.125097	0.11893	0.115946	0.269741	0.235555	0.0923278	0.253433
	103.243	0.125006	0.121053	0.111591	0.274608	0.236698	0.0785477	0.238542
	103.778	0.121796	0.123183	0.106345	0.274831	0.226463	0.065792	0.231928
	104.313	0.120132	0.122901	0.095795	0.273097	0.226651	0.0545789	0.223784
	104.848	0.119764	0.122967	0.0913562	0.269562	0.231789	0.0541191	0.216551
	105.383	0.112243	0.126363	0.0912784	0.269307	0.239693	0.0598299	0.21312
	105.918	0.105852	0.13013	0.0973074	0.265835	0.239391	0.0650758	0.19852
	106.453	0.092121	0.129398	0.10088	0.263849	0.237481	0.0619335	0.186421
	106.988	0.0766472	0.12622	0.0985351	0.253216	0.230339	0.0596939	0.194251
	107.523	0.0722135	0.121837	0.0965612	0.235944	0.218585	0.0648974	0.195101
	108.058	0.072044	0.118847	0.0971592	0.218717	0.215656	0.0779639	0.199332
	108.592	0.0801228	0.115813	0.0973088	0.207892	0.210491	0.0894585	0.207379
	109.127	0.0872145	0.11466	0.0967279	0.208408	0.214969	0.095704	0.213553
	109.662	0.0910335	0.112411	0.0998003	0.208666	0.21605	0.10576	0.217865
	110.197	0.0890776	0.10981	0.100705	0.205846	0.209856	0.119646	0.214339
	110.732	0.0903726	0.107524	0.0998781	0.19705	0.205915	0.12606	0.209058
	111.267	0.0868385	0.105937	0.10001	0.198017	0.20295	0.130323	0.208026
	111.802	0.0812997	0.103447	0.100133	0.201329	0.210076	0.132574	0.211817
	112.337	0.075913	0.099124	0.100483	0.213865	0.21388	0.133106	0.22069
	112.872	0.0755328	0.0945966	0.101658	0.213991	0.211037	0.137053	0.230046
	113.407	0.0743992	0.093035	0.0988695	0.210187	0.197951	0.135219	0.228988
	113.942	0.0695725	0.0953195	0.0916012	0.216021	0.190255	0.129066	0.223589
	114.477	0.0619841	0.0996707	0.0844379	0.220166	0.190413	0.125494	0.217673
	115.012	0.0578036	0.0991927	0.0744965	0.215614	0.194487	0.124077	0.206633
	115.547	0.0560094	0.0990372	0.0678486	0.210091	0.197021	0.11775	0.192577
	116.082	0.0563193	0.104366	0.0652415	0.210847	0.196965	0.111321	0.178452
	116.617	0.0537173	0.10999	0.0610633	0.214906	0.190726	0.102389	0.167889
	117.151	0.0527551	0.113098	0.0538003	0.222565	0.183423	0.095707	0.159512
	117.686	0.048299	0.113622	0.0498695	0.235984	0.174559	0.0902465	0.145623
	118.221	0.0478036	0.115825	0.0511856	0.251458	0.170593	0.0833892	0.140172
	118.756	0.0488008	0.119911	0.0543423	0.255441	0.16654	0.0820535	0.152626
	119.291	0.0499506	0.121363	0.057495	0.255997	0.163577	0.0886139	0.158837
	119.826	0.0528892	0.111442	0.0580922	0.253943	0.155307	0.0944348	0.168478
	120.361	0.058183	0.0986457	0.0597471	0.248456	0.146442	0.0932581	0.170844
	120.896	0.0652051	0.0916187	0.0599109	0.243779	0.148969	0.0984876	0.166798
	121.431	0.0664115	0.0912381	0.0556003	0.238537	0.154838	0.109185	0.155235
	121.966	0.0671552	0.0898179	0.0536568	0.230413	0.158224	0.121407	0.143862
	122.501	0.0680319	0.0884607	0.0527493	0.219915	0.167141	0.127621	0.141638
	123.036	0.0684587	0.0872455	0.052226	0.213062	0.180687	0.128032	0.148524
	123.571	0.0670143	0.0880784	0.0563121	0.209905	0.185545	0.125894	0.157001
	124.106	0.0662441	0.0908234	0.0611501	0.217252	0.184576	0.127725	0.157926
	124.641	0.0605913	0.0921165	0.0635728	0.222356	0.189404	0.128626	0.160612
	125.176	0.0562347	0.0930765	0.0560913	0.232507	0.196819	0.12644	0.156782
	125.71	0.0539439	0.0883593	0.0522405	0.236645	0.199796	0.125932	0.159488
	126.245	0.0489555	0.0838468	0.0511881	0.24305	0.198018	0.123479	0.165444
	126.78	0.045498	0.0801264	0.055023	0.250004	0.188663	0.122271	0.168539
	127.315	0.0385447	0.0762639	0.0625831	0.256204	0.182756	0.121399	0.167308
	127.85	0.0306449	0.0786751	0.0672717	0.256635	0.182578	0.113971	0.178586
	128.385	0.0262737	0.0789427	0.0718039	0.254496	0.191659	0.103887	0.175598
	128.92	0.02301	0.081034	0.0735089	0.264312	0.198968	0.0889127	0.175147
	129.455	0.0312358	0.0802498	0.0729648	0.267835	0.200555	0.0703397	0.176377
	129.99	0.0365177	0.0833339	0.0705428	0.263264	0.19384	0.0509449	0.170459
	130.525	0.0410286	0.0882962	0.0704781	0.262653	0.187767	0.0409357	0.164754
	131.06	0.0487502	0.0885053	0.0674661	0.253385	0.174009	0.0349319	0.165161
	131.595	0.0524269	0.0843335	0.0665576	0.234922	0.16898	0.0323183	0.169461
	132.13	0.051835	0.0827256	0.0682094	0.229113	0.164813	0.0322451	0.168807
	132.665	0.0497883	0.0811537	0.0759817	0.232252	0.159098	0.0348782	0.163153
	133.2	0.050205	0.0800625	0.0767912	0.237437	0.155575	0.0380251	0.155533
	133.735	0.0508437	0.080058	0.0734641	0.233707	0.152971	0.0375792	0.152876
	134.269	0.0484401	0.0851645	0.0720755	0.230791	0.146422	0.037328	0.153385
	134.804	0.0435739	0.088581	0.0715277	0.230533	0.139512	0.0368045	0.143266
	135.339	0.0449713	0.0891493	0.0698893	0.221819	0.139692	0.0313652	0.139674
	135.874	0.0446014	0.0889355	0.0688241	0.202748	0.136308	0.0310737	0.141577
	136.409	0.0416848	0.0886971	0.0704658	0.183479	0.139209	0.0322538	0.133397
	136.944	0.0380569	0.0924468	0.0723178	0.184892	0.142595	0.0329574	0.119906
	137.479	0.0411974	0.0900052	0.0728605	0.192377	0.143122	0.0345727	0.112889
	138.014	0.0432584	0.0883694	0.0729608	0.205465	0.14577	0.0329343	0.106524
	138.549	0.0412522	0.0838597	0.0731393	0.209037	0.145636	0.0327638	0.101349
	139.084	0.0341071	0.0796668	0.0720477	0.215855	0.14934	0.0349923	0.109734
	139.619	0.0282629	0.0776559	0.0705497	0.214035	0.147451	0.0340693	0.118817
	140.154	0.0299252	0.0748188	0.0700549	0.200786	0.141745	0.0326177	0.125408
	140.689	0.0317175	0.074317	0.0711112	0.187534	0.142593	0.0372958	0.12727
	141.224	0.0298539	0.0781533	0.0725794	0.181756	0.145398	0.0437285	0.11872
	141.759	0.0296827	0.0806373	0.0752506	0.18318	0.147064	0.0439047	0.119526
	142.294	0.0285465	0.0804391	0.072783	0.194992	0.146635	0.0434587	0.117684
	142.828	0.0274899	0.0785166	0.06857	0.208398	0.145675	0.0371648	0.109692
	143.363	0.0302356	0.0799706	0.0651868	0.220144	0.140302	0.0289454	0.098478
	143.898	0.0316804	0.077019	0.063204	0.220776	0.138471	0.0261017	0.0918135
	144.433	0.0279047	0.07361	0.0578623	0.22624	0.139762	0.0286949	0.078474
	144.968	0.023246	0.0664795	0.0551554	0.228376	0.144541	0.0280988	0.0793429
	145.503	0.0192565	0.0600124	0.0559607	0.229733	0.155316	0.0284976	0.0897389
	146.038	0.0197319	0.0602523	0.0535459	0.22529	0.165685	0.035057	0.0972188
	146.573	0.0224451	0.0642677	0.0534249	0.22265	0.172799	0.0363113	0.102087
	147.108	0.0206477	0.0729886	0.0561961	0.220106	0.170311	0.0324064	0.101282
	147.643	0.0174766	0.0778434	0.0543054	0.22625	0.167897	0.0328203	0.0966399
	148.178	0.0146073	0.0811155	0.0538851	0.234951	0.162159	0.0318383	0.0936615
	148.713	0.0148846	0.0801874	0.0506695	0.231629	0.16062	0.0267679	0.0905517
	149.248	0.0124602	0.0816384	0.0491543	0.216275	0.16747	0.0197288	0.0877348
	149.783	0.0152964	0.0880236	0.0500175	0.196638	0.169571	0.0219632	0.0851538
	150.318	0.0200294	0.0919527	0.0527644	0.191041	0.160018	0.0272314	0.0825326
	150.853	0.0244187	0.0965509	0.0578893	0.190479	0.146889	0.0305068	0.0842349
	151.387	0.0225737	0.103698	0.0676283	0.191514	0.133676	0.0342646	0.0860151
	151.922	0.0268545	0.108153	0.070727	0.191253	0.119095	0.0377668	0.083161
	152.457	0.0303568	0.110069	0.0723206	0.18697	0.111093	0.0432201	0.0749358
	152.992	0.0292241	0.111002	0.0762682	0.181746	0.109555	0.0454124	0.0805398
	153.527	0.0243895	0.114414	0.0791756	0.175448	0.108197	0.0417072	0.0970587
	154.062	0.0219976	0.112882	0.0786631	0.177737	0.107654	0.038263	0.111476
	154.597	0.0217184	0.102121	0.0806016	0.181059	0.109581	0.0350076	0.115858
	155.132	0.0203975	0.0883764	0.0811782	0.187319	0.107442	0.02985	0.114166
	155.667	0.0189649	0.0765149	0.0772758	0.18872	0.0980318	0.0260616	0.106451
	156.202	0.0183795	0.0676886	0.0758569	0.187746	0.0917628	0.0233395	0.0983854
	156.737	0.0140637	0.0601329	0.0780503	0.182662	0.0904964	0.0213812	0.0872945
	157.272	0.00938998	0.0533292	0.0791866	0.173646	0.091408	0.0232222	0.0767551
	157.807	0.0109097	0.0475775	0.079777	0.171044	0.0982695	0.0226926	0.0695571
	158.342	0.0128306	0.0489689	0.0816918	0.162352	0.110617	0.0205721	0.0675043
	158.877	0.0149698	0.0501015	0.0798992	0.147157	0.115306	0.0193735	0.0711353
	159.412	0.0146256	0.0561898	0.0763819	0.142597	0.122917	0.0151351	0.0677195
	159.947	0.0128069	0.0579542	0.0750047	0.1458	0.124554	0.0151633	0.0672028
	160.481	0.0138937	0.0588164	0.0668141	0.143437	0.118907	0.016224	0.0711307
	161.016	0.0169999	0.0597188	0.0582845	0.137049	0.118745	0.0167073	0.0759628
	161.551	0.0199368	0.0562732	0.0498544	0.133836	0.109171	0.0105363	0.0786096
	162.086	0.0211117	0.054229	0.0418597	0.135266	0.0982402	0.0115816	0.0835457
	162.621	0.0179799	0.0492852	0.0408346	0.143051	0.0893542	0.0138886	0.0804479
	163.156	0.0140185	0.0414262	0.0442739	0.151313	0.0879557	0.0104035	0.0642815
	163.691	0.0173598	0.038731	0.0494867	0.154955	0.0881171	0.0102727	0.0626426
	164.226	0.0225551	0.0422397	0.0469942	0.157738	0.084798	0.0107858	0.0621438
	164.761	0.0240371	0.0464605	0.0426142	0.157884	0.0820691	0.0218018	0.0666918
	165.296	0.0207679	0.0477076	0.0458251	0.165953	0.0774313	0.0257801	0.0666821
	165.831	0.0109539	0.0436108	0.0478197	0.178382	0.0711001	0.0309337	0.0683004
	166.366	0.00787673	0.0371352	0.0502948	0.181851	0.0680733	0.0353545	0.0659581
	166.901	0.00936107	0.0296548	0.0514054	0.175346	0.0737884	0.0354269	0.0554736
	167.436	0.0137228	0.0235503	0.0442435	0.173606	0.0788817	0.0353471	0.0500466
	167.971	0.017839	0.0248632	0.0439538	0.167063	0.0751048	0.0323985	0.0533517
	168.506	0.0165158	0.0293976	0.0439745	0.162629	0.0684717	0.0254635	0.058027
	169.04	0.013449	0.0351845	0.0437756	0.158029	0.0703939	0.0222834	0.0669991
	169.575	0.0176796	0.0355622	0.0491575	0.152477	0.0730046	0.0218466	0.0756749
	170.11	0.02415	0.0343624	0.0548018	0.144583	0.0794866	0.0228889	0.0799464
	170.645	0.0227221	0.036817	0.0570865	0.136699	0.0831251	0.0279664	0.0711002
	171.18	0.0212684	0.0390524	0.0583715	0.129853	0.0870144	0.0314583	0.0619067
	171.715	0.0232993	0.0438653	0.059842	0.123674	0.0918439	0.0353677	0.0575795
	172.25	0.0195834	0.0471514	0.0640101	0.119892	0.0941771	0.0372311	0.0614465
	172.785	0.0198632	0.0485671	0.0680063	0.117574	0.10522	0.036442	0.0603392
	173.32	0.0207601	0.0466769	0.0731595	0.116359	0.115217	0.0357934	0.0557727
	173.855	0.0208702	0.0437045	0.0697227	0.117174	0.121794	0.0338677	0.0468909
	174.39	0.0255896	0.0398653	0.0672299	0.129603	0.126143	0.0342521	0.0469813
	174.925	0.0274263	0.0403966	0.0645142	0.131385	0.129614	0.0406411	0.0461063
	175.46	0.0237564	0.0465136	0.0632166	0.131065	0.128911	0.0465422	0.0425622
	175.995	0.0217054	0.0493936	0.0644597	0.13469	0.120631	0.0519493	0.040199
	176.53	0.016721	0.0491862	0.0684044	0.134098	0.109061	0.0522213	0.0352341
	177.065	0.0141998	0.0514928	0.0732978	0.138999	0.098217	0.051668	0.0377824
	177.599	0.013137	0.0485833	0.0718734	0.14152	0.0928618	0.0489463	0.0338697
	178.134	0.0104999	0.0451245	0.0717862	0.144796	0.0830284	0.0466107	0.024428
	178.669	0.00887492	0.0448984	0.0711249	0.13865	0.0742955	0.0448937	0.0153593
	179.204	0.0129948	0.0434879	0.0729937	0.125987	0.0731888	0.0515088	0.010272
	179.739	0.015692	0.0420225	0.0715027	0.111733	0.0716723	0.0552712	0.0127231
	180.274	0.020059	0.0424876	0.0649286	0.106378	0.0688762	0.0537278	0.0130954
	180.809	0.0201896	0.0399315	0.0651948	0.102371	0.073789	0.0443398	0.0156499
	181.344	0.017931	0.040442	0.0636999	0.106513	0.0762644	0.0402164	0.0203237
	181.879	0.015048	0.0413138	0.0605112	0.110477	0.0741967	0.0350349	0.0177901
	182.414	0.0160378	0.0399598	0.0525377	0.113648	0.0712101	0.0306748	0.0144652
	182.949	0.0138002	0.0398925	0.0554379	0.121805	0.0752769	0.0265865	0.0132073
	183.484	0.0120031	0.0366047	0.0549899	0.126401	0.0788703	0.0246917	0.00918795
	184.019	0.0132085	0.0358749	0.0530503	0.130441	0.0801111	0.0233032	0.00524478
	184.554	0.00932294	0.0389481	0.0606189	0.132542	0.0799487	0.0280748	0.0023879
	185.089	0.00817888	0.039316	0.0723225	0.133405	0.0776729	0.0286142	0.00426563
	185.624	0.00773501	0.0412869	0.0743607	0.1367	0.0774207	0.0293217	0.00288595
	186.158	0.0100423	0.0424914	0.0763817	0.145569	0.0795883	0.028948	0.00527345
	186.693	0.0102855	0.0385218	0.0793264	0.161131	0.0798393	0.0244992	0.00869686
	187.228	0.00565226	0.0337298	0.0811585	0.160744	0.0751897	0.0192612	0.0110164
	187.763	0.00354301	0.0280896	0.0766366	0.154063	0.0711339	0.0184925	0.0163467
	188.298	0.00345665	0.0265145	0.0704422	0.147204	0.0702877	0.026513	0.017366
	188.833	-0.000957905	0.024898	0.0612677	0.143486	0.0657533	0.0276253	0.0151142
	189.368	-0.00168908	0.0237798	0.0629185	0.1384	0.0608898	0.0293565	0.010169
	189.903	4.18923e-05	0.0246748	0.0660169	0.130407	0.0604534	0.0287069	0.00948131
	190.438	0.00222836	0.0266054	0.061136	0.130115	0.0587364	0.0189975	0.00810239
	190.973	0.00669488	0.0249269	0.0613938	0.127212	0.0574626	0.0166515	0.00192631
	191.508	0.0123154	0.0254415	0.062736	0.132825	0.0531225	0.0121834	0.000582139
	192.043	0.0153232	0.0246996	0.0602457	0.131208	0.0489538	0.00752995	0.004886
	192.578	0.0158005	0.0241774	0.0549633	0.130127	0.0516201	0.0098021	0.0166611
	193.113	0.0154117	0.0237261	0.046495	0.131423	0.0529444	0.017366	0.0237165
	193.648	0.0113299	0.0229423	0.0410173	0.134219	0.0509342	0.0247609	0.0205699
	194.183	0.00747575	0.0218744	0.0381742	0.142441	0.0469962	0.0286712	0.0185958
	194.717	0.00751259	0.0208632	0.0411467	0.139552	0.0441628	0.0364313	0.0180504
	195.252	0.0107272	0.0184134	0.0466534	0.132367	0.0475662	0.0443296	0.0130774
	195.787	0.0102394	0.0197391	0.048626	0.123114	0.0511493	0.0431459	0.00574669
	196.322	0.0113075	0.0258576	0.0482113	0.117421	0.0455258	0.0383063	-0.00685417
	196.857	0.0102835	0.02463	0.0535823	0.113573	0.0465518	0.0322438	-0.0149731
	197.392	0.00802747	0.0274222	0.0583503	0.109506	0.0539952	0.0280194	-0.0156676
	197.927	0.00869406	0.0344893	0.0635576	0.118834	0.0697462	0.0238448	-0.0199666
	198.462	0.00606422	0.0425442	0.0647737	0.135736	0.0796536	0.011848	-0.0297183
	198.997	0.00101792	0.048522	0.0625743	0.147574	0.0792863	2.4261e-05	-0.0345506
	199.532	0.00400296	0.0542066	0.0622356	0.144552	0.0848197	-0.00993273	-0.0356936
	200.067	0.0034486	0.0540457	0.0671885	0.135218	0.0854703	-0.0113235	-0.0331832

## Sheet: WT dorsal
	Figure 4 - figure supplement 1
	WT, dorsal view
		Background-subtracted and normalized intensity in wild-type embryos, dorsal view
	Distance (µm)	Embryo
		1	2	3	4	5	6
	0	0.548275	0.955714	1.62387	1.65134	0.936625	2.84648
	0.534938	0.506403	0.965415	1.66634	1.59771	0.943924	2.86492
	1.06988	0.445856	0.981809	1.63633	1.55531	0.978764	2.78198
	1.60481	0.397665	1.00751	1.62379	1.54101	1.02732	2.61794
	2.13975	0.370775	1.03182	1.5845	1.5529	1.07532	2.53977
	2.67469	0.35882	1.05921	1.5761	1.57427	1.14396	2.35883
	3.20963	0.352745	1.06656	1.56458	1.56409	1.2151	2.28208
	3.74457	0.367657	1.07389	1.50351	1.5057	1.31237	2.24549
	4.27951	0.36887	1.06427	1.44025	1.47812	1.35728	2.28579
	4.81444	0.365313	1.05518	1.39845	1.49625	1.35321	2.39161
	5.34938	0.365505	1.04169	1.35734	1.55038	1.36434	2.46577
	5.88432	0.360605	1.0301	1.32288	1.59043	1.37607	2.47088
	6.41926	0.328082	0.989773	1.30289	1.59692	1.34774	2.40101
	6.9542	0.344725	0.925241	1.2777	1.5859	1.26856	2.39661
	7.48913	0.403576	0.847733	1.23961	1.56717	1.17142	2.3883
	8.02407	0.462634	0.767271	1.21961	1.54786	1.07122	2.36652
	8.55901	0.489553	0.713312	1.15605	1.56819	0.99771	2.37095
	9.09395	0.495581	0.666985	1.1141	1.52618	1.00361	2.37102
	9.62889	0.465186	0.635107	1.06013	1.49344	1.03603	2.28712
	10.1638	0.468987	0.616246	1.00729	1.443	1.02798	2.25746
	10.6988	0.47415	0.610785	0.988094	1.44069	1.00172	2.2252
	11.2337	0.458749	0.618627	0.977218	1.47256	1.02009	2.13526
	11.7686	0.432856	0.640262	0.981933	1.49943	1.03717	2.02181
	12.3036	0.409118	0.667424	1.02416	1.54597	1.0007	1.89943
	12.8385	0.39736	0.668056	1.06654	1.60919	0.99466	1.75401
	13.3735	0.394085	0.661819	1.02722	1.64585	1.00896	1.66217
	13.9084	0.40455	0.653467	1.01985	1.63509	1.00401	1.5624
	14.4433	0.420533	0.635933	1.01799	1.60349	1.00762	1.48357
	14.9783	0.432005	0.600164	1.06427	1.57807	1.00249	1.30066
	15.5132	0.473656	0.558321	1.09454	1.55186	0.995834	1.22487
	16.0481	0.504468	0.518149	1.11185	1.51181	0.999562	1.19644
	16.5831	0.496268	0.492023	1.17458	1.46941	1.01435	1.23255
	17.118	0.481747	0.469278	1.25885	1.46542	1.05137	1.21618
	17.653	0.462273	0.484533	1.33731	1.45467	1.08487	1.29871
	18.1879	0.415738	0.510273	1.38024	1.46129	1.08463	1.40885
	18.7228	0.354558	0.524058	1.39958	1.50784	1.08776	1.50422
	19.2578	0.318374	0.539859	1.34002	1.49933	1.09793	1.53012
	19.7927	0.310846	0.528808	1.33128	1.45293	1.12455	1.49238
	20.3276	0.301939	0.517179	1.32842	1.40037	1.17039	1.43632
	20.8626	0.338752	0.516689	1.31645	1.41906	1.23508	1.41084
	21.3975	0.350324	0.513146	1.28815	1.43179	1.24493	1.39013
	21.9325	0.332315	0.512248	1.25976	1.43018	1.27319	1.39342
	22.4674	0.358012	0.51795	1.23702	1.45074	1.25988	1.35362
	23.0023	0.398346	0.521289	1.23644	1.45724	1.2451	1.3375
	23.5373	0.431876	0.523551	1.27307	1.46104	1.21972	1.28983
	24.0722	0.462146	0.521208	1.31488	1.50137	1.21561	1.24009
	24.6072	0.486341	0.519593	1.31998	1.44559	1.22473	1.15763
	25.1421	0.506953	0.512248	1.28083	1.36378	1.19342	1.07404
	25.677	0.51013	0.483085	1.22402	1.32021	1.14219	0.942293
	26.212	0.481587	0.442066	1.18501	1.30175	1.0494	0.889213
	26.7469	0.449718	0.40544	1.14788	1.30831	1.03009	0.915596
	27.2818	0.417342	0.377906	1.08886	1.32007	1.07315	0.985915
	27.8168	0.375394	0.358287	1.00264	1.33446	1.07326	1.02736
	28.3517	0.353027	0.345217	0.902578	1.3344	1.10022	1.09888
	28.8867	0.337696	0.33604	0.846524	1.32429	1.09672	1.16138
	29.4216	0.334164	0.335276	0.817072	1.31384	1.09307	1.19301
	29.9565	0.350621	0.335511	0.776989	1.32826	1.05869	1.20941
	30.4915	0.347685	0.331715	0.786601	1.3274	1.07107	1.23051
	31.0264	0.322293	0.329303	0.868185	1.35106	1.05795	1.21788
	31.5614	0.293236	0.327927	0.941016	1.36797	1.04325	1.21943
	32.0963	0.288488	0.320402	1.02308	1.39886	1.04651	1.20137
	32.6312	0.279397	0.3098	1.09485	1.40271	1.05561	1.15415
	33.1662	0.266359	0.310748	1.0922	1.38592	1.03253	1.12366
	33.7011	0.251612	0.321233	1.06191	1.37074	1.04913	1.10515
	34.236	0.227413	0.323904	1.0804	1.30517	1.00718	1.0479
	34.771	0.22904	0.315007	1.09638	1.29441	0.990548	1.01191
	35.3059	0.231852	0.304809	1.11819	1.29593	0.957336	1.00148
	35.8409	0.24464	0.294621	1.1499	1.33242	0.943813	0.939153
	36.3758	0.260621	0.294621	1.16813	1.35715	0.935957	0.848902
	36.9107	0.283006	0.302472	1.17783	1.3462	0.932303	0.789215
	37.4457	0.29722	0.303447	1.19722	1.26597	0.924446	0.86619
	37.9806	0.290193	0.303623	1.20883	1.1901	0.925794	0.993597
	38.5155	0.282686	0.304077	1.17493	1.17274	0.936831	1.10129
	39.0505	0.283972	0.304854	1.19267	1.19737	0.919542	1.16003
	39.5854	0.2938	0.304556	1.22418	1.27826	0.904882	1.19553
	40.1204	0.311636	0.299132	1.22331	1.33742	0.895715	1.24234
	40.6553	0.318517	0.290058	1.16493	1.38442	0.897847	1.28319
	41.1902	0.325793	0.274299	1.10193	1.41246	0.909152	1.31499
	41.7252	0.321226	0.265598	1.07313	1.41866	0.905436	1.31552
	42.2601	0.300302	0.270961	1.08723	1.40335	0.918495	1.31526
	42.7951	0.277666	0.280203	1.1105	1.39994	0.94439	1.28047
	43.33	0.252517	0.287507	1.11308	1.39093	0.937119	1.17519
	43.8649	0.237451	0.287199	1.10472	1.42149	0.940655	1.06985
	44.3999	0.240538	0.288222	1.0813	1.46347	0.949234	1.02399
	44.9348	0.258552	0.291473	1.05503	1.5078	0.980916	0.997294
	45.4697	0.274475	0.289307	1.02194	1.53629	1.02148	0.962902
	46.0047	0.267546	0.286985	1.00372	1.55109	1.10427	0.94073
	46.5396	0.27186	0.281946	1.00974	1.56563	1.15299	0.922837
	47.0746	0.278967	0.282533	1.02592	1.55144	1.17428	0.881175
	47.6095	0.288542	0.288563	1.01803	1.52776	1.19264	0.86808
	48.1444	0.287879	0.289465	1.01812	1.46063	1.16808	0.837842
	48.6794	0.280376	0.283353	1.02632	1.36551	1.16005	0.748899
	49.2143	0.276268	0.266378	1.01438	1.27908	1.17422	0.68798
	49.7492	0.284719	0.259109	1.02645	1.21402	1.21481	0.659521
	50.2842	0.329194	0.253218	1.0544	1.14986	1.22139	0.643806
	50.8191	0.372314	0.239032	1.12183	1.09389	1.2471	0.625772
	51.3541	0.404488	0.22748	1.1481	1.03572	1.32397	0.665304
	51.889	0.435515	0.221815	1.13071	1.04148	1.30115	0.720465
	52.4239	0.451779	0.224885	1.12793	1.07329	1.29335	0.764419
	52.9589	0.479296	0.219517	1.10422	1.09983	1.29355	0.78162
	53.4938	0.474396	0.210123	1.04585	1.12355	1.23397	0.831681
	54.0288	0.420751	0.203191	1.03704	1.15531	1.2304	0.864036
	54.5637	0.38435	0.183561	1.02335	1.16735	1.21255	0.862946
	55.0986	0.357454	0.176485	0.996551	1.17268	1.19131	0.827827
	55.6336	0.327845	0.168175	0.971713	1.17831	1.17913	0.827986
	56.1685	0.281004	0.165708	0.969189	1.18155	1.23554	0.82622
	56.7034	0.230898	0.168039	0.975289	1.17451	1.26954	0.83684
	57.2384	0.20906	0.174954	0.977866	1.18995	1.27619	0.842505
	57.7733	0.194611	0.181085	0.993133	1.22023	1.19747	0.812362
	58.3083	0.192917	0.18126	1.03696	1.27421	1.12156	0.749549
	58.8432	0.208642	0.180726	1.06937	1.33009	1.01237	0.696467
	59.3781	0.230093	0.183949	1.06407	1.34228	0.910982	0.679591
	59.9131	0.240713	0.18299	1.05796	1.35051	0.842379	0.642235
	60.448	0.246476	0.182133	1.01878	1.34887	0.785643	0.626293
	60.9829	0.246686	0.182202	0.959292	1.35314	0.732948	0.598219
	61.5179	0.252697	0.186972	0.913832	1.35604	0.726562	0.570431
	62.0528	0.253769	0.186684	0.866982	1.36304	0.74156	0.522761
	62.5878	0.258747	0.181025	0.821219	1.36405	0.739467	0.541994
	63.1227	0.261131	0.179422	0.788498	1.37431	0.726077	0.486065
	63.6576	0.272212	0.176508	0.737524	1.38593	0.743274	0.471456
	64.1926	0.27407	0.165159	0.69594	1.37617	0.784794	0.536813
	64.7275	0.282517	0.159844	0.671405	1.31894	0.811908	0.589096
	65.2625	0.297282	0.156725	0.623126	1.23511	0.845218	0.612114
	65.7974	0.272029	0.15411	0.605725	1.16835	0.842008	0.606711
	66.3323	0.230927	0.154778	0.628407	1.10026	0.84032	0.600842
	66.8673	0.217497	0.150856	0.674966	1.05346	0.842124	0.583467
	67.4022	0.227879	0.14626	0.697993	1.03465	0.808645	0.588075
	67.9371	0.233466	0.147388	0.690266	1.02325	0.797352	0.570002
	68.4721	0.227844	0.144318	0.717593	1.01511	0.809196	0.559537
	69.007	0.240149	0.143188	0.738957	1.01661	0.845158	0.540604
	69.542	0.273829	0.140892	0.751966	1.01068	0.876924	0.527563
	70.0769	0.292513	0.139377	0.726052	1.03594	0.903094	0.507721
	70.6118	0.28869	0.137048	0.687673	1.0867	0.871838	0.495153
	71.1468	0.277765	0.132212	0.684299	1.11954	0.838582	0.459987
	71.6817	0.260432	0.124238	0.679746	1.14817	0.814295	0.429098
	72.2167	0.265473	0.122058	0.667863	1.17427	0.799039	0.430983
	72.7516	0.277459	0.118445	0.670037	1.20015	0.794206	0.431732
	73.2865	0.264661	0.115557	0.671669	1.19424	0.763203	0.456264
	73.8215	0.252185	0.114404	0.670476	1.1932	0.718607	0.468353
	74.3564	0.24354	0.11281	0.673957	1.15725	0.666259	0.468906
	74.8913	0.237502	0.106452	0.665845	1.14029	0.619066	0.442494
	75.4263	0.232721	0.100092	0.631843	1.08149	0.58088	0.453804
	75.9612	0.242377	0.0961762	0.61322	1.01497	0.570809	0.453913
	76.4962	0.251899	0.0894783	0.596935	1.02053	0.571005	0.444856
	77.0311	0.267106	0.0867095	0.562402	1.03528	0.608851	0.404518
	77.566	0.267055	0.0877954	0.528594	1.05399	0.673634	0.359303
	78.101	0.269098	0.0898712	0.513492	1.07311	0.752535	0.316929
	78.6359	0.269442	0.0860805	0.515986	1.06345	0.81019	0.309759
	79.1708	0.274984	0.0826927	0.539827	1.09148	0.798894	0.302392
	79.7058	0.253196	0.0838718	0.547219	1.1035	0.790597	0.323727
	80.2407	0.250331	0.0817123	0.54582	1.11592	0.794709	0.322818
	80.7757	0.249076	0.0786777	0.56789	1.12284	0.799347	0.306543
	81.3106	0.253048	0.0728616	0.569027	1.10475	0.783284	0.344828
	81.8455	0.267711	0.0728895	0.568401	1.0736	0.777277	0.33561
	82.3805	0.282936	0.0696043	0.539904	1.02988	0.749751	0.387445
	82.9154	0.291304	0.0656737	0.515114	1.01892	0.720281	0.411693
	83.4504	0.287834	0.0670365	0.480169	1.01342	0.709962	0.374193
	83.9853	0.282844	0.0665471	0.4431	1.00753	0.684662	0.344894
	84.5202	0.282393	0.0642801	0.412631	1.01817	0.657523	0.345354
	85.0552	0.284004	0.0590425	0.397204	1.01894	0.633119	0.347949
	85.5901	0.288938	0.0523806	0.371243	1.05293	0.623211	0.375225
	86.125	0.306844	0.0520032	0.342799	1.05182	0.615181	0.388955
	86.66	0.327602	0.0579729	0.329336	1.06307	0.6209	0.409569
	87.1949	0.318823	0.0617077	0.325812	1.02155	0.614575	0.411655
	87.7299	0.307754	0.0615138	0.331887	1.01639	0.59777	0.430992
	88.2648	0.301296	0.0638089	0.351685	1.0248	0.583595	0.45708
	88.7997	0.332394	0.0654973	0.373857	1.06159	0.553135	0.487878
	89.3347	0.340873	0.0694716	0.400621	1.08485	0.516878	0.495549
	89.8696	0.337183	0.072086	0.429182	1.04227	0.502162	0.487221
	90.4045	0.320354	0.0723946	0.457317	0.96558	0.469013	0.478084
	90.9395	0.304347	0.0706447	0.47784	0.909111	0.458415	0.450033
	91.4744	0.306117	0.070935	0.481506	0.900669	0.446056	0.439971
	92.0094	0.285972	0.0697144	0.479495	0.925035	0.440891	0.43044
	92.5443	0.253962	0.065651	0.46901	0.975357	0.434311	0.394672
	93.0792	0.22557	0.0632869	0.450461	1.01496	0.431207	0.366042
	93.6142	0.204466	0.059143	0.433247	1.03629	0.428634	0.322216
	94.1491	0.205548	0.054514	0.403842	1.04041	0.424543	0.270713
	94.6841	0.206458	0.0526252	0.386132	1.04731	0.418864	0.192176
	95.219	0.201556	0.0524152	0.361197	1.06143	0.40492	0.148561
	95.7539	0.207386	0.05022	0.301491	1.0896	0.394216	0.146332
	96.2889	0.219636	0.0481449	0.259445	1.12031	0.386931	0.156065
	96.8238	0.223778	0.0479431	0.245619	1.13844	0.385262	0.187296
	97.3587	0.236117	0.0460865	0.258553	1.1573	0.391804	0.206711
	97.8937	0.269177	0.0457763	0.279739	1.16169	0.392936	0.282661
	98.4286	0.294349	0.0439841	0.27481	1.1439	0.387318	0.303415
	98.9636	0.294454	0.0388969	0.282862	1.10268	0.381812	0.317905
	99.4985	0.29078	0.0315578	0.296771	1.04137	0.369635	0.324314
	100.033	0.28361	0.0281273	0.314016	0.98911	0.355499	0.347002
	100.568	0.279616	0.0236448	0.319074	0.913542	0.353717	0.343007
	101.103	0.271069	0.0204664	0.2978	0.875602	0.364121	0.319766
	101.638	0.25598	0.0171158	0.274585	0.864691	0.384075	0.295362
	102.173	0.240981	0.0174495	0.243503	0.851052	0.415892	0.299731
	102.708	0.23219	0.0216515	0.228533	0.854936	0.448732	0.297902
	103.243	0.225595	0.0252368	0.232587	0.847123	0.457374	0.322094
	103.778	0.227602	0.0307904	0.231838	0.823543	0.437704	0.353417
	104.313	0.246717	0.033506	0.235047	0.811417	0.419968	0.367515
	104.848	0.264374	0.0337668	0.244625	0.812675	0.410385	0.400966
	105.383	0.267408	0.0375899	0.229604	0.80036	0.391865	0.42404
	105.918	0.269443	0.0359958	0.230475	0.796802	0.378276	0.441705
	106.453	0.276889	0.0325443	0.236222	0.806381	0.373559	0.415805
	106.988	0.289792	0.0305722	0.253755	0.81475	0.380334	0.376066
	107.523	0.307413	0.028153	0.268171	0.83523	0.377202	0.330959
	108.058	0.328328	0.026433	0.265012	0.860464	0.377114	0.303486
	108.592	0.333747	0.025081	0.277803	0.911245	0.377669	0.294028
	109.127	0.293047	0.0233679	0.287553	0.924365	0.382262	0.278034
	109.662	0.26122	0.0216098	0.273295	0.938458	0.378662	0.250013
	110.197	0.251064	0.0193843	0.259328	0.929486	0.371776	0.244183
	110.732	0.243537	0.0177694	0.248829	0.93324	0.36117	0.246453
	111.267	0.244989	0.0155146	0.23964	0.915455	0.348556	0.273353
	111.802	0.2338	0.0140068	0.222561	0.901146	0.339145	0.299948
	112.337	0.226434	0.0155065	0.213459	0.884287	0.330272	0.282889
	112.872	0.220247	0.0140439	0.215499	0.869135	0.320294	0.288023
	113.407	0.214976	0.0134045	0.231334	0.848377	0.32694	0.324232
	113.942	0.196846	0.0107398	0.242156	0.841644	0.337413	0.366272
	114.477	0.181979	0.00931083	0.255263	0.839459	0.346404	0.382063
	115.012	0.180192	0.0116732	0.277055	0.844587	0.34924	0.393071
	115.547	0.184741	0.00962375	0.290192	0.842714	0.346	0.407542
	116.082	0.200244	0.00226602	0.281555	0.857072	0.34099	0.408101
	116.617	0.227465	0.00330818	0.277992	0.880342	0.333776	0.408905
	117.151	0.249428	0.00389407	0.278725	0.883636	0.3202	0.425787
	117.686	0.272495	0.00463664	0.270221	0.867759	0.314245	0.424241
	118.221	0.278132	0.00065523	0.262601	0.853416	0.305117	0.439866
	118.756	0.301002	-0.000446004	0.249892	0.844916	0.28764	0.45553
	119.291	0.340358	-0.000230911	0.236799	0.845281	0.291047	0.451477
	119.826	0.355068	-0.0011363	0.218134	0.830184	0.288782	0.433071
	120.361	0.356929	0.00216167	0.195404	0.835426	0.288017	0.397569
	120.896	0.354959	0.00475888	0.165561	0.832957	0.266765	0.330342
	121.431	0.340524	0.00837783	0.134144	0.820184	0.267643	0.301595
	121.966	0.307883	0.00267346	0.112775	0.808517	0.285463	0.271776
	122.501	0.271003	-0.00165167	0.0971619	0.796709	0.3018	0.272272
	123.036	0.248177	-0.00290535	0.0837271	0.7905	0.297923	0.252943
	123.571	0.252594	-0.000357003	0.0816332	0.783644	0.289891	0.219665
	124.106	0.239764	-0.0013904	0.0764539	0.765873	0.288382	0.201666
	124.641	0.226284	-0.0020153	0.0673545	0.758364	0.287573	0.160984
	125.176	0.212225	-0.00358639	0.0597546	0.75546	0.287169	0.13659
	125.71	0.199559	-0.00212291	0.0556587	0.760643	0.28433	0.120198
	126.245	0.185384	-0.00527763	0.0497279	0.777012	0.285636	0.0746824
	126.78	0.177938	-0.00534515	0.0522828	0.789802	0.284797	0.040657
	127.315	0.200867	-0.00488863	0.0576218	0.802044	0.274954	0.0705366
	127.85	0.222231	-0.0045158	0.0618992	0.830257	0.267266	0.0847161
	128.385	0.22857	-0.00280463	0.0645998	0.848391	0.254775	0.0977009
	128.92	0.239555	-0.00109765	0.0661167	0.833468	0.239989	0.150274
	129.455	0.254325	0.00200341	0.0676969	0.803543	0.2224	0.277172
	129.99	0.252181	0.0034285	0.0722861	0.771752	0.219639	0.27366
	130.525	0.249419	0.00172235	0.0784046	0.771805	0.221125	0.282358
	131.06	0.247264	-0.000836056	0.0916092	0.767149	0.233968	0.329717
	131.595	0.237923	0.00184288	0.095635	0.774228	0.265051	0.361175
	132.13	0.242348	0.00197034	0.101178	0.774774	0.27552	0.367589
	132.665	0.271777	-0.00256265	0.118143	0.791913	0.275622	0.380543
	133.2	0.292505	-0.00660866	0.137323	0.803402	0.271898	0.342505
	133.735	0.309349	-0.00871	0.149503	0.813491	0.273452	0.307013
	134.269	0.30084	-0.0070113	0.153034	0.824941	0.275116	0.304541
	134.804	0.292567	-0.00640723	0.151071	0.842144	0.275459	0.300529
	135.339	0.288313	-0.0095192	0.141013	0.847163	0.276068	0.267678
	135.874	0.272006	-0.0114104	0.130216	0.842856	0.272948	0.252573
	136.409	0.265877	-0.0142836	0.124155	0.844024	0.281528	0.235261
	136.944	0.249536	-0.0147913	0.131264	0.877872	0.297978	0.223591
	137.479	0.235446	-0.0162753	0.131316	0.911515	0.290966	0.192211
	138.014	0.221085	-0.0163635	0.113007	0.94288	0.275887	0.193553
	138.549	0.215826	-0.0159095	0.0922405	0.965555	0.281721	0.183222
	139.084	0.22082	-0.0122114	0.0735431	0.983718	0.286594	0.163901
	139.619	0.217426	-0.00926348	0.0615939	0.973951	0.29257	0.131997
	140.154	0.21504	-0.00796369	0.0336789	0.965765	0.298888	0.120796
	140.689	0.213992	-0.00688113	0.0133185	0.929006	0.292287	0.0831275
	141.224	0.208978	-0.00739519	0.0069006	0.878371	0.291525	0.107008
	141.759	0.209052	-0.00399722	0.00997543	0.833102	0.293759	0.168141
	142.294	0.22481	-2.12617e-05	0.00813711	0.790223	0.296406	0.196927
	142.828	0.243946	0.00309843	-0.00338862	0.75944	0.295415	0.216048
	143.363	0.24225	0.00181271	-0.0152822	0.72145	0.312773	0.245022
	143.898	0.240547	0.00217039	-0.0198476	0.712901	0.329575	0.281751
	144.433	0.250386	-0.0017055	-0.0289605	0.728749	0.332323	0.298979
	144.968	0.245591	0.0015264	-0.0417493	0.730868	0.329567	0.293196
	145.503	0.250145	0.00774028	-0.0662731	0.723842	0.330181	0.29786
	146.038	0.25072	0.0105119	-0.0812855	0.754903	0.322509	0.30377
	146.573	0.244399	0.00890617	-0.0722944	0.76811	0.309602	0.31943
	147.108	0.232949	0.0073868	-0.0672778	0.757575	0.303135	0.330022
	147.643	0.225135	0.00959435	-0.0442507	0.728253	0.306764	0.320759
	148.178	0.217965	0.00862884	-0.026904	0.765304	0.306069	0.276436
	148.713	0.216858	0.00410779	-0.0189056	0.798252	0.31072	0.221834
	149.248	0.218124	0.000232872	-0.0189689	0.818138	0.308541	0.170491
	149.783	0.210014	-0.00242712	-0.00622909	0.820417	0.311048	0.13795
	150.318	0.206788	-0.0041471	0.0158111	0.807666	0.326617	0.119968
	150.853	0.193654	-0.00476239	0.0303127	0.797356	0.341313	0.112151
	151.387	0.168231	-0.00546735	0.0413464	0.810533	0.364627	0.102537
	151.922	0.159202	-0.00630158	0.027893	0.836148	0.372743	0.0921355
	152.457	0.156691	-0.00872245	0.0101229	0.850705	0.37098	0.0428844
	152.992	0.165575	-0.0102699	-0.00893337	0.849512	0.37767	0.00117938
	153.527	0.171345	-0.0138042	-0.0243344	0.847111	0.388331	-0.0235592
	154.062	0.20075	-0.016046	-0.0429526	0.853377	0.422872	0.00560426
	154.597	0.226735	-0.0178704	-0.0645045	0.862276	0.439727	0.0277087
	155.132	0.246943	-0.0158747	-0.0714584	0.860438	0.458723	0.076687
	155.667	0.265923	-0.0167026	-0.0785114	0.818952	0.467054	0.112636
	156.202	0.279192	-0.0163828	-0.0867671	0.780928	0.477129	0.146146
	156.737	0.300001	-0.013598	-0.098814	0.756847	0.490747	0.204143
	157.272	0.300663	-0.0135395	-0.110022	0.754342	0.496962	0.245026
	157.807	0.310932	0.0156954	-0.111661	0.76286	0.501334	0.261982
	158.342	0.314831	0.0146534	-0.110418	0.772464	0.501082	0.271096
	158.877	0.308995	0.0151574	-0.108193	0.770109	0.493609	0.270924
	159.412	0.30233	0.0144164	-0.0972139	0.767892	0.486177	0.240899
	159.947	0.299173	0.0112718	-0.0863039	0.814106	0.482075	0.20557
	160.481	0.291808	0.0134518	-0.071497	0.822825	0.485808	0.182161
	161.016	0.28313	0.0142773	-0.0334545	0.833417	0.487924	0.139507
	161.551	0.273351	0.0180112	0.00924876	0.841299	0.493305	0.0870555
	162.086	0.266132	0.0216779	0.0289084	0.84493	0.498526	0.052976
	162.621	0.259933	0.0233747	0.0299894	0.832068	0.500434	0.0277886
	163.156	0.256632	0.0219656	0.0125815	0.794559	0.507958	0.00686153
	163.691	0.26781	0.0195363	-0.00481061	0.77749	0.511651	0.00268206
	164.226	0.278326	0.0164651	-0.0179336	0.768121	0.51571	-0.00951662
	164.761	0.264144	0.0168103	-0.0244034	0.771274	0.519454	-0.0113024
	165.296	0.273452	0.0182046	-0.0310136	0.769381	0.523109	0.014738
	165.831	0.280278	0.0219774	-0.0274986	0.759102	0.53132	0.0273137
	166.366	0.283894	0.0258896	-0.0177833	0.735323	0.543591	0.0272078
	166.901	0.285377	0.0311024	-0.0140514	0.73237	0.555093	0.0112435
	167.436	0.281374	0.0362907	-0.0153813	0.749536	0.558238	0.0138921
	167.971	0.295188	0.0354347	-0.0176308	0.787886		0.00439515
	168.506	0.287993	0.0323906	-0.00860475	0.823478		-0.013403
	169.04	0.2984	0.0314847	0.00261362	0.861049		-0.035331
	169.575	0.306703	0.0333323	0.0147302	0.892117		-0.0356979
	170.11	0.316962	0.0422343	0.00681581	0.922799		-0.0057565
	170.645	0.313773	0.0468781	0.00977692	0.902218		0.0356078
	171.18	0.29058	0.0375358	0.00837958	0.890202		0.0737322
	171.715	0.282927	0.0248477	0.010113	0.881186		0.0660015
	172.25	0.275695	0.0234524	0.0119725	0.862235		0.0754591
	172.785	0.269831	0.030799	0.00564878	0.830039		0.0828401
	173.32	0.260602	0.036373	0.00466937	0.833544		0.0969495
	173.855	0.24665	0.0419331	0.0010014	0.833307		0.101243
	174.39	0.235017	0.0417418	0.00637787	0.809768		0.105402
	174.925	0.224415	0.0422733	0.00310699	0.809729		0.0850112
	175.46	0.209173	0.041799	-0.00762938	0.808676		0.066572
	175.995	0.194321	0.043726	-0.00889514	0.786193		0.0576799
	176.53	0.178486	0.0432276	-0.0157827	0.766433		0.068908
	177.065	0.170437	0.0377715	-0.0250197	0.747056		0.0721305
	177.599	0.192196	0.0343591	-0.0309608	0.733058		0.0690467
	178.134	0.234493	0.0289218	-0.0326084	0.708077		0.0475742
	178.669	0.276663	0.0228552	-0.0330032	0.698731		0.0278593
	179.204	0.312188	0.0236003	-0.0248534	0.712541		0.00714601
	179.739	0.322911	0.0248746	-0.0225823	0.722726		-0.00816951
	180.274	0.318989	0.0225705	-0.0208552	0.748796		-0.00550358
	180.809	0.31124	0.0169213	-0.0182985	0.778755		-0.0020754
	181.344	0.308585	0.0125685	-0.0176057	0.804356		0.00867032
	181.879	0.323046	0.0126922	-0.0134148	0.834176		0.0132604
	182.414	0.326261	0.0125745	0.00105513	0.853145		0.0197443
	182.949	0.329099	0.0113634	0.0123198	0.861898		0.0185303
	183.484	0.326347	0.00480541	0.0185804	0.859886		0.00384637
	184.019	0.310646	-1.25367e-05	0.0236777	0.848068		-0.0158736
	184.554	0.296549	-0.00412192	0.0257461	0.804765		-0.0309865
	185.089	0.273127	-0.00510053	0.0215903	0.740567		-0.0562718
	185.624	0.248296	-0.00101646	0.0256881	0.697332		-0.0657116
	186.158	0.229724	0.00494699	0.0286037	0.628573		-0.0632298
	186.693	0.213	0.00324474	0.0372325	0.556665		-0.0491134
	187.228	0.212987	0.0040037	0.0489427	0.577409		-0.0428407
	187.763	0.212734	0.00351376	0.0473759	0.609052		-0.0668607
	188.298	0.220797	8.31815e-05	0.0419938	0.62684		-0.05586
	188.833	0.23692	-0.00223064	0.0354428	0.641851		-0.048929
	189.368	0.245913	0.000310456	0.0275973	0.672157		-0.0540726
	189.903	0.259592	0.00222136	0.0320592	0.700296		-0.0630567
	190.438	0.268845	0.00221306	0.034519	0.735358		-0.0509508
	190.973	0.268871	0.00137688	0.0397445	0.762159		-0.0485273
	191.508	0.274363	0.00419778	0.0378097	0.78558		-0.0343625
	192.043	0.271677	0.00546139	0.034508	0.801404		-0.015135
	192.578	0.269013	0.0049183	0.0389217	0.808586		-0.0108627
	193.113	0.272335	0.00310284	0.0411941	0.797042		-0.0159093
	193.648	0.271871	0.00185161	0.0425188	0.793873		-0.0258479
	194.183	0.268376	0.00437034	0.0378382	0.77775		-0.0380498
	194.717	0.262853	0.00681976	0.0312566	0.77808		-0.0438293
	195.252	0.271487	0.00715559	0.0274678	0.785541		-0.0386036
	195.787	0.270266	0.00530049	0.0248866	0.760739		-0.0340459
	196.322	0.263035	0.00333211	0.0277296	0.724638		-0.0427973
	196.857	0.257825	0.00376926	0.0278646	0.688176		-0.0469595
	197.392	0.254411	0.00743375	0.0266344	0.654579		-0.0474173
	197.927	0.245591	0.0118609	0.0302827	0.625506		-0.0557961
	198.462	0.237672	0.01613	0.0319449	0.603748		-0.0649331
	198.997	0.230785	0.0207461	0.0210653	0.589319		-0.0748835
	199.532	0.220737	0.0176766	0.0156067	0.54942		-0.0806692
	200.067	0.205834	0.0151211	0.0107104	0.527915		-0.0812639

## Sheet: acvr1ba lateral
	Figure 4 - figure supplement 1
	acvr1b-a-/-, lateral view
		Background-subtracted and normalized intensity in acvr1b-a-/- embryos, lateral view
	Distance (µm)	Embryo
		1	2	3	4	5	6	7	8	9	10
	0	0.480851	0.52114	0.511313	0.913571	0.872723	0.583589	0.866103	0.916088	1.54429	1.08597
	0.534938	0.482058	0.497096	0.511398	0.899741	0.916055	0.607221	0.813874	0.914111	1.55615	1.08763
	1.06988	0.475078	0.496834	0.495403	0.875804	0.946391	0.638885	0.76112	0.928214	1.55692	1.08777
	1.60481	0.470338	0.503673	0.483233	0.842616	0.961551	0.641094	0.817651	0.909229	1.52702	1.07793
	2.13975	0.465899	0.50147	0.484884	0.814161	0.985424	0.651644	0.860571	0.919185	1.45687	1.05529
	2.67469	0.468336	0.497033	0.491163	0.796587	1.01007	0.666578	0.844773	0.932805	1.40522	1.05061
	3.20963	0.470285	0.495474	0.491901	0.785324	1.02366	0.690302	0.838973	0.96116	1.37475	1.03768
	3.74457	0.470799	0.48499	0.492985	0.780503	1.02501	0.680505	0.824571	0.990576	1.34922	1.01212
	4.27951	0.461868	0.489733	0.480142	0.763411	1.01868	0.674529	0.800886	1.00033	1.34188	0.999438
	4.81444	0.450524	0.496534	0.454957	0.731148	0.992141	0.663141	0.78331	0.995039	1.33001	0.967624
	5.34938	0.429073	0.480562	0.446545	0.681477	0.921213	0.664477	0.743403	1.00414	1.31813	0.944822
	5.88432	0.40589	0.481607	0.440469	0.664431	0.849201	0.642096	0.694636	1.03264	1.31662	0.911264
	6.41926	0.381133	0.478409	0.435249	0.670846	0.806888	0.626847	0.672471	1.04333	1.31131	0.889406
	6.9542	0.345652	0.488342	0.427658	0.649517	0.772206	0.5961	0.669378	1.06476	1.34449	0.870657
	7.48913	0.314729	0.497341	0.425187	0.627033	0.755527	0.571286	0.68857	1.0475	1.35154	0.89013
	8.02407	0.293307	0.477716	0.413216	0.590746	0.759323	0.557145	0.695322	1.02398	1.39345	0.882488
	8.55901	0.278476	0.43361	0.404491	0.573658	0.751674	0.545817	0.704258	1.00291	1.40164	0.854547
	9.09395	0.258481	0.411211	0.414808	0.559758	0.750666	0.533826	0.717566	0.931496	1.44621	0.839513
	9.62889	0.240553	0.401192	0.419483	0.580553	0.747635	0.542763	0.720531	0.867104	1.49487	0.84938
	10.1638	0.226404	0.409355	0.410701	0.592609	0.733695	0.531187	0.715192	0.832682	1.50044	0.844685
	10.6988	0.223509	0.410543	0.396445	0.596108	0.705951	0.534883	0.696739	0.824322	1.51628	0.808974
	11.2337	0.229221	0.411476	0.387899	0.610014	0.678852	0.540394	0.698078	0.813325	1.50848	0.816382
	11.7686	0.241118	0.411058	0.378476	0.626532	0.67087	0.541111	0.698108	0.796954	1.52464	0.795968
	12.3036	0.245551	0.398756	0.365631	0.633749	0.673688	0.534786	0.727132	0.799439	1.52452	0.769926
	12.8385	0.250293	0.38799	0.355822	0.616054	0.683896	0.534777	0.736882	0.817533	1.52544	0.749118
	13.3735	0.254868	0.379885	0.341115	0.595577	0.712473	0.537523	0.755113	0.850407	1.52041	0.747574
	13.9084	0.255926	0.371136	0.322007	0.567196	0.759612	0.55511	0.75536	0.871157	1.53426	0.764012
	14.4433	0.260895	0.350851	0.316981	0.548515	0.775185	0.548641	0.729206	0.879657	1.52112	0.766572
	14.9783	0.265984	0.331217	0.319097	0.532191	0.781116	0.535696	0.66826	0.887094	1.57295	0.767011
	15.5132	0.265984	0.32177	0.319858	0.526613	0.764705	0.534557	0.623822	0.87981	1.5818	0.785595
	16.0481	0.265534	0.313458	0.317826	0.523765	0.742996	0.537987	0.606078	0.864079	1.60191	0.795801
	16.5831	0.26435	0.291472	0.319208	0.515801	0.748655	0.545676	0.586235	0.866176	1.57272	0.811265
	17.118	0.260223	0.257616	0.330911	0.506154	0.761053	0.549887	0.571583	0.882234	1.53878	0.822242
	17.653	0.261685	0.237412	0.348524	0.492746	0.78056	0.544516	0.540379	0.890056	1.5053	0.823627
	18.1879	0.261074	0.219794	0.364587	0.489377	0.792116	0.540027	0.517037	0.869574	1.47449	0.791579
	18.7228	0.258854	0.201875	0.367561	0.492455	0.798823	0.533183	0.495845	0.85346	1.4577	0.74092
	19.2578	0.257047	0.195779	0.375707	0.495449	0.806363	0.534979	0.472813	0.859868	1.41746	0.701872
	19.7927	0.253093	0.19419	0.376341	0.499285	0.785905	0.536019	0.455428	0.872352	1.40185	0.703352
	20.3276	0.244801	0.19461	0.376418	0.499997	0.770678	0.53944	0.440161	0.866972	1.4007	0.717093
	20.8626	0.235181	0.203591	0.377468	0.490152	0.761122	0.550031	0.447794	0.848048	1.38244	0.72598
	21.3975	0.233477	0.209376	0.357746	0.488536	0.78577	0.544899	0.456361	0.83082	1.34894	0.723181
	21.9325	0.248407	0.219163	0.34377	0.491787	0.761978	0.520478	0.445396	0.798615	1.32186	0.695464
	22.4674	0.25474	0.223913	0.343308	0.487314	0.692864	0.501835	0.457922	0.758835	1.28907	0.672664
	23.0023	0.254549	0.227864	0.342931	0.4778	0.63838	0.487646	0.476494	0.740001	1.27478	0.683317
	23.5373	0.256515	0.232803	0.338442	0.457788	0.618941	0.482708	0.493239	0.731633	1.27411	0.695549
	24.0722	0.253094	0.237051	0.341309	0.42997	0.612306	0.470256	0.481914	0.729713	1.27531	0.711632
	24.6072	0.245279	0.248635	0.343142	0.395388	0.614911	0.469654	0.470545	0.730972	1.26331	0.731143
	25.1421	0.240227	0.260376	0.339161	0.370657	0.625862	0.467571	0.461327	0.751496	1.25107	0.762487
	25.677	0.23565	0.265243	0.333519	0.350821	0.617869	0.445324	0.457657	0.745764	1.26326	0.764458
	26.212	0.232079	0.274409	0.327691	0.333983	0.60859	0.42064	0.442661	0.725014	1.28769	0.757409
	26.7469	0.228683	0.280847	0.31913	0.323807	0.594924	0.407205	0.442503	0.680327	1.28239	0.741608
	27.2818	0.224869	0.278763	0.327295	0.308424	0.587097	0.40709	0.439193	0.657878	1.28121	0.747789
	27.8168	0.221071	0.271017	0.344179	0.297126	0.565764	0.405252	0.463356	0.631738	1.25163	0.697055
	28.3517	0.220821	0.263926	0.357807	0.2948	0.557776	0.40477	0.483423	0.642105	1.24592	0.666845
	28.8867	0.219712	0.261818	0.358327	0.299786	0.560077	0.403442	0.525869	0.678526	1.25053	0.64736
	29.4216	0.217685	0.261563	0.36698	0.304119	0.558636	0.402445	0.535767	0.708564	1.21577	0.621536
	29.9565	0.213475	0.25179	0.384494	0.301367	0.536631	0.392505	0.551198	0.705466	1.19518	0.608108
	30.4915	0.205045	0.245507	0.390982	0.294057	0.512573	0.376546	0.554253	0.689148	1.16137	0.578975
	31.0264	0.19716	0.236147	0.401274	0.281748	0.500462	0.378107	0.561632	0.666975	1.16879	0.548481
	31.5614	0.192242	0.22988	0.396244	0.278748	0.499715	0.385342	0.553418	0.65563	1.19573	0.531799
	32.0963	0.194834	0.216765	0.391273	0.274001	0.482275	0.396598	0.546866	0.657472	1.24163	0.541483
	32.6312	0.199535	0.204836	0.393139	0.27814	0.472583	0.4099	0.553368	0.651838	1.26289	0.578964
	33.1662	0.200393	0.196368	0.391568	0.290071	0.462342	0.407125	0.533875	0.647478	1.2361	0.597277
	33.7011	0.201137	0.189068	0.3888	0.307306	0.459006	0.400564	0.497319	0.640641	1.19932	0.600246
	34.236	0.200662	0.179073	0.373697	0.316768	0.454281	0.399113	0.455738	0.622843	1.15191	0.590781
	34.771	0.202529	0.16699	0.354027	0.32329	0.447555	0.394214	0.425495	0.619273	1.15748	0.576988
	35.3059	0.199337	0.166382	0.334382	0.326778	0.447172	0.38258	0.409616	0.621929	1.14233	0.57065
	35.8409	0.192757	0.176322	0.321727	0.332898	0.454309	0.370608	0.392115	0.616648	1.12049	0.550115
	36.3758	0.190045	0.1876	0.31593	0.330166	0.450846	0.349468	0.368464	0.615014	1.10186	0.532618
	36.9107	0.183752	0.190387	0.311146	0.320741	0.441175	0.330488	0.346147	0.621019	1.07575	0.521025
	37.4457	0.176066	0.192726	0.298003	0.30588	0.437984	0.313367	0.331824	0.605771	1.09405	0.514048
	37.9806	0.161048	0.189207	0.271088	0.296597	0.437972	0.305627	0.31828	0.573464	1.10745	0.49918
	38.5155	0.152336	0.187749	0.249391	0.289928	0.433941	0.303951	0.311819	0.545653	1.12619	0.477115
	39.0505	0.145213	0.192318	0.240212	0.284838	0.422512	0.296151	0.303862	0.514322	1.13519	0.442217
	39.5854	0.141115	0.194355	0.234159	0.28872	0.418114	0.29125	0.29445	0.494348	1.13933	0.40584
	40.1204	0.142812	0.189276	0.234487	0.295015	0.413012	0.295772	0.290688	0.484905	1.13462	0.372764
	40.6553	0.14572	0.185698	0.24066	0.308627	0.417503	0.293646	0.297259	0.478741	1.1166	0.348125
	41.1902	0.151282	0.191637	0.249352	0.314679	0.421662	0.304322	0.28939	0.482197	1.06619	0.348157
	41.7252	0.153758	0.199503	0.253281	0.319257	0.414948	0.312363	0.288757	0.495349	1.02507	0.372621
	42.2601	0.154773	0.195164	0.254022	0.316169	0.405982	0.314679	0.278944	0.492997	0.989015	0.374339
	42.7951	0.151543	0.192315	0.248514	0.311148	0.40163	0.309758	0.281457	0.482805	0.980101	0.376071
	43.33	0.146065	0.190636	0.248684	0.311642	0.389561	0.299042	0.288761	0.469641	0.956306	0.394312
	43.8649	0.140471	0.191401	0.244398	0.313227	0.379379	0.287436	0.288804	0.463177	0.930094	0.408307
	44.3999	0.134804	0.191518	0.230711	0.307241	0.370588	0.278151	0.299071	0.471253	0.906207	0.412857
	44.9348	0.12769	0.183482	0.218618	0.300912	0.359447	0.277759	0.303292	0.483211	0.902228	0.412712
	45.4697	0.131251	0.173089	0.211457	0.290599	0.357457	0.288077	0.304819	0.48542	0.908599	0.40904
	46.0047	0.133941	0.164211	0.208213	0.280564	0.359243	0.293187	0.299935	0.492674	0.920421	0.395245
	46.5396	0.134516	0.149339	0.207343	0.282078	0.354157	0.286683	0.28132	0.49539	0.899522	0.382709
	47.0746	0.135501	0.136212	0.210409	0.27707	0.346929	0.276397	0.272099	0.505329	0.890583	0.364997
	47.6095	0.13736	0.128562	0.215331	0.275044	0.344575	0.264489	0.270999	0.508541	0.877278	0.374648
	48.1444	0.137412	0.134994	0.228774	0.280061	0.348606	0.264847	0.258925	0.507357	0.841637	0.373498
	48.6794	0.134221	0.137956	0.231008	0.283955	0.358347	0.256788	0.239946	0.513372	0.771991	0.375956
	49.2143	0.130263	0.142291	0.225136	0.277662	0.358671	0.259705	0.219319	0.522344	0.719965	0.372531
	49.7492	0.125555	0.141586	0.220087	0.261599	0.357764	0.265307	0.218441	0.512657	0.674961	0.360662
	50.2842	0.123585	0.132718	0.216542	0.246821	0.348813	0.271177	0.215567	0.49212	0.619561	0.358374
	50.8191	0.123883	0.131004	0.212576	0.235903	0.338081	0.26077	0.219381	0.49447	0.588565	0.3494
	51.3541	0.126231	0.129169	0.205161	0.234787	0.322434	0.260345	0.235941	0.498982	0.567466	0.333185
	51.889	0.127936	0.128753	0.201164	0.232638	0.315048	0.263335	0.252475	0.514261	0.553972	0.33028
	52.4239	0.127267	0.129752	0.202328	0.231436	0.310154	0.27002	0.265734	0.517876	0.544085	0.325781
	52.9589	0.122921	0.126942	0.209148	0.227597	0.299782	0.27146	0.284609	0.511316	0.536291	0.324631
	53.4938	0.118901	0.125379	0.211436	0.22297	0.29437	0.275211	0.28848	0.510964	0.527611	0.313538
	54.0288	0.115171	0.119993	0.213193	0.216031	0.282672	0.267801	0.285871	0.497599	0.521592	0.308539
	54.5637	0.111449	0.121516	0.219313	0.209515	0.276949	0.250321	0.286428	0.483305	0.50937	0.303572
	55.0986	0.111799	0.117952	0.216943	0.200437	0.264994	0.239122	0.298562	0.460805	0.508845	0.30591
	55.6336	0.114477	0.115377	0.213916	0.206105	0.246868	0.2307	0.313336	0.449174	0.512897	0.296528
	56.1685	0.116226	0.101844	0.207519	0.210618	0.240208	0.225553	0.31928	0.427774	0.517453	0.294917
	56.7034	0.115712	0.0915107	0.199665	0.210864	0.245922	0.223	0.313219	0.403276	0.514817	0.289926
	57.2384	0.113764	0.0819546	0.191897	0.213131	0.243935	0.221837	0.308186	0.381177	0.51184	0.285558
	57.7733	0.112897	0.0769636	0.190584	0.213727	0.240262	0.226829	0.301462	0.374639	0.511835	0.282627
	58.3083	0.114609	0.0735878	0.19604	0.211857	0.234253	0.235644	0.295613	0.35109	0.507284	0.276272
	58.8432	0.109475	0.0778322	0.201104	0.217963	0.233516	0.242884	0.273873	0.341542	0.491097	0.277893
	59.3781	0.103496	0.0865481	0.200609	0.227181	0.229631	0.244419	0.255667	0.337748	0.456975	0.286429
	59.9131	0.0974671	0.0918571	0.187693	0.231263	0.223636	0.246349	0.240044	0.324217	0.434625	0.28102
	60.448	0.0915937	0.0926224	0.169321	0.238824	0.226775	0.252206	0.22927	0.303414	0.412673	0.272608
	60.9829	0.0867557	0.094902	0.160603	0.252548	0.22701	0.256601	0.22801	0.295614	0.397236	0.271017
	61.5179	0.0838235	0.0975457	0.15882	0.267312	0.231816	0.249262	0.223908	0.288387	0.381515	0.262699
	62.0528	0.0803713	0.101208	0.159738	0.271019	0.235419	0.246319	0.222232	0.295276	0.361139	0.265471
	62.5878	0.0775399	0.102335	0.156357	0.271231	0.233716	0.245963	0.199059	0.292859	0.345049	0.254174
	63.1227	0.0779906	0.102963	0.156502	0.26361	0.226293	0.245488	0.179948	0.292327	0.324942	0.24979
	63.6576	0.0803774	0.107456	0.151259	0.26013	0.22249	0.25074	0.174321	0.289732	0.309815	0.249632
	64.1926	0.0809981	0.111822	0.148315	0.24575	0.215927	0.251186	0.162551	0.281645	0.302116	0.25397
	64.7275	0.0811071	0.106221	0.147687	0.231343	0.211462	0.249656	0.146943	0.26814	0.292179	0.248939
	65.2625	0.083712	0.103318	0.146426	0.226351	0.202915	0.246561	0.143809	0.256133	0.283335	0.246264
	65.7974	0.0851288	0.0961447	0.148443	0.227853	0.194837	0.23958	0.151727	0.26217	0.28785	0.237208
	66.3323	0.0858758	0.0881359	0.147596	0.221816	0.194778	0.2368	0.146649	0.25845	0.293891	0.228437
	66.8673	0.0878545	0.0764357	0.150728	0.224233	0.197883	0.229493	0.144941	0.245055	0.298739	0.21497
	67.4022	0.0892156	0.0712874	0.148247	0.226489	0.195861	0.219604	0.13998	0.23439	0.301217	0.208011
	67.9371	0.0861499	0.0619372	0.143273	0.222858	0.195843	0.207742	0.13843	0.239465	0.301956	0.19755
	68.4721	0.0825797	0.0556895	0.146636	0.215808	0.191986	0.191299	0.148833	0.235976	0.310325	0.186884
	69.007	0.0806018	0.0581319	0.148719	0.207021	0.18371	0.185494	0.168775	0.228808	0.305873	0.193556
	69.542	0.0797861	0.0651296	0.149521	0.198861	0.182589	0.181431	0.181878	0.224682	0.301107	0.20835
	70.0769	0.0802035	0.0704559	0.146742	0.194323	0.186029	0.169253	0.191834	0.22206	0.304286	0.218062
	70.6118	0.0805847	0.0687812	0.146836	0.184788	0.188043	0.151769	0.197934	0.226651	0.299512	0.214704
	71.1468	0.0798184	0.0656751	0.149989	0.168918	0.183914	0.140823	0.202554	0.231297	0.299801	0.211198
	71.6817	0.0795847	0.0547402	0.147504	0.153345	0.175602	0.132924	0.213268	0.236673	0.307221	0.20957
	72.2167	0.0777916	0.0493552	0.146592	0.146453	0.168096	0.13812	0.218077	0.240819	0.31445	0.200227
	72.7516	0.0731171	0.0430913	0.143794	0.146053	0.162804	0.150019	0.203526	0.240917	0.315519	0.195897
	73.2865	0.0739541	0.0392561	0.140724	0.139989	0.164228	0.157091	0.196136	0.243865	0.305274	0.193086
	73.8215	0.0739722	0.0367172	0.135491	0.132521	0.169316	0.153231	0.1836	0.242671	0.285361	0.191993
	74.3564	0.0729148	0.0371986	0.129559	0.12208	0.175722	0.146607	0.16183	0.233898	0.252589	0.191462
	74.8913	0.073657	0.0429859	0.124817	0.117112	0.177617	0.139768	0.149814	0.232079	0.221169	0.193025
	75.4263	0.0724966	0.0400433	0.122066	0.11415	0.169938	0.138154	0.1493	0.233422	0.204691	0.192486
	75.9612	0.0717671	0.04434	0.118977	0.110938	0.160582	0.140575	0.155101	0.232368	0.204997	0.188678
	76.4962	0.0683649	0.0476202	0.115645	0.104021	0.159679	0.141425	0.161615	0.227553	0.200271	0.182292
	77.0311	0.0663347	0.0494141	0.108397	0.101707	0.157302	0.142733	0.146601	0.222908	0.195608	0.1799
	77.566	0.0622378	0.0476888	0.101194	0.106981	0.163121	0.146255	0.129065	0.198991	0.189481	0.187136
	78.101	0.0577079	0.0520764	0.102513	0.11382	0.169551	0.145106	0.123879	0.190179	0.187639	0.200722
	78.6359	0.0572805	0.0495665	0.102267	0.118001	0.17359	0.145145	0.113753	0.185491	0.187607	0.202093
	79.1708	0.0549916	0.0459192	0.101314	0.117835	0.166453	0.147031	0.10521	0.179368	0.180936	0.200371
	79.7058	0.0495961	0.0429592	0.0994755	0.115926	0.162289	0.148656	0.105701	0.183226	0.174552	0.19236
	80.2407	0.0469833	0.0393105	0.0980381	0.114341	0.158334	0.153959	0.105218	0.181122	0.163174	0.192032
	80.7757	0.0452719	0.042641	0.0971964	0.109402	0.162173	0.152081	0.106736	0.170682	0.154038	0.20061
	81.3106	0.0435337	0.0471216	0.0994101	0.110899	0.170543	0.145548	0.105245	0.163352	0.1446	0.204404
	81.8455	0.0436891	0.0489909	0.0998754	0.112814	0.171751	0.143846	0.111169	0.162823	0.137647	0.198467
	82.3805	0.0445092	0.0426688	0.0969827	0.108695	0.17367	0.144345	0.119073	0.156945	0.137831	0.190824
	82.9154	0.0473953	0.0347894	0.0943163	0.108092	0.171955	0.143183	0.121832	0.152529	0.143161	0.175408
	83.4504	0.0482375	0.037211	0.0951843	0.106716	0.169175	0.136658	0.115347	0.148033	0.144515	0.177743
	83.9853	0.0471887	0.0376148	0.100363	0.106694	0.170624	0.132681	0.107672	0.154667	0.14206	0.17397
	84.5202	0.0469246	0.0379807	0.102376	0.107117	0.165618	0.129669	0.109134	0.155367	0.133615	0.172434
	85.0552	0.0492839	0.0384189	0.0980162	0.118121	0.158777	0.125832	0.101967	0.151768	0.127266	0.180941
	85.5901	0.052457	0.0424289	0.0982478	0.123241	0.150545	0.12578	0.0959633	0.142132	0.119637	0.183068
	86.125	0.051887	0.0361121	0.0976274	0.1282	0.141765	0.124081	0.100412	0.135068	0.112601	0.179022
	86.66	0.0515716	0.0238537	0.0983701	0.135403	0.130219	0.116069	0.0974342	0.136622	0.10905	0.168922
	87.1949	0.0539981	0.021278	0.0972073	0.141317	0.121876	0.11497	0.0974161	0.14777	0.104826	0.158209
	87.7299	0.0533558	0.0257994	0.0906965	0.138636	0.115843	0.115809	0.0916174	0.160182	0.101779	0.139685
	88.2648	0.0523009	0.031381	0.0827737	0.134805	0.110894	0.114543	0.0817512	0.174084	0.0941681	0.130228
	88.7997	0.0506413	0.0315753	0.0804159	0.135273	0.10625	0.111502	0.0814382	0.1813	0.0881846	0.136156
	89.3347	0.049031	0.0244218	0.0863555	0.131911	0.104502	0.112989	0.0818432	0.176667	0.0862045	0.140335
	89.8696	0.0509638	0.0139173	0.088787	0.128331	0.109519	0.113752	0.0857683	0.170845	0.0840401	0.135933
	90.4045	0.0528264	0.0100163	0.0906996	0.124396	0.106706	0.114858	0.0917132	0.166549	0.0831959	0.135258
	90.9395	0.0535844	0.00950584	0.0864104	0.115113	0.104795	0.108734	0.0970594	0.163559	0.0854396	0.138777
	91.4744	0.0548259	0.00520232	0.0810288	0.106344	0.105534	0.106185	0.113462	0.157837	0.0900106	0.134588
	92.0094	0.0535722	0.00117172	0.0745546	0.0981984	0.10048	0.107546	0.119049	0.15399	0.0883305	0.130414
	92.5443	0.0504453	-0.00731189	0.069797	0.0915769	0.0934437	0.103156	0.124618	0.152806	0.0898522	0.126538
	93.0792	0.0500705	-0.0154088	0.0669283	0.0888411	0.0926259	0.102519	0.123847	0.147612	0.0925948	0.123017
	93.6142	0.0486219	-0.0145153	0.0659399	0.0912667	0.0919646	0.100968	0.1248	0.146322	0.0866809	0.124568
	94.1491	0.047045	-0.0142739	0.0660131	0.0862533	0.0949127	0.103904	0.12776	0.148214	0.0826253	0.122844
	94.6841	0.0459007	-0.00997101	0.0630735	0.0804702	0.101549	0.0989202	0.128378	0.146205	0.0837316	0.124013
	95.219	0.0450593	-0.013189	0.0605052	0.0800531	0.100867	0.103813	0.133817	0.137307	0.0811786	0.121588
	95.7539	0.042725	-0.0150055	0.0599084	0.0744973	0.0971668	0.110393	0.126402	0.135696	0.0780344	0.118842
	96.2889	0.0406196	-0.0176019	0.0612478	0.0701912	0.0939504	0.112293	0.115228	0.127932	0.0771657	0.113561
	96.8238	0.0376447	-0.0168701	0.0630416	0.0675055	0.0948621	0.110445	0.0892225	0.114293	0.0703485	0.107729
	97.3587	0.0357943	-0.014509	0.0632847	0.0651059	0.100754	0.102283	0.0716468	0.103756	0.0648045	0.0975737
	97.8937	0.03434	-0.013851	0.0643465	0.0600032	0.104356	0.0950976	0.0663846	0.0927435	0.0595711	0.093278
	98.4286	0.0330212	-0.00810928	0.0684241	0.0582033	0.108593	0.088932	0.0630561	0.0916252	0.0563396	0.0827236
	98.9636	0.0322153	-0.00754814	0.0730497	0.056882	0.104918	0.0826077	0.0608371	0.0949879	0.056217	0.0695766
	99.4985	0.0305377	-0.00383137	0.0744834	0.0517783	0.103338	0.0786856	0.0605651	0.0936855	0.0480032	0.0632666
	100.033	0.0301353	-0.00162654	0.0728364	0.0519128	0.103967	0.0769137	0.0574287	0.0845014	0.0410148	0.0683015
	100.568	0.0301939	-0.00391668	0.0710205	0.0530704	0.106163	0.0846322	0.0546606	0.0797759	0.0375588	0.0698503
	101.103	0.0301363	-0.00633537	0.0713717	0.0533334	0.100748	0.0819874	0.0525785	0.074815	0.033006	0.0692142
	101.638	0.0308445	-0.00584357	0.0719024	0.0534641	0.0941157	0.076758	0.0515489	0.0677286	0.0305127	0.06571
	102.173	0.030698	-0.00242132	0.0715322	0.0521657	0.0902204	0.0679706	0.0498732	0.066216	0.0278999	0.0627247
	102.708	0.0316183	-3.42833e-05	0.0721644	0.0556033	0.0806004	0.0671966	0.061452	0.0715528	0.0246158	0.0643545
	103.243	0.0340012	0.00473541	0.0717565	0.0617502	0.0697933	0.0662027	0.071188	0.0778496	0.0243188	0.0691111
	103.778	0.037815	0.00823875	0.0694706	0.0626399	0.0603409	0.0639511	0.0837739	0.0843319	0.0280363	0.0691401
	104.313	0.0415245	-0.000256101	0.0714216	0.0633973	0.0560333	0.060722	0.0992548	0.08926	0.0302299	0.0716694
	104.848	0.0445825	-0.00718797	0.0733078	0.0649939	0.0547208	0.0507598	0.10205	0.0927446	0.0330614	0.0717039
	105.383	0.047342	-0.0184931	0.0739041	0.0693113	0.0495995	0.0442036	0.106589	0.099375	0.0375347	0.0731127
	105.918	0.0475704	-0.0200579	0.0734795	0.0729258	0.0517348	0.0371256	0.104604	0.0987367	0.04769	0.0797233
	106.453	0.0453762	-0.017392	0.0752023	0.0703088	0.0608177	0.0338753	0.0965325	0.110157	0.0603234	0.0793074
	106.988	0.0439327	-0.014022	0.0762535	0.0711911	0.0641861	0.0321886	0.0839051	0.125473	0.0719735	0.0790107
	107.523	0.041534	-0.0120353	0.0730855	0.0702572	0.0660389	0.0333965	0.0863347	0.123515	0.0707702	0.075956
	108.058	0.0393262	-0.0089633	0.0691219	0.0689426	0.0742546	0.0349486	0.0821801	0.130158	0.0622262	0.0715128
	108.592	0.0378278	-0.00640954	0.0647516	0.0695349	0.0772994	0.0316676	0.0739753	0.134036	0.0574854	0.0653834
	109.127	0.0379769	-0.00383681	0.0618188	0.0642469	0.0768173	0.0280176	0.0653709	0.131731	0.053498	0.0558731
	109.662	0.037358	-0.00835724	0.0634287	0.0632035	0.0767255	0.0241274	0.0591141	0.126661	0.0494137	0.0467607
	110.197	0.0355712	-0.0130956	0.0634659	0.063947	0.0779825	0.0236261	0.0603482	0.115556	0.0473571	0.0424858
	110.732	0.033542	-0.0153945	0.066729	0.0663009	0.0769431	0.0285584	0.0576139	0.100521	0.0440249	0.0480301
	111.267	0.0317335	-0.0133611	0.0691671	0.0698701	0.0740906	0.0321496	0.0516861	0.0957653	0.0453775	0.0517032
	111.802	0.0332747	-0.0137931	0.0691329	0.0748593	0.0750397	0.0344914	0.0479012	0.0911701	0.046107	0.048616
	112.337	0.0334102	-0.0152895	0.0684247	0.0745436	0.0773808	0.0378352	0.0469101	0.0839185	0.0490358	0.0537867
	112.872	0.0310097	-0.0169697	0.067485	0.0768842	0.0773264	0.0454219	0.0471587	0.08226	0.047167	0.0517453
	113.407	0.0292275	-0.0172395	0.0679459	0.0792117	0.0793934	0.0510864	0.0493745	0.0794905	0.0402856	0.0466067
	113.942	0.0265609	-0.0104534	0.0680651	0.0776119	0.0814383	0.0540733	0.0527508	0.0759064	0.0315238	0.0442961
	114.477	0.0260448	-0.00859827	0.0670954	0.0769834	0.0791808	0.05565	0.0419145	0.070289	0.0281515	0.0442463
	115.012	0.0250265	-0.001179	0.0625296	0.0763963	0.0802969	0.0584338	0.0377914	0.0678045	0.0304754	0.0465806
	115.547	0.0229213	-5.20608e-05	0.0610961	0.0738159	0.0866094	0.0650641	0.0357159	0.0698917	0.034948	0.047885
	116.082	0.0219803	0.00607251	0.0625861	0.0702916	0.0857476	0.0716767	0.0412383	0.0736685	0.037135	0.0513215
	116.617	0.021823	0.00775035	0.0606563	0.0639448	0.0795734	0.0704652	0.0456131	0.0777742	0.0374164	0.0552511
	117.151	0.0217529	0.00667994	0.0574004	0.0541557	0.0746701	0.0692432	0.0439447	0.0752738	0.0411856	0.0572115
	117.686	0.0217535	0.00833557	0.0521434	0.0452316	0.0768413	0.0736456	0.0380673	0.0743987	0.0398061	0.0579429
	118.221	0.0213345	0.00985254	0.048476	0.0393199	0.078424	0.0771664	0.0291983	0.0747191	0.0373888	0.0557371
	118.756	0.021696	0.0125924	0.0463593	0.0370302	0.0776381	0.0710319	0.0213457	0.0747366	0.0341469	0.0518103
	119.291	0.0228791	0.00880259	0.0477225	0.0379335	0.075157	0.0586299	0.0142159	0.0717261	0.0285126	0.0509104
	119.826	0.0227179	0.00547186	0.050164	0.0439539	0.0719271	0.048112	0.0118631	0.0676821	0.0237413	0.0488188
	120.361	0.0223848	-0.00271665	0.0548664	0.0474916	0.0644697	0.0405653	0.00968505	0.066796	0.0240785	0.0442248
	120.896	0.0225768	-0.00455293	0.061524	0.0515438	0.0550449	0.035791	0.00847514	0.0723486	0.0271977	0.0395958
	121.431	0.0236974	-0.0123926	0.0688619	0.0545923	0.0488598	0.0350082	0.00497008	0.0811269	0.0339303	0.0420043
	121.966	0.0253615	-0.0226663	0.0720782	0.0591003	0.0466197	0.0360459	0.00691812	0.0827359	0.0414117	0.0493376
	122.501	0.0251941	-0.0253373	0.0731211	0.0603843	0.0485287	0.0411438	0.0142837	0.0811868	0.0434499	0.0466693
	123.036	0.0243208	-0.0229442	0.0759429	0.0615456	0.0491133	0.0471876	0.0214488	0.0779968	0.0447416	0.0444427
	123.571	0.0238097	-0.0229664	0.0740036	0.0649041	0.0545427	0.050693	0.0301454	0.0709921	0.0442701	0.0437617
	124.106	0.0225985	-0.0249019	0.0709721	0.0637035	0.0624178	0.0486281	0.0402321	0.0646813	0.037217	0.0519907
	124.641	0.0193923	-0.0311255	0.0697776	0.0596248	0.0656856	0.0460125	0.0481733	0.0635892	0.0343193	0.053281
	125.176	0.016308	-0.033701	0.0691844	0.0580026	0.0666884	0.0492217	0.0556113	0.056837	0.0361449	0.0466043
	125.71	0.0146623	-0.0350033	0.0671023	0.0546185	0.066437	0.0479262	0.0639985	0.0519594	0.0372284	0.0445103
	126.245	0.0153014	-0.0436069	0.0669758	0.0556533	0.0623014	0.037329	0.0651446	0.047981	0.0352207	0.0465498
	126.78	0.0153796	-0.0422452	0.0644232	0.0594391	0.0593047	0.0270989	0.0603956	0.0488022	0.0335619	0.0510576
	127.315	0.0145695	-0.0337373	0.0622758	0.066816	0.0553859	0.0232965	0.0533914	0.0463516	0.0333187	0.0470732
	127.85	0.0150389	-0.029433	0.0604977	0.0699837	0.0553319	0.0257282	0.0411482	0.039189	0.0332837	0.0430267
	128.385	0.0180703	-0.0251637	0.0617328	0.0724845	0.0555805	0.025839	0.0311187	0.0378003	0.0337674	0.0445993
	128.92	0.0185065	-0.0234255	0.0670836	0.0770107	0.0556544	0.0183897	0.0218384	0.0403259	0.0341366	0.0521907
	129.455	0.0194922	-0.0236479	0.0732603	0.082241	0.0577076	0.0137094	0.0181012	0.0427073	0.0332803	0.0566725
	129.99	0.0193369	-0.0245682	0.0699216	0.0882442	0.0577237	0.0119175	0.0120922	0.039835	0.0367609	0.0680095
	130.525	0.020042	-0.0244008	0.0635873	0.0892724	0.0558977	0.0108902	0.00887063	0.0434519	0.0395872	0.0754588
	131.06	0.0203275	-0.0284735	0.0597361	0.0884621	0.0578049	0.0136007	0.00547896	0.0484656	0.0391244	0.0754493
	131.595	0.0202503	-0.0300993	0.0547505	0.087219	0.0587186	0.0173539	0.00235034	0.0556409	0.0315452	0.0730459
	132.13	0.0199545	-0.0250391	0.0499249	0.0854873	0.0556894	0.0176464	0.000201792	0.0644739	0.0247622	0.0609303
	132.665	0.0195407	-0.0203357	0.0455015	0.0818956	0.0514469	0.015924	-0.000356843	0.0651432	0.0157653	0.0500328
	133.2	0.0198074	-0.0151307	0.0444573	0.0785441	0.0480264	0.0125516	0.0014229	0.0649862	0.0124833	0.0433109
	133.735	0.0182638	-0.0134833	0.0425162	0.0739776	0.0473001	0.0122647	0.00332437	0.0668166	0.0122266	0.0365189
	134.269	0.0154661	-0.0125237	0.0431209	0.0731954	0.0459963	0.011321	-0.00270422	0.0715539	0.018642	0.0295254
	134.804	0.0129859	-0.0154753	0.042204	0.076703	0.0466309	0.0124175	-0.00780172	0.0730498	0.0269651	0.0251873
	135.339	0.0122269	-0.0194346	0.0409252	0.0816762	0.0417891	0.0139935	-0.0116302	0.0685273	0.0311937	0.0209173
	135.874	0.0126716	-0.0190132	0.0419375	0.0896988	0.0377333	0.0158658	-0.00869664	0.0705829	0.0303226	0.0182296
	136.409	0.012481	-0.0206731	0.0450165	0.0928767	0.0359918	0.0166173	-0.00244889	0.0738845	0.0300566	0.0241866
	136.944	0.0125116	-0.0211188	0.0495778	0.093551	0.0374168	0.0133159	-0.00258762	0.0721653	0.0282029	0.0319018
	137.479	0.0127357	-0.025425	0.0489811	0.0941783	0.0389557	0.0116382	-0.000521414	0.0675471	0.0267951	0.0300398
	138.014	0.0114023	-0.0239585	0.0486004	0.0979658	0.0364331	0.0161905	0.000474768	0.0671297	0.0261538	0.0244989
	138.549	0.0104365	-0.0196362	0.0492501	0.0966955	0.0275725	0.0204513	0.00070825	0.0634264	0.0236553	0.0209467
	139.084	0.00964943	-0.0160461	0.0504056	0.0956996	0.0231302	0.0227212	0.00365527	0.0656153	0.0197721	0.0262585
	139.619	0.00911744	-0.0142706	0.0534988	0.0894384	0.0204893	0.0253572	0.00836675	0.0715654	0.0148771	0.0415756
	140.154	0.0110318	-0.0186759	0.0578771	0.0780162	0.0210941	0.0264069	0.0157227	0.079704	0.0171169	0.0446754
	140.689	0.0108043	-0.0236286	0.0600269	0.075993	0.0216484	0.0260718	0.0254451	0.08301	0.0186676	0.0439679
	141.224	0.0102667	-0.0284778	0.0597325	0.0684361	0.0287081	0.0275609	0.036113	0.08632	0.0221561	0.0481472
	141.759	0.0101087	-0.0305905	0.0570041	0.0650692	0.0376401	0.0268687	0.0366848	0.0947473	0.0249825	0.0444011
	142.294	0.0106979	-0.030172	0.0583881	0.0627764	0.0437864	0.0213506	0.0417195	0.0985406	0.0246934	0.0370928
	142.828	0.0120485	-0.0315138	0.0573953	0.0637529	0.0514411	0.0151859	0.0446775	0.101746	0.0238827	0.0304122
	143.363	0.0128813	-0.0343378	0.0549917	0.0648308	0.0609795	0.0102329	0.0444062	0.104445	0.0247808	0.0262701
	143.898	0.0125623	-0.0374506	0.0504429	0.0674578	0.0659628	0.00611017	0.0463948	0.105466	0.0219947	0.0221563
	144.433	0.0118864	-0.0415678	0.0497545	0.0649751	0.0658851	0.00754553	0.0421517	0.103807	0.0148702	0.0201908
	144.968	0.0108884	-0.0428534	0.048782	0.0588964	0.0730029	0.00713405	0.0394875	0.102247	0.0142879	0.0219513
	145.503	0.0104553	-0.0382232	0.0483611	0.054311	0.0786092	0.00253144	0.0421956	0.101165	0.0160621	0.0193582
	146.038	0.00917082	-0.0365041	0.0477198	0.0523476	0.0832133	0.00298553	0.0463901	0.0969376	0.0175343	0.0145086
	146.573	0.00677187	-0.032843	0.0450163	0.0505832	0.087391	0.0015173	0.0469699	0.0905921	0.0166238	0.0153212
	147.108	0.0054531	-0.0322944	0.044729	0.0523316	0.0805751	-0.00049037	0.0440675	0.0866432	0.0140245	0.0190856
	147.643	0.00553179	-0.0357762	0.0444495	0.0554092	0.0765287	0.00108564	0.0455993	0.0897754	0.0133197	0.0156909
	148.178	0.00604371	-0.0396171	0.0486432	0.0566253	0.0781287	0.00323627	0.0402671	0.0933845	0.0137807	0.00979551
	148.713	0.00500305	-0.0353919	0.047642	0.0567128	0.0811643	0.00521566	0.0289203	0.0964737	0.0149427	0.0117289
	149.248	0.00497897	-0.0365786	0.0471883	0.0559338	0.0832843	0.0101103	0.0170856	0.101162	0.0161454	0.0135126
	149.783	0.00672242	-0.0331534	0.0475652	0.0535161	0.0855115	0.0113431	0.00788296	0.0990718	0.0176397	0.0140332
	150.318	0.00664875	-0.0345763	0.0454262	0.04918	0.0872911	0.0103322	0.00195189	0.0944083	0.0154169	0.0128161
	150.853	0.00752119	-0.0390546	0.042566	0.0422035	0.0852596	0.0123316	0.000324524	0.0884293	0.0108096	0.0157551
	151.387	0.00785473	-0.0376678	0.0444231	0.0399321	0.084093	0.0149916	0.003025	0.0826253	0.00769665	0.0179245
	151.922	0.00866945	-0.0335824	0.0492311	0.0420126	0.0776415	0.0171336	-0.000262457	0.0761542	0.00388184	0.0197962
	152.457	0.00989008	-0.0256354	0.0509654	0.0415728	0.0680299	0.0182243	-0.00710968	0.0712153	0.00326796	0.0188158
	152.992	0.0133791	-0.0157146	0.0505072	0.0408486	0.0579796	0.0177465	-0.0111058	0.07184	0.0081081	0.015239
	153.527	0.012807	-0.0159502	0.0506754	0.0398797	0.0498165	0.0163875	-0.00615645	0.0728119	0.00454572	0.0131315
	154.062	0.0137985	-0.0190705	0.0483284	0.0428044	0.0461577	0.0205371	-0.00439534	0.0677069	0.00369481	0.0103283
	154.597	0.0139025	-0.0255332	0.0477306	0.0468267	0.0398782	0.0249366	-0.00165784	0.0604715	0.00538828	0.010588
	155.132	0.0139654	-0.0256872	0.0478583	0.0532109	0.033912	0.027805	-0.00281133	0.054747	0.00614963	0.01702
	155.667	0.0131876	-0.0298114	0.049218	0.0560213	0.0339791	0.0323321	-0.00252406	0.0515803	0.00266243	0.0198677
	156.202	0.0141938	-0.0305629	0.0511003	0.0539437	0.0321898	0.0333618	-0.00157265	0.0517219	0.00377113	0.0180662
	156.737	0.0152963	-0.0333294	0.0511169	0.0518078	0.0319421	0.0327493	-0.00491813	0.0553546	0.00613349	0.0133215
	157.272	0.0152561	-0.0310171	0.051353	0.0514741	0.0336816	0.0305721	-0.00721528	0.0588194	0.00632308	0.00750466
	157.807	0.0147294	-0.0281765	0.048982	0.0558747	0.0339378	0.0325365	-0.0124941	0.0608306	0.00905787	0.00745984
	158.342	0.0145347	-0.0274294	0.0468305	0.0582227	0.0327575	0.033074	-0.0147011	0.0696231	0.0127378	0.0127298
	158.877	0.0141895	-0.028621	0.0476277	0.0584631	0.0310559	0.0359701	-0.0156285	0.0770405	0.0136748	0.0197863
	159.412	0.0130015	-0.0304304	0.0474906	0.0579205	0.0320812	0.036159	-0.0057699	0.0848061	0.0100083	0.0218481
	159.947	0.0126854	-0.0332761	0.047674	0.0610025	0.0395499	0.0353885	-0.00595444	0.0891942	0.00398714	0.0241621
	160.481	0.0137904	-0.0353315	0.0476414	0.0628941	0.0464566	0.0337703	-0.00512108	0.0859624	2.1271e-05	0.0240831
	161.016	0.0128062	-0.0418466	0.0480139	0.0656343	0.0523376	0.0388736	-0.0120324	0.082752	-0.00359333	0.0204646
	161.551	0.0113386	-0.0462416	0.0484493	0.0654657	0.0594193	0.0438855	-0.0202015	0.0840885	-0.00657653	0.015919
	162.086	0.0108269	-0.0494775	0.0512713	0.0648467	0.0552565	0.0411461	-0.023421	0.0847455	-0.00741538	0.0176812
	162.621	0.0113614	-0.054172	0.0533431	0.0597915	0.0569956	0.0356828	-0.0206145	0.0911263	-0.0061022	0.0216229
	163.156	0.011514	-0.0552625	0.056741	0.0570627	0.0600756	0.0290089	-0.0220783	0.0983144	-0.00347118	0.0285991
	163.691	0.0141119	-0.0560908	0.0595932	0.0571856	0.058931	0.0226013	-0.0271373	0.100977	-0.0041891	0.0309893
	164.226	0.0161379	-0.0488313	0.0635284	0.0591283	0.0608515	0.0132988	-0.0234877	0.104647	-0.00979428	0.0305722
	164.761	0.0149609	-0.0476673	0.0633182	0.0633899	0.0655014	0.00824029	-0.0215982	0.106537	-0.0160992	0.0289673
	165.296	0.0123235	-0.0501702	0.0575042	0.0670667	0.0713135	0.00768395	-0.0161171	0.107275	-0.0205255	0.0270273
	165.831	0.0100875	-0.0533283	0.0535327	0.0765536	0.0747354	0.00996592	-0.0155071	0.113187	-0.0200676	0.0200863
	166.366	0.00803265	-0.0525973	0.0529484	0.0861672	0.0754062	0.00853397	-0.0176506	0.121431	-0.0190252	0.0176589
	166.901	0.00728693	-0.0568484	0.0519926	0.0892096	0.0750767	0.0112977	-0.0182425	0.123995	-0.0147253	0.019569
	167.436	0.00709603	-0.0570214	0.0439873	0.0846826	0.0759245	0.00896022	-0.0150923	0.129527	-0.017723	0.0228693
	167.971	0.00732222	-0.0579396	0.0384598	0.0782034	0.0747126	0.00858105	-0.0113598	0.140136	-0.0162704	0.0217634
	168.506	0.00710069	-0.0566523	0.0376938	0.0736371	0.0739497	0.0105983	-0.00733832	0.148256	-0.0159424	0.021535
	169.04	0.00670925	-0.056333	0.0386363	0.0695287	0.0683409	0.012869	-0.0107979	0.146845	-0.0172884	0.0256141
	169.575	0.00768098	-0.0558969	0.0418192	0.0886207	0.0615266	0.0156573	-0.0170575	0.139076	-0.019079	0.0289883
	170.11	0.009137	-0.0481208	0.0427655	0.0852966	0.0521932	0.0192571	-0.00921237	0.126737	-0.00315408	0.0307834
	170.645	0.0111956	-0.0441914	0.0420977	0.0854303	0.0393022	0.0215618	0.00526509	0.113813	-0.00813659	0.030627
	171.18	0.0128012	-0.042562	0.0423311	0.0888363	0.0289417	0.025074	0.00555346	0.104537	-0.0114619	0.0304616
	171.715	0.0134265	-0.0415273	0.0417766	0.0849396	0.0207356	0.0299875	0.00526326	0.103899	-0.0162563	0.0361124
	172.25	0.0128387	-0.0410388	0.0418678	0.0772002	0.0200367	0.0280129	0.00658273	0.10743	-0.0208136	0.0383505
	172.785	0.0118871	-0.0379628	0.0400719	0.0727259	0.0225609	0.025467	0.0062085	0.10843	0.00119776	0.0382467
	173.32	0.0120417	-0.0286275	0.0383683	0.0708902	0.0242767	0.0255297	0.00451345	0.109186	0.00617796	0.0343918
	173.855	0.0128123	-0.0170854	0.0389539	0.0693132	0.0293382	0.0239171	0.00203858	0.107366	0.0165062	0.030301
	174.39	0.0117482	-0.00789294	0.0389483	0.0675774	0.0359159	0.0170137	-0.00538716	0.104924	0.0128635	0.0322953
	174.925	0.0128579	-0.00420001	0.0380955	0.0633183	0.0387092	0.0111194	-0.00989238	0.102854	0.00489132	0.0345816
	175.46	0.0154251	-0.000996327	0.0368073	0.0625791	0.0398944	0.0111364	-0.00612388	0.0990176	-0.0103385	0.0366298
	175.995	0.0168244	-0.00664861	0.0369988	0.0610594	0.039233	0.00922304	0.000267644	0.0972289	-0.0102684	0.0399425
	176.53	0.0173929	-0.015009	0.039156	0.062237	0.0394202	0.0109067	0.00390126	0.0951481	-0.00589316	0.0358511
	177.065	0.017742	-0.0182118	0.0390559	0.0644611	0.0422393	0.0125557	0.00782356	0.0942805	-0.00702924	0.0349699
	177.599	0.0189789	-0.0157886	0.0430714	0.062276	0.0439557	0.0125082	0.00679464	0.0951958	-0.00718479	0.0357908
	178.134	0.0203264	-0.0112534	0.0420303	0.0616621	0.0472373	0.0119501	0.00658384	0.0936791	-0.0189039	0.0423255
	178.669	0.0209657	-0.00540599	0.0479659	0.0587293	0.0483518	0.00927531	0.0115311	0.0963745	-0.0266021	0.0433132
	179.204	0.020921	0.000110294	0.048804	0.0566217	0.0490547	0.0051283	0.0204079	0.102692	-0.0299705	0.0438482
	179.739	0.0164402	0.000859571	0.0493748	0.053216	0.046381	0.000993981	0.0241071	0.108405	-0.0207494	0.0431857
	180.274	0.0154151	0.00491632	0.0492153	0.0516902	0.0446423	-0.00350335	0.0266706	0.10998	-0.0128419	0.0439667
	180.809	0.013206	0.0108481	0.0503326	0.0510131	0.0414531	-0.00654505	0.0305628	0.108485	0.000480632	0.0420626
	181.344	0.0129862	0.0122329	0.0580859	0.0547681	0.0366713	-0.00505148	0.0355009	0.110144	0.00742831	0.043592
	181.879	0.0114493	0.0118185	0.0612151	0.0639223	0.0328363	-0.00663416	0.0359029	0.110669	0.0112335	0.0437128
	182.414	0.0118386	0.0134386	0.0618472	0.0716062	0.0300346	-0.00859415	0.0396132	0.121434	0.010983	0.0435574
	182.949	0.0110244	0.0144967	0.0639888	0.0717153	0.0305136	-0.00844227	0.0429505	0.125456	0.0148252	0.0419425
	183.484	0.0109789	0.00927858	0.0656595	0.0738074	0.032138	-0.00442772	0.0390068	0.130124	0.0209979	0.0429214
	184.019	0.0126224	0.000133623	0.0645768	0.0757625	0.033447	-0.000962802	0.0360354	0.133453	0.0237422	0.0426021
	184.554	0.0117313	-0.00778166	0.0673462	0.0765024	0.037436	-0.00126051	0.0337016	0.138216	0.0278917	0.0429964
	185.089	0.00956138	-0.00853506	0.0730623	0.0737536	0.0399526	-0.00233095	0.0304909	0.138351	0.0288161	0.0433697
	185.624	0.00630708	-0.00822237	0.0735351	0.0705879	0.0436549	0.00334855	0.0270315	0.133492	0.0263606	0.0441467
	186.158	0.00475312	-0.00827459	0.0700864	0.0722569	0.047645	0.00748664	0.0225242	0.136015	0.0222382	0.0390632
	186.693	0.00460338	-0.0109776	0.0676698	0.074788	0.0504758	0.00846416	0.0233591	0.140008	0.0205065	0.0339408
	187.228	0.00502445	-0.0147393	0.0672526	0.0757304	0.0502402	0.0137509	0.0222267	0.140352	0.0200377	0.035393
	187.763	0.00582523	-0.0141435	0.0667466	0.0764698	0.0541678	0.0163303	0.0198245	0.136048	0.0178218	0.0357873
	188.298	0.00592451	-0.0188019	0.0638083	0.0804631	0.0542353	0.0206256	0.0249655	0.131774	0.0237068	0.0350339
	188.833	0.00475484	-0.0224136	0.0591999	0.0856043	0.0519688	0.026047	0.0320456	0.128741	0.0222775	0.036116
	189.368	0.00253367	-0.0162339	0.051819	0.0903466	0.0489054	0.0280531	0.0401566	0.131709	0.0167016	0.0388912
	189.903	0.00353177	-0.0149268	0.0496412	0.0896759	0.0487085	0.0275151	0.04099	0.131913	0.0129191	0.0325329
	190.438	0.00597451	-0.0193042	0.0462744	0.0857818	0.0474062	0.0257942	0.0397271	0.135658	0.00263118	0.0282878
	190.973	0.00900161	-0.0178959	0.0471111	0.0867616	0.0488301	0.023808	0.0390406	0.125556	-0.00803064	0.0276162
	191.508	0.0103915	-0.0139789	0.0486122	0.086269	0.0532609	0.023022	0.0411994	0.117335	-0.0104797	0.0275534
	192.043	0.0108935	-0.0114943	0.0516069	0.0835908	0.0571943	0.0236195	0.0421445	0.110963	-0.0155724	0.0260338
	192.578	0.0105761	-0.00930113	0.055433	0.0784023	0.0567786	0.0229414	0.0364785	0.105352	-0.0125179	0.0328705
	193.113	0.0099067	-0.0278981	0.0543596	0.0739625	0.053862	0.0204006	0.0358668	0.105235	-0.0120483	0.040647
	193.648	0.0085208	-0.0293199	0.0562904	0.0673648	0.0509181	0.0204704	0.0325748	0.10854	-0.015497	0.0466327
	194.183	0.00806492	-0.0269291	0.056784	0.0671267	0.0502858	0.021794	0.0306869	0.112397	-0.0190418	0.0483226
	194.717	0.00757358	-0.0279489	0.0518081	0.073829	0.0492404	0.022409	0.0292861	0.108706	-0.012749	0.051615
	195.252	0.00794101	-0.0267082	0.0463679	0.0768379	0.0457464	0.0209771	0.026999	0.105402	-0.00707098	0.0509857
	195.787	0.00755466	-0.0196505	0.0469478	0.0795132	0.0413319	0.0220412	0.0225191	0.0974623	-0.00405226	0.0526261
	196.322	0.00750537	-0.0159034	0.0476339	0.0821927	0.0379699	0.0193815	0.0226565	0.088069	-0.00188127	0.0597597
	196.857	0.00689619	-0.0128414	0.0511005	0.0888245	0.0351726	0.0160558	0.0246414	0.0851478	-0.000692438	0.0717391
	197.392	0.00564182	-0.0153661	0.0544645	0.064746	0.0318215	0.0100004	0.0246013	0.083602	0.00400232	0.0820763
	197.927	0.00438953	-0.0197703	0.0527047	0.0596997	0.0318417	0.00201251	0.0215407	0.0786661	0.00875433	0.0891812
	198.462	0.00383895	-0.0233629	0.0515224	0.0544109	0.032789	-0.00358606	0.0237556	0.0757906	0.0118135	0.0913828
	198.997	0.002665	-0.027967	0.052455	0.0605449	0.0308197	-0.0015475	0.0264363	0.0764991	0.00911563	0.0888005
	199.532	-0.00010573	-0.0291237	0.0521158	0.0664483	0.0270365	8.5227e-05	0.028013	0.0759178	0.00565617	0.0780268
	200.067	-0.00105203	-0.0277754	0.0515138	0.0684052	0.0275704	0.00558854	0.0317213	0.0773898	0.00120243	0.0750366

## Sheet: acvr1ba dorsal
	Figure 4 - figure supplement 1
	acvr1b-a-/-, dorsal view
		Background-subtracted and normalized intensity in acvr1b-a-/- embryos, dorsal view
	Distance (µm)	Embryo
		1	2	3	4	5	6	7	8	9	10
	0	0.743405	1.66381	1.14449	1.09141	1.11795	1.21471	2.33208	2.97745	2.60332	2.8458
	0.534938	0.750715	1.5765	1.19836	1.09722	1.14779	1.25687	2.33819	2.96796	2.55995	2.7485
	1.06988	0.777849	1.47406	1.2303	1.09814	1.16422	1.26875	2.31201	2.94806	2.46762	2.77238
	1.60481	0.80542	1.36772	1.24478	1.0949	1.16984	1.30537	2.2995	3.07687	2.36207	2.83291
	2.13975	0.806175	1.37579	1.27557	1.08251	1.17904	1.28603	2.20002	3.12649	2.20372	2.86501
	2.67469	0.790996	1.39904	1.29666	1.10123	1.19895	1.24719	2.15205	3.12883	2.08552	2.92505
	3.20963	0.764921	1.42916	1.30531	1.09551	1.20041	1.25983	2.04903	3.07105	2.04839	2.91695
	3.74457	0.742267	1.43231	1.29789	1.11642	1.20715	1.33016	1.94452	2.95937	2.05842	2.97261
	4.27951	0.696146	1.39436	1.28742	1.11391	1.20067	1.29247	1.84429	2.84217	2.08659	3.00243
	4.81444	0.672774	1.33244	1.24177	1.07985	1.16081	1.23413	1.68547	2.7979	2.11231	3.00126
	5.34938	0.646629	1.29794	1.18468	1.05703	1.12086	1.13459	1.53925	2.85704	2.14527	3.00879
	5.88432	0.636276	1.28512	1.20505	1.03886	1.12196	1.06289	1.52478	2.87789	2.19607	3.01901
	6.41926	0.639532	1.27758	1.19247	1.02326	1.10787	1.00573	1.5556	2.83209	2.24377	3.03614
	6.9542	0.637084	1.23743	1.1843	1.01707	1.10069	1.05198	1.56794	2.81524	2.31582	3.011
	7.48913	0.623499	1.16942	1.16563	0.97166	1.06865	1.16583	1.63423	2.79079	2.29226	2.94908
	8.02407	0.608078	1.1153	1.16189	0.96646	1.06417	1.22367	1.70472	2.69943	2.28262	2.87971
	8.55901	0.590769	1.06314	1.12695	0.977608	1.05228	1.27618	1.72425	2.69921	2.37796	2.76646
	9.09395	0.565195	1.07137	1.10088	1.02953	1.06521	1.28143	1.71679	2.62559	2.42368	2.70982
	9.62889	0.551742	1.07756	1.0669	1.08378	1.07534	1.28989	1.76271	2.65048	2.40865	2.73844
	10.1638	0.542692	1.01245	1.0212	1.11288	1.06704	1.27093	1.82006	2.7029	2.21854	2.73801
	10.6988	0.527799	1.02751	0.979863	1.12093	1.0504	1.17674	1.88406	2.72786	2.13252	2.70875
	11.2337	0.510678	1.01891	0.969781	1.12774	1.04876	1.14102	1.91987	2.76756	2.13097	2.66676
	11.7686	0.496159	1.00887	0.977844	1.12808	1.05296	1.10136	1.92698	2.81366	2.07391	2.60082
	12.3036	0.483821	1.02451	0.971995	1.1421	1.05705	1.05373	1.90579	2.878	2.10278	2.56692
	12.8385	0.48091	1.05039	1.00731	1.17489	1.0911	1.02232	1.88919	2.91324	2.18179	2.56213
	13.3735	0.482118	1.08869	1.05144	1.19388	1.12266	1.00527	1.86692	2.87797	2.21187	2.54449
	13.9084	0.480127	1.1327	1.09056	1.18664	1.1386	1.0331	1.84893	2.89992	2.26313	2.53519
	14.4433	0.467146	1.13428	1.10237	1.13726	1.11981	1.11761	1.77484	2.88642	2.31037	2.43091
	14.9783	0.438485	1.14351	1.12893	1.16224	1.14558	1.21076	1.69931	2.92465	2.40798	2.2778
	15.5132	0.420477	1.0789	1.13462	1.17556	1.15509	1.21733	1.59422	2.89207	2.43876	2.10143
	16.0481	0.417356	1.00462	1.10996	1.15006	1.13001	1.18944	1.56833	2.77248	2.41883	2.05233
	16.5831	0.402671	0.917098	1.07806	1.15665	1.11736	1.17599	1.55093	2.71966	2.43246	2.05576
	17.118	0.377717	0.83071	1.04675	1.15084	1.0988	1.14512	1.47915	2.74578	2.46773	2.14022
	17.653	0.349652	0.77703	1.01222	1.07561	1.04391	1.19408	1.41222	2.76407	2.62681	2.16467
	18.1879	0.324195	0.724173	0.971045	1.02392	0.997483	1.23613	1.30157	2.81586	2.69018	2.17874
	18.7228	0.315165	0.703551	0.938738	0.972231	0.955484	1.27272	1.24626	2.82639	2.76627	2.16567
	19.2578	0.324787	0.717833	0.923018	0.941677	0.932347	1.28755	1.21882	2.89967	2.88588	2.14447
	19.7927	0.320349	0.721436	0.900075	0.895077	0.897576	1.28256	1.25285	2.91349	3.03138	2.06906
	20.3276	0.315481	0.694169	0.868891	0.872471	0.870681	1.23268	1.26207	2.87142	3.13984	2.0341
	20.8626	0.30867	0.674375	0.83858	0.859018	0.848799	1.21491	1.2724	2.80788	3.22871	2.03417
	21.3975	0.316374	0.669617	0.852155	0.852829	0.852492	1.14897	1.27921	2.80718	3.23944	1.98539
	21.9325	0.335888	0.666508	0.873915	0.852525	0.86322	1.15525	1.26392	2.74081	3.28457	1.96491
	22.4674	0.370803	0.694463	0.887684	0.85315	0.870417	1.18032	1.21134	2.8303	3.32327	1.96247
	23.0023	0.395302	0.762385	0.894465	0.873597	0.884031	1.17056	1.19957	2.872	3.26846	1.96276
	23.5373	0.420228	0.81678	0.9019	0.910567	0.906234	1.17203	1.22835	2.92856	3.14578	1.95474
	24.0722	0.431509	0.848846	0.917876	0.997062	0.957469	1.13862	1.23318	2.95908	3.20637	1.94707
	24.6072	0.449524	0.844283	0.929962	1.0626	0.996282	1.10058	1.28383	2.98875	3.21498	1.96854
	25.1421	0.447947	0.843531	0.936802	1.12182	1.02931	1.05406	1.34986	3.04058	3.25142	1.98598
	25.677	0.419665	0.839804	0.93659	1.16777	1.05218	1.01318	1.3695	2.98007	3.24879	2.01645
	26.212	0.405989	0.828616	0.916107	1.19103	1.05357	1.0097	1.33559	2.9267	3.2207	2.07139
	26.7469	0.397381	0.797477	0.910309	1.19749	1.0539	0.964595	1.29183	2.90877	3.20525	2.07776
	27.2818	0.392253	0.755826	0.921189	1.22014	1.07067	0.948661	1.2687	2.86344	3.23551	2.14625
	27.8168	0.405699	0.808945	0.956098	1.21866	1.08738	0.948084	1.20321	2.78625	3.21198	2.16093
	28.3517	0.42297	0.87083	1.01531	1.21214	1.11373	0.979596	1.18962	2.67303	3.19517	2.10957
	28.8867	0.425108	0.91546	1.0668	1.20502	1.13591	1.08668	1.16806	2.64949	3.26405	2.00965
	29.4216	0.42551	0.975484	1.11198	1.16359	1.13778	1.1636	1.15612	2.55668	3.25673	1.9064
	29.9565	0.415047	0.995344	1.14988	1.10345	1.12666	1.11119	1.18916	2.50775	3.25075	1.82854
	30.4915	0.409273	1.01077	1.15701	1.04255	1.09978	1.14102	1.23084	2.44571	3.15134	1.7847
	31.0264	0.398056	1.01005	1.14689	0.994007	1.07045	1.18247	1.26279	2.45916	3.07304	1.74457
	31.5614	0.365939	0.983517	1.11197	0.961514	1.03674	1.27911	1.26376	2.50005	3.05531	1.62486
	32.0963	0.342108	0.92138	1.04026	0.933384	0.986823	1.3055	1.25316	2.47699	3.0576	1.60967
	32.6312	0.325268	0.826337	0.96253	0.907131	0.934831	1.26844	1.2046	2.46574	3.02052	1.65142
	33.1662	0.317955	0.769838	0.878773	0.881151	0.879962	1.25635	1.2034	2.46498	2.97114	1.76383
	33.7011	0.330007	0.746137	0.802739	0.829304	0.816022	1.26825	1.12095	2.49164	2.93694	1.75898
	34.236	0.324677	0.712175	0.732159	0.746369	0.739264	1.23671	1.10497	2.47109	2.89028	1.74477
	34.771	0.32321	0.659187	0.683562	0.658024	0.670793	1.24109	1.10046	2.47584	2.83067	1.68935
	35.3059	0.306454	0.615918	0.655179	0.628805	0.641992	1.19751	1.1093	2.53531	2.78282	1.62157
	35.8409	0.284943	0.593096	0.635451	0.615083	0.625267	1.13089	1.08774	2.58079	2.65919	1.60715
	36.3758	0.270435	0.600592	0.611613	0.616164	0.613888	1.03701	1.08913	2.60511	2.63786	1.6516
	36.9107	0.256566	0.589491	0.62577	0.649912	0.637841	0.984917	1.07431	2.50341	2.5281	1.69633
	37.4457	0.242934	0.58177	0.655569	0.704067	0.679818	0.947059	1.03629	2.4587	2.46482	1.6769
	37.9806	0.230474	0.589257	0.68914	0.749357	0.719249	0.96652	1.01613	2.40646	2.40209	1.65244
	38.5155	0.223411	0.579082	0.722691	0.789062	0.755876	0.988021	1.00557	2.43621	2.25046	1.6309
	39.0505	0.229369	0.578579	0.738413	0.845724	0.792068	1.04856	0.985338	2.48724	2.25064	1.58222
	39.5854	0.226204	0.589483	0.746733	0.903787	0.82526	1.08593	0.969291	2.5196	2.36962	1.47579
	40.1204	0.223033	0.630858	0.744067	0.923545	0.833806	1.12677	0.971764	2.50752	2.43047	1.4539
	40.6553	0.231894	0.665431	0.722684	0.94508	0.833882	1.16274	0.945932	2.45366	2.49612	1.41945
	41.1902	0.235368	0.679591	0.686515	0.998419	0.842467	1.1111	0.922972	2.42134	2.4914	1.4405
	41.7252	0.239251	0.668741	0.680322	0.993768	0.837045	1.07988	0.886544	2.34571	2.69377	1.40426
	42.2601	0.23054	0.664295	0.679551	0.992839	0.836195	1.04004	0.888181	2.282	2.66798	1.40929
	42.7951	0.232415	0.654182	0.696342	0.94621	0.821276	1.02061	0.872153	2.2633	2.69217	1.36839
	43.33	0.225914	0.647059	0.737595	0.87024	0.803918	1.00032	0.858983	2.17745	2.70547	1.32265
	43.8649	0.223493	0.630144	0.770833	0.783917	0.777375	0.979743	0.866631	2.09094	2.66975	1.32346
	44.3999	0.219828	0.631067	0.773329	0.69496	0.734145	0.954753	0.870203	1.89431	2.65931	1.30392
	44.9348	0.21569	0.593795	0.761906	0.640819	0.701363	0.938865	0.85182	1.81841	2.63777	1.30061
	45.4697	0.215152	0.546488	0.741776	0.634554	0.688165	0.904391	0.829757	1.728	2.67487	1.267
	46.0047	0.210643	0.499096	0.733114	0.633299	0.683207	0.936651	0.823026	1.71407	2.71257	1.25566
	46.5396	0.208065	0.469809	0.719308	0.651837	0.685572	0.994781	0.835584	1.69288	2.7465	1.24732
	47.0746	0.202062	0.47571	0.711153	0.737256	0.724204	1.04136	0.831359	1.74516	2.69753	1.26694
	47.6095	0.19304	0.486143	0.710908	0.832444	0.771676	1.07469	0.817515	1.7429	2.6003	1.32675
	48.1444	0.183784	0.485358	0.735586	0.898179	0.816883	1.10251	0.772896	1.75122	2.53108	1.38908
	48.6794	0.180981	0.463631	0.791918	0.968603	0.88026	1.15777	0.73945	1.74536	2.44347	1.37018
	49.2143	0.184242	0.525821	0.859758	1.01133	0.935544	1.18276	0.741115	1.68305	2.35108	1.24912
	49.7492	0.187466	0.573417	0.922774	1.05121	0.986991	1.22354	0.754192	1.63898	2.3067	1.13096
	50.2842	0.211143	0.599671	0.982206	1.08155	1.03188	1.289	0.779155	1.55959	2.32238	1.08105
	50.8191	0.218836	0.642358	1.00282	1.08918	1.046	1.31363	0.797586	1.50916	2.26285	1.02279
	51.3541	0.222303	0.674897	1.02229	1.08309	1.05269	1.33395	0.815763	1.52328	2.17891	0.982621
	51.889	0.2245	0.698285	1.02947	1.0784	1.05394	1.3609	0.824795	1.53143	2.16601	0.947988
	52.4239	0.216943	0.730041	0.989061	1.03981	1.01444	1.39386	0.824384	1.54176	2.22583	0.925637
	52.9589	0.220205	0.774067	0.919773	0.990472	0.955123	1.44658	0.807946	1.57954	2.30247	0.915434
	53.4938	0.243332	0.795457	0.874541	0.934667	0.904604	1.4542	0.78519	1.59906	2.37573	0.958861
	54.0288	0.25748	0.772174	0.832484	0.854701	0.843593	1.45758	0.748861	1.60975	2.41429	1.00168
	54.5637	0.265173	0.720402	0.798472	0.778241	0.788357	1.43597	0.706025	1.56624	2.40119	1.01508
	55.0986	0.272353	0.693687	0.759127	0.730494	0.74481	1.42297	0.672352	1.51961	2.33405	1.05275
	55.6336	0.283237	0.706947	0.7218	0.69598	0.70889	1.41199	0.653932	1.45581	2.32047	1.10474
	56.1685	0.289158	0.744953	0.684055	0.649145	0.6666	1.37793	0.662353	1.38269	2.27834	1.07663
	56.7034	0.291375	0.762762	0.648079	0.629804	0.638942	1.348	0.686493	1.29752	2.25987	1.02503
	57.2384	0.293682	0.799103	0.595615	0.638034	0.616825	1.29673	0.696251	1.23078	2.20225	0.985269
	57.7733	0.297099	0.839667	0.567591	0.671052	0.619322	1.24117	0.666906	1.18127	2.24075	0.970212
	58.3083	0.293367	0.88518	0.574848	0.702778	0.638813	1.22123	0.65436	1.12893	2.22005	0.94349
	58.8432	0.289439	0.921487	0.609725	0.690912	0.650319	1.21406	0.654352	1.06924	2.18947	0.943981
	59.3781	0.290123	0.950601	0.639404	0.651714	0.645559	1.13121	0.673064	1.06493	2.07771	0.969636
	59.9131	0.288318	0.930249	0.650885	0.655746	0.653315	1.03079	0.689483	1.10477	1.9305	0.999309
	60.448	0.28454	0.896353	0.68288	0.692217	0.687548	0.947454	0.665849	1.14762	1.81098	1.04402
	60.9829	0.270208	0.863049	0.68956	0.717344	0.703452	0.878587	0.624487	1.16104	1.69163	1.08498
	61.5179	0.248817	0.854804	0.639913	0.708891	0.674402	0.865203	0.608862	1.16346	1.62653	1.05306
	62.0528	0.233964	0.868836	0.593471	0.692295	0.642883	0.888858	0.615682	1.15902	1.62886	0.998183
	62.5878	0.227412	0.845032	0.573626	0.686325	0.629975	0.866456	0.601495	1.21452	1.7302	0.921049
	63.1227	0.227552	0.771989	0.567621	0.673188	0.620404	0.822697	0.585351	1.28574	1.80047	0.846102
	63.6576	0.22007	0.704264	0.56155	0.649516	0.605533	0.785079	0.562192	1.37484	1.8569	0.793169
	64.1926	0.211704	0.626988	0.538294	0.610437	0.574366	0.737795	0.532729	1.35032	1.8988	0.770237
	64.7275	0.214571	0.563005	0.499388	0.564247	0.531817	0.696709	0.533565	1.31044	1.80951	0.777472
	65.2625	0.223572	0.543181	0.450111	0.537911	0.494011	0.699	0.543649	1.31271	1.71176	0.801378
	65.7974	0.232353	0.527347	0.412161	0.545771	0.478966	0.700675	0.529868	1.30117	1.59783	0.801633
	66.3323	0.248422	0.501473	0.38259	0.534822	0.458706	0.686679	0.526553	1.25204	1.46259	0.821579
	66.8673	0.255757	0.496674	0.356165	0.522566	0.439366	0.680729	0.544358	1.28288	1.43118	0.864767
	67.4022	0.257945	0.514655	0.347889	0.506063	0.426976	0.671777	0.560814	1.39142	1.45341	0.878822
	67.9371	0.257205	0.564314	0.345703	0.473961	0.409832	0.668877	0.554191	1.5252	1.46966	0.895682
	68.4721	0.255925	0.602753	0.326463	0.447523	0.386993	0.667478	0.555565	1.58802	1.53536	0.915994
	69.007	0.246156	0.651686	0.314687	0.440953	0.37782	0.645771	0.527305	1.64329	1.61576	0.925317
	69.542	0.246129	0.677868	0.302026	0.450332	0.376179	0.643135	0.510744	1.73152	1.64616	0.90911
	70.0769	0.239423	0.695317	0.308787	0.463562	0.386175	0.630407	0.483481	1.79255	1.6794	0.900013
	70.6118	0.226273	0.699353	0.30396	0.471296	0.387628	0.632741	0.486424	1.77861	1.69478	0.845478
	71.1468	0.21457	0.690382	0.290516	0.473669	0.382092	0.627266	0.48856	1.65153	1.71683	0.844081
	71.6817	0.204838	0.675661	0.291857	0.457777	0.374817	0.61721	0.481046	1.5619	1.66528	0.893399
	72.2167	0.206291	0.673267	0.303028	0.446659	0.374843	0.605179	0.454855	1.46826	1.57121	0.911437
	72.7516	0.206665	0.68283	0.304175	0.431169	0.367672	0.587066	0.437465	1.40687	1.41836	0.91964
	73.2865	0.213334	0.675772	0.300277	0.425461	0.362869	0.58437	0.443508	1.41322	1.29141	0.916564
	73.8215	0.211753	0.66232	0.307974	0.432304	0.370139	0.582453	0.454779	1.33435	1.20363	0.913907
	74.3564	0.219326	0.651194	0.321444	0.446667	0.384055	0.581929	0.459877	1.26327	1.152	0.88964
	74.8913	0.227183	0.641824	0.342084	0.461352	0.401718	0.57281	0.469814	1.20474	1.08977	0.869948
	75.4263	0.229184	0.573957	0.375537	0.484436	0.429986	0.569503	0.476226	1.17957	1.03648	0.846333
	75.9612	0.230775	0.516152	0.405475	0.517006	0.46124	0.59832	0.485187	1.1503	0.898463	0.805387
	76.4962	0.236956	0.46906	0.418667	0.55945	0.489058	0.623829	0.510959	1.16331	0.727022	0.788879
	77.0311	0.238602	0.449059	0.426004	0.589868	0.507936	0.629691	0.53985	1.15043	0.622588	0.757118
	77.566	0.242131	0.459898	0.441809	0.604085	0.522947	0.650805	0.565447	1.15284	0.59327	0.729371
	78.101	0.235848	0.491347	0.462268	0.598367	0.530317	0.668688	0.574708	1.14794	0.588862	0.733473
	78.6359	0.231424	0.502747	0.482303	0.579047	0.530675	0.690455	0.591928	1.15122	0.644917	0.673803
	79.1708	0.233555	0.549336	0.489811	0.563698	0.526755	0.699266	0.583466	1.16384	0.710079	0.635317
	79.7058	0.238508	0.552044	0.468548	0.549736	0.509142	0.710498	0.570936	1.15099	0.781461	0.607117
	80.2407	0.241622	0.54499	0.449866	0.527906	0.488886	0.729031	0.55461	1.14147	0.850639	0.611359
	80.7757	0.250839	0.565974	0.445846	0.489262	0.467554	0.74635	0.535984	1.16875	0.916606	0.62114
	81.3106	0.260029	0.598877	0.452047	0.454245	0.453146	0.764893	0.522011	1.17355	0.933184	0.60943
	81.8455	0.269528	0.618414	0.466153	0.469032	0.467592	0.786474	0.503092	1.17653	0.959074	0.640873
	82.3805	0.277341	0.623933	0.479201	0.496322	0.487762	0.810845	0.465396	1.18225	0.968624	0.661349
	82.9154	0.266176	0.585932	0.457816	0.524123	0.49097	0.805459	0.436824	1.18881	1.01208	0.678196
	83.4504	0.254989	0.587318	0.423999	0.52071	0.472354	0.785015	0.410576	1.17878	1.06047	0.687971
	83.9853	0.234433	0.577309	0.38955	0.50957	0.44956	0.781032	0.38664	1.16356	1.08861	0.68981
	84.5202	0.216333	0.553931	0.33642	0.498161	0.41729	0.759834	0.360185	1.14088	1.13776	0.675586
	85.0552	0.201856	0.556866	0.2943	0.479815	0.387057	0.73809	0.364427	1.087	1.08231	0.664028
	85.5901	0.192719	0.578282	0.258651	0.479185	0.368918	0.742611	0.366029	1.02902	0.977495	0.662322
	86.125	0.18718	0.592052	0.236856	0.472528	0.354692	0.695751	0.364437	0.952077	0.889897	0.646997
	86.66	0.182009	0.598906	0.228114	0.433447	0.330781	0.63487	0.361704	0.908923	0.782469	0.63525
	87.1949	0.179796	0.667459	0.22718	0.405697	0.316439	0.537404	0.370927	0.880495	0.633594	0.645358
	87.7299	0.182271	0.653348	0.226811	0.372746	0.299779	0.459992	0.372083	0.956415	0.544662	0.674349
	88.2648	0.197423	0.596365	0.221574	0.368249	0.294912	0.462581	0.372421	0.959883	0.468531	0.697688
	88.7997	0.209182	0.569733	0.215996	0.351995	0.283996	0.439765	0.3733	0.957628	0.52746	0.71224
	89.3347	0.211289	0.600395	0.21583	0.345782	0.280806	0.434523	0.360629	0.970573	0.5184	0.698966
	89.8696	0.210233	0.609886	0.22518	0.350576	0.287878	0.393404	0.347415	0.969766	0.490051	0.6611
	90.4045	0.207119	0.618153	0.230472	0.355912	0.293192	0.405899	0.327654	0.989147	0.540778	0.614582
	90.9395	0.2086	0.607909	0.232917	0.349806	0.291361	0.42722	0.309657	0.97954	0.556065	0.60624
	91.4744	0.207895	0.639584	0.233192	0.34166	0.287426	0.450149	0.304284	0.986947	0.539714	0.550192
	92.0094	0.203147	0.654221	0.235022	0.339786	0.287404	0.436491	0.307955	0.948679	0.535112	0.526771
	92.5443	0.195935	0.672092	0.242158	0.326354	0.284256	0.420358	0.318972	0.958473	0.514382	0.529825
	93.0792	0.18616	0.685421	0.261886	0.304897	0.283392	0.409567	0.337985	1.00239	0.499111	0.535102
	93.6142	0.171992	0.676666	0.25442	0.304033	0.279226	0.409482	0.343058	1.04375	0.467351	0.557056
	94.1491	0.158037	0.656603	0.260379	0.312036	0.286208	0.398248	0.352784	1.06767	0.452561	0.574725
	94.6841	0.14968	0.595637	0.239418	0.326181	0.2828	0.396935	0.390987	1.10705	0.421235	0.573388
	95.219	0.140167	0.536726	0.223341	0.321994	0.272668	0.397332	0.418869	1.11294	0.41458	0.562891
	95.7539	0.13688	0.518621	0.208178	0.300539	0.254359	0.407031	0.432708	1.11571	0.396625	0.599272
	96.2889	0.127863	0.544907	0.202426	0.29628	0.249353	0.402842	0.429851	1.12617	0.393393	0.649783
	96.8238	0.127892	0.542471	0.191134	0.28023	0.235682	0.395305	0.460499	1.10757	0.37684	0.68443
	97.3587	0.131718	0.508745	0.19453	0.270455	0.232492	0.378202	0.475327	1.07063	0.355246	0.703828
	97.8937	0.137661	0.484215	0.181634	0.269519	0.225576	0.362481	0.485224	1.0067	0.314464	0.676061
	98.4286	0.144862	0.491626	0.171298	0.272528	0.221913	0.349108	0.477985	0.977599	0.28657	0.646093
	98.9636	0.150981	0.477438	0.163983	0.271784	0.217883	0.345782	0.463291	0.923875	0.275478	0.597323
	99.4985	0.150961	0.450256	0.155046	0.269942	0.212494	0.350762	0.449061	0.920882	0.248237	0.538459
	100.033	0.148852	0.440631	0.148256	0.259847	0.204051	0.333841	0.433422	0.93686	0.198822	0.511443
	100.568	0.144924	0.426323	0.13271	0.254735	0.193722	0.316074	0.393439	0.921291	0.176125	0.493374
	101.103	0.14367	0.448372	0.124399	0.251036	0.187718	0.366093	0.356194	0.850905	0.187553	0.483612
	101.638	0.143818	0.471177	0.11468	0.248111	0.181396	0.394228	0.299976	0.789127	0.203663	0.48332
	102.173	0.141874	0.496597	0.112115	0.254332	0.183224	0.377631	0.278626	0.814774	0.211669	0.46876
	102.708	0.141228	0.501151	0.113587	0.258006	0.185797	0.364431	0.267945	0.837104	0.21774	0.440724
	103.243	0.138977	0.515427	0.118762	0.246606	0.182684	0.356699	0.267015	0.837423	0.221119	0.425176
	103.778	0.137085	0.519661	0.138425	0.236518	0.187472	0.344817	0.253238	0.814952	0.220621	0.407511
	104.313	0.134865	0.531855	0.157186	0.229143	0.193165	0.345529	0.242833	0.798893	0.203428	0.395461
	104.848	0.126785	0.555119	0.174488	0.233256	0.203872	0.334717	0.24068	0.802143	0.20523	0.407366
	105.383	0.115862	0.586898	0.185582	0.237142	0.211362	0.326941	0.249959	0.786786	0.207832	0.411359
	105.918	0.109551	0.586267	0.188759	0.239701	0.21423	0.340633	0.256547	0.731831	0.210838	0.418347
	106.453	0.109932	0.559609	0.18695	0.225537	0.206243	0.352845	0.259289	0.694782	0.202087	0.417515
	106.988	0.112124	0.545778	0.182864	0.208966	0.195915	0.367292	0.27725	0.687052	0.1894	0.419058
	107.523	0.107901	0.545882	0.184113	0.204761	0.194437	0.39202	0.276574	0.719593	0.172723	0.37897
	108.058	0.102183	0.555304	0.168028	0.20422	0.186124	0.403976	0.26069	0.764027	0.167813	0.363408
	108.592	0.0971949	0.539152	0.154122	0.203415	0.178769	0.381702	0.246153	0.80379	0.160856	0.350718
	109.127	0.0977629	0.535454	0.152367	0.213137	0.182752	0.399292	0.229271	0.875838	0.164105	0.363792
	109.662	0.0998744	0.545791	0.144917	0.223945	0.184431	0.422892	0.200198	0.878707	0.186995	0.393666
	110.197	0.100911	0.57207	0.136102	0.235441	0.185771	0.447304	0.190473	0.844152	0.209839	0.394787
	110.732	0.101971	0.571246	0.13476	0.240536	0.187648	0.43513	0.188402	0.786067	0.228991	0.356966
	111.267	0.102972	0.568684	0.132319	0.243705	0.188012	0.419996	0.187288	0.711641	0.234709	0.332476
	111.802	0.104523	0.537681	0.125391	0.239534	0.182463	0.402623	0.201765	0.6846	0.232887	0.328057
	112.337	0.106264	0.522115	0.127301	0.241546	0.184424	0.412726	0.217016	0.668662	0.223664	0.32988
	112.872	0.108113	0.530193	0.125728	0.244373	0.185051	0.411206	0.24237	0.714482	0.205712	0.352125
	113.407	0.108	0.535354	0.120046	0.235824	0.177935	0.392037	0.26168	0.748536	0.210495	0.331264
	113.942	0.108931	0.546655	0.116445	0.231188	0.173817	0.378583	0.283993	0.752451	0.212333	0.323365
	114.477	0.119281	0.561295	0.10838	0.222013	0.165197	0.359272	0.304428	0.742846	0.202066	0.31658
	115.012	0.12897	0.564729	0.0970741	0.214696	0.155885	0.331805	0.317807	0.729604	0.184146	0.299303
	115.547	0.13305	0.540794	0.0839299	0.201277	0.142604	0.316601	0.332635	0.73459	0.178065	0.288145
	116.082	0.13596	0.497867	0.0605275	0.187765	0.124146	0.302589	0.342945	0.771132	0.176686	0.287115
	116.617	0.131203	0.474739	0.0444295	0.164929	0.104679	0.301898	0.349556	0.814834	0.168711	0.311247
	117.151	0.128163	0.453935	0.0415899	0.144204	0.0928968	0.315357	0.351843	0.83375	0.165262	0.327596
	117.686	0.119204	0.452409	0.051775	0.131607	0.0916909	0.324893	0.366477	0.831255	0.172856	0.318933
	118.221	0.114062	0.433229	0.0547417	0.134907	0.0948246	0.328075	0.386789	0.832368	0.179876	0.306524
	118.756	0.109767	0.449616	0.0574032	0.129855	0.0936292	0.343395	0.396795	0.815342	0.17471	0.296484
	119.291	0.113387	0.488713	0.0621109	0.125032	0.0935712	0.358749	0.381967	0.781264	0.164828	0.300042
	119.826	0.11854	0.526905	0.0651847	0.108922	0.0870536	0.36203	0.359314	0.751848	0.172963	0.313338
	120.361	0.121977	0.555056	0.0720605	0.111479	0.0917697	0.363444	0.327733	0.758505	0.198821	0.293952
	120.896	0.115219	0.57111	0.060874	0.118504	0.0896891	0.364267	0.309122	0.804382	0.206869	0.279132
	121.431	0.0961326	0.566367	0.062409	0.132013	0.097211	0.349464	0.298387	0.828231	0.207644	0.273623
	121.966	0.0813124	0.551387	0.0688184	0.136125	0.102472	0.333192	0.279895	0.83226	0.207076	0.269882
	122.501	0.0794842	0.551695	0.0726901	0.139059	0.105874	0.320499	0.261574	0.78377	0.194233	0.271164
	123.036	0.0809037	0.541563	0.0788586	0.142356	0.110607	0.308856	0.245726	0.750877	0.175709	0.282728
	123.571	0.0802365	0.544037	0.0769623	0.156316	0.116639	0.295972	0.227313	0.696324	0.153332	0.289355
	124.106	0.0795459	0.519859	0.0671844	0.166292	0.116738	0.30685	0.198917	0.671361	0.144024	0.287357
	124.641	0.0780015	0.498682	0.0577522	0.172401	0.115077	0.303828	0.190772	0.652425	0.145083	0.277156
	125.176	0.0800835	0.488706	0.0689332	0.176489	0.122711	0.31208	0.182258	0.635606	0.135355	0.255794
	125.71	0.0828348	0.464063	0.0721392	0.172895	0.122517	0.303372	0.182665	0.650306	0.140178	0.233164
	126.245	0.0805132	0.456166	0.0727413	0.171633	0.122187	0.281798	0.182963	0.669311	0.146096	0.218908
	126.78	0.0798165	0.442168	0.0702265	0.164654	0.11744	0.269617	0.180804	0.671232	0.135315	0.22254
	127.315	0.0820044	0.4353	0.062201	0.152433	0.107317	0.250431	0.178348	0.65365	0.129357	0.214919
	127.85	0.094809	0.443739	0.0705477	0.144591	0.107569	0.228923	0.173287	0.618322	0.12811	0.196145
	128.385	0.101844	0.420772	0.0675093	0.14526	0.106385	0.224669	0.160989	0.588524	0.127399	0.172173
	128.92	0.0996977	0.395362	0.059074	0.142197	0.100636	0.224484	0.154004	0.561128	0.123933	0.179865
	129.455	0.092772	0.394112	0.0487255	0.138893	0.0938093	0.22349	0.149716	0.542442	0.111868	0.198931
	129.99	0.0859486	0.388907	0.0455817	0.131026	0.0883038	0.211106	0.144303	0.510009	0.115562	0.202704
	130.525	0.0853494	0.372679	0.0490165	0.125599	0.0873077	0.183658	0.133446	0.481057	0.113114	0.191961
	131.06	0.0852347	0.395115	0.0491308	0.123496	0.0863135	0.182885	0.127173	0.474656	0.114321	0.169185
	131.595	0.0831207	0.408542	0.0465203	0.127285	0.0869029	0.186626	0.124004	0.446373	0.117544	0.150699
	132.13	0.0827804	0.41803	0.0394422	0.132824	0.0861333	0.191611	0.132635	0.417871	0.107511	0.152967
	132.665	0.0822093	0.419769	0.038334	0.135964	0.0871491	0.198124	0.143098	0.380142	0.100592	0.16611
	133.2	0.0766461	0.395641	0.0368338	0.13795	0.0873917	0.203172	0.146566	0.372556	0.103722	0.166176
	133.735	0.0738321	0.349133	0.0400947	0.135635	0.087865	0.213324	0.147396	0.357441	0.109107	0.175812
	134.269	0.0713956	0.302375	0.0432407	0.12018	0.0817105	0.222904	0.145711	0.398156	0.110184	0.177507
	134.804	0.0647043	0.278994	0.041389	0.119082	0.0802353	0.222419	0.144694	0.433469	0.11205	0.174601
	135.339	0.0550036	0.30045	0.035157	0.123913	0.0795348	0.228953	0.140669	0.444751	0.107707	0.188021
	135.874	0.0470228	0.314477	0.0366776	0.131942	0.0843099	0.232966	0.132757	0.450846	0.101948	0.207176
	136.409	0.0442253	0.326119	0.0431674	0.144582	0.0938748	0.230685	0.128147	0.467766	0.100402	0.221348
	136.944	0.0439705	0.343892	0.0387205	0.150486	0.0946035	0.227316	0.126892	0.478242	0.100226	0.235829
	137.479	0.0358611	0.382049	0.0341542	0.152356	0.0932549	0.237253	0.12515	0.501346	0.096875	0.253435
	138.014	0.02324	0.419203	0.0284896	0.147781	0.0881351	0.25606	0.132536	0.526615	0.0919008	0.286915
	138.549	0.0189042	0.438784	0.0181536	0.141299	0.0797264	0.263412	0.149858	0.510979	0.100472	0.285453
	139.084	0.0192943	0.442363	0.00885447	0.136852	0.0728532	0.262225	0.181193	0.483857	0.108144	0.261453
	139.619	0.0260589	0.47543	0.00632906	0.129598	0.0679637	0.267758	0.22545	0.469439	0.117402	0.255201
	140.154	0.0315564	0.485417	0.00421018	0.115033	0.0596214	0.274045	0.259018	0.452567	0.12246	0.28712
	140.689	0.0340197	0.482596	0.000486725	0.102617	0.0515518	0.28739	0.287229	0.447532	0.137738	0.306818
	141.224	0.0359705	0.459822	0.00249739	0.0992719	0.0508846	0.304426	0.288648	0.441039	0.145611	0.30675
	141.759	0.0352473	0.440459	0.00496965	0.0955781	0.0502739	0.325351	0.286295	0.442912	0.143687	0.29671
	142.294	0.0309989	0.403414	0.00580762	0.0938346	0.0498211	0.341012	0.279407	0.416713	0.135113	0.27686
	142.828	0.0292338	0.366895	0.00814167	0.100354	0.0542481	0.349996	0.279133	0.367092	0.13714	0.259284
	143.363	0.0338285	0.338389	0.0121942	0.105879	0.0590367	0.362818	0.284971	0.364699	0.158009	0.247819
	143.898	0.0369005	0.309468	0.017909	0.105616	0.0617625	0.38737	0.272239	0.371656	0.164092	0.227934
	144.433	0.0356591	0.294459	0.0241566	0.096151	0.0601538	0.410868	0.254432	0.393366	0.158779	0.213848
	144.968	0.0351647	0.273972	0.0309498	0.0994621	0.0652059	0.415504	0.250107	0.410842	0.152016	0.220323
	145.503	0.0320022	0.241596	0.0366815	0.109995	0.0733384	0.403324	0.244206	0.41812	0.141557	0.233204
	146.038	0.0277545	0.216977	0.0490245	0.11871	0.0838675	0.387593	0.23282	0.413743	0.138303	0.208273
	146.573	0.0265268	0.207827	0.0564339	0.115836	0.086135	0.374417	0.22009	0.400411	0.135126	0.163949
	147.108	0.0189588	0.228836	0.0552776	0.110315	0.0827964	0.352484	0.194547	0.395368	0.129666	0.133261
	147.643	0.013647	0.243712	0.0504821	0.10233	0.076406	0.331185	0.16506	0.390303	0.12109	0.130129
	148.178	0.010038	0.262326	0.0438354	0.10002	0.0719279	0.32602	0.149768	0.396867	0.10289	0.1296
	148.713	0.00893848	0.284549	0.0420074	0.098261	0.0701342	0.329202	0.136762	0.391983	0.0871019	0.139414
	149.248	0.00833374	0.313631	0.0441587	0.0956923	0.0699255	0.318074	0.120496	0.39027	0.0866375	0.143277
	149.783	0.00805793	0.325616	0.0377447	0.083245	0.0604948	0.310082	0.0995383	0.396903	0.0857943	0.139859
	150.318	0.0103934	0.308112	0.0353575	0.0765496	0.0559535	0.301608	0.0948384	0.402462	0.0846661	0.134428
	150.853	0.0155699	0.279651	0.032989	0.0770271	0.0550081	0.295367	0.0896426	0.409697	0.0820456	0.128621
	151.387	0.0202775	0.276445	0.0252239	0.0805499	0.0528869	0.280886	0.0910975	0.404784	0.0809551	0.121792
	151.922	0.0178705	0.245632	0.0197824	0.0826127	0.0511975	0.26887	0.0975305	0.38503	0.0755342	0.118395
	152.457	0.0140556	0.207337	0.0106927	0.0886393	0.049666	0.246301	0.110771	0.357298	0.0682029	0.126788
	152.992	0.0135748	0.189	-9.46142e-05	0.0933154	0.0466104	0.234663	0.128161	0.355939	0.072794	0.128584
	153.527	0.0122364	0.185629	-0.0124897	0.0965988	0.0420545	0.223358	0.14759	0.366915	0.0807791	0.120101
	154.062	0.00907126	0.187301	-0.0198684	0.0984003	0.039266	0.232607	0.159152	0.390814	0.0771098	0.10208
	154.597	0.00755225	0.187775	-0.0199916	0.0964269	0.0382176	0.24445	0.159545	0.409197	0.0781543	0.0892704
	155.132	0.00696278	0.183675	-0.018812	0.0915289	0.0363584	0.246306	0.165424	0.402848	0.0756152	0.0834755
	155.667	0.00736338	0.191857	-0.0155898	0.0886154	0.0365128	0.248919	0.166386	0.385545	0.0717596	0.0905491
	156.202	0.00785752	0.201496	-0.0154309	0.0842641	0.0344166	0.250516	0.184837	0.377809	0.0691038	0.104245
	156.737	0.00996617	0.20101	-0.0166705	0.0753555	0.0293425	0.255427	0.206745	0.374331	0.0704686	0.109979
	157.272	0.00921584	0.186497	-0.0205067	0.0712511	0.0253722	0.254226	0.237009	0.383799	0.069884	0.119527
	157.807	0.00703955	0.173322	-0.0202457	0.0707362	0.0252453	0.249795	0.242908	0.382318	0.0861378	0.109378
	158.342	0.00931234	0.158579	-0.0137448	0.0735551	0.0299052	0.245612	0.24061	0.371809	0.0928192	0.103177
	158.877	0.014964	0.13687	-0.00621737	0.0703437	0.0320631	0.254545	0.24355	0.361819	0.0984397	0.108616
	159.412	0.0157247	0.121385	-0.00584906	0.0721792	0.0331651	0.251239	0.248341	0.345185	0.093776	0.117959
	159.947	0.0160915	0.101013	-0.00146624	0.0663216	0.0324277	0.246126	0.256526	0.344091	0.0818408	0.131948
	160.481	0.02117	0.102905	0.00175368	0.0678728	0.0348133	0.245379	0.2455	0.336807	0.085302	0.132333
	161.016	0.0235463	0.0982968	0.00417164	0.0718876	0.0380296	0.238713	0.231504	0.342988	0.0845926	0.117135
	161.551	0.0280734	0.106294	0.00778877	0.0749201	0.0413544	0.221416	0.19686	0.339619	0.0904788	0.119511
	162.086	0.0332513	0.141564	0.00335739	0.0726547	0.038006	0.220136	0.174821	0.330228	0.0888662	0.122133
	162.621	0.0334748	0.187449	0.00585801	0.0692321	0.0375451	0.232179	0.137113	0.319514	0.0928694	0.13022
	163.156	0.0294023	0.253222	0.00920489	0.0639657	0.0365853	0.245688	0.134348	0.306064	0.0851656	0.128622
	163.691	0.026686	0.285276	0.0109949	0.0639596	0.0374772	0.246093	0.126413	0.298612	0.0795757	0.124251
	164.226	0.0247799	0.293243	0.0140608	0.0666332	0.040347	0.25512	0.121867	0.294004	0.079303	0.126974
	164.761	0.0271619	0.304466	0.0166065	0.0684592	0.0425328	0.252498	0.0786351	0.297221	0.0815082	0.130091
	165.296	0.0297698	0.317113	0.00842139	0.0701847	0.0393031	0.250397	0.0806003	0.298593	0.0797791	0.128162
	165.831	0.0285171	0.318115	0.00361975	0.0675153	0.0355675	0.24731	0.0849602	0.305747	0.0793098	0.141136
	166.366	0.024007	0.301216	-0.00194025	0.059024	0.0285419	0.240729	0.0883675	0.310901	0.0805813	0.134203
	166.901	0.0209077	0.287015	-0.00710466	0.051047	0.0219712	0.224937	0.090698	0.31203	0.0902366	0.131409
	167.436	0.0217206	0.278396	-0.0163452	0.0492992	0.016477	0.218639	0.082296	0.304867	0.0994028	0.129493
	167.971	0.0234344	0.265482	-0.014656	0.0507526	0.0180483	0.224775	0.0823908	0.294856	0.107845	0.122138
	168.506	0.0253892	0.244046	-0.0129269	0.0539372	0.0205051	0.234406	0.0904214	0.27939	0.111972	0.120908
	169.04	0.0266805	0.223228	-0.0210425	0.0533467	0.0161521	0.245196	0.102629	0.278746	0.116585	0.115811
	169.575	0.0259054	0.181579	-0.0279543	0.0429649	0.00750534	0.250196	0.109322	0.27637	0.129099	0.105385
	170.11	0.0253485	0.129482	-0.0257931	0.0405123	0.00735959	0.266588	0.112023	0.275072	0.130304	0.110756
	170.645	0.0236089	0.10202	-0.0216471	0.0459699	0.0121614	0.274511	0.116476	0.265457	0.136814	0.129467
	171.18	0.0223342	0.0726733	-0.0202057	0.0500848	0.0149395	0.274597	0.123839	0.252885	0.136391	0.135653
	171.715	0.0180637	0.0513169	-0.0156941	0.0492647	0.0167853	0.279439	0.135323	0.264681	0.129449	0.133073
	172.25	0.0172599	0.0409854	-0.0144242	0.0449655	0.0152707	0.277179	0.14459	0.275134	0.126139	0.119088
	172.785	0.0175221	0.0408274	-0.011221	0.0453838	0.0170814	0.277681	0.143716	0.279069	0.113316	0.100351
	173.32	0.0155162	0.0465069	-0.013126	0.0460311	0.0164526	0.264112	0.138295	0.282485	0.102641	0.0858975
	173.855	0.0196942	0.040222	-0.0116275	0.047545	0.0179587	0.258452	0.138959	0.283711	0.100222	0.073528
	174.39	0.0242969	0.0539612	0.00104769	0.0489498	0.0249988	0.253116	0.141136	0.279547	0.0932358	0.0719509
	174.925	0.0249236	0.0736858	0.00900721	0.0527824	0.0308948	0.255531	0.144015	0.269464	0.0882306	0.0732833
	175.46	0.0216174	0.0849591	0.0139093	0.0532581	0.0335837	0.2421	0.147239	0.246888	0.0945116	0.0668709
	175.995	0.0209952	0.0883136	0.0206401	0.0535928	0.0371164	0.239448	0.127827	0.219561	0.102538	0.066668
	176.53	0.0216869	0.0767514	0.025503	0.0527521	0.0391276	0.23848	0.102601	0.216523	0.110437	0.0736865
	177.065	0.0206134	0.0637024	0.0205616	0.0506053	0.0355834	0.239925	0.100684	0.21824	0.108683	0.0801554
	177.599	0.020407	0.0598481	0.0141162	0.0502938	0.032205	0.245524	0.103571	0.218492	0.0975695	0.0809984
	178.134	0.0233385	0.0642489	0.0111603	0.0513592	0.0312598	0.246569	0.0974527	0.219524	0.0924381	0.0886117
	178.669	0.0192104	0.0845834	0.0150204	0.0513306	0.0331755	0.249217	0.0884732	0.211054	0.0924845	0.105396
	179.204	0.0170754	0.0971403	0.0103455	0.0494173	0.0298814	0.256839	0.0872748	0.20082	0.0908441	0.119369
	179.739	0.0193243	0.0935053	0.00604256	0.0476422	0.0268424	0.266336	0.0888073	0.202519	0.0816975	0.133546
	180.274	0.0260672	0.102792	0.00614406	0.0454221	0.0257831	0.278258	0.0902199	0.21014	0.0808293	0.146089
	180.809	0.0328553	0.116442	0.00118877	0.0459621	0.0235754	0.290391	0.0982602	0.205208	0.0829458	0.154671
	181.344	0.0396374	0.125658	-0.00590803	0.042393	0.0182425	0.308698	0.113283	0.19599	0.0876837	0.155721
	181.879	0.0439485	0.138573	-0.00883872	0.043989	0.0175752	0.344326	0.125254	0.195699	0.0845921	0.145552
	182.414	0.0511818	0.130524	-0.0079015	0.0420764	0.0170874	0.384792	0.139345	0.183268	0.0832404	0.134083
	182.949	0.0575893	0.126571	-0.00821735	0.0333815	0.0125821	0.404757	0.146377	0.182846	0.0828803	0.125013
	183.484	0.0619054	0.124439	-0.0155071	0.0262032	0.00534802	0.407111	0.150265	0.193658	0.0866859	0.125664
	184.019	0.0646659	0.118898	-0.0254043	0.0242427	-0.000580794	0.406203	0.150573	0.183253	0.0994296	0.136835
	184.554	0.067571	0.101478	-0.0291341	0.0255486	-0.00179275	0.396483	0.150785	0.177877	0.107969	0.13381
	185.089	0.0652689	0.0781215	-0.0258783	0.025973	4.73449e-05	0.396774	0.145411	0.183371	0.122082	0.137426
	185.624	0.0559521	0.0797216	-0.0251097	0.0213527	-0.0018785	0.392546	0.148415	0.204885	0.133769	0.149157
	186.158	0.0494011	0.0855999	-0.0284154	0.0189114	-0.00475203	0.364184	0.157729	0.222999	0.138616	0.146704
	186.693	0.0477212	0.0769694	-0.0285515	0.015032	-0.00675972	0.333085	0.173202	0.231159	0.144828	0.136088
	187.228	0.0483755	0.0765852	-0.0293746	0.0144647	-0.00745491	0.316981	0.174219	0.235806	0.155072	0.126069
	187.763	0.0475162	0.076406	-0.0265451	0.00953548	-0.00850479	0.337768	0.166707	0.248869	0.163586	0.120451
	188.298	0.0430933	0.0682194	-0.0250698	0.00854584	-0.00826197	0.361976	0.148002	0.267685	0.163701	0.109025
	188.833	0.039422	0.0600291	-0.0245939	0.0100186	-0.00728766	0.373416	0.121387	0.282546	0.151151	0.102282
	189.368	0.0423847	0.0585759	-0.0209907	0.0132983	-0.00384621	0.372395	0.114494	0.278908	0.144833	0.0939507
	189.903	0.0456351	0.0540649	-0.0178466	0.0155927	-0.00112695	0.368263	0.113017	0.289701	0.137172	0.0963469
	190.438	0.0444132	0.0615647	-0.0160087	0.0143643	-0.000822214	0.360305	0.111231	0.293081	0.134116	0.0954176
	190.973	0.0417665	0.0773576	-0.0157002	0.0131278	-0.0012862	0.338714	0.106909	0.278184	0.132201	0.093868
	191.508	0.0431745	0.0810177	-0.022281	0.0155934	-0.00334377	0.32633	0.0838763	0.254752	0.139252	0.0882905
	192.043	0.0429412	0.082499	-0.0255882	0.0119897	-0.00679922	0.320284	0.0763679	0.23218	0.145665	0.0835174
	192.578	0.0425275	0.0747914	-0.0260805	0.0024792	-0.0118006	0.315014	0.076254	0.214566	0.1517	0.0889211
	193.113	0.0460873	0.0690462	-0.0275643	-0.00351335	-0.0155388	0.323526	0.0781456	0.198414	0.152055	0.107317
	193.648	0.0492961	0.0784836	-0.0368067	-0.00756779	-0.0221872	0.360743	0.0757929	0.184352	0.148402	0.116023
	194.183	0.0522525	0.070002	-0.0437801	-0.011446	-0.0276131	0.381037	0.0777717	0.164375	0.142874	0.120457
	194.717	0.0518843	0.061557	-0.0493833	-0.0118624	-0.0306229	0.375184	0.0759541	0.144187	0.139937	0.119993
	195.252	0.0501585	0.0572726	-0.0459657	-0.0151372	-0.0305514	0.378639	0.0726292	0.130975	0.136883	0.14038
	195.787	0.0477588	0.0646816	-0.0389231	-0.0153443	-0.0271337	0.377144	0.0757666	0.12797	0.128334	0.175735
	196.322	0.0429332	0.0785277	-0.0332551	-0.0149399	-0.0240975	0.374089	0.0820158	0.128941	0.121937	0.206072
	196.857	0.0378254	0.0694309	-0.0249454	-0.0120613	-0.0185033	0.369324	0.0806947	0.12224	0.113942	0.215378
	197.392	0.0427063	0.0553208	-0.0193068	-0.00824527	-0.013776	0.359345	0.088425	0.122519	0.111937	0.224988
	197.927	0.0462454	0.0459331	-0.0107063	-0.011104	-0.0109051	0.362852	0.0959521	0.131869	0.124112	0.217552
	198.462	0.0500198	0.0399079	-0.00629695	-0.0103167	-0.00830684	0.369507	0.0959867	0.139297	0.129395	0.212336
	198.997	0.0525635	0.0348425	-0.013613	-0.0092485	-0.0114308	0.385132	0.102762	0.130345	0.129616	0.206105
	199.532	0.0504958	0.0298474	-0.0167895	-0.000280489	-0.00853499	0.395014	0.101887	0.129485	0.12371	0.205351
	200.067	0.0508687	0.036591	-0.0167776	0.00882928	-0.00397417	0.380336	0.106372	0.13794	0.119905	0.207086

## Sheet: acvr1ba+1bb MO lateral
	Figure 4 - figure supplement 1
	acvr1b-a-/- + acvr1b-b MO, lateral view
		Background-subtracted and normalized intensity in acvr1b-a-/- + acvr1b-b MO embryos, lateral view
	Distance (µm)	Embryo
		1	2	3	4	5	6	7
	0	1.19738	0.0723561	0.135645	0.195322	0.435913	0.161533	-0.191319
	0.534938	1.14364	0.0773964	0.127337	0.173884	0.436069	0.157567	-0.190332
	1.06988	1.09319	0.091112	0.114498	0.168501	0.436127	0.168627	-0.194031
	1.60481	1.06307	0.111184	0.110476	0.16962	0.426455	0.165818	-0.194867
	2.13975	1.01204	0.106234	0.111286	0.160364	0.417713	0.159066	-0.196292
	2.67469	0.99258	0.0917322	0.105509	0.147644	0.405362	0.160117	-0.19989
	3.20963	1.0119	0.0712987	0.0996956	0.141663	0.392633	0.166016	-0.194463
	3.74457	1.04083	0.0801458	0.0968007	0.135649	0.378937	0.178447	-0.188565
	4.27951	1.04834	0.0631968	0.093841	0.132009	0.361654	0.181872	-0.18768
	4.81444	1.03506	0.0563235	0.0936847	0.125395	0.360378	0.193579	-0.190415
	5.34938	1.03837	0.0521468	0.10547	0.106991	0.365499	0.197303	-0.194698
	5.88432	1.03642	0.0425337	0.118078	0.0928709	0.375518	0.20993	-0.19875
	6.41926	1.03086	0.0290428	0.124542	0.0842785	0.363298	0.232981	-0.193804
	6.9542	1.00219	0.0216797	0.128932	0.069201	0.356371	0.244726	-0.187223
	7.48913	0.979561	0.0195917	0.128832	0.0557156	0.350561	0.248279	-0.179359
	8.02407	0.984225	0.0233747	0.144616	0.0516125	0.345368	0.247369	-0.1725
	8.55901	0.993714	0.0295692	0.14298	0.0473924	0.346226	0.225043	-0.168858
	9.09395	0.982939	0.0349064	0.13538	0.0325951	0.351994	0.20164	-0.163735
	9.62889	0.991166	0.0283157	0.121737	0.0293091	0.349745	0.191452	-0.160758
	10.1638	1.00073	0.0129173	0.106357	0.0330995	0.343639	0.183924	-0.158566
	10.6988	1.00827	0.00933164	0.0849496	0.0336163	0.337587	0.174559	-0.157094
	11.2337	0.983781	0.00551852	0.0622733	0.034186	0.341526	0.164038	-0.151855
	11.7686	0.951014	0.000842868	0.0453289	0.038203	0.338906	0.16494	-0.142712
	12.3036	0.929046	0.00356077	0.0408244	0.0372558	0.347797	0.168261	-0.133672
	12.8385	0.915583	0.00219923	0.035478	0.0408078	0.368592	0.173755	-0.12749
	13.3735	0.896252	-0.000840433	0.0399482	0.039215	0.380066	0.175933	-0.128909
	13.9084	0.888301	-0.0130962	0.0489792	0.0382768	0.388903	0.177351	-0.125154
	14.4433	0.901351	-0.0182702	0.0536545	0.036752	0.382277	0.201509	-0.11978
	14.9783	0.928564	-0.02167	0.0411051	0.0386874	0.354623	0.226068	-0.110368
	15.5132	0.947089	-0.0250217	0.0315659	0.0343672	0.352344	0.234174	-0.100484
	16.0481	0.980009	-0.026491	0.034573	0.0338292	0.355768	0.229596	-0.0949719
	16.5831	1.00498	-0.0331141	0.0403888	0.033359	0.352353	0.223318	-0.0907931
	17.118	1.02845	-0.0330455	0.0476081	0.0368305	0.356558	0.217107	-0.0891205
	17.653	1.03173	-0.0309902	0.0512768	0.0400445	0.361469	0.219826	-0.0848759
	18.1879	1.04902	-0.0377999	0.0551869	0.0459949	0.354973	0.212061	-0.0765274
	18.7228	1.06065	-0.0414924	0.0504083	0.0496846	0.355919	0.221298	-0.0721031
	19.2578	1.04569	-0.0398162	0.0515466	0.0459164	0.362155	0.225785	-0.0676975
	19.7927	1.02224	-0.0338324	0.0473259	0.0423925	0.368277	0.200882	-0.0710039
	20.3276	1.01041	-0.0226111	0.0396379	0.0387389	0.36599	0.172822	-0.0806574
	20.8626	0.987421	-0.0157916	0.0348337	0.0317031	0.350525	0.149307	-0.0855701
	21.3975	0.945888	-0.0126696	0.036206	0.0294273	0.337218	0.119948	-0.0878537
	21.9325	0.891987	-0.0171403	0.0338885	0.0239452	0.329393	0.111348	-0.0834466
	22.4674	0.883342	-0.0104196	0.0383009	0.0235819	0.326092	0.109495	-0.080657
	23.0023	0.880107	0.00282009	0.0304649	0.028177	0.333086	0.103457	-0.0849411
	23.5373	0.879788	0.00850781	0.0182942	0.0324917	0.341591	0.0891161	-0.0910373
	24.0722	0.888894	0.00579288	-0.000157494	0.0434504	0.342548	0.0701822	-0.0995641
	24.6072	0.906574	0.00576988	-0.0169046	0.0514107	0.334195	0.0684381	-0.102359
	25.1421	0.90947	-0.00108098	-0.0254463	0.0553107	0.325892	0.066133	-0.0998442
	25.677	0.89937	-0.00482997	-0.0282107	0.0521059	0.306043	0.0600517	-0.0922571
	26.212	0.883372	-0.00780251	-0.0196319	0.0495576	0.292047	0.048692	-0.087334
	26.7469	0.877019	-0.0175473	-0.0294638	0.0480866	0.290549	0.0326722	-0.0815449
	27.2818	0.887667	-0.0150543	-0.0352087	0.0440528	0.289351	0.0269908	-0.0772131
	27.8168	0.878844	-0.0114635	-0.037024	0.0368661	0.283624	0.0217872	-0.0770896
	28.3517	0.878892	-0.00911091	-0.0362908	0.0307593	0.286511	0.0183046	-0.0815391
	28.8867	0.850965	-0.0124683	-0.0380047	0.0212823	0.295724	0.0139747	-0.0758711
	29.4216	0.819522	-0.00345532	-0.0376663	0.0164297	0.304608	0.00591853	-0.0702984
	29.9565	0.797211	0.0139715	-0.0386387	0.0137025	0.318338	0.000210911	-0.0694755
	30.4915	0.805118	0.0138143	-0.0401886	0.0224057	0.327977	-0.0127612	-0.064673
	31.0264	0.824324	0.0136886	-0.0393563	0.0329796	0.326042	-0.02576	-0.0593476
	31.5614	0.808463	0.0126356	-0.0456039	0.0351793	0.315665	-0.0254894	-0.0617504
	32.0963	0.806055	0.0136831	-0.0533758	0.0275342	0.316037	-0.0227237	-0.0560636
	32.6312	0.83256	0.0127116	-0.0538008	0.0272886	0.313356	-0.0194309	-0.0478816
	33.1662	0.859773	-0.000803669	-0.0525595	0.0245478	0.305954	-0.0105764	-0.0391632
	33.7011	0.877375	-0.0127284	-0.0535577	0.0148624	0.30223	8.71825e-05	-0.0314385
	34.236	0.881645	-0.015894	-0.0596371	0.00129826	0.295536	0.00383434	-0.0273842
	34.771	0.904558	-0.00938297	-0.0636677	-0.00677997	0.28991	0.0110378	-0.0150494
	35.3059	0.936606	-0.0197224	-0.0686403	-0.0176822	0.284363	0.0199663	-0.0046028
	35.8409	0.945615	-0.0331117	-0.0715917	-0.0215524	0.27373	0.0309258	0.00786551
	36.3758	0.942366	-0.0401002	-0.0663799	-0.0219174	0.269266	0.0295785	0.00418733
	36.9107	0.905032	-0.0417832	-0.0635279	-0.0147746	0.258556	0.0374997	-0.00369526
	37.4457	0.860103	-0.0378828	-0.0602942	-0.00552467	0.246606	0.0486978	-0.00943253
	37.9806	0.819177	-0.0336985	-0.0595365	0.0020251	0.247897	0.0707818	-0.009711
	38.5155	0.785089	-0.0309022	-0.059219	-0.002086	0.246051	0.0918347	-0.00367785
	39.0505	0.756164	-0.0315687	-0.0485306	-0.00624177	0.241924	0.101616	0.0088411
	39.5854	0.76507	-0.0359558	-0.0411242	-0.00575841	0.236741	0.1016	0.0245006
	40.1204	0.766662	-0.0441478	-0.0434834	-0.00778615	0.231626	0.10462	0.0315251
	40.6553	0.787038	-0.048059	-0.0414533	-0.00701822	0.219171	0.102736	0.02361
	41.1902	0.745177	-0.0539682	-0.0402969	-0.00450172	0.217381	0.100247	0.0144546
	41.7252	0.68767	-0.0536969	-0.04336	-0.00253509	0.221328	0.0916737	0.0052791
	42.2601	0.628118	-0.0478553	-0.0432196	0.00101589	0.218981	0.0683994	0.000284366
	42.7951	0.550824	-0.040364	-0.0467665	0.000504917	0.203549	0.0514989	-0.00985466
	43.33	0.502248	-0.0455664	-0.0452992	0.00472877	0.185428	0.0351297	-0.0173581
	43.8649	0.478172	-0.0388733	-0.0392699	0.0102705	0.168437	0.0267487	-0.0221803
	44.3999	0.470451	-0.0427744	-0.0366883	0.0142283	0.164834	0.0366867	-0.0135746
	44.9348	0.497339	-0.0472986	-0.0403886	0.0189337	0.173878	0.0439857	0.00302646
	45.4697	0.527249	-0.0474935	-0.0392781	0.0260938	0.182009	0.0491526	0.0142926
	46.0047	0.548093	-0.0448725	-0.0327228	0.0307421	0.184015	0.0603358	0.0140238
	46.5396	0.548353	-0.0400493	-0.0251659	0.0365307	0.173088	0.075149	0.00915434
	47.0746	0.547045	-0.0341406	-0.015806	0.0403162	0.159363	0.0886153	0.00615484
	47.6095	0.552209	-0.0311153	-0.0091196	0.039639	0.145781	0.0845826	0.00734763
	48.1444	0.569014	-0.0363947	-0.0024017	0.0371577	0.139526	0.0822173	0.0178018
	48.6794	0.576508	-0.0382685	0.00838611	0.0448813	0.13667	0.0745592	0.0196217
	49.2143	0.560161	-0.0374253	0.0105368	0.0534037	0.131596	0.0668029	0.0197757
	49.7492	0.569614	-0.028859	0.0143772	0.060713	0.117533	0.0754359	0.0200694
	50.2842	0.595765	-0.0215975	0.0205739	0.0648303	0.103493	0.084994	0.0130169
	50.8191	0.608211	-0.0202888	0.0251174	0.0609522	0.101611	0.0785384	0.00727563
	51.3541	0.607841	-0.0208051	0.0269245	0.052796	0.102818	0.0668119	0.00547542
	51.889	0.60439	-0.0158974	0.0290749	0.0494074	0.112794	0.0614914	0.00220953
	52.4239	0.595201	-0.0159734	0.0278519	0.0452619	0.126717	0.062713	-0.00588319
	52.9589	0.583071	-0.0111706	0.0370858	0.0493529	0.133968	0.065666	-0.00657159
	53.4938	0.560296	-0.0039128	0.0452199	0.0580323	0.125851	0.0629838	0.00443025
	54.0288	0.541344	-0.00134753	0.0552294	0.0636993	0.123692	0.0561636	0.0195202
	54.5637	0.550629	-0.00995266	0.0477858	0.0676813	0.129228	0.0518529	0.0188637
	55.0986	0.561563	-0.0144311	0.0352174	0.0720834	0.13071	0.0524421	0.0093153
	55.6336	0.578962	-0.0146248	0.0281097	0.0723956	0.126824	0.058184	0.00606944
	56.1685	0.595797	-0.015469	0.0232738	0.065621	0.118705	0.067841	0.0034919
	56.7034	0.602651	-0.0170408	0.0176934	0.0664477	0.116543	0.0788136	-1.60839e-05
	57.2384	0.596579	-0.0165155	0.0240861	0.070385	0.116284	0.0742713	-0.00772025
	57.7733	0.559158	-0.00526584	0.0204085	0.0794987	0.112172	0.072383	-0.00447429
	58.3083	0.546473	-0.00373585	0.0164983	0.0814769	0.108575	0.0700038	0.00350095
	58.8432	0.544102	-0.00537909	0.0151579	0.0808541	0.111653	0.0714421	0.00195797
	59.3781	0.527808	-0.0133428	0.0116904	0.0797104	0.117428	0.0725673	-0.00379726
	59.9131	0.515157	-0.0222969	0.0122103	0.0698829	0.12204	0.074077	-0.00840667
	60.448	0.513244	-0.0270627	0.0234745	0.0700979	0.122875	0.0845438	-0.00568031
	60.9829	0.509937	-0.0298503	0.0349857	0.059318	0.1223	0.0964129	-0.00511955
	61.5179	0.521828	-0.0379126	0.0419192	0.0592838	0.120035	0.0995694	0.0014648
	62.0528	0.549419	-0.0386286	0.0453247	0.0540608	0.113528	0.100977	0.00720216
	62.5878	0.570686	-0.0316814	0.0509528	0.0397159	0.116791	0.108553	0.0044352
	63.1227	0.568898	-0.031168	0.0618783	0.0354688	0.118914	0.119203	0.00414452
	63.6576	0.57416	-0.0281286	0.0648789	0.0380073	0.119465	0.135838	0.0034107
	64.1926	0.574888	-0.0365544	0.0638083	0.0377521	0.122068	0.137671	0.0106049
	64.7275	0.561176	-0.0400176	0.0621874	0.0416564	0.127934	0.127681	0.0158228
	65.2625	0.542942	-0.0372573	0.0575703	0.0424338	0.136572	0.128823	0.0123512
	65.7974	0.529436	-0.0338848	0.0500743	0.0479841	0.13757	0.138662	0.00779511
	66.3323	0.506394	-0.034282	0.0346717	0.0446153	0.131052	0.14982	0.00170658
	66.8673	0.475266	-0.0312911	0.0361248	0.0505934	0.122379	0.150612	-0.000716675
	67.4022	0.46705	-0.0229996	0.038466	0.0478153	0.11307	0.150963	-0.00183178
	67.9371	0.492758	-0.0251862	0.0359121	0.0399294	0.102474	0.149593	-0.000745053
	68.4721	0.524632	-0.0285223	0.0304006	0.0351934	0.0975996	0.129467	0.0139954
	69.007	0.533325	-0.031714	0.0314858	0.0347948	0.0954242	0.113593	0.0275711
	69.542	0.536446	-0.0333244	0.0342254	0.035488	0.104976	0.0929832	0.0416474
	70.0769	0.541879	-0.0358032	0.0416768	0.0367587	0.116485	0.0864232	0.0427888
	70.6118	0.5502	-0.0346662	0.0495588	0.034557	0.123592	0.0778067	0.0431342
	71.1468	0.541668	-0.038554	0.0487723	0.0303085	0.127368	0.0809973	0.0428136
	71.6817	0.537812	-0.0418132	0.0484135	0.0284138	0.135533	0.0734849	0.0457182
	72.2167	0.557328	-0.0360275	0.0543016	0.0276824	0.142297	0.0732805	0.044417
	72.7516	0.595867	-0.0391498	0.0477101	0.0246934	0.140321	0.075096	0.0431154
	73.2865	0.597252	-0.0300379	0.0483497	0.0196057	0.129131	0.078599	0.04039
	73.8215	0.579475	-0.0240003	0.0457039	0.0158298	0.120757	0.0830854	0.0350654
	74.3564	0.57794	-0.0218642	0.0387616	0.0168935	0.11279	0.0947146	0.0313476
	74.8913	0.583791	-0.0204944	0.0346381	0.0281812	0.10853	0.102279	0.0321324
	75.4263	0.611591	-0.0184196	0.028715	0.0364791	0.114218	0.0992885	0.0352718
	75.9612	0.600101	-0.00350049	0.0266732	0.0477662	0.117872	0.10106	0.0348523
	76.4962	0.606549	-0.000308316	0.0305064	0.0585639	0.120286	0.098399	0.0439004
	77.0311	0.622952	-0.00727698	0.0408387	0.0721852	0.121014	0.0911078	0.0378976
	77.566	0.625885	-0.0192357	0.044389	0.0799472	0.116668	0.0873864	0.0299887
	78.101	0.610785	-0.0341374	0.0502888	0.086026	0.11445	0.0876311	0.024199
	78.6359	0.598022	-0.0266868	0.0569259	0.0933117	0.11184	0.087424	0.0212655
	79.1708	0.587927	-0.0194826	0.0600542	0.0983025	0.109783	0.0833748	0.0282774
	79.7058	0.580522	-0.0238813	0.0607352	0.102821	0.111387	0.0811161	0.0364214
	80.2407	0.585216	-0.0314282	0.0630816	0.108796	0.116654	0.0787146	0.0379603
	80.7757	0.587533	-0.0199405	0.0706109	0.105126	0.120745	0.0751399	0.0355812
	81.3106	0.580134	-0.00570978	0.0731197	0.0990642	0.128642	0.0756725	0.0288765
	81.8455	0.584915	0.00599097	0.0776719	0.102948	0.131667	0.0807976	0.0272865
	82.3805	0.603218	0.010648	0.0813656	0.103453	0.134169	0.0842916	0.0265682
	82.9154	0.621243	0.0109283	0.0845021	0.097731	0.135122	0.08266	0.0269565
	83.4504	0.594864	0.0209676	0.0924955	0.0862888	0.131894	0.0922719	0.0232012
	83.9853	0.569007	0.0265507	0.0960717	0.081698	0.130228	0.101576	0.0166475
	84.5202	0.573279	0.0322485	0.0910956	0.0782348	0.131527	0.096238	0.00851833
	85.0552	0.565097	0.0404745	0.0769701	0.0745472	0.129923	0.102821	0.00119071
	85.5901	0.5471	0.0442392	0.0713606	0.0767766	0.121684	0.104466	0.0011213
	86.125	0.567732	0.0495267	0.0748728	0.0727374	0.113632	0.0966232	0.00168381
	86.66	0.583143	0.0491626	0.0759292	0.073327	0.110307	0.0864529	0.0014057
	87.1949	0.587188	0.0408315	0.0712998	0.0705413	0.10475	0.084402	-0.00152317
	87.7299	0.591923	0.0353422	0.0618685	0.0610247	0.100223	0.0947798	0.000202576
	88.2648	0.60163	0.0353093	0.0654364	0.0520913	0.0946051	0.102584	0.0149073
	88.7997	0.598855	0.0349254	0.0726319	0.047004	0.0939829	0.10725	0.0222505
	89.3347	0.570923	0.0417653	0.0830877	0.0480653	0.089985	0.117583	0.0220941
	89.8696	0.56945	0.0423024	0.0892168	0.0537348	0.0808923	0.140918	0.0225755
	90.4045	0.550131	0.0293691	0.0913822	0.0581159	0.0752144	0.144844	0.0287847
	90.9395	0.522397	0.0061631	0.0945651	0.0708605	0.0776067	0.151878	0.0273757
	91.4744	0.494196	-0.00429596	0.100289	0.0817232	0.0788485	0.153077	0.0270992
	92.0094	0.46243	-0.00779833	0.103485	0.0883999	0.0798398	0.159555	0.0314835
	92.5443	0.446692	-0.00553408	0.104074	0.0962827	0.0823089	0.180538	0.0395987
	93.0792	0.447772	-0.00566011	0.104411	0.096609	0.0863844	0.206229	0.0418884
	93.6142	0.457228	-0.00121876	0.123064	0.0919951	0.0886254	0.214071	0.0468722
	94.1491	0.457242	0.0111085	0.132123	0.087532	0.0898605	0.216226	0.0587336
	94.6841	0.449304	0.0107729	0.123402	0.0843318	0.0941437	0.204836	0.0674272
	95.219	0.449909	0.00323692	0.111235	0.084732	0.0996504	0.19515	0.0763588
	95.7539	0.448894	-0.0125513	0.106827	0.0874996	0.100212	0.185029	0.0730194
	96.2889	0.454079	-0.0225779	0.116726	0.0903978	0.102516	0.177924	0.0735955
	96.8238	0.467396	-0.0309556	0.128281	0.0896886	0.103451	0.163522	0.0722817
	97.3587	0.468927	-0.0335116	0.131142	0.0806253	0.105957	0.160407	0.080202
	97.8937	0.460375	-0.0383521	0.129395	0.0787154	0.110351	0.148553	0.0848133
	98.4286	0.461063	-0.0368501	0.129321	0.0856849	0.114505	0.126641	0.0788746
	98.9636	0.474669	-0.0311209	0.128629	0.0904375	0.117672	0.116663	0.0770493
	99.4985	0.490998	-0.022059	0.128511	0.0937121	0.124117	0.100097	0.0799977
	100.033	0.486674	-0.0149225	0.123623	0.0962711	0.124506	0.0938055	0.0809145
	100.568	0.469449	-0.00923681	0.12024	0.102712	0.122433	0.0919281	0.078913
	101.103	0.485335	-0.00459063	0.127039	0.105063	0.125092	0.0863948	0.0735444
	101.638	0.500035	-0.000871163	0.123398	0.111157	0.129951	0.0875687	0.0645362
	102.173	0.516335	0.000664407	0.11391	0.115269	0.126985	0.0888969	0.0647585
	102.708	0.532582	0.00131777	0.109618	0.115594	0.122441	0.0856193	0.0695817
	103.243	0.543494	-0.00350269	0.109096	0.121807	0.127251	0.0883151	0.0787399
	103.778	0.545691	-0.00545201	0.104256	0.12478	0.136331	0.0935809	0.0797341
	104.313	0.549541	-0.000563022	0.102218	0.11419	0.146533	0.104224	0.0764009
	104.848	0.536002	-0.00656386	0.0958612	0.104561	0.149704	0.114599	0.0730235
	105.383	0.530393	-0.00938472	0.108269	0.100963	0.147812	0.1131	0.0681249
	105.918	0.518002	-0.00152535	0.115157	0.0998525	0.143712	0.104949	0.0670846
	106.453	0.511505	0.0209932	0.121763	0.105306	0.141481	0.0991246	0.0629075
	106.988	0.496729	0.0425487	0.134473	0.106789	0.129661	0.0909348	0.0677772
	107.523	0.476698	0.0537198	0.135148	0.112976	0.117083	0.0770428	0.0706255
	108.058	0.458404	0.0543244	0.140045	0.115751	0.111966	0.0669996	0.0756142
	108.592	0.440512	0.0626329	0.142002	0.120067	0.108556	0.0601107	0.0825472
	109.127	0.416189	0.0715044	0.152715	0.119121	0.104757	0.0705159	0.0745327
	109.662	0.402064	0.0847827	0.163614	0.120888	0.101049	0.0841791	0.0726397
	110.197	0.396454	0.0909361	0.158655	0.117931	0.0954769	0.08435	0.0749571
	110.732	0.38393	0.089091	0.160242	0.11958	0.0891917	0.0951868	0.0740887
	111.267	0.383257	0.0849826	0.168999	0.126436	0.0856776	0.105848	0.0701199
	111.802	0.367578	0.0849581	0.172714	0.129099	0.0784506	0.11631	0.0664515
	112.337	0.357082	0.0832038	0.171049	0.129236	0.0778797	0.116072	0.0625392
	112.872	0.363979	0.072967	0.165967	0.125571	0.0795952	0.119116	0.0593665
	113.407	0.3581	0.0587191	0.161626	0.119497	0.0787598	0.13108	0.0597809
	113.942	0.349753	0.0436137	0.163973	0.111806	0.0767802	0.153173	0.0599323
	114.477	0.337241	0.0476542	0.160748	0.0999683	0.0746256	0.162551	0.0646369
	115.012	0.304494	0.0559023	0.154632	0.0982646	0.0765298	0.163365	0.0717497
	115.547	0.281247	0.0425798	0.15485	0.0899939	0.0887313	0.15908	0.0748018
	116.082	0.27261	0.0261677	0.152104	0.0865489	0.101568	0.160381	0.0739367
	116.617	0.273352	0.0135267	0.145009	0.0867765	0.114066	0.161295	0.0741552
	117.151	0.266683	-0.00246076	0.13659	0.0780184	0.122673	0.156051	0.0752127
	117.686	0.260691	-0.00817501	0.126012	0.0765527	0.127321	0.167371	0.0802729
	118.221	0.264227	-0.0132586	0.112715	0.0833027	0.137503	0.179105	0.0897434
	118.756	0.252449	-0.0208984	0.109308	0.0849526	0.155729	0.176838	0.0951369
	119.291	0.238513	-0.0270459	0.104967	0.0887061	0.166216	0.167416	0.0978497
	119.826	0.233155	-0.0296119	0.102962	0.0929986	0.164553	0.170326	0.0979295
	120.361	0.224013	-0.0223566	0.105402	0.0984872	0.152643	0.181093	0.0998964
	120.896	0.221068	-0.00702709	0.105589	0.103013	0.149406	0.18631	0.100732
	121.431	0.24148	0.0061322	0.103841	0.1012	0.149321	0.184233	0.102075
	121.966	0.269164	0.0157999	0.102099	0.112012	0.145977	0.184462	0.100288
	122.501	0.285969	0.0300812	0.104428	0.125349	0.143258	0.175192	0.100712
	123.036	0.300267	0.0437664	0.110582	0.129604	0.146943	0.168273	0.100766
	123.571	0.326057	0.0529688	0.115756	0.135962	0.153244	0.162626	0.0962476
	124.106	0.336857	0.0496037	0.116349	0.149054	0.152801	0.152326	0.090373
	124.641	0.324439	0.0396555	0.118873	0.166622	0.142676	0.13537	0.0844081
	125.176	0.332609	0.0408699	0.121464	0.179675	0.130891	0.124864	0.0730113
	125.71	0.323099	0.0438348	0.120965	0.187735	0.12882	0.111543	0.0665358
	126.245	0.320268	0.0447604	0.127482	0.189994	0.136224	0.114964	0.0666747
	126.78	0.302556	0.0446244	0.134348	0.19051	0.143892	0.119231	0.0660242
	127.315	0.304034	0.0470185	0.134936	0.188988	0.145287	0.121406	0.0672462
	127.85	0.297036	0.0516105	0.134615	0.185391	0.136059	0.121955	0.0646667
	128.385	0.294543	0.058159	0.13713	0.17748	0.125585	0.129059	0.0609311
	128.92	0.276633	0.0583232	0.13887	0.16273	0.11309	0.126029	0.0570256
	129.455	0.247316	0.0641152	0.135173	0.151698	0.103105	0.125613	0.0542642
	129.99	0.233238	0.066481	0.127355	0.138208	0.104467	0.121093	0.0509059
	130.525	0.218307	0.0627005	0.119783	0.126986	0.106993	0.121771	0.04918
	131.06	0.197265	0.0633985	0.113619	0.118656	0.109491	0.126277	0.0453481
	131.595	0.180577	0.0529286	0.110943	0.115923	0.11385	0.141645	0.0444767
	132.13	0.15297	0.036645	0.108386	0.11513	0.122885	0.152441	0.0457122
	132.665	0.143881	0.024306	0.10892	0.121467	0.132084	0.148983	0.0461834
	133.2	0.157825	0.0181645	0.105366	0.118086	0.131478	0.153134	0.0494245
	133.735	0.170044	0.0153021	0.105278	0.120546	0.129345	0.162326	0.0454682
	134.269	0.174264	0.00986214	0.109863	0.133189	0.131617	0.179982	0.0366193
	134.804	0.169941	-0.000255621	0.101222	0.141019	0.128576	0.19302	0.0307719
	135.339	0.174666	-0.000357682	0.0944358	0.148882	0.131019	0.206768	0.0196934
	135.874	0.180547	0.00429492	0.078719	0.158623	0.137861	0.212443	0.0125009
	136.409	0.199686	0.00275556	0.0733277	0.161335	0.142529	0.213524	0.00911202
	136.944	0.22103	-0.00387486	0.0739777	0.161842	0.147624	0.210179	0.0101471
	137.479	0.226429	-0.00283129	0.0857769	0.163415	0.1479	0.213183	0.00611573
	138.014	0.213739	0.00174701	0.0920483	0.165933	0.1497	0.215342	0.00550945
	138.549	0.203136	0.00919345	0.0942899	0.162004	0.153742	0.21826	0.00586764
	139.084	0.193673	0.012586	0.0986409	0.157801	0.151303	0.220362	0.00745919
	139.619	0.181396	0.0174278	0.102885	0.149091	0.149099	0.220975	0.0106259
	140.154	0.167998	0.0206262	0.111285	0.14555	0.150023	0.213021	0.0165801
	140.689	0.152317	0.0269621	0.119252	0.149186	0.146126	0.207632	0.0143391
	141.224	0.144048	0.0388588	0.121438	0.14989	0.140393	0.208668	0.0114909
	141.759	0.149174	0.0403855	0.117994	0.147634	0.131254	0.208744	0.0115277
	142.294	0.141426	0.0368381	0.117508	0.152089	0.122877	0.209983	0.0099215
	142.828	0.153407	0.0293188	0.120728	0.153893	0.116299	0.218056	0.0162463
	143.363	0.156711	0.0287458	0.120952	0.15081	0.120095	0.205552	0.0228658
	143.898	0.17308	0.0236977	0.118386	0.137994	0.124996	0.19577	0.0220343
	144.433	0.199116	0.0186039	0.120278	0.133293	0.120023	0.195457	0.0189886
	144.968	0.221754	0.00820164	0.119979	0.135284	0.108232	0.210434	0.0184255
	145.503	0.248947	0.00774673	0.118845	0.138236	0.0997864	0.218662	0.0314728
	146.038	0.251866	0.0147269	0.118088	0.13931	0.0979005	0.221835	0.0408298
	146.573	0.25345	0.0145984	0.118466	0.141835	0.0906014	0.217998	0.0597358
	147.108	0.265165	0.0118542	0.1197	0.151468	0.0835805	0.199744	0.0688388
	147.643	0.272608	0.00544982	0.12537	0.164314	0.0827058	0.19761	0.0726155
	148.178	0.270788	-0.00497387	0.12959	0.170084	0.088006	0.200489	0.0692938
	148.713	0.269279	-0.0182022	0.12881	0.167752	0.0984562	0.204392	0.0639957
	149.248	0.283017	-0.0308741	0.129702	0.165502	0.103282	0.220992	0.169506
	149.783	0.281333	-0.034779	0.132181	0.165409	0.104813	0.234866	0.132921
	150.318	0.269303	-0.0379076	0.132253	0.172087	0.0975758	0.244036	0.124233
	150.853	0.25514	-0.0346588	0.130258	0.175763	0.0948845	0.261642	0.118976
	151.387	0.250983	-0.0329459	0.127587	0.176618	0.094843	0.277853	0.112619
	151.922	0.255739	-0.0295977	0.121176	0.177449	0.096144	0.283442	0.105673
	152.457	0.25458	-0.0230239	0.116733	0.175929	0.10091	0.283652	0.117121
	152.992	0.248302	-0.0193088	0.123974	0.17547	0.103407	0.278884	0.117949
	153.527	0.238589	-0.0163648	0.134265	0.173632	0.0994803	0.283222	0.116438
	154.062	0.217687	-0.0163058	0.143043	0.16827	0.0941313	0.289688	0.125038
	154.597	0.195504	-0.0266392	0.14796	0.16126	0.0900641	0.284741	0.135137
	155.132	0.179528	-0.0265536	0.153724	0.16471	0.0937839	0.267078	0.135405
	155.667	0.174281	-0.0183194	0.151893	0.172342	0.0991543	0.253087	0.13268
	156.202	0.176349	-0.0127205	0.15256	0.181159	0.108088	0.242757	0.13096
	156.737	0.183567	-0.0044986	0.155809	0.182865	0.112073	0.2387	0.130354
	157.272	0.185495	-0.0024954	0.159714	0.163375	0.119148	0.245969	0.13081
	157.807	0.183294	-0.00417346	0.161885	0.156562	0.118919	0.245586	0.127288
	158.342	0.180344	-0.00871315	0.160246	0.15264	0.123789	0.2371	0.124152
	158.877	0.171014	-0.00614535	0.158995	0.145965	0.128912	0.236241	0.126265
	159.412	0.15217	-0.0011521	0.161393	0.142047	0.128135	0.235052	0.128268
	159.947	0.148065	0.0075564	0.160684	0.142339	0.103435	0.235618	0.129867
	160.481	0.145631	0.0154656	0.162826	0.143255	0.104478	0.227466	0.130021
	161.016	0.139281	0.0307969	0.167003	0.141082	0.100416	0.211736	0.124946
	161.551	0.130355	0.0457451	0.167398	0.139155	0.0820744	0.202759	0.118038
	162.086	0.130283	0.04835	0.173842	0.133259	0.0830208	0.205626	0.108233
	162.621	0.123383	0.0471519	0.171671	0.140694	0.101228	0.20933	0.102217
	163.156	0.130039	0.0536049	0.16957	0.147063	0.12146	0.210777	0.0987227
	163.691	0.131688	0.0621094	0.164926	0.153281	0.134182	0.208895	0.0936905
	164.226	0.139759	0.0776512	0.16038	0.160137	0.134452	0.217787	0.0929345
	164.761	0.137264	0.084689	0.152819	0.170591	0.132084	0.227528	0.096618
	165.296	0.120613	0.085759	0.151766	0.181214	0.132214	0.233078	0.0999125
	165.831	0.130776	0.0959663	0.1454	0.187014	0.132078	0.235565	0.101618
	166.366	0.155955	0.107947	0.14273	0.189142	0.130582	0.236881	0.100222
	166.901	0.1576	0.110689	0.141862	0.192225	0.121769	0.237986	0.109531
	167.436	0.159439	0.109004	0.141692	0.200128	0.120442	0.252152	0.10895
	167.971	0.159322	0.09521	0.14614	0.213143	0.114023	0.268309	0.106686
	168.506	0.158233	0.0719809	0.148806	0.219432	0.105338	0.272758	0.0989886
	169.04	0.158005	0.0548789	0.140972	0.222127	0.109683	0.27239	0.0940234
	169.575	0.141582	0.046724	0.1406	0.210041	0.109609	0.270198	0.0930454
	170.11	0.128666	0.0420514	0.142184	0.195791	0.111997	0.286013	0.0938487
	170.645	0.129481	0.0389185	0.148513	0.186677	0.102979	0.294756	0.0899648
	171.18	0.154108	0.0323142	0.146312	0.180116	0.0885008	0.283771	0.0881197
	171.715	0.15916	0.019855	0.147309	0.180478	0.0770063	0.278541	0.0886509
	172.25	0.158793	0.00528077	0.150822	0.1853	0.0836121	0.25294	0.0840052
	172.785	0.15763	-0.00944507	0.154501	0.182359	0.0885614	0.235556	0.0814313
	173.32	0.158705	-0.0204404	0.15809	0.179355	0.086372	0.220755	0.0797916
	173.855	0.165609	-0.017774	0.160635	0.163981	0.0788933	0.204738	0.0737855
	174.39	0.16836	-0.0144825	0.105595	0.156411	0.0751798	0.205742	0.0636021
	174.925	0.152027	-0.0122808	0.116806	0.153407	0.0775196	0.218442	0.0592013
	175.46	0.142805	-0.0130849	0.125627	0.156843	0.0799379	0.229619	0.063555
	175.995	0.127172	-0.00997448	0.132928	0.165435	0.0781468	0.232576	0.0611895
	176.53	0.121653	-0.00553378	0.130926	0.168673	0.0848581	0.235067	0.0566643
	177.065	0.11407	-0.0123178	0.130248	0.170962	0.0995406	0.237882	0.0596595
	177.599	0.109704	-0.00912228	0.141463	0.172942	0.103251	0.245808	0.0648755
	178.134	0.118174	-0.0019923	0.157436	0.165006	0.101896	0.242162	0.0695681
	178.669	0.135249	0.00447174	0.172105	0.166183	0.094874	0.241635	0.0692597
	179.204	0.16052	0.00694561	0.175749	0.177871	0.0936011	0.236081	0.0724096
	179.739	0.174058	0.00176919	0.179935	0.183037	0.106907	0.222338	0.0731798
	180.274	0.228427	-0.00545646	0.186925	0.19183	0.121697	0.215967	0.0685356
	180.809	0.238083	-0.00292937	0.194339	0.202339	0.130178	0.216864	0.0566887
	181.344	0.231307	0.0106324	0.198983	0.203615	0.142727	0.223054	0.0463359
	181.879	0.215506	0.014315	0.199519	0.206367	0.148389	0.227958	0.0422031
	182.414	0.198226	0.0143526	0.202514	0.206119	0.146291	0.227724	0.0432586
	182.949	0.203645	0.0109105	0.205318	0.205162	0.142529	0.235912	0.0393571
	183.484	0.205175	0.00544573	0.217545	0.210789	0.146282	0.236914	0.0364824
	184.019	0.199969	-0.000815547	0.223028	0.208717	0.140957	0.230866	0.0393806
	184.554	0.20815	-0.00565945	0.230711	0.197098	0.139116	0.200122	0.0469167
	185.089	0.222493	-0.0126211	0.236932	0.189712	0.132368	0.171962	0.0515778
	185.624	0.232668	-0.0109523	0.238409	0.186791	0.124569	0.157927	0.0518344
	186.158	0.238312	-0.00838514	0.235557	0.173764	0.121397	0.157169	0.0483267
	186.693	0.239436	-0.00727094	0.226047	0.161222	0.122895	0.143634	0.0445558
	187.228	0.234884	-0.00687264	0.22171	0.161012	0.127228	0.144286	0.0392675
	187.763	0.229335	-0.00821231	0.213823	0.155718	0.139139	0.139887	0.0428698
	188.298	0.23089	-0.00819401	0.209675	0.14599	0.159573	0.146746	0.0411045
	188.833	0.237258	-0.00285244	0.209052	0.135088	0.167844	0.159207	0.0396593
	189.368	0.246629	0.0129921	0.211061	0.12557	0.351969	0.165938	0.0459916
	189.903	0.246899	0.0149454	0.213157	0.113278	0.344105	0.173981	0.0513428
	190.438	0.251514	0.0102401	0.225133	0.112187	0.338949	0.181752	0.0563039
	190.973	0.241032	0.0180783	0.0467099	0.11923	0.334779	0.186582	0.0564539
	191.508	0.233489	0.0199981	0.0272351	0.124317	0.332496	0.191419	0.0607284
	192.043	0.221056	0.0142671	0.0176047	0.132226	0.355775	0.194904	0.0637157
	192.578	0.219632	0.0117904	0.0170194	0.138096	0.379867	0.205058	0.0649904
	193.113	0.227963	0.0115816	0.0249865	0.145484	0.392369	0.21787	0.060001
	193.648	0.237295	0.00872885	0.0358979	0.124864	0.395642	0.230305	0.0525353
	194.183	0.238488	0.0130893	0.0476465	0.131627	0.371646	0.249323	0.041955
	194.717	0.22653	0.0133302	0.051963	0.136203	0.349962	0.25724	0.0318547
	195.252	0.205553	0.0067724	0.0558092	0.138558	0.349531	0.265873	0.0259016
	195.787	0.190014	0.00515509	0.0569961	0.140905	0.376227	0.275874	0.0249674
	196.322	0.199837	-0.000380089	0.0595096	0.147169	0.398751	0.294694	0.0256058
	196.857	0.220165	-0.010638	0.0646809	0.152577	0.409545	0.314657	0.0208063
	197.392	0.231384	-0.0128219	0.0700417	0.153918	0.396175	0.335021	0.0163385
	197.927	0.246224	-0.0220826	0.0696102	0.152474	0.341587	0.341832	0.022907
	198.462	0.270988	-0.025255	0.0659117	0.149087	0.294928	0.335126	0.0292677
	198.997	0.293924	-0.0194931	0.0604687	0.144726	0.257428	0.334174	0.0300545
	199.532	0.329799	-0.0110503	0.0719714	0.137522	0.254255	0.328403	0.0238926
	200.067	0.342024	-0.00453498	0.0917049	0.126993	0.256379	0.307156	0.0170559

## Sheet: acvr1ba+1bb MO+1ba mRNA lateral
	Figure 4 - figure supplement 1
	acvr1b-a-/- + acvr1b-b MO + acvr1b-a mRNA, lateral view
		Background-subtracted and normalized intensity in acvr1b-a-/- + acvr1b-b MO + acvr1b-a mRNA embryos, lateral view
	Distance (µm)	Embryo
		1	2	3	4	5	6	7	8	9	10	11
	0	1.24104	1.62645	1.77063	1.18954	1.05463	1.76439	2.11995	1.53223	1.79974	1.23911	2.31238
	0.534938	1.23691	1.63876	1.79858	1.21381	1.06005	1.75317	2.16838	1.52481	1.84513	1.05312	2.30334
	1.06988	1.21464	1.65125	1.73618	1.22343	1.03297	1.74771	2.16558	1.51429	1.8751	0.975358	2.27792
	1.60481	1.21549	1.60753	1.67303	1.22698	0.904138	1.7413	2.17138	1.51376	1.90434	0.872712	2.26027
	2.13975	1.2283	1.56649	1.63977	1.26529	0.897635	1.76193	2.18467	1.44516	1.92746	0.780233	2.26745
	2.67469	1.24725	1.5372	1.61727	1.28455	0.836564	1.74433	2.18915	1.45557	1.8737	0.739471	2.25717
	3.20963	1.27663	1.52125	1.66157	1.27925	0.795921	1.71915	2.18413	1.48164	1.87381	0.741271	2.14979
	3.74457	1.31648	1.49166	1.66419	1.246	0.738383	1.69514	2.17483	1.47871	1.88457	0.75745	2.05095
	4.27951	1.36885	1.47963	1.6479	1.20468	0.708931	1.6739	2.15106	1.52286	1.86849	0.76131	2.0004
	4.81444	1.4191	1.46655	1.65004	1.17577	0.712311	1.66147	2.12509	1.50654	1.85627	0.748057	2.01708
	5.34938	1.45158	1.45932	1.6957	1.1846	0.697327	1.66632	2.07839	1.48912	1.87252	0.791444	2.00085
	5.88432	1.47352	1.44859	1.77744	1.19244	0.626097	1.61999	2.06126	1.49359	1.88655	0.827451	1.98872
	6.41926	1.49175	1.43397	1.85561	1.20632	0.609548	1.57518	2.01953	1.49933	1.88419	0.873468	1.93569
	6.9542	1.5012	1.40025	1.92624	1.21491	0.595505	1.54029	1.98071	1.5004	1.89743	0.950736	1.91469
	7.48913	1.50116	1.39024	1.94259	1.20775	0.588384	1.51453	1.94797	1.49762	1.92009	0.932195	1.88422
	8.02407	1.49379	1.36779	1.97898	1.17896	0.600749	1.49394	1.94543	1.47306	1.94857	0.889632	1.83843
	8.55901	1.48273	1.32918	2.01883	1.15862	0.606963	1.47564	1.95691	1.42892	1.97746	0.846541	1.73831
	9.09395	1.4633	1.2992	2.0442	1.14953	0.621801	1.47033	1.94647	1.38786	1.99481	0.856919	1.68624
	9.62889	1.43626	1.30094	2.05514	1.16555	0.627406	1.48015	1.94553	1.3544	1.98184	0.903043	1.60694
	10.1638	1.41351	1.28578	2.05428	1.17035	0.62537	1.48676	1.95963	1.34968	1.95348	0.962278	1.52793
	10.6988	1.40255	1.27899	2.08943	1.20273	0.635877	1.51355	1.9812	1.36615	1.9631	0.988431	1.44428
	11.2337	1.39914	1.26831	2.08324	1.23381	0.649652	1.52407	1.9765	1.36961	1.97151	1.00552	1.35272
	11.7686	1.40398	1.24883	2.05073	1.25469	0.681938	1.50064	1.96241	1.33755	1.93509	1.047	1.2891
	12.3036	1.41174	1.25207	2.08083	1.26629	0.715491	1.48363	1.94418	1.32449	1.94119	1.0875	1.23894
	12.8385	1.41916	1.26905	2.11321	1.28377	0.731648	1.47837	1.93265	1.2971	1.95537	1.12824	1.15486
	13.3735	1.43409	1.27095	2.15457	1.2981	0.749385	1.49599	1.9294	1.29695	1.9826	1.2059	1.16216
	13.9084	1.4615	1.28106	2.14397	1.30498	0.771641	1.53071	1.92866	1.3125	1.95594	1.25116	1.11039
	14.4433	1.4836	1.27874	2.09199	1.309	0.816172	1.55189	1.9327	1.30396	1.96807	1.25306	1.02123
	14.9783	1.49362	1.30138	2.01627	1.3049	0.857071	1.53712	1.92635	1.31749	1.96402	1.23127	0.928465
	15.5132	1.4914	1.33152	1.96927	1.28744	0.88897	1.53429	1.89258	1.2859	1.99636	1.22844	0.902693
	16.0481	1.47794	1.35014	1.9524	1.29689	0.921766	1.51615	1.85612	1.31622	2.05056	1.20007	0.92484
	16.5831	1.46541	1.36256	1.9687	1.28846	0.934333	1.5173	1.82872	1.34368	2.03919	1.18838	0.993508
	17.118	1.45441	1.36338	1.97206	1.28139	0.935025	1.51625	1.82002	1.36493	2.0034	1.17027	1.08439
	17.653	1.44018	1.36453	1.98556	1.28884	0.960324	1.52145	1.84298	1.38664	1.95281	1.1411	1.19048
	18.1879	1.42616	1.35658	1.99263	1.27641	0.983045	1.52799	1.86984	1.41111	1.9067	1.10111	1.2945
	18.7228	1.42448	1.34343	1.97748	1.27135	1.01242	1.53896	1.87208	1.43177	1.86807	1.04654	1.2915
	19.2578	1.4328	1.33818	1.92067	1.25166	1.04829	1.55925	1.84009	1.43471	1.83484	1.00522	1.26721
	19.7927	1.42996	1.31887	1.84961	1.2379	1.07758	1.54357	1.82122	1.37912	1.75874	0.978641	1.20348
	20.3276	1.41655	1.27366	1.79076	1.23294	0.990521	1.53051	1.80768	1.37215	1.71889	0.986831	1.16479
	20.8626	1.40147	1.22834	1.78536	1.2226	0.942404	1.50602	1.79231	1.36868	1.6997	1.0153	1.14228
	21.3975	1.40227	1.19709	1.8028	1.19702	0.929241	1.48623	1.77336	1.35946	1.70821	1.02179	1.14311
	21.9325	1.40258	1.18294	1.7875	1.1812	0.91792	1.45671	1.73188	1.32598	1.69511	1.04685	1.13671
	22.4674	1.4016	1.16539	1.7376	1.15859	0.935452	1.42557	1.66793	1.26809	1.69408	1.09372	1.14635
	23.0023	1.39381	1.13945	1.4472	1.12641	0.972338	1.4007	1.64291	1.20284	1.71461	1.10545	1.13575
	23.5373	1.37354	1.10504	1.45332	1.09489	0.98829	1.3468	1.60919	1.11702	1.7338	1.12208	1.15538
	24.0722	1.35069	1.09077	1.46916	1.05909	0.971054	1.29993	1.57954	1.05911	1.73555	1.1269	1.18519
	24.6072	1.32387	1.08425	1.51	0.976108	0.958443	1.26826	1.54855	1.03515	1.72756	1.10397	1.19173
	25.1421	1.29372	1.06837	1.50223	0.911791	0.95505	1.25498	1.53196	1.03755	1.72178	1.02757	1.15525
	25.677	1.28856	1.06263	1.47695	0.863951	0.944617	1.23194	1.52559	1.01737	1.71665	0.996379	1.11222
	26.212	1.29522	1.06792	1.4474	0.844428	0.912734	1.20212	1.50485	1.05112	1.71988	0.958843	1.07479
	26.7469	1.31457	1.06014	1.44371	0.869857	0.904284	1.20274	1.49377	1.07921	1.69289	0.958864	1.12452
	27.2818	1.33468	1.06296	1.47053	0.888176	0.867073	1.19817	1.47448	1.09851	1.65144	0.966916	1.1523
	27.8168	1.35472	1.06754	1.43483	0.873932	0.840534	1.20611	1.46022	1.11491	1.63937	0.983575	1.17784
	28.3517	1.3626	1.06094	1.43155	0.843849	0.827604	1.19811	1.42836	1.15445	1.63871	1.03659	1.17482
	28.8867	1.36626	1.05556	1.43272	0.811823	0.817003	1.20021	1.42773	1.18665	1.63123	1.06909	1.15352
	29.4216	1.36893	1.04511	1.4438	0.798745	0.814704	1.19334	1.43483	1.23138	1.62029	1.05559	1.10936
	29.9565	1.37127	1.01733	1.48614	0.790849	0.799034	1.21713	1.4527	1.28421	1.62987	1.03318	1.06828
	30.4915	1.36926	1.00173	1.50592	0.785552	0.766591	1.23371	1.49343	1.31445	1.63655	1.00856	1.00921
	31.0264	1.36057	1.02193	1.50707	0.808039	0.728674	1.24701	1.5605	1.32544	1.64459	0.961343	0.947969
	31.5614	1.34843	1.03375	1.53851	0.840272	0.704616	1.26186	1.59866	1.30177	1.63044	0.900864	0.880556
	32.0963	1.34005	1.05468	1.54895	0.859908	0.670794	1.28296	1.61703	1.33942	1.61087	0.845758	0.816622
	32.6312	1.32753	1.06392	1.54348	0.878342	0.631191	1.29905	1.61573	1.36922	1.58393	0.808461	0.762046
	33.1662	1.3173	1.08481	1.56535	0.895043	0.618723	1.31206	1.62561	1.40815	1.58759	0.767224	0.73336
	33.7011	1.3121	1.10579	1.58361	0.895686	0.620407	1.29597	1.62787	1.40958	1.62159	0.702711	0.699402
	34.236	1.3145	1.11955	1.57852	0.926452	0.611896	1.24967	1.62748	1.41852	1.65373	0.667891	0.676985
	34.771	1.32628	1.13039	1.52438	0.921536	0.581425	1.22404	1.64061	1.41258	1.6354	0.672421	0.653301
	35.3059	1.33998	1.12655	1.4531	0.935336	0.549314	1.21024	1.61851	1.38406	1.60512	0.682209	0.613532
	35.8409	1.3586	1.12423	1.4343	0.953634	0.531557	1.20602	1.55344	1.32253	1.58856	0.666784	0.571328
	36.3758	1.3795	1.13173	1.41765	0.969362	0.503497	1.19954	1.51782	1.25896	1.57911	0.658009	0.539506
	36.9107	1.398	1.1438	1.40285	0.993577	0.47526	1.18192	1.51347	1.21825	1.54686	0.664661	0.490908
	37.4457	1.42187	1.15231	1.41753	1.00965	0.456248	1.176	1.49914	1.15279	1.53742	0.661848	0.48043
	37.9806	1.44547	1.14833	1.42672	1.027	0.443105	1.17039	1.4665	1.15045	1.53181	0.661561	0.496434
	38.5155	1.46398	1.13095	1.43652	1.05049	0.427894	1.15775	1.42913	1.13675	1.53948	0.665719	0.501553
	39.0505	1.47152	1.12755	1.45924	1.09161	0.418941	1.16234	1.39793	1.10237	1.53614	0.678296	0.483411
	39.5854	1.46986	1.10745	1.44702	1.10019	0.408158	1.11604	1.41496	1.06695	1.50341	0.679757	0.479198
	40.1204	1.46841	1.08007	1.43786	1.1255	0.396515	1.08774	1.43811	1.01343	1.50241	0.670804	0.490341
	40.6553	1.46662	1.04228	1.42262	1.13437	0.398424	1.0642	1.43746	1.01171	1.51419	0.68549	0.52104
	41.1902	1.4618	1.00007	1.45139	1.12452	0.410513	1.03215	1.42099	1.02875	1.51529	0.71938	0.531685
	41.7252	1.46369	0.970374	1.44735	1.12548	0.413142	1.01089	1.42585	1.05562	1.54054	0.744408	0.534401
	42.2601	1.47095	0.943059	1.36066	1.11658	0.426139	0.993746	1.44251	1.0469	1.53334	0.735623	0.602615
	42.7951	1.47659	0.919349	1.30634	1.0658	0.443748	0.969498	1.44449	1.06156	1.52278	0.721643	0.760855
	43.33	1.47704	0.89208	1.50115	1.04028	0.456269	0.965808	1.41934	1.04566	1.50653	0.696877	0.864751
	43.8649	1.4781	0.860003	1.32413	1.02846	0.452156	0.990884	1.3972	1.07132	1.47271	0.692091	0.930256
	44.3999	1.47476	0.839452	1.33085	1.01942	0.447658	1.025	1.39956	1.11878	1.45431	0.696817	0.952856
	44.9348	1.46794	0.820186	1.34807	1.02383	0.44847	1.07413	1.42432	1.14082	1.4644	0.722678	0.952451
	45.4697	1.45197	0.802325	1.32383	1.01142	0.44295	1.10579	1.44999	1.11175	1.45597	0.725467	0.940515
	46.0047	1.43774	0.785419	1.2351	0.985647	0.444129	1.11389	1.45756	1.07274	1.45993	0.731306	0.930475
	46.5396	1.42431	0.771934	1.2481	0.975293	0.451428	1.15229	1.45112	0.975221	1.446	0.732142	0.938371
	47.0746	1.40864	0.738861	1.24074	0.950116	0.47861	1.16637	1.43633	0.957976	1.42705	0.730678	0.925408
	47.6095	1.39786	0.72525	1.20742	0.932051	0.508679	1.16141	1.44308	0.9838	1.43923	0.77566	0.891183
	48.1444	1.39097	0.731334	1.18154	0.909785	0.53619	1.16314	1.43307	1.01573	1.45387	0.762265	0.851973
	48.6794	1.39334	0.726385	1.15983	0.886773	0.560357	1.16121	1.42639	1.034	1.46768	0.740296	0.804704
	49.2143	1.39096	0.745055	1.14699	0.840081	0.560936	1.18942	1.41486	1.07553	1.46153	0.756845	0.748455
	49.7492	1.3839	0.741373	1.14363	0.829217	0.558073	1.19739	1.40439	1.05104	1.44713	0.749101	0.702375
	50.2842	1.37334	0.726769	1.14997	0.805639	0.562901	1.18277	1.40304	1.08579	1.41289	0.734187	0.666443
	50.8191	1.37015	0.755565	1.13274	0.781123	0.564605	1.1585	1.38756	1.12931	1.42012	0.685688	0.63483
	51.3541	1.36037	0.783745	1.11055	0.771761	0.588903	1.14254	1.35925	1.1278	1.41463	0.627778	0.591006
	51.889	1.34355	0.809493	1.13877	0.785499	0.597009	1.11187	1.3115	1.14938	1.41339	0.554341	0.558339
	52.4239	1.32273	0.829016	1.12924	0.802266	0.593056	1.0789	1.28562	1.15098	1.40941	0.504451	0.490225
	52.9589	1.30103	0.850916	1.05432	0.818364	0.58524	1.07572	1.32549	1.22226	1.42323	0.470927	0.388775
	53.4938	1.28953	0.850457	1.09193	0.8088	0.572885	1.02044	1.3142	1.26803	1.4072	0.494708	0.33408
	54.0288	1.28364	0.848223	1.07328	0.803581	0.557927	0.975806	1.2745	1.29117	1.3848	0.496008	0.298716
	54.5637	1.28036	0.860902	1.05428	0.809032	0.542583	0.972778	1.27698	1.24843	1.35115	0.491653	0.296459
	55.0986	1.28588	0.860133	1.02146	0.800389	0.523037	0.976064	1.28233	1.1988	1.29141	0.494538	0.291381
	55.6336	1.29136	0.869716	1.15294	0.784184	0.512309	0.998968	1.27183	1.15941	1.21485	0.491655	0.316193
	56.1685	1.29742	0.878164	1.13615	0.763822	0.504405	1.03901	1.24968	1.06256	1.14958	0.488511	0.342273
	56.7034	1.3005	0.899145	1.12575	0.761766	0.502287	1.03801	1.25288	0.988876	1.1119	0.487394	0.352671
	57.2384	1.29743	0.909933	1.11472	0.792835	0.500347	1.00023	1.24565	0.961849	1.06453	0.501866	0.392136
	57.7733	1.28945	0.928674	1.10985	0.820242	0.491763	0.987192	1.22592	0.942149	1.00504	0.516038	0.422366
	58.3083	1.27391	0.939932	1.09058	0.855374	0.472101	0.980289	1.19599	0.990565	0.950306	0.532332	0.467127
	58.8432	1.25071	0.947622	1.04464	0.868869	0.456314	0.93637	1.17021	0.979067	0.922721	0.529812	0.47303
	59.3781	1.2232	0.952304	1.01589	0.830277	0.420279	0.950939	1.17285	1.01028	0.891784	0.534378	0.512534
	59.9131	1.20221	0.944037	0.988553	0.801508	0.408776	0.967893	1.16203	1.05321	0.889945	0.514956	0.536103
	60.448	1.18722	0.94514	0.953927	0.781396	0.423114	0.967033	1.13601	1.06216	0.884645	0.511452	0.543337
	60.9829	1.17041	0.949909	0.929429	0.782192	0.447756	0.966531	1.12238	1.06466	0.896626	0.519987	0.542785
	61.5179	1.15969	0.960753	0.915166	0.787081	0.458298	0.95531	1.11431	1.03281	0.927155	0.507217	0.548069
	62.0528	1.14193	0.960458	0.919447	0.7632	0.459826	0.930041	1.11209	1.01874	0.956857	0.501483	0.517467
	62.5878	1.12438	0.949618	0.934106	0.731215	0.460793	0.880464	1.1366	0.977169	0.972343	0.495588	0.499372
	63.1227	1.1119	0.921101	0.943067	0.710392	0.461599	0.836778	1.16429	0.973452	0.995996	0.514148	0.483728
	63.6576	1.10356	0.870262	0.924174	0.688839	0.461106	0.800014	1.1902	0.881531	1.01922	0.566358	0.463614
	64.1926	1.10284	0.828215	0.916037	0.66859	0.470691	0.770547	1.20015	0.79263	1.01834	0.588881	0.430466
	64.7275	1.10355	0.778657	0.628139	0.654737	0.481257	0.786314	1.2496	0.790283	1.00789	0.61099	0.388173
	65.2625	1.10604	0.749971	0.604146	0.650873	0.482825	0.799569	1.28814	0.748521	1.00138	0.619668	0.354358
	65.7974	1.11732	0.733695	0.598886	0.684587	0.48474	0.784173	1.30337	0.717536	0.994088	0.637046	0.328177
	66.3323	1.1386	0.720101	0.61021	0.704354	0.486511	0.779107	1.3235	0.762359	0.989191	0.654632	0.309948
	66.8673	1.15123	0.690641	0.613843	0.695407	0.489523	0.750922	1.32583	0.858594	0.992437	0.653018	0.279042
	67.4022	1.14606	0.660235	0.908123	0.68191	0.490989	0.719014	1.33536	0.920429	0.99734	0.639342	0.254548
	67.9371	1.13105	0.657542	0.93507	0.668868	0.488732	0.714294	1.33531	0.935473	0.958069	0.633339	0.240363
	68.4721	1.12174	0.663605	0.957087	0.679132	0.497151	0.708208	1.32432	0.92591	0.948209	0.626346	0.24138
	69.007	1.11276	0.673301	0.984201	0.720868	0.508805	0.699945	1.34571	0.978475	0.970971	0.603052	0.26254
	69.542	1.10615	0.67697	1.00643	0.754888	0.506222	0.690847	1.36179	1.0198	0.964911	0.581534	0.261553
	70.0769	1.10256	0.674003	1.04932	0.767205	0.486381	0.699465	1.3401	1.05529	0.950699	0.588931	0.264616
	70.6118	1.09718	0.671058	1.06679	0.777433	0.479932	0.712623	1.30508	1.04128	0.933882	0.576381	0.294003
	71.1468	1.09671	0.661063	1.0897	0.751628	0.491368	0.730242	1.27638	1.02629	0.928529	0.558776	0.314887
	71.6817	1.099	0.649299	1.09276	0.72632	0.489464	0.73258	1.24042	0.945272	0.939573	0.557689	0.326304
	72.2167	1.09965	0.633952	1.08602	0.701654	0.485217	0.730816	1.20478	0.880933	0.936833	0.593832	0.319942
	72.7516	1.09735	0.609871	1.06586	0.677818	0.476924	0.736639	1.1261	0.821706	0.941448	0.611335	0.313173
	73.2865	1.09474	0.600059	1.05516	0.668177	0.462584	0.715936	1.0536	0.791876	0.934408	0.613718	0.306554
	73.8215	1.09243	0.59025	1.08152	0.66054	0.464253	0.677895	0.998576	0.742033	0.922286	0.610303	0.333038
	74.3564	1.08227	0.576433	1.06345	0.653851	0.476752	0.64926	0.965591	0.67746	0.946218	0.589794	0.346698
	74.8913	1.06363	0.55011	1.00761	0.663108	0.482113	0.63515	0.944654	0.5751	1.00346	0.565521	0.380491
	75.4263	1.03765	0.524773	0.961366	0.684951	0.489417	0.634108	0.939935	0.554811	1.0373	0.56326	0.414078
	75.9612	1.01698	0.497922	0.935174	0.707349	0.492239	0.606361	0.941249	0.55215	1.05039	0.569483	0.409325
	76.4962	1.00491	0.478761	0.901717	0.739022	0.485618	0.60005	0.941664	0.516056	1.05647	0.585117	0.409251
	77.0311	0.99232	0.460369	0.882119	0.765519	0.498766	0.598244	0.956525	0.472404	1.05437	0.576317	0.399407
	77.566	0.981579	0.471022	0.851689	0.793592	0.489329	0.564287	0.960921	0.445077	1.02538	0.564021	0.389369
	78.101	0.976756	0.495403	0.825903	0.826993	0.473889	0.527876	0.966898	0.445916	0.996758	0.566818	0.377291
	78.6359	0.984072	0.517444	0.784153	0.845614	0.473115	0.483246	0.992658	0.486549	0.974299	0.545173	0.375038
	79.1708	0.997155	0.543312	0.74598	0.865588	0.47827	0.434272	1.0104	0.500881	0.948101	0.531409	0.390335
	79.7058	1.00558	0.55926	0.715646	0.864625	0.480475	0.421534	1.02612	0.511625	0.917066	0.504267	0.40614
	80.2407	1.01101	0.562331	0.742245	0.846042	0.472262	0.436628	1.05733	0.515341	0.911451	0.486417	0.404719
	80.7757	1.00873	0.55854	0.773723	0.836895	0.464927	0.456402	1.08293	0.477415	0.888	0.4685	0.371204
	81.3106	1.00066	0.551706	0.792291	0.824901	0.475282	0.485499	1.10063	0.484644	0.846647	0.442195	0.341647
	81.8455	0.98146	0.544132	0.827541	0.810211	0.489004	0.500227	1.11084	0.495285	0.821272	0.434939	0.293633
	82.3805	0.963106	0.533731	0.866034	0.784775	0.512878	0.531569	1.09917	0.457383	0.775378	0.437939	0.249024
	82.9154	0.952258	0.516325	0.85383	0.757034	0.50879	0.541956	1.08274	0.457484	0.747017	0.454883	0.227456
	83.4504	0.942649	0.488092	0.885182	0.722996	0.500705	0.518749	1.05682	0.417572	0.73238	0.445746	0.216353
	83.9853	0.93661	0.475504	0.860666	0.702558	0.516856	0.491283	1.03734	0.369095	0.726562	0.44935	0.206638
	84.5202	0.934789	0.47057	0.847253	0.704927	0.524183	0.487972	1.02762	0.365639	0.703527	0.456183	0.19624
	85.0552	0.924298	0.458564	0.835296	0.695655	0.525429	0.493187	1.00495	0.357092	0.706726	0.469327	0.195346
	85.5901	0.906627	0.444348	0.934185	0.725298	0.53227	0.483823	0.995272	0.370687	0.709494	0.503781	0.182362
	86.125	0.895593	0.4306	0.925863	0.727008	0.52896	0.445444	0.990656	0.394615	0.724797	0.540558	0.17668
	86.66	0.880263	0.427707	0.885703	0.717811	0.515964	0.405005	0.979573	0.449955	0.70256	0.561937	0.188613
	87.1949	0.8645	0.426824	0.909289	0.723546	0.484912	0.374827	0.978162	0.451975	0.706677	0.614196	0.213327
	87.7299	0.855434	0.440236	0.870706	0.745714	0.452579	0.36395	0.973352	0.448098	0.690827	0.636926	0.251962
	88.2648	0.847802	0.454677	0.832128	0.762637	0.430462	0.354885	0.978388	0.443024	0.680203	0.658102	0.255791
	88.7997	0.845453	0.45605	0.582206	0.768567	0.386638	0.34456	1.01854	0.408578	0.693009	0.668732	0.263531
	89.3347	0.840896	0.492162	0.541551	0.757424	0.351724	0.32842	1.03892	0.354279	0.724426	0.661933	0.289971
	89.8696	0.829819	0.520479	0.49069	0.737231	0.332879	0.335093	1.06468	0.351247	0.745876	0.650961	0.283829
	90.4045	0.827749	0.542729	0.463918	0.710808	0.332005	0.334926	1.08662	0.374935	0.755509	0.620175	0.278235
	90.9395	0.822343	0.563953	0.448981	0.683264	0.338469	0.360601	1.09969	0.390285	0.766817	0.581411	0.275529
	91.4744	0.808095	0.589934	0.443192	0.656473	0.333082	0.378814	1.10208	0.41451	0.774457	0.584092	0.25887
	92.0094	0.791808	0.61191	0.435632	0.648007	0.339126	0.389557	1.10935	0.451796	0.778101	0.600823	0.256598
	92.5443	0.785115	0.616169	0.42082	0.633967	0.370762	0.387631	1.12246	0.492897	0.772592	0.599139	0.253822
	93.0792	0.780071	0.607438	0.405569	0.61779	0.39706	0.370538	1.11749	0.540059	0.763072	0.621266	0.227996
	93.6142	0.768181	0.597232	0.403439	0.608965	0.42805	0.376946	1.07895	0.563328	0.761289	0.611817	0.188913
	94.1491	0.758876	0.586406	0.407342	0.607299	0.454536	0.383032	1.04521	0.553487	0.760133	0.610025	0.154414
	94.6841	0.752352	0.558612	0.425566	0.595358	0.477323	0.380563	1.00989	0.510096	0.749859	0.609044	0.137643
	95.219	0.744472	0.522342	0.453483	0.573365	0.493533	0.379274	0.953305	0.499839	0.743388	0.614166	0.127128
	95.7539	0.74064	0.491704	0.489225	0.56118	0.504053	0.370016	0.907727	0.472029	0.750038	0.600113	0.125557
	96.2889	0.750936	0.462483	0.53768	0.554076	0.517411	0.360541	0.874178	0.427074	0.741923	0.586038	0.155615
	96.8238	0.753617	0.451109	0.577126	0.552633	0.53201	0.339666	0.835948	0.4175	0.73523	0.561209	0.18766
	97.3587	0.759134	0.438621	0.589005	0.552499	0.533391	0.314684	0.756321	0.41086	0.732894	0.547608	0.212743
	97.8937	0.759413	0.428819	0.597497	0.550456	0.516262	0.300122	0.701437	0.389347	0.698975	0.526812	0.225605
	98.4286	0.759074	0.411253	0.626287	0.529053	0.498759	0.274501	0.683875	0.348465	0.669329	0.510905	0.248349
	98.9636	0.752825	0.390629	0.654672	0.491155	0.476686	0.248477	0.657491	0.324009	0.665927	0.515035	0.269945
	99.4985	0.746877	0.372293	0.678124	0.451574	0.464652	0.231946	0.62042	0.359766	0.686417	0.537469	0.268029
	100.033	0.743612	0.353849	0.97782	0.406194	0.448954	0.214325	0.600514	0.361053	0.681831	0.533633	0.260696
	100.568	0.727413	0.343876	1.03319	0.372108	0.423822	0.201497	0.601277	0.356373	0.68879	0.52775	0.242854
	101.103	0.717962	0.328246	1.08868	0.353858	0.382424	0.18813	0.618739	0.36151	0.68811	0.5309	0.233492
	101.638	0.715101	0.316643	1.06963	0.344914	0.354023	0.177405	0.639826	0.367971	0.682541	0.54841	0.224134
	102.173	0.715244	0.306452	0.912323	0.349249	0.33578	0.15293	0.649405	0.368254	0.673714	0.580655	0.232239
	102.708	0.716943	0.290342	0.887553	0.361998	0.318715	0.141012	0.661178	0.397049	0.653068	0.603727	0.217058
	103.243	0.718417	0.272639	0.840571	0.374798	0.310928	0.14076	0.665002	0.420173	0.650206	0.617209	0.204213
	103.778	0.720783	0.260758	0.793837	0.404721	0.299286	0.144526	0.668663	0.407625	0.629777	0.621313	0.1892
	104.313	0.720151	0.254522	0.899607	0.449866	0.304751	0.137833	0.688151	0.394657	0.616782	0.573317	0.163165
	104.848	0.723028	0.252205	0.87362	0.487707	0.306652	0.135151	0.680429	0.378013	0.617178	0.562449	0.13083
	105.383	0.719911	0.245911	0.861434	0.518284	0.314603	0.13312	0.681503	0.343031	0.625825	0.552711	0.0971965
	105.918	0.721433	0.2404	0.845548	0.535665	0.31408	0.132567	0.646388	0.327564	0.614985	0.527446	0.0715987
	106.453	0.726203	0.237674	0.904819	0.564428	0.322428	0.145059	0.613322	0.348707	0.605685	0.49246	0.0800897
	106.988	0.731616	0.224167	0.923647	0.590943	0.331941	0.151561	0.610377	0.341157	0.611133	0.451443	0.0910063
	107.523	0.730814	0.209359	0.709914	0.592685	0.35145	0.164898	0.598998	0.329512	0.614882	0.433073	0.100481
	108.058	0.731014	0.190708	0.709005	0.597474	0.36656	0.15661	0.599421	0.32476	0.623414	0.459948	0.103351
	108.592	0.732035	0.164089	0.719981	0.617781	0.382721	0.155753	0.59711	0.300707	0.623897	0.472953	0.116564
	109.127	0.732098	0.133377	0.962888	0.62694	0.391541	0.163369	0.59888	0.243316	0.615589	0.482573	0.14187
	109.662	0.720814	0.114713	0.96013	0.61782	0.385578	0.175111	0.600093	0.225836	0.598149	0.478982	0.149046
	110.197	0.709266	0.107456	0.919855	0.590527	0.389418	0.190264	0.608523	0.235134	0.589777	0.472004	0.130909
	110.732	0.701307	0.10363	0.826071	0.550938	0.385611	0.200097	0.611416	0.231752	0.604237	0.462837	0.101401
	111.267	0.706119	0.0981404	0.719082	0.51319	0.377404	0.200411	0.6423	0.236011	0.608367	0.461367	0.0897898
	111.802	0.709542	0.100975	0.71282	0.475841	0.369108	0.207586	0.626542	0.246666	0.60193	0.453409	0.0830233
	112.337	0.705055	0.105321	0.707847	0.43675	0.369969	0.214462	0.59634	0.251161	0.60503	0.454923	0.0586501
	112.872	0.699568	0.11773	0.707458	0.39884	0.376447	0.203864	0.554964	0.228098	0.599072	0.464452	0.0436823
	113.407	0.695677	0.130527	0.719407	0.365901	0.368872	0.196678	0.50107	0.196224	0.571591	0.495027	0.0401025
	113.942	0.689392	0.123101	0.721171	0.345997	0.361435	0.192897	0.449628	0.194052	0.530573	0.492121	0.0337676
	114.477	0.68423	0.115403	0.716085	0.319882	0.362165	0.184439	0.4229	0.182144	0.485065	0.493424	0.0184488
	115.012	0.680781	0.113904	0.716603	0.323356	0.34842	0.180089	0.405968	0.207857	0.434306	0.487282	0.00316757
	115.547	0.670868	0.114128	0.699429	0.32408	0.337987	0.168494	0.396033	0.232533	0.393398	0.462715	0.0448753
	116.082	0.653754	0.121866	0.685413	0.321035	0.335042	0.14712	0.39319	0.227405	0.380688	0.467745	0.0574776
	116.617	0.633867	0.132499	0.660481	0.312164	0.317439	0.127303	0.391806	0.248262	0.391046	0.476508	0.0539093
	117.151	0.612029	0.138608	0.624949	0.326632	0.298106	0.115204	0.376792	0.270905	0.391607	0.494308	0.0513221
	117.686	0.587774	0.137738	0.556207	0.349504	0.295233	0.113645	0.372265	0.285942	0.385164	0.482266	0.0457084
	118.221	0.562807	0.128883	0.514871	0.374913	0.295695	0.114692	0.366666	0.305949	0.368777	0.486176	0.0502984
	118.756	0.546053	0.120324	0.486917	0.386078	0.290719	0.106642	0.344063	0.295457	0.370293	0.486092	0.064986
	119.291	0.537475	0.105175	0.460501	0.376099	0.293937	0.103278	0.335488	0.314824	0.373961	0.477425	0.0919312
	119.826	0.530144	0.0844561	0.434019	0.374385	0.289946	0.0994789	0.330139	0.298287	0.376397	0.473502	0.101492
	120.361	0.524811	0.0696303	0.41924	0.380198	0.289584	0.102563	0.345148	0.287705	0.367116	0.467149	0.099957
	120.896	0.523988	0.051724	0.677779	0.389026	0.300051	0.108978	0.359316	0.305736	0.34811	0.477236	0.103128
	121.431	0.529962	0.0469084	0.593353	0.39489	0.308902	0.116661	0.370181	0.294194	0.338122	0.49594	0.107252
	121.966	0.532654	0.036748	0.506066	0.396058	0.31682	0.11782	0.367946	0.276982	0.316524	0.485127	0.118513
	122.501	0.533405	0.0196436	0.496952	0.404114	0.315489	0.119633	0.366623	0.231239	0.31313	0.471487	0.128233
	123.036	0.539867	0.0150618	0.395046	0.39966	0.319584	0.124922	0.361404	0.197908	0.307049	0.4795	0.147515
	123.571	0.555682	0.00184471	0.179924	0.391718	0.322581	0.129787	0.362496	0.203859	0.286992	0.483054	0.171332
	124.106	0.568166	-0.0125215	0.172721	0.378774	0.319339	0.124648	0.366143	0.227723	0.276758	0.483696	0.192259
	124.641	0.567401	-0.0114903	0.165642	0.370533	0.327855	0.119461	0.366286	0.296784	0.283491	0.466736	0.208589
	125.176	0.56024	-0.00212866	0.150254	0.351382	0.334169	0.116265	0.356114	0.317995	0.300145	0.437372	0.215171
	125.71	0.551162	0.014427	0.132192	0.334936	0.338393	0.112007	0.362839	0.311908	0.3044	0.412227	0.203911
	126.245	0.548115	0.0302734	0.120853	0.330842	0.343842	0.0992874	0.366156	0.332389	0.28549	0.40638	0.204663
	126.78	0.548166	0.0476998	0.151618	0.322996	0.35227	0.0796012	0.362366	0.353293	0.277649	0.404761	0.204517
	127.315	0.550779	0.0563211	0.158727	0.308038	0.377858	0.0738817	0.361655	0.374088	0.290979	0.396976	0.191537
	127.85	0.551198	0.0574258	0.115229	0.292562	0.404958	0.0677125	0.349782	0.343542	0.296509	0.373183	0.173453
	128.385	0.55432	0.062782	0.0839159	0.275419	0.413397	0.0523327	0.325125	0.326623	0.285456	0.336841	0.147927
	128.92	0.555814	0.0701242	0.0824906	0.273629	0.40859	0.0288001	0.29509	0.331262	0.281009	0.299493	0.108216
	129.455	0.553533	0.0727877	0.0772085	0.293444	0.399041	0.0178649	0.26452	0.336739	0.288816	0.304059	0.0640313
	129.99	0.543924	0.0827832	0.0748515	0.313472	0.38713	0.0255023	0.231142	0.320197	0.308997	0.319262	0.0496897
	130.525	0.540878	0.0959975	0.0895994	0.324602	0.382582	0.0309417	0.217133	0.289536	0.340679	0.369758	0.0509693
	131.06	0.544534	0.10518	0.107307	0.321779	0.377838	0.0337377	0.230248	0.225441	0.358253	0.389151	0.044969
	131.595	0.54536	0.112426	0.121815	0.322063	0.382072	0.0372598	0.231892	0.187715	0.361384	0.389558	0.0624944
	132.13	0.544157	0.106319	0.137355	0.331789	0.362375	0.0516803	0.235544	0.170872	0.363882	0.384675	0.0758879
	132.665	0.535818	0.10586	0.15367	0.342657	0.321533	0.062589	0.229369	0.16425	0.357027	0.392414	0.0883945
	133.2	0.532563	0.0943941	0.161088	0.361631	0.297273	0.0779203	0.23347	0.18435	0.345634	0.397447	0.0872789
	133.735	0.526968	0.082618	0.161508	0.366097	0.298128	0.0806027	0.239176	0.222363	0.325334	0.396056	0.0811854
	134.269	0.518049	0.0828919	0.165343	0.373575	0.282899	0.0862026	0.248934	0.2308	0.309781	0.374135	0.0844953
	134.804	0.504506	0.0854821	0.171828	0.381664	0.270676	0.0877924	0.251364	0.219983	0.291534	0.376397	0.0901908
	135.339	0.480467	0.0864723	0.206476	0.382979	0.274721	0.0845371	0.250415	0.2229	0.280523	0.365354	0.0843117
	135.874	0.461073	0.0893253	0.34221	0.386787	0.257941	0.073451	0.254497	0.240376	0.263641	0.364315	0.0723929
	136.409	0.454246	0.0846154	0.283706	0.385088	0.224462	0.0692165	0.249073	0.290205	0.233604	0.364304	0.0785194
	136.944	0.447652	0.0728721	0.285074	0.377126	0.221201	0.0609361	0.232876	0.317453	0.215499	0.35405	0.0607553
	137.479	0.436999	0.0772899	0.272635	0.375725	0.211845	0.0685101	0.215898	0.329731	0.220115	0.35425	0.0607153
	138.014	0.429069	0.0872047	0.301051	0.364699	0.211687	0.0788621	0.205222	0.340921	0.219041	0.366335	0.0506063
	138.549	0.422268	0.0868754	0.242249	0.368367	0.21227	0.0782857	0.203671	0.341444	0.226339	0.383814	0.0501462
	139.084	0.415957	0.0815646	0.274435	0.357635	0.212233	0.0734986	0.208718	0.33663	0.234871	0.396694	0.0406895
	139.619	0.415973	0.0745399	0.262581	0.348253	0.230181	0.0675533	0.21094	0.310894	0.242241	0.402489	0.0294455
	140.154	0.417648	0.0656689	0.247791	0.355378	0.240134	0.0518591	0.212592	0.269058	0.241705	0.413918	0.0278872
	140.689	0.416484	0.0520348	0.265144	0.348466	0.238889	0.0373586	0.23185	0.263337	0.231629	0.395731	0.018383
	141.224	0.410746	0.0318154	0.245379	0.334136	0.235893	0.0205297	0.239935	0.268343	0.236631	0.389956	0.00664685
	141.759	0.406209	0.0154637	0.254493	0.321212	0.242458	0.0125249	0.251734	0.261646	0.239901	0.384795	0.0150368
	142.294	0.405454	-0.000129339	0.152266	0.315363	0.244755	9.52612e-05	0.238971	0.22632	0.235442	0.368252	0.0076234
	142.828	0.400286	-0.0166243	0.109092	0.303431	0.252247	-0.0094629	0.220545	0.175243	0.228256	0.321566	0.00490984
	143.363	0.393903	-0.0198904	0.0892328	0.302842	0.245721	-0.0176671	0.210645	0.159878	0.216195	0.311339	0.0264292
	143.898	0.387518	-0.0215546	0.369307	0.305924	0.248522	-0.0159532	0.208675	0.135816	0.207156	0.320892	0.03395
	144.433	0.380223	-0.0344442	0.487909	0.299147	0.248099	-0.00842919	0.213176	0.105436	0.212314	0.343517	0.0253906
	144.968	0.37746	-0.038521	0.455762	0.283055	0.250082	-0.00849239	0.215678	0.0963206	0.223571	0.362692	0.023305
	145.503	0.376904	-0.0423102	0.429474	0.27871	0.25718	-0.00852387	0.227814	0.097927	0.236506	0.362434	0.0132558
	146.038	0.372519	-0.0455288	0.408976	0.274999	0.267698	-0.013815	0.233181	0.129671	0.23727	0.357878	-0.00824846
	146.573	0.369704	-0.0420562	0.373182	0.270322	0.273108	-0.015847	0.230648	0.194697	0.210756	0.346243	-0.0149578
	147.108	0.366014	-0.0377208	0.484254	0.27083	0.268601	-0.0201876	0.224524	0.235235	0.191818	0.335833	-0.000209978
	147.643	0.358763	-0.034689	0.571851	0.275241	0.268629	-0.0304648	0.219832	0.244453	0.178392	0.331543	0.0225204
	148.178	0.347459	-0.0336986	0.467648	0.276105	0.26979	-0.0385309	0.214707	0.229132	0.164764	0.313966	0.0545645
	148.713	0.334321	-0.0296663	0.275924	0.273917	0.270288	-0.033764	0.208333	0.196214	0.16209	0.314883	0.0831742
	149.248	0.323354	-0.0189885	0.285248	0.273202	0.256986	-0.0224229	0.206914	0.192704	0.151635	0.32772	0.102711
	149.783	0.312819	-0.00787043	0.0464307	0.258351	0.264465	-0.00303046	0.189218	0.194052	0.155224	0.347616	0.124249
	150.318	0.326291	-0.00301266	0.0511578	0.237963	0.245222	0.00557333	0.168838	0.172243	0.17438	0.374544	0.1506
	150.853	0.32974	0.00320672	0.0469223	0.223106	0.249519	0.0084094	0.158639	0.14749	0.196646	0.355892	0.172941
	151.387	0.331391	0.00271036	0.0380527	0.218866	0.249534	0.00432864	0.160887	0.135042	0.201911	0.360477	0.182672
	151.922	0.332941	-0.00167455	0.0254377	0.205154	0.246487	0.000228733	0.167275	0.112775	0.206785	0.365766	0.188861
	152.457	0.338206	-0.00412533	0.0248141	0.188165	0.236091	-0.00862336	0.171095	0.0873887	0.205276	0.348432	0.178578
	152.992	0.347647	-0.00753616	0.0277478	0.178794	0.21776	-0.0190638	0.179751	0.0967745	0.197982	0.331101	0.153099
	153.527	0.353869	-0.00697238	0.0300789	0.174968	0.208948	-0.0316403	0.183241	0.12205	0.19224	0.304598	0.12128
	154.062	0.35017	0.0107094	0.0228015	0.168648	0.201861	-0.0394631	0.208678	0.153184	0.185579	0.291284	0.108956
	154.597	0.341944	0.0297576	0.0155447	0.170916	0.18082	-0.0292862	0.228339	0.174845	0.182421	0.29185	0.0801641
	155.132	0.45653	0.0437807	0.0113559	0.169296	0.167949	-0.0207106	0.250007	0.174157	0.175066	0.28619	0.0559979
	155.667	0.444118	0.0524408	0.00718375	0.168558	0.162329	-0.0304146	0.247505	0.178183	0.164824	0.273206	0.0356053
	156.202	0.425891	0.0614304	0.00602873	0.155983	0.156538	-0.0420684	0.256031	0.182297	0.160316	0.266285	0.0183151
	156.737	0.402553	0.0701036	0.0105307	0.146842	0.145591	-0.0403372	0.276769	0.159947	0.166572	0.253808	-0.00637745
	157.272	0.373756	0.0712664	0.240819	0.136757	0.148121	-0.0416999	0.279911	0.169572	0.175881	0.239837	-0.0251179
	157.807	0.349621	0.0580045	0.269625	0.140508	0.147502	-0.0451206	0.250468	0.181742	0.185829	0.25086	-0.0268453
	158.342	0.342964	0.0430341	0.194081	0.156047	0.146422	-0.0453408	0.221854	0.224903	0.189429	0.244866	-0.0267745
	158.877	0.333369	0.0346579	0.204508	0.164789	0.150622	-0.0428106	0.209874	0.211369	0.175078	0.228902	-0.027274
	159.412	0.330192	0.023471	0.19596	0.169426	0.160127	-0.0387933	0.186496	0.221555	0.153842	0.216363	-0.0198664
	159.947	0.33559	0.00082668	0.312727	0.172063	0.16796	-0.0475411	0.16365	0.267491	0.14862	0.241347	-0.0266629
	160.481	0.349287	-0.0235358	0.532235	0.176779	0.178793	-0.0568347	0.157828	0.286646	0.143352	0.25473	-0.0166576
	161.016	0.350768	-0.0376955	0.464803	0.180051	0.180416	-0.0710402	0.156661	0.301884	0.136648	0.262408	-0.000679395
	161.551	0.358188	-0.0414267	0.437448	0.177252	0.189858	-0.0709893	0.14238	0.302652	0.133135	0.281027	0.0770864
	162.086	0.373809	-0.0287566	0.374973	0.183093	0.198425	-0.0721065	0.120484	0.284673	0.126338	0.329812	0.0914223
	162.621	0.350628	-0.0194951	0.403104	0.172202	0.209786	-0.0669578	0.10975	0.277303	0.126925	0.355868	0.111439
	163.156	0.323192	-0.00887359	0.326127	0.154622	0.229965	-0.0627487	0.110756	0.229834	0.134418	0.387002	0.114315
	163.691	0.309029	-0.00708169	0.166536	0.129271	0.251786	-0.0593905	0.123073	0.193326	0.13568	0.399365	0.0945123
	164.226	0.304624	-0.00255392	-0.0317897	0.116732	0.269393	-0.0510506	0.134903	0.131446	0.132801	0.408361	0.0726236
	164.761	0.297955	-0.00750645	-0.0329052	0.108015	0.28631	-0.0410304	0.149654	0.113718	0.130804	0.398219	0.0538727
	165.296	0.291973	-0.0138394	0.0616658	0.10717	0.288322	-0.0289797	0.181815	0.0691866	0.133748	0.383845	0.0373458
	165.831	0.291521	-0.0100349	0.0541582	0.114756	0.284499	-0.0175326	0.210229	0.0560417	0.13564	0.359639	0.0219371
	166.366	0.285524	-0.00382512	-0.0443627	0.116561	0.284587	-0.0115662	0.219952	0.0506384	0.141137	0.327959	0.0220876
	166.901	0.313762	-0.00129582	0.042501	0.114143	0.277598	-0.017097	0.231785	0.0551922	0.145315	0.315981	0.0103136
	167.436	0.333222	0.00109221	0.0473059	0.106324	0.261776	-0.0200062	0.224037	0.0642104	0.147	0.323422	0.0463271
	167.971	0.331415	0.00273584	0.593067	0.0901308	0.243678	-0.0164036	0.210866	0.0700228	0.144146	0.296179	0.0616441
	168.506	0.328918	-0.00272452	0.559498	0.0780258	0.235621	-0.0205683	0.198116	0.0748507	0.145516	0.277225	0.0799385
	169.04	0.310319	-0.0176823	0.492195	0.0632515	0.242779	-0.0212694	0.194999	0.0891359	0.148303	0.26705	0.080711
	169.575	0.295983	-0.025599	0.608201	0.0493627	0.234274	-0.0205288	0.18302	0.111126	0.145962	0.249316	0.0799057
	170.11	0.304009	-0.0313122	0.51116	0.0391414	0.222724	-0.0230582	0.171631	0.10814	0.132408	0.235077	0.0651573
	170.645	0.307588	-0.0243769	0.582433	0.0350536	0.203787	-0.0171947	0.163969	0.101292	0.118043	0.214259	0.0313599
	171.18	0.30327	-0.020103	0.666095	0.0438702	0.183837	-0.0183286	0.17407	0.0949755	0.103529	0.1872	0.0182816
	171.715	0.301284	-0.0337392	0.605271	0.0495454	0.173449	-0.0184799	0.181595	0.0857427	0.105161	0.168021	0.0153017
	172.25	0.311941	-0.0355213	0.42203	0.0571093	0.162994	-0.0323411	0.197805	0.0750622	0.113573	0.201453	0.00618672
	172.785	0.321455	-0.034531	0.0535625	0.0683086	0.157922	-0.0487021	0.223424	0.0715713	0.121668	0.228866	0.00655845
	173.32	0.325761	-0.0285267	0.585535	0.0867766	0.149846	-0.0570629	0.228885	0.0756524	0.126535	0.238132	0.0111501
	173.855	0.328762	-0.0335159	0.571931	0.103761	0.138513	-0.0536752	0.22053	0.0811028	0.129154	0.254202	0.00459794
	174.39	0.32459	-0.0478522	0.471687	0.120087	0.133899	-0.0303133	0.210573	0.0770941	0.136597	0.262865	0.00932767
	174.925	0.309817	-0.0514493	0.323701	0.127213	0.133691	-0.0112356	0.204389	0.066779	0.155388	0.279268	0.00599245
	175.46	0.302637	-0.0470559	0.0332193	0.127792	0.138795	0.00764896	0.191545	0.0621124	0.173634	0.307786	0.00283525
	175.995	0.31343	-0.0452427	0.0408318	0.127234	0.141425	0.0147934	0.185917	0.06219	0.187796	0.323058	-0.00857875
	176.53	0.330098	-0.0488335	0.0408716	0.132021	0.14447	0.0158208	0.181154	0.0571192	0.202889	0.34284	-0.0215528
	177.065	0.354161	-0.0508327	0.044645	0.140045	0.146233	0.012552	0.178998	0.0573464	0.220763	0.361899	-0.0213077
	177.599	0.36965	-0.0560616	0.0476826	0.144584	0.151608	0.012162	0.174382	0.0581954	0.238004	0.37744	-0.00743717
	178.134	0.385635	-0.109417	0.0427726	0.144158	0.154506	0.0257206	0.166717	0.0689978	0.249832	0.381064	0.00242723
	178.669	0.399812	-0.098143	0.040163	0.136598	0.156672	0.0292106	0.160362	0.0795686	0.250867	0.364945	0.0194482
	179.204	0.406796	-0.0843742	0.0407082	0.126142	0.156467	0.0389288	0.155237	0.0809785	0.25666	0.351592	0.0407399
	179.739	0.411014	-0.074915	0.0405243	0.119151	0.15376	0.0422559	0.150264	0.0886326	0.261688	0.345933	0.0576617
	180.274	0.418298	-0.0741656	0.0423797	0.112383	0.145609	0.047282	0.143016	0.100061	0.274022	0.325639	0.0716916
	180.809	0.432189	-0.0745387	0.0405738	0.103446	0.147577	0.0528935	0.134827	0.1007	0.279246	0.309529	0.0816252
	181.344	0.4483	-0.0723509	0.0439204	0.0953568	0.151155	0.0564683	0.121813	0.0910814	0.276939	0.276885	0.0847528
	181.879	0.460537	-0.0666417	-0.0239013	0.0871516	0.154171	0.0675742	0.10843	0.0850628	0.272036	0.24939	0.103228
	182.414	0.465593	-0.0553852	-0.022372	0.0757043	0.149441	0.0782928	0.0919409	0.0834788	0.254832	0.213275	0.0869027
	182.949	0.466772	-0.05075	-0.0257868	0.0755818	0.145659	0.0833072	0.0805946	0.0782515	0.243688	0.17477	0.0692095
	183.484	0.472758	-0.0430674	-0.0240582	0.0844242	0.142121	0.0790745	0.0730737	0.0679721	0.236444	0.156124	0.0615947
	184.019	0.473329	-0.0429894	-0.026382	0.0811868	0.139115	0.0635188	0.074611	0.0710832	0.229505	0.15753	0.0385794
	184.554	0.467434	-0.0507675	-0.0240421	0.0846266	0.143092	0.0529737	0.0813199	0.0736185	0.232032	0.157807	0.00190221
	185.089	0.465508	-0.0521916	-0.0175707	0.0924403	0.150355	0.0401845	0.0807857	0.0679275	0.217636	0.158776	-0.02522
	185.624	0.480905	-0.0444755	-0.013113	0.0836359	0.160873	0.022997	0.0857009	0.058463	0.196868	0.170055	-0.0558854
	186.158	0.49547	-0.0375798	-0.0128198	0.082712	0.17682	0.0134513	0.1079	0.0656609	0.182517	0.175216	-0.0762816
	186.693	0.507708	-0.0336092	-0.00672936	0.085471	0.183231	0.00639487	0.132051	0.0646181	0.172746	0.177251	-0.108953
	187.228	0.520748	-0.0370539	0.0524378	0.0893132	0.186413	-0.00403443	0.151783	0.0613798	0.161536	0.178011	-0.130464
	187.763	0.535375	-0.0471523	0.0478139	0.0925997	0.191409	-0.0112771	0.157387	0.0629505	0.148991	0.175307	-0.133548
	188.298	0.54963	-0.0681944	0.0413247	0.0949977	0.198991	-0.0179898	0.159263	0.0588295	0.141068	0.180046	-0.127627
	188.833	0.568537	-0.0831715	0.0341821	0.0990232	0.217738	-0.0283319	0.150008	0.057884	0.123329	0.181308	-0.122894
	189.368	0.586954	-0.100004	0.020403	0.102022	0.239261	-0.0286077	0.146401	0.0534748	0.116603	0.195338	-0.111627
	189.903	0.591399	-0.1119	0.0177513	0.104425	0.251979	-0.0403622	0.140337	0.0507722	0.105939	0.215818	-0.102945
	190.438	0.60585	-0.116675	0.02562	0.102115	0.255693	-0.0268656	0.130538	0.051843	0.0978757	0.234174	-0.0978486
	190.973	0.618363	-0.118362	0.0331351	0.0906953	0.253144	-0.00771324	0.126594	0.0512081	0.0914759	0.240512	-0.0855838
	191.508	0.632739	-0.120617	0.0428882	0.0761271	0.243596	0.00919278	0.124554	0.0452963	0.0871088	0.24306	-0.0771257
	192.043	0.653028	-0.124569	0.0496181	0.0692069	0.233447	0.0244468	0.112081	0.033338	0.0885548	0.247317	-0.0712497
	192.578	0.677637	-0.118701	0.0581931	0.064602	0.212412	0.0361392	0.102191	0.0321483	0.107306	0.261234	-0.0624269
	193.113	0.67742	-0.0991633	0.0646572	0.0583437	0.188461	0.0478976	0.092381	0.0363365	0.126801	0.289123	-0.0433071
	193.648	0.658604	-0.0833952	0.0653168	0.051882	0.175539	0.05779	0.0878682	0.0376842	0.130445	0.297876	-0.0243385
	194.183	0.640369	-0.0850737	0.0743076	0.0444161	0.166488	0.0535919	0.0913955	0.040458	0.122964	0.282125	-0.00954116
	194.717	0.636458	-0.0923621	0.0805729	0.0412234	0.158336	0.0469182	0.102185	0.0561546	0.126728	0.257848	-0.00720549
	195.252	0.651518	-0.085215	0.0769328	0.0396966	0.144333	0.0295542	0.109716	0.068693	0.129412	0.238859	-0.00883902
	195.787	0.666272	-0.0701426	0.0712652	0.0439316	0.133589	0.0224084	0.114902	0.0762694	0.133489	0.214898	-0.00922004
	196.322	0.675655	-0.0455438	0.0674464	0.0468448	0.120361	0.0204763	0.115156	0.0765476	0.137572	0.195728	-0.0152582
	196.857	0.67361	-0.0189057	0.0695618	0.0518564	0.107877	0.034555	0.116752	0.0748971	0.136227	0.187321	-0.0213035
	197.392	0.646382	0.00382103	0.0794335	0.0682023	0.109327	0.0408795	0.124931	0.0766283	0.140518	0.174622	-0.0234336
	197.927	0.635395	0.0173316	0.0793639	0.0871456	0.105099	0.0411057	0.133841	0.075575	0.15407	0.173506	-0.0408646
	198.462	0.626238	0.0127413	0.0723422	0.0967449	0.0981227	0.0439241	0.135295	0.0729148	0.15795	0.169084	-0.0577107
	198.997	0.624027	0.00774506	0.0698387	0.0910106	0.088235	0.0401062	0.136645	0.0670391	0.177808	0.149625	-0.0732308
	199.532	0.618808	0.00534506	0.078814	0.0807771	0.103406	0.0232086	0.194811	0.0705435	0.196005	0.15232	-0.0844196
	200.067	0.619978	0.00723239	0.0950072	0.0730236	0.121063	0.0136385	0.184432	0.0788289	0.202692	0.1663	-0.0893988

## Sheet: acvr1ba+1bb MO+1ba mRNA dorsal
	Figure 4 - figure supplement 1
	acvr1b-a-/- + acvr1b-b MO + acvr1b-a mRNA, dorsal view
		Background-subtracted and normalized intensity in acvr1b-a-/- + acvr1b-b MO + acvr1b-a mRNA embryos, dorsal view
	Distance (µm)	Embryo
		1	2	3	4	5	6	7	8	9
	0	3.12778	1.64989	2.03557	0.736987	2.60998	2.40587	1.6975	1.03551	2.97017
	0.534938	3.11438	1.65525	2.03874	0.748753	2.60975	2.47865	1.63093	1.04476	2.89781
	1.06988	3.08789	1.65838	2.02846	0.712257	2.60994	2.57726	1.6511	1.03662	2.84322
	1.60481	3.0542	1.6636	2.01237	0.70316	2.60998	2.53983	1.68044	1.0038	2.73405
	2.13975	3.01099	1.66555	1.99336	0.683136	2.60998	2.46521	1.68354	0.926567	2.67038
	2.67469	2.97985	1.66681	1.9698	0.690715	2.60943	2.38409	1.66104	0.867666	2.62097
	3.20963	3.02057	1.66678	1.94915	0.68671	2.6092	2.33259	1.62782	0.830268	2.52484
	3.74457	3.07447	1.66459	1.94059	0.728696	2.60986	2.33205	1.6093	0.789745	2.42386
	4.27951	3.0729	1.66108	1.93343	0.749324	2.60865	2.34094	1.61	0.769874	2.28614
	4.81444	3.0883	1.65914	1.93533	0.76974	2.60956	2.31863	1.63121	0.760117	2.17331
	5.34938	3.05724	1.65039	1.92567	0.781613	2.60981	2.29317	1.65956	0.800399	2.04707
	5.88432	3.08409	1.63153	1.90523	0.777451	2.60234	2.30072	1.67797	0.841832	1.93089
	6.41926	3.12	1.61475	1.91101	0.772146	2.60846	2.28266	1.67133	0.848135	1.82747
	6.9542	3.13547	1.58891	1.89257	0.789785	2.60314	2.28702	1.67107	0.878031	1.79197
	7.48913	3.13995	1.57464	1.91268	0.802733	2.58734	2.31815	1.66015	0.914978	1.80909
	8.02407	3.13706	1.58279	1.89627	0.80116	2.56523	2.29719	1.66739	0.958547	1.91737
	8.55901	3.11888	1.56525	1.89504	0.790346	2.55109	2.30205	1.67048	0.998184	2.06083
	9.09395	3.12001	1.54819	1.92836	0.770426	2.52729	2.2834	1.65734	1.01032	2.23311
	9.62889	3.11767	1.54213	1.89544	0.741357	2.49168	2.26831	1.59245	1.02253	2.34587
	10.1638	3.1065	1.49998	1.90301	0.691008	2.41217	2.2598	1.5314	1.02571	2.5152
	10.6988	3.05864	1.49774	1.97927	0.609925	2.45206	2.24508	1.51106	1.01774	2.65227
	11.2337	2.97238	1.49957	1.96813	0.544881	2.40189	2.23028	1.53051	0.98656	2.78661
	11.7686	2.92211	1.52852	1.95531	0.52549	2.40679	2.18171	1.5289	0.95889	2.81119
	12.3036	2.88797	1.59587	1.93462	0.512011	2.4802	2.18072	1.52567	0.924368	2.77793
	12.8385	2.85072	1.62069	1.91106	0.490717	2.46114	2.14412	1.51217	0.932013	2.77137
	13.3735	2.76932	1.63489	1.91559	0.462007	2.46638	2.16073	1.53933	0.971133	2.7461
	13.9084	2.76608	1.6429	1.9334	0.441371	2.49322	2.17416	1.5334	1.01686	2.72071
	14.4433	2.7631	1.64393	1.94253	0.421342	2.49892	2.21497	1.53844	1.03027	2.7422
	14.9783	2.7191	1.64038	1.93704	0.412835	2.50236	2.26568	1.5336	1.02899	2.77045
	15.5132	2.6305	1.63116	1.92589	0.455755	2.4624	2.31937	1.54161	1.02425	2.70624
	16.0481	2.64172	1.6159	1.90902	0.485922	2.50933	2.36727	1.55325	1.0011	2.60283
	16.5831	2.66056	1.59989	1.89594	0.523949	2.49018	2.37066	1.53907	0.967315	2.42847
	17.118	2.68939	1.56755	1.88297	0.563753	2.51544	2.32398	1.5511	0.972582	2.25867
	17.653	2.70738	1.54087	1.86513	0.605769	2.4917	2.25666	1.63922	0.991548	2.08682
	18.1879	2.7468	1.51565	1.8453	0.712066	2.53044	2.1793	1.64603	0.986654	1.94045
	18.7228	2.85322	1.4835	1.84893	0.827491	2.51812	2.11043	1.66152	0.971068	1.99746
	19.2578	2.91285	1.45605	1.87476	0.90858	2.46188	2.04032	1.6522	0.965391	2.02464
	19.7927	2.95379	1.47548	1.91378	0.952787	2.45534	2.01312	1.66254	0.962066	2.06583
	20.3276	2.97394	1.49952	1.95076	0.984439	2.45231	1.97914	1.66441	0.968554	2.18214
	20.8626	2.98164	1.51125	1.97057	0.988132	2.44722	2.01175	1.64948	0.975748	2.30698
	21.3975	2.99485	1.51847	1.97821	1.02077	2.45346	1.99711	1.66279	0.962494	2.3139
	21.9325	3.00188	1.51911	1.99261	0.996701	2.45706	2.05658	1.61807	0.956314	2.28617
	22.4674	2.98696	1.5155	2.01267	0.946727	2.47381	2.11478	1.64078	0.95732	2.35724
	23.0023	2.9487	1.5152	2.02642	0.888898	2.48687	2.15957	1.62348	0.949121	2.43774
	23.5373	2.91604	1.51557	2.04492	0.844405	2.46047	2.18191	1.58999	0.931285	2.45953
	24.0722	2.8754	1.49704	2.06735	0.815083	2.44348	2.27341	1.56624	0.896048	2.39418
	24.6072	2.86668	1.48998	2.08158	0.802574	2.42059	2.34962	1.55736	0.863194	2.31591
	25.1421	2.89002	1.49751	2.08836	0.767319	2.38199	2.3879	1.5485	0.829555	2.20722
	25.677	2.88809	1.49636	2.09952	0.699613	2.37398	2.43243	1.57408	0.819275	2.24663
	26.212	2.90169	1.50174	2.1073	0.637136	2.32614	2.41124	1.61155	0.824921	2.39129
	26.7469	2.90189	1.50366	2.10607	0.59037	2.30193	2.39308	1.60884	0.813569	2.38384
	27.2818	2.89072	1.50287	2.09936	0.519201	2.33802	2.27695	1.59055	0.82011	2.30444
	27.8168	2.94051	1.50712	2.08997	0.481795	2.29788	2.20436	1.58476	0.83556	2.26485
	28.3517	2.96944	1.51519	2.07402	0.446821	2.25029	2.17291	1.5565	0.865099	2.20447
	28.8867	3.00908	1.53869	2.05721	0.428766	2.2274	2.15421	1.54038	0.86549	2.13897
	29.4216	2.98747	1.55965	2.03844	0.441893	2.21851	2.16668	1.54634	0.803489	2.16786
	29.9565	2.96777	1.58537	2.019	0.470211	2.28346	2.13362	1.5333	0.763308	2.20213
	30.4915	2.93991	1.60465	2.00565	0.4921	2.39005	2.09445	1.55179	0.726575	2.23832
	31.0264	2.93553	1.60634	1.99224	0.554147	2.39887	2.06573	1.55661	0.707238	2.25526
	31.5614	2.90034	1.59741	1.97924	0.648019	2.36797	2.02392	1.55764	0.69771	2.24447
	32.0963	2.91213	1.57877	1.96587	0.740435	2.37053	2.04959	1.54779	0.687303	2.207
	32.6312	2.9805	1.55213	1.94094	0.792598	2.39052	2.10824	1.52706	0.67667	2.16988
	33.1662	3.02812	1.52055	1.94058	0.796553	2.41492	2.13501	1.53038	0.647172	2.05604
	33.7011	3.04638	1.47467	1.93143	0.849749	2.47673	2.12286	1.55453	0.628403	2.02786
	34.236	3.02976	1.47713	1.90976	0.873819	2.45489	2.09606	1.59572	0.649201	1.94795
	34.771	3.01605	1.49947	1.85993	0.914976	2.45494	2.02129	1.5889	0.704513	1.90591
	35.3059	2.98991	1.50056	1.81889	0.973002	2.48057	1.95657	1.59921	0.759835	1.81464
	35.8409	2.94156	1.49841	1.76807	1.02472	2.4442	1.90028	1.59198	0.791791	1.75316
	36.3758	2.94906	1.49941	1.74439	1.0403	2.38204	1.86052	1.54657	0.840624	1.69877
	36.9107	2.94012	1.48725	1.69935	1.00974	2.27773	1.85466	1.54547	0.931465	1.69434
	37.4457	2.94046	1.50154	1.60981	0.966932	2.22871	1.85916	1.56726	0.99816	1.75824
	37.9806	2.96121	1.5049	1.62476	0.881986	2.20437	1.79718	1.5988	1.00842	1.86694
	38.5155	2.96378	1.50811	1.63003	0.831229	2.08071	1.73709	1.58996	0.969121	1.93024
	39.0505	2.94655	1.49437	1.68042	0.787643	2.0768	1.65971	1.59404	0.944721	2.02396
	39.5854	2.93288	1.50768	1.75309	0.776447	2.0748	1.66368	1.59124	0.923257	2.12574
	40.1204	2.88868	1.50978	1.79173	0.752962	2.04049	1.70519	1.5806	0.889768	2.21297
	40.6553	2.86747	1.47587	1.79684	0.724117	1.96764	1.70061	1.55134	0.8677	2.18191
	41.1902	2.794	1.39717	1.82256	0.690539	1.99831	1.70367	1.49347	0.849481	2.14905
	41.7252	2.77345	1.37592	1.84732	0.685033	2.035	1.70741	1.50715	0.81856	2.14172
	42.2601	2.78305	1.37861	1.85961	0.734589	2.04517	1.74786	1.54089	0.805925	2.1222
	42.7951	2.82178	1.39652	1.87184	0.746833	2.02919	1.81253	1.56372	0.792346	2.07453
	43.33	2.8585	1.42155	1.89399	0.805852	2.04521	1.9145	1.58279	0.810153	2.02431
	43.8649	2.84509	1.45881	1.91276	0.881897	2.09076	2.01995	1.59081	0.842323	1.97416
	44.3999	2.75907	1.49033	1.9124	0.946742	2.11753	2.11789	1.61633	0.912987	1.9706
	44.9348	2.73421	1.53918	1.89824	0.983394	2.11692	2.18162	1.61681	0.910595	2.12237
	45.4697	2.72091	1.60038	1.88236	1.0338	2.12835	2.21823	1.5941	0.908313	2.13755
	46.0047	2.7018	1.62039	1.85903	1.03214	2.10801	2.262	1.56437	0.889508	2.09064
	46.5396	2.70004	1.62871	1.8237	1.08766	2.12367	2.28622	1.50828	0.903315	1.98304
	47.0746	2.68709	1.63663	1.78343	1.13424	2.11737	2.28955	1.46801	0.888612	1.87765
	47.6095	2.65063	1.63481	1.74791	1.16336	2.11006	2.2428	1.45251	0.891357	1.82367
	48.1444	2.65293	1.62452	1.72542	1.15956	2.09649	2.2046	1.42057	0.870911	1.77507
	48.6794	2.74124	1.61285	1.68911	1.11359	2.05509	2.16402	1.43176	0.864365	1.73805
	49.2143	2.76141	1.61611	1.67288	1.07478	1.98153	2.10723	1.41991	0.846625	1.66751
	49.7492	2.75871	1.62557	1.63806	1.03645	1.98365	2.07354	1.39622	0.822497	1.59794
	50.2842	2.75849	1.62382	1.6022	1.03571	2.00574	2.06067	1.4135	0.811209	1.58622
	50.8191	2.72233	1.61963	1.61055	0.978702	1.92789	2.05853	1.44932	0.833587	1.58195
	51.3541	2.7116	1.61808	1.60191	0.864845	1.83724	2.03245	1.48056	0.852616	1.58165
	51.889	2.71123	1.60827	1.59529	0.762361	1.82109	2.00834	1.50433	0.847123	1.59954
	52.4239	2.69135	1.5812	1.61032	0.677553	1.82653	2.01965	1.52563	0.844868	1.62478
	52.9589	2.65973	1.55375	1.64046	0.601027	1.86849	1.98717	1.5476	0.835451	1.62542
	53.4938	2.62791	1.54292	1.65956	0.536487	1.82712	1.95954	1.53403	0.803612	1.5516
	54.0288	2.60348	1.49761	1.67504	0.483727	1.6798	1.94871	1.57901	0.783616	1.45726
	54.5637	2.60196	1.45964	1.70684	0.454411	1.54114	1.87013	1.58606	0.775775	1.33633
	55.0986	2.61285	1.42294	1.71759	0.444084	1.43437	1.75787	1.58744	0.749448	1.26976
	55.6336	2.60296	1.39861	1.7559	0.460007	1.41839	1.68134	1.57615	0.711845	1.11017
	56.1685	2.58837	1.40127	1.77387	0.508252	1.39335	1.68035	1.51518	0.670872	1.01956
	56.7034	2.59303	1.41755	1.7665	0.564058	1.35661	1.67604	1.45432	0.636217	1.02661
	57.2384	2.60775	1.40149	1.77138	0.632676	1.22101	1.65333	1.39215	0.634315	1.0192
	57.7733	2.64085	1.3792	1.75219	0.67835	1.212	1.62405	1.36838	0.603575	1.05278
	58.3083	2.6615	1.36072	1.77614	0.743705	1.2565	1.59397	1.36728	0.548237	1.18898
	58.8432	2.65867	1.32766	1.79075	0.776813	1.27791	1.6027	1.36812	0.517155	1.24827
	59.3781	2.66965	1.31319	1.7841	0.812394	1.26377	1.63506	1.33778	0.493778	1.29488
	59.9131	2.64216	1.34516	1.76423	0.859431	1.23658	1.65123	1.33472	0.522946	1.32238
	60.448	2.58819	1.3784	1.73369	0.872482	1.19221	1.67625	1.29971	0.560654	1.3509
	60.9829	2.54584	1.39593	1.69116	0.862054	1.17653	1.73141	1.31082	0.553929	1.37634
	61.5179	2.50811	1.38183	1.65729	0.822464	1.19902	1.75274	1.34705	0.561768	1.37875
	62.0528	2.48328	1.37823	1.66815	0.804681	1.27034	1.69879	1.37343	0.578254	1.46828
	62.5878	2.53567	1.39018	1.643	0.76941	1.38096	1.6066	1.4189	0.553867	1.57019
	63.1227	2.57435	1.39454	1.58618	0.745751	1.43722	1.4866	1.47697	0.518362	1.6081
	63.6576	2.58905	1.40772	1.53994	0.730481	1.43188	1.38759	1.49295	0.492715	1.60929
	64.1926	2.61757	1.42078	1.51996	0.700847	1.42616	1.33089	1.54072	0.448044	1.57465
	64.7275	2.61417	1.39863	1.53219	0.663289	1.42214	1.29644	1.56167	0.390367	1.5228
	65.2625	2.59426	1.34444	1.54558	0.665326	1.4231	1.23972	1.5915	0.393158	1.51246
	65.7974	2.55045	1.33948	1.55665	0.657168	1.3826	1.25146	1.59078	0.442155	1.55677
	66.3323	2.5748	1.36811	1.59444	0.65212	1.35019	1.29565	1.56094	0.467638	1.57693
	66.8673	2.58837	1.39853	1.63312	0.637403	1.29967	1.26252	1.52584	0.480661	1.60405
	67.4022	2.59642	1.46674	1.64461	0.62908	1.18328	1.26681	1.50614	0.505718	1.54416
	67.9371	2.56637	1.52298	1.64767	0.5685	1.08401	1.31402	1.49567	0.608623	1.44372
	68.4721	2.53837	1.56014	1.66289	0.514771	1.01481	1.38229	1.46616	0.640114	1.29742
	69.007	2.50049	1.58455	1.64263	0.483938	1.01318	1.43794	1.4307	0.646402	1.17658
	69.542	2.44896	1.61368	1.63432	0.465742	0.977914	1.48539	1.3961	0.629762	1.07879
	70.0769	2.43332	1.63197	1.5972	0.457407	1.01176	1.5661	1.34689	0.611017	0.97722
	70.6118	2.395	1.64527	1.5255	0.462636	1.03397	1.6017	1.33407	0.580257	0.889963
	71.1468	2.3606	1.64812	1.4667	0.507033	1.07171	1.61148	1.32151	0.570636	0.860761
	71.6817	2.32954	1.63096	1.4434	0.553677	1.06755	1.63537	1.31447	0.588812	0.850732
	72.2167	2.28188	1.61342	1.47363	0.571069	1.04087	1.67067	1.32976	0.54602	0.83162
	72.7516	2.25594	1.58296	1.48131	0.59267	1.03256	1.69239	1.31681	0.47413	0.836834
	73.2865	2.16285	1.55328	1.49458	0.611817	1.0151	1.69942	1.27274	0.408364	0.920686
	73.8215	2.04675	1.51804	1.51506	0.614273	0.961356	1.68481	1.2357	0.36585	1.07829
	74.3564	1.95605	1.47269	1.52188	0.629306	0.8485	1.62165	1.23756	0.323444	1.16051
	74.8913	1.88628	1.4302	1.53367	0.627735	0.755445	1.49321	1.26375	0.299136	1.19908
	75.4263	1.90543	1.39495	1.53044	0.662174	0.704262	1.40498	1.28408	0.345819	1.25311
	75.9612	2.0052	1.34174	1.54491	0.689856	0.683789	1.3361	1.26467	0.404556	1.2469
	76.4962	2.03942	1.31455	1.54335	0.697785	0.66343	1.2683	1.2363	0.473703	1.25715
	77.0311	2.04676	1.29842	1.57087	0.660846	0.671783	1.28307	1.26652	0.512994	1.24773
	77.566	2.04124	1.30705	1.54973	0.626443	0.663993	1.29583	1.26715	0.574398	1.23085
	78.101	2.00107	1.31939	1.49063	0.620737	0.642203	1.30016	1.23673	0.656121	1.20616
	78.6359	1.9429	1.302	1.44543	0.611824	0.615707	1.3208	1.22286	0.688109	1.18563
	79.1708	1.94634	1.28188	1.42053	0.581406	0.594764	1.33474	1.23648	0.657785	1.19092
	79.7058	1.82601	1.27861	1.44205	0.643646	0.621668	1.34993	1.23206	0.613848	1.22727
	80.2407	1.87541	1.32184	1.51636	0.692827	0.666741	1.39115	1.24704	0.641744	1.26486
	80.7757	1.92996	1.40339	1.5049	0.725035	0.724425	1.46165	1.24776	0.628248	1.30083
	81.3106	1.98104	1.4461	1.45913	0.732457	0.736503	1.50036	1.23462	0.619857	1.26543
	81.8455	2.01372	1.47745	1.44668	0.766725	0.745308	1.50173	1.2313	0.628716	1.19241
	82.3805	2.11829	1.486	1.44818	0.83071	0.776505	1.48411	1.20889	0.618259	1.11441
	82.9154	2.11732	1.47048	1.43559	0.867072	0.818269	1.4933	1.21329	0.636623	1.05123
	83.4504	2.09372	1.46225	1.40961	0.886949	0.844297	1.494	1.18846	0.651417	0.995257
	83.9853	2.10097	1.46061	1.3511	0.889571	0.854835	1.46277	1.15243	0.620898	0.95878
	84.5202	2.13265	1.4536	1.31259	0.885378	0.840539	1.37129	1.12439	0.58489	0.888001
	85.0552	2.18504	1.44195	1.28753	0.893162	0.796199	1.29115	1.06357	0.518842	0.846353
	85.5901	2.19588	1.39941	1.32617	0.89292	0.730283	1.22938	0.950995	0.487454	0.807652
	86.125	2.20188	1.33872	1.36974	0.883748	0.647844	1.12389	0.875383	0.464154	0.821845
	86.66	2.18993	1.29544	1.42368	0.891397	0.591723	0.989134	0.792887	0.418381	0.839174
	87.1949	2.16464	1.30291	1.45204	0.895485	0.54518	0.894493	0.726205	0.389894	0.866018
	87.7299	2.17235	1.27127	1.47371	0.880227	0.446671	0.842908	0.679968	0.348969	0.889411
	88.2648	2.15611	1.24144	1.48848	0.849849	0.358514	0.824608	0.65778	0.270768	0.924584
	88.7997	2.09094	1.2387	1.48821	0.806941	0.313357	0.81475	0.621402	0.228355	0.914667
	89.3347	2.03873	1.2337	1.48142	0.756521	0.277244	0.826864	0.667775	0.238933	0.929959
	89.8696	2.04605	1.26517	1.46751	0.688119	0.234685	0.818053	0.713647	0.24411	0.948494
	90.4045	2.02223	1.32805	1.44916	0.574228	0.251988	0.852383	0.807714	0.223615	0.951832
	90.9395	1.98373	1.35679	1.43711	0.512944	0.30305	0.893751	0.870439	0.219079	0.960707
	91.4744	1.93193	1.36986	1.38711	0.482697	0.35907	0.955188	0.907564	0.19048	0.975403
	92.0094	1.86991	1.36523	1.3426	0.452115	0.360814	1.0177	0.957766	0.168183	0.962432
	92.5443	1.84839	1.36784	1.31874	0.419386	0.348623	1.03743	1.07896	0.216723	0.912479
	93.0792	1.86588	1.34616	1.29181	0.401135	0.302777	1.04027	1.20303	0.30668	0.870012
	93.6142	1.89759	1.35151	1.26683	0.464394	0.268686	1.04392	1.25795	0.313864	0.849723
	94.1491	1.92748	1.38983	1.25557	0.514282	0.2949	1.04394	1.26061	0.344258	0.809471
	94.6841	1.93978	1.39783	1.26854	0.559112	0.318393	1.02701	1.25001	0.406382	0.796616
	95.219	1.93982	1.3719	1.29831	0.636341	0.272033	0.988549	1.22226	0.45901	0.732375
	95.7539	1.88797	1.35815	1.32801	0.693595	0.263894	0.929236	1.22407	0.50507	0.692332
	96.2889	1.79419	1.33105	1.37828	0.731797	0.301666	0.917965	1.24357	0.533741	0.646037
	96.8238	1.80376	1.28251	1.42111	0.778582	0.347558	0.9124	1.24113	0.583353	0.653854
	97.3587	1.80961	1.22413	1.44065	0.819396	0.369028	0.853047	1.22376	0.580584	0.660294
	97.8937	1.84469	1.17202	1.44411	0.857471	0.338414	0.810699	1.14416	0.550521	0.638536
	98.4286	1.86528	1.11662	1.46686	0.862194	0.304113	0.731329	1.07852	0.536017	0.645735
	98.9636	1.88776	1.01799	1.4944	0.838766	0.302855	0.669429	1.02545	0.523806	0.667161
	99.4985	1.87848	0.984117	1.49607	0.8257	0.293973	0.653611	0.949782	0.47957	0.693928
	100.033	1.90634	0.997031	1.50357	0.830655	0.296055	0.642234	0.898461	0.438047	0.739317
	100.568	1.8526	0.932117	1.50317	0.823428	0.296267	0.640157	0.879943	0.377964	0.751994
	101.103	1.79449	0.91345	1.5116	0.792064	0.331034	0.632196	0.876778	0.336527	0.751005
	101.638	1.79755	0.886817	1.5091	0.730728	0.345442	0.612619	0.879304	0.297994	0.756193
	102.173	1.80801	0.893284	1.51464	0.69167	0.356043	0.614379	0.889185	0.270364	0.750811
	102.708	1.74225	0.893991	1.52224	0.658363	0.368364	0.626005	0.910796	0.272868	0.762018
	103.243	1.70132	0.904873	1.50475	0.644593	0.345885	0.651072	0.979785	0.227811	0.77281
	103.778	1.66756	0.89213	1.47595	0.636457	0.304469	0.67118	0.991069	0.179025	0.78738
	104.313	1.58147	0.876334	1.44658	0.630451	0.302466	0.662222	0.969393	0.201201	0.769754
	104.848	1.47867	0.862482	1.40438	0.61291	0.353743	0.634416	0.885476	0.242599	0.740688
	105.383	1.42199	0.855085	1.37061	0.609593	0.384105	0.656583	0.807957	0.215852	0.729606
	105.918	1.42927	0.850894	1.32285	0.670103	0.428245	0.650361	0.904212	0.211847	0.699362
	106.453	1.42078	0.891369	1.2839	0.69784	0.481051	0.63078	0.964751	0.224438	0.720987
	106.988	1.43713	0.971238	1.31447	0.713502	0.501518	0.686548	1.05529	0.27313	0.723865
	107.523	1.50035	0.975729	1.34622	0.739115	0.466435	0.726277	1.13436	0.296894	0.709302
	108.058	1.5478	0.975385	1.38379	0.763208	0.47576	0.742402	1.18288	0.312584	0.689542
	108.592	1.58123	0.970182	1.38587	0.767523	0.459647	0.746631	1.20354	0.347194	0.685715
	109.127	1.60024	0.969818	1.4306	0.735201	0.470729	0.734447	1.20704	0.346453	0.670062
	109.662	1.5681	0.94718	1.46723	0.677511	0.478636	0.706616	1.24115	0.345328	0.642293
	110.197	1.5297	0.936459	1.43052	0.643926	0.458388	0.682541	1.21855	0.308882	0.615407
	110.732	1.49486	0.987846	1.40096	0.601981	0.419235	0.682939	1.24001	0.280137	0.575058
	111.267	1.4911	1.07459	1.38974	0.587798	0.395909	0.667774	1.16383	0.291329	0.55584
	111.802	1.54294	1.17026	1.35804	0.57832	0.430083	0.610195	1.04764	0.277056	0.54687
	112.337	1.59946	1.21607	1.32313	0.55909	0.41223	0.575718	0.871313	0.277435	0.501498
	112.872	1.65295	1.27692	1.32011	0.550626	0.435703	0.553607	0.72737	0.263092	0.483464
	113.407	1.73871	1.33408	1.30494	0.542143	0.43088	0.528454	0.677864	0.273342	0.454342
	113.942	1.78961	1.3666	1.29263	0.521965	0.387962	0.487714	0.665948	0.253443	0.444508
	114.477	1.72406	1.34455	1.275	0.527848	0.349831	0.497202	0.625359	0.222877	0.445399
	115.012	1.62456	1.33092	1.30837	0.559409	0.348384	0.543335	0.708414	0.203494	0.4977
	115.547	1.52962	1.3274	1.36442	0.603403	0.348606	0.597831	0.811474	0.155947	0.612843
	116.082	1.4508	1.2515	1.39314	0.639284	0.342182	0.605197	0.879006	0.124787	0.650275
	116.617	1.43095	1.22318	1.3935	0.665668	0.329819	0.59467	0.925167	0.105428	0.660814
	117.151	1.39532	1.14571	1.36825	0.678993	0.357182	0.558843	0.954075	0.128534	0.704784
	117.686	1.23773	1.08238	1.34292	0.680472	0.350403	0.529653	1.00108	0.173276	0.795958
	118.221	1.10446	0.99422	1.32859	0.679629	0.338933	0.538633	1.01054	0.222136	0.831744
	118.756	1.01425	0.929028	1.30906	0.68065	0.323729	0.533586	1.0089	0.277304	0.881693
	119.291	0.989713	0.871585	1.26983	0.662739	0.342459	0.540666	0.989824	0.302705	0.952512
	119.826	0.953401	0.835921	1.21206	0.648347	0.389427	0.540492	0.938306	0.293376	0.971571
	120.361	0.971032	0.777618	1.14552	0.639052	0.460391	0.541051	0.91871	0.305027	0.972497
	120.896	1.05545	0.682583	1.07215	0.633407	0.540562	0.50749	0.893935	0.328442	0.875346
	121.431	1.07592	0.591701	1.05785	0.627605	0.605789	0.423117	0.853529	0.347582	0.866441
	121.966	1.05778	0.484871	1.10279	0.587573	0.634366	0.35143	0.825528	0.33863	0.877737
	122.501	1.0455	0.462431	1.17876	0.590912	0.648352	0.329813	0.80722	0.295895	0.847735
	123.036	1.07739	0.482294	1.21933	0.597887	0.635244	0.324822	0.730468	0.273098	0.831505
	123.571	1.08618	0.528641	1.27911	0.612272	0.64271	0.328606	0.74184	0.251895	0.829603
	124.106	1.11432	0.531401	1.29472	0.637058	0.656632	0.331766	0.883534	0.240028	0.839394
	124.641	1.1496	0.556005	1.32017	0.67111	0.623959	0.331897	1.08321	0.221119	0.894404
	125.176	1.20057	0.598945	1.33067	0.677792	0.541888	0.325579	1.04708	0.187869	0.975062
	125.71	1.22579	0.648175	1.32694	0.684828	0.46138	0.315709	1.00952	0.160248	0.972393
	126.245	1.21909	0.666345	1.31188	0.684412	0.39477	0.301648	1.01854	0.120024	0.997928
	126.78	1.0993	0.669206	1.30901	0.725189	0.310173	0.274697	1.00331	0.0797398	0.945491
	127.315	1.00664	0.648005	1.32225	0.786001	0.255604	0.258237	0.978849	0.0614466	0.904999
	127.85	0.973448	0.661378	1.30899	0.84256	0.175887	0.258227	0.942484	0.0404971	0.888373
	128.385	0.96843	0.685214	1.27518	0.891003	0.136365	0.258073	0.891188	0.0101104	0.873482
	128.92	0.979023	0.664348	1.26848	0.931297	0.0669769	0.270001	0.814471	-0.00578529	0.794117
	129.455	0.944944	0.645261	1.24495	0.954576	0.0387743	0.273726	0.751448	-0.00447917	0.72484
	129.99	0.954319	0.603966	1.22799	0.953467	0.0610142	0.273252	0.722025	-0.0147516	0.657595
	130.525	0.96964	0.549707	1.16927	0.951558	0.122253	0.284786	0.66463	-0.0203824	0.5696
	131.06	1.00255	0.494562	1.16949	0.919796	0.16573	0.28644	0.631285	-0.000557671	0.540437
	131.595	1.03254	0.429749	1.16985	0.876552	0.22608	0.294524	0.55033	0.0212961	0.537729
	132.13	1.06437	0.379074	1.17043	0.833427	0.242457	0.312461	0.471254	0.050693	0.565544
	132.665	1.10236	0.332612	1.1625	0.788495	0.236245	0.32935	0.38015	0.0342544	0.607232
	133.2	1.09026	0.292407	1.19843	0.716205	0.283492	0.328173	0.421284	0.0505991	0.63803
	133.735	1.05099	0.261645	1.21447	0.632053	0.279253	0.318519	0.46121	0.0571094	0.627723
	134.269	1.01591	0.247769	1.21964	0.54766	0.252052	0.311818	0.493228	0.0226723	0.603517
	134.804	0.95928	0.230687	1.23574	0.519352	0.227238	0.309123	0.495897	-0.00112561	0.578209
	135.339	0.93636	0.224895	1.22674	0.504575	0.240746	0.314208	0.481623	-0.00936957	0.563385
	135.874	0.952571	0.238337	1.23195	0.524778	0.263978	0.336307	0.50878	0.00113668	0.529834
	136.409	0.98291	0.252267	1.21958	0.552072	0.252726	0.354918	0.512841	-0.00157013	0.51616
	136.944	1.00571	0.263367	1.19784	0.589229	0.253906	0.362626	0.501485	0.0203933	0.536679
	137.479	1.03663	0.268372	1.11757	0.625775	0.296196	0.360971	0.481538	0.0204953	0.608053
	138.014	1.03728	0.271533	1.04209	0.682728	0.320074	0.364467	0.497382	0.0202159	0.631357
	138.549	0.994791	0.263039	0.99242	0.735422	0.31663	0.349739	0.519308	0.0203745	0.604192
	139.084	0.95694	0.261473	0.958758	0.776877	0.319261	0.329577	0.556452	0.0287832	0.589315
	139.619	0.894479	0.255818	0.965013	0.80598	0.343877	0.319451	0.562963	0.0321049	0.582814
	140.154	0.863909	0.234843	0.970089	0.828811	0.36527	0.319286	0.570876	0.0100641	0.585914
	140.689	0.84725	0.249156	0.982637	0.843261	0.379978	0.320184	0.683657	0.00670418	0.628598
	141.224	0.841746	0.311099	1.0036	0.843252	0.416987	0.326392	0.719056	0.00142802	0.657546
	141.759	0.839596	0.366524	0.983288	0.82912	0.480828	0.325151	0.716589	-0.00832373	0.669023
	142.294	0.83811	0.395249	0.98144	0.825188	0.514072	0.309733	0.724857	0.00439319	0.657875
	142.828	0.798079	0.425751	0.980291	0.81903	0.544739	0.294041	0.72358	0.00921289	0.655479
	143.363	0.732679	0.445794	1.00071	0.770855	0.559734	0.283694	0.714532	-0.0134305	0.585918
	143.898	0.6922	0.459043	1.0396	0.697881	0.575711	0.271613	0.694413	-0.0295727	0.524984
	144.433	0.675384	0.457845	1.08954	0.611738	0.538365	0.247947	0.664856	-0.050205	0.472234
	144.968	0.647169	0.448166	1.13293	0.504939	0.494519	0.21642	0.605879	-0.094585	0.483265
	145.503	0.593113	0.424196	1.17371	0.373953	0.446501	0.185316	0.579438	-0.11749	0.516797
	146.038	0.55879	0.416654	1.20404	0.313237	0.419626	0.181071	0.569846	-0.0985173	0.569968
	146.573	0.538496	0.400873	1.21427	0.290114	0.46326	0.185875	0.565396	-0.0747043	0.601671
	147.108	0.530011	0.389379	1.24117	0.287264	0.508526	0.199819	0.570228	-0.0378153	0.600698
	147.643	0.493368	0.347974	1.25781	0.303011	0.489418	0.219874	0.552974	0.00455695	0.605735
	148.178	0.483215	0.330143	1.28308	0.315612	0.443214	0.231545	0.490293	0.023033	0.582747
	148.713	0.517209	0.321959	1.27035	0.339882	0.423317	0.221479	0.448033	0.0367461	0.566269
	149.248	0.525257	0.291893	1.2296	0.350209	0.375991	0.211377	0.433525	0.045487	0.550956
	149.783	0.536608	0.272621	1.19078	0.350969	0.318952	0.211839	0.416153	0.0493831	0.545938
	150.318	0.54122	0.255946	1.18022	0.373317	0.263445	0.211785	0.406536	0.0521833	0.538986
	150.853	0.546342	0.227654	1.20728	0.409319	0.209504	0.211958	0.380398	0.0369586	0.513251
	151.387	0.537239	0.20123	1.23953	0.444577	0.165312	0.218312	0.334535	0.0357172	0.475007
	151.922	0.571331	0.185109	1.25847	0.4756	0.0789145	0.21697	0.321086	0.0244143	0.442802
	152.457	0.6202	0.184756	1.26239	0.505028	0.0295266	0.233473	0.332446	0.023818	0.430642
	152.992	0.644446	0.18735	1.25745	0.520849	0.030465	0.243172	0.333413	0.0127676	0.454217
	153.527	0.652861	0.18817	1.24258	0.53864	0.0184517	0.22762	0.348124	-0.00811525	0.481263
	154.062	0.640701	0.202158	1.19733	0.552688	0.0429305	0.184078	0.372935	-0.0323893	0.492474
	154.597	0.644214	0.238441	1.13812	0.545627	0.0677371	0.157925	0.402196	-0.0501646	0.537015
	155.132	0.620511	0.266641	1.05124	0.507927	0.108202	0.152359	0.42207	-0.0353604	0.590179
	155.667	0.605542	0.291334	0.988797	0.468994	0.129574	0.157095	0.436978	-0.0227695	0.605804
	156.202	0.632192	0.30999	0.999821	0.422289	0.127093	0.16442	0.446969	0.000411347	0.60918
	156.737	0.64784	0.332642	1.04005	0.364597	0.131846	0.173896	0.436458	0.029121	0.624279
	157.272	0.669661	0.307688	1.02515	0.30832	0.171052	0.18642	0.456356	0.0510852	0.593261
	157.807	0.625946	0.300928	1.02555	0.275083	0.261075	0.194501	0.470453	0.0341486	0.567067
	158.342	0.684214	0.298431	1.06023	0.237865	0.333751	0.202079	0.435671	0.0197569	0.520052
	158.877	0.724744	0.293816	1.09564	0.20738	0.38381	0.201672	0.417153	0.0307942	0.489613
	159.412	0.751948	0.269787	1.10429	0.214469	0.420675	0.190323	0.407551	0.0246458	0.47173
	159.947	0.756011	0.256672	1.08663	0.225945	0.428887	0.193695	0.372514	0.0246136	0.437252
	160.481	0.747679	0.240224	1.08966	0.238076	0.412191	0.225374	0.348944	-0.00501916	0.392327
	161.016	0.758348	0.196441	1.14648	0.254646	0.354902	0.269894	0.369928	-0.0254104	0.391826
	161.551	0.768812	0.146663	1.20763	0.273493	0.282033	0.305114	0.475077	-0.0177594	0.422757
	162.086	0.713037	0.090897	1.24127	0.288731	0.205015	0.345145	0.616221	-0.0145852	0.472246
	162.621	0.680635	0.0849974	1.2686	0.30769	0.216585	0.376552	0.648102	-0.0297766	0.497944
	163.156	0.675122	0.107838	1.28405	0.322411	0.267429	0.370506	0.704648	-0.0590914	0.517451
	163.691	0.673374	0.146112	1.27377	0.326087	0.296384	0.353672	0.698277	-0.0973058	0.493825
	164.226	0.687035	0.164037	1.25021	0.302131	0.27396	0.346762	0.741712	-0.1265	0.444171
	164.761	0.661055	0.194771	1.20933	0.29041	0.223681	0.337567	0.725497	-0.150728	0.406457
	165.296	0.611961	0.200064	1.18496	0.25532	0.167936	0.334481	0.688065	-0.175539	0.39379
	165.831	0.545992	0.189186	1.1574	0.209273	0.0500793	0.328554	0.699971	-0.191553	0.371816
	166.366	0.467923	0.183749	1.08079	0.18878	0.00719294	0.339484	0.712026	-0.187841	0.344389
	166.901	0.413066	0.180131	1.03431	0.18746	0.0523451	0.333514	0.693209	-0.170549	0.331583
	167.436	0.366222	0.166349	1.04592	0.166046	0.0409622	0.321117	0.623582	-0.153066	0.340405
	167.971	0.312469	0.151009	1.03933	0.135399	0.0759066	0.307399	0.561067	-0.141162	0.318206
	168.506	0.267954	0.161454	1.0504	0.104779	0.129473	0.309551	0.490225	-0.111632	0.303091
	169.04	0.244525	0.156352	1.05905	0.0891733	0.153828	0.348569	0.447483	-0.0832477	0.271684
	169.575	0.235149	0.135	1.01916	0.0644089	0.164235	0.39779	0.419	-0.0683232	0.283555
	170.11	0.227724	0.13056	0.949963	0.0518776	0.17046	0.45367	0.380257	-0.0568268	0.315872
	170.645	0.219371	0.151946	0.919375	0.0380629	0.160951	0.487911	0.349358	-0.0603928	0.336979
	171.18	0.210046	0.160034	0.913374	0.0323957	0.142821	0.503843	0.328027	-0.0701536	0.354168
	171.715	0.206021	0.157264	0.914344	0.0605016	0.137923	0.488395	0.318784	-0.0867742	0.391513
	172.25	0.173973	0.151937	0.887484	0.11761	0.157758	0.463622	0.311874	-0.109046	0.411987
	172.785	0.149299	0.151534	0.877674	0.176741	0.157882	0.438508	0.306751	-0.136957	0.419573
	173.32	0.15921	0.144501	0.860467	0.223935	0.134741	0.41754	0.31671	-0.150269	0.418304
	173.855	0.174933	0.124346	0.895149	0.256648	0.139072	0.389742	0.299929	-0.13591	0.420935
	174.39	0.193372	0.110007	0.916482	0.287334	0.144319	0.341572	0.260745	-0.121969	0.380778
	174.925	0.196818	0.106454	0.930756	0.330629	0.127673	0.297246	0.238905	-0.108234	0.357237
	175.46	0.169519	0.105091	0.92824	0.35357	0.12192	0.265812	0.202718	-0.103728	0.3473
	175.995	0.142088	0.0984392	0.919814	0.357176	0.100337	0.235376	0.197892	-0.105676	0.355823
	176.53	0.154772	0.0847686	0.898512	0.360365	0.109507	0.192497	0.186724	-0.111604	0.378204
	177.065	0.157811	0.0688065	0.886577	0.360307	0.182496	0.168463	0.156906	-0.115691	0.420937
	177.599	0.154949	0.0521132	0.881022	0.340384	0.248793	0.169156	0.0981996	-0.126806	0.460736
	178.134	0.143225	0.0472468	0.853773	0.320531	0.266927	0.191451	0.0681547	-0.135106	0.512864
	178.669	0.15032	0.0301284	0.83729	0.298613	0.243076	0.200705	0.058308	-0.094761	0.558326
	179.204	0.152106	0.0104302	0.850062	0.275541	0.222736	0.207472	0.0653445	-0.0504861	0.587092
	179.739	0.155843	0.0105488	0.874159	0.242596	0.211268	0.197215	0.0652721	-0.036371	0.607814
	180.274	0.164972	0.0218635	0.889075	0.20903	0.200452	0.192532	0.0762439	-0.0330338	0.581062
	180.809	0.180553	0.0453401	0.909857	0.169077	0.201763	0.199398	0.0975696	-0.0251077	0.554403
	181.344	0.210565	0.0722354	0.997923	0.151124	0.225295	0.196664	0.115401	-0.026372	0.505366
	181.879	0.228077	0.0927975	1.06788	0.134895	0.2138	0.184393	0.13453	-0.0412825	0.453477
	182.414	0.234608	0.106518	1.12328	0.129316	0.205861	0.159657	0.15788	-0.0476524	0.420398
	182.949	0.237109	0.115349	1.15674	0.12708	0.216403	0.136311	0.171169	-0.0647849	0.396679
	183.484	0.247254	0.129335	1.18715	0.125052	0.263479	0.121989	0.18534	-0.0988881	0.387517
	184.019	0.275595	0.139565	1.19841	0.127613	0.26844	0.104859	0.186968	-0.129741	0.368896
	184.554	0.281915	0.133603	1.19602	0.135751	0.226319	0.0875878	0.181416	-0.142116	0.30007
	185.089	0.288033	0.141303	1.17268	0.145237	0.255402	0.0731623	0.193011	-0.129608	0.221976
	185.624	0.297624	0.159987	1.13979	0.158309	0.293888	0.0695155	0.183515	-0.104008	0.189193
	186.158	0.320603	0.179444	1.07706	0.157836	0.344564	0.0693851	0.177572	-0.0761997	0.186795
	186.693	0.33554	0.179945	1.02408	0.161292	0.38449	0.082096	0.188806	-0.0572666	0.184801
	187.228	0.342146	0.18576	0.947587	0.162267	0.406354	0.107493	0.206166	-0.0462612	0.17876
	187.763	0.339982	0.177711	0.851664	0.161254	0.423751	0.124552	0.21519	-0.0752624	0.189643
	188.298	0.319116	0.178508	0.835079	0.157637	0.459612	0.114402	0.218628	-0.0995468	0.170129
	188.833	0.31488	0.176555	0.833978	0.158938	0.466158	0.104059	0.22279	-0.107358	0.148125
	189.368	0.324059	0.172384	0.841426	0.160205	0.446543	0.115399	0.228016	-0.102493	0.107436
	189.903	0.352666	0.164385	0.821025	0.166238	0.419522	0.134217	0.217721	-0.108678	0.115254
	190.438	0.362038	0.159596	0.819463	0.163702	0.399552	0.151157	0.23989	-0.119144	0.154517
	190.973	0.33119	0.148635	0.791086	0.173865	0.380968	0.158458	0.21682	-0.122035	0.170803
	191.508	0.299916	0.121167	0.738475	0.172672	0.372563	0.152083	0.20183	-0.123785	0.188125
	192.043	0.297185	0.101547	0.698155	0.16011	0.374658	0.129575	0.195381	-0.135336	0.203397
	192.578	0.296593	0.0930589	0.704749	0.147536	0.318278	0.114817	0.199233	-0.143233	0.235899
	193.113	0.262835	0.0803131	0.712402	0.13717	0.287712	0.116529	0.194917	-0.133356	0.252766
	193.648	0.245529	0.0689036	0.740215	0.135823	0.278922	0.11487	0.191298	-0.127554	0.259393
	194.183	0.22769	0.0626302	0.785796	0.136759	0.278528	0.115635	0.188932	-0.132664	0.253539
	194.717	0.206678	0.0460764	0.865873	0.12855	0.267273	0.132764	0.169885	-0.143651	0.252143
	195.252	0.199253	0.0302784	0.936888	0.129929	0.300682	0.153673	0.150866	-0.161797	0.21789
	195.787	0.208083	0.0329463	0.986471	0.138667	0.317004	0.171305	0.140958	-0.176352	0.18536
	196.322	0.228018	0.0374936	1.02527	0.138667	0.327441	0.185739	0.153645	-0.188584	0.163714
	196.857	0.247218	0.0464618	1.053	0.135133	0.319876	0.194279	0.153076	-0.197142	0.145483
	197.392	0.247484	0.0715102	1.08915	0.1277	0.319742	0.187249	0.148657	-0.202977	0.128751
	197.927	0.247846	0.103907	1.08895	0.122013	0.310431	0.176721	0.147915	-0.207007	0.136396
	198.462	0.262791	0.120269	1.08377	0.120424	0.332141	0.175151	0.162318	-0.202858	0.130081
	198.997	0.274602	0.132995	1.04412	0.121102	0.366194	0.180979	0.188103	-0.190333	0.12933
	199.532	0.293302	0.140394	1.04107	0.120829	0.41548	0.192823	0.207117	-0.172863	0.129191
	200.067	0.329032	0.143028	1.02263	0.126716	0.433827	0.205434	0.201855	-0.152951	0.127796

## Sheet: acvr1ba+1bb MO+1bb mRNA lateral
	Figure 4 - figure supplement 1
	acvr1b-a-/- + acvr1b-b MO + acvr1b-b mRNA, lateral view
		Background-subtracted and normalized intensity in acvr1b-a-/- + acvr1b-b MO + acvr1b-b mRNA embryos, lateral view
	Distance (µm)	Embryo
		1	2	3	4	5	6	7	8	9	10
	0	1.21384	0.753819	1.34601	1.3328	1.91775	1.2318	1.34292	0.857209	1.19268	1.05337
	0.534938	1.20412	0.738475	1.37571	1.34737	1.88584	1.19662	1.34492	0.886114	1.16284	1.04289
	1.06988	1.18615	0.722317	1.36376	1.35488	1.87091	1.18518	1.36021	0.908342	1.13724	1.02053
	1.60481	1.18333	0.715029	1.34372	1.38467	1.81378	1.20505	1.36584	0.920954	1.13447	0.997749
	2.13975	1.19349	0.714141	1.34174	1.38672	1.77138	1.18751	1.37183	0.925554	1.15523	0.989801
	2.67469	1.1953	0.706634	1.35198	1.3857	1.6945	1.16019	1.35782	0.91673	1.1858	0.995862
	3.20963	1.18834	0.685846	1.34241	1.34179	1.6523	1.15275	1.35486	0.89873	1.20628	0.997513
	3.74457	1.19009	0.66262	1.26824	1.28955	1.60463	1.17122	1.36379	0.874925	1.22007	0.982242
	4.27951	1.19244	0.646125	1.21777	1.22328	1.55564	1.24045	1.38022	0.855816	1.2258	0.976551
	4.81444	1.18783	0.634676	1.19509	1.21255	1.53092	1.25869	1.36483	0.853193	1.23607	1.00355
	5.34938	1.17367	0.626876	1.19471	1.18443	1.52065	1.24677	1.34714	0.859056	1.23407	1.04024
	5.88432	1.16012	0.606824	1.15053	1.14775	1.54044	1.24753	1.34194	0.879868	1.22246	1.08256
	6.41926	1.15386	0.591689	1.11164	1.14306	1.57218	1.28833	1.31657	0.904203	1.21488	1.11686
	6.9542	1.15668	0.577795	1.09696	1.15205	1.55805	1.34355	1.29385	0.923556	1.21501	1.13715
	7.48913	1.1667	0.565467	1.05097	1.16159	1.54715	1.36593	1.28422	0.93497	1.21529	1.14247
	8.02407	1.18692	0.549213	0.982996	1.15998	1.53187	1.41778	1.25402	0.933781	1.20836	1.14539
	8.55901	1.2121	0.542247	0.915409	1.18345	1.52591	1.5013	1.24028	0.916676	1.1977	1.12417
	9.09395	1.23805	0.54535	0.854068	1.17736	1.49673	1.56278	1.24661	0.907091	1.1915	1.08094
	9.62889	1.24332	0.550321	0.737192	1.17674	1.47429	1.59322	1.21867	0.907501	1.18865	1.03074
	10.1638	1.22506	0.55558	0.68574	1.15782	1.42981	1.58738	1.18761	0.901981	1.19307	0.995966
	10.6988	1.21517	0.55843	0.660424	1.09579	1.43066	1.63938	1.15943	0.888004	1.19893	0.97325
	11.2337	1.22334	0.55916	0.656428	1.05506	1.41977	1.73047	1.13615	0.881989	1.21534	0.955165
	11.7686	1.24109	0.555695	0.678636	1.03563	1.41969	1.79601	1.14098	0.869764	1.21824	0.955648
	12.3036	1.25904	0.554704	0.716241	1.01387	1.42208	1.81112	1.14475	0.852429	1.19902	0.969136
	12.8385	1.28132	0.548888	0.738292	1.01648	1.42497	1.796	1.14475	0.824557	1.1768	0.968839
	13.3735	1.30123	0.537099	0.715043	1.03061	1.43714	1.79747	1.1219	0.777385	1.14706	0.956719
	13.9084	1.32311	0.53712	0.710477	1.02138	1.44729	1.783	1.10974	0.74288	1.10213	0.938035
	14.4433	1.3338	0.533743	0.715783	0.978445	1.42416	1.77905	1.1104	0.734723	1.05945	0.914626
	14.9783	1.33472	0.533109	0.711437	0.963196	1.42111	1.7985	1.12199	0.739483	1.02258	0.912848
	15.5132	1.33207	0.54027	0.725971	0.958535	1.42203	1.80607	1.1539	0.750233	0.994477	0.922669
	16.0481	1.32169	0.545955	0.738693	0.970288	1.4223	1.79842	1.19163	0.764272	0.965054	0.936333
	16.5831	1.30113	0.547254	0.740669	0.997762	1.40911	1.79945	1.18667	0.783019	0.943561	0.953211
	17.118	1.27365	0.532686	0.724066	1.01892	1.39283	1.81421	1.18472	0.795593	0.936315	0.965599
	17.653	1.25578	0.524492	0.709451	1.04592	1.41331	1.81922	1.18971	0.804002	0.941917	0.980921
	18.1879	1.24182	0.511961	0.706482	1.08043	1.44011	1.80898	1.17535	0.803585	0.952339	1.00924
	18.7228	1.21509	0.499512	0.700984	1.08504	1.47044	1.79644	1.17734	0.803524	0.967653	1.03553
	19.2578	1.1938	0.489296	0.699445	1.10384	1.47834	1.75083	1.1867	0.794344	0.977986	1.03667
	19.7927	1.1937	0.484979	0.710418	1.11195	1.47373	1.76413	1.19871	0.775542	0.985467	1.03189
	20.3276	1.19587	0.491332	0.710766	1.11663	1.47159	1.79071	1.19853	0.761667	0.987007	1.03297
	20.8626	1.20522	0.49786	0.72749	1.10121	1.47274	1.81094	1.18257	0.747749	0.981454	1.02589
	21.3975	1.20922	0.505286	0.746956	1.06106	1.45908	1.77833	1.1422	0.740514	0.978344	0.990591
	21.9325	1.22209	0.519315	0.738159	1.02341	1.44804	1.75818	1.11985	0.722843	0.982937	0.943808
	22.4674	1.23989	0.537414	0.730011	0.982704	1.44632	1.7242	1.11383	0.701705	0.977724	0.88322
	23.0023	1.24676	0.552083	0.72668	0.94124	1.4312	1.7012	1.11238	0.695413	0.972002	0.838053
	23.5373	1.24492	0.557378	0.720567	0.899701	1.39546	1.6526	1.10425	0.688366	0.968081	0.804386
	24.0722	1.2398	0.55284	0.716468	0.867515	1.35715	1.62841	1.07794	0.684728	0.951801	0.790377
	24.6072	1.23533	0.548491	0.724427	0.832798	1.33297	1.60663	1.06789	0.682091	0.938786	0.785967
	25.1421	1.24837	0.548671	0.725962	0.816212	1.32753	1.57156	1.03853	0.679838	0.926823	0.770341
	25.677	1.26691	0.546025	0.716093	0.827578	1.31987	1.56867	1.01445	0.673284	0.914606	0.744964
	26.212	1.27976	0.542969	0.69736	0.845032	1.29917	1.56294	0.979354	0.675346	0.90389	0.716964
	26.7469	1.27024	0.538795	0.686954	0.83289	1.27746	1.53303	0.938657	0.675946	0.897285	0.674818
	27.2818	1.25068	0.532716	0.692823	0.838324	1.27249	1.52936	0.900074	0.682513	0.881345	0.640913
	27.8168	1.22624	0.529714	0.701787	0.833774	1.28097	1.52387	0.876839	0.690844	0.867887	0.623399
	28.3517	1.19799	0.530314	0.702938	0.837312	1.29643	1.50858	0.856797	0.696077	0.844922	0.61197
	28.8867	1.17958	0.526299	0.712028	0.829141	1.27249	1.50274	0.840547	0.699166	0.819625	0.603865
	29.4216	1.17028	0.519529	0.708846	0.816224	1.24352	1.51694	0.813997	0.684508	0.788999	0.599951
	29.9565	1.15582	0.510533	0.704765	0.812236	1.2293	1.52302	0.817742	0.663842	0.750362	0.604818
	30.4915	1.13648	0.488412	0.716162	0.826362	1.21729	1.49104	0.826961	0.649933	0.717385	0.612717
	31.0264	1.10716	0.459797	0.722952	0.830255	1.19356	1.4673	0.805731	0.642725	0.698531	0.638365
	31.5614	1.0802	0.429334	0.714069	0.813123	1.16512	1.45541	0.788464	0.632755	0.685009	0.667132
	32.0963	1.05383	0.418187	0.688494	0.793797	1.14237	1.45411	0.747505	0.620991	0.667701	0.692481
	32.6312	1.04175	0.425106	0.658612	0.793522	1.12254	1.45708	0.72385	0.596596	0.655052	0.725084
	33.1662	1.0206	0.425906	0.66009	0.794234	1.1012	1.45238	0.709029	0.571272	0.635021	0.738714
	33.7011	1.00151	0.415148	0.659025	0.797884	1.06312	1.48405	0.702003	0.554972	0.617438	0.74591
	34.236	0.997693	0.402996	0.671046	0.805821	1.03429	1.47613	0.702791	0.537376	0.605125	0.765823
	34.771	0.995413	0.398693	0.649975	0.802975	1.01678	1.47866	0.705781	0.516343	0.606032	0.782113
	35.3059	0.996021	0.393539	0.620671	0.803575	1.01415	1.43946	0.712012	0.504808	0.602146	0.782872
	35.8409	1.00082	0.393145	0.578174	0.789114	1.02379	1.42277	0.723439	0.50372	0.603011	0.766334
	36.3758	1.01483	0.389661	0.563319	0.77769	1.02266	1.42906	0.729517	0.504916	0.607845	0.754862
	36.9107	1.01514	0.384844	0.545556	0.768115	1.0242	1.43698	0.722989	0.510205	0.608155	0.741403
	37.4457	1.00593	0.388336	0.524985	0.763967	1.0098	1.46825	0.700871	0.506692	0.609775	0.727486
	37.9806	0.977918	0.396524	0.511274	0.749972	0.991531	1.48656	0.695277	0.499421	0.612734	0.698751
	38.5155	0.953062	0.404942	0.501602	0.759774	0.963228	1.49915	0.699126	0.495268	0.617455	0.668948
	39.0505	0.94174	0.411675	0.490209	0.776722	0.931317	1.48372	0.709769	0.492521	0.628298	0.644233
	39.5854	0.925959	0.418994	0.487568	0.781997	0.892569	1.43973	0.706396	0.482397	0.645606	0.610749
	40.1204	0.89675	0.415442	0.490339	0.807083	0.875523	1.42853	0.712932	0.469385	0.652687	0.580712
	40.6553	0.870252	0.404881	0.493217	0.829799	0.865918	1.44899	0.718741	0.452532	0.673234	0.560956
	41.1902	0.84147	0.394999	0.496945	0.834072	0.856168	1.44874	0.706004	0.442219	0.688369	0.55297
	41.7252	0.814853	0.392039	0.499825	0.827268	0.840425	1.46372	0.684965	0.434986	0.692866	0.545344
	42.2601	0.797405	0.385668	0.500032	0.81483	0.837055	1.48102	0.673394	0.437254	0.692725	0.533429
	42.7951	0.793545	0.38057	0.496207	0.826942	0.838009	1.49274	0.659945	0.442628	0.689253	0.528304
	43.33	0.783123	0.382272	0.489088	0.825173	0.848471	1.5239	0.660276	0.454022	0.674042	0.526711
	43.8649	0.752876	0.387336	0.483884	0.808556	0.859451	1.53743	0.674333	0.463309	0.649835	0.513621
	44.3999	0.719512	0.391843	0.480758	0.774486	0.863957	1.50808	0.694226	0.462193	0.622026	0.502708
	44.9348	0.693328	0.390657	0.460744	0.710872	0.863593	1.49044	0.720395	0.457273	0.595922	0.493136
	45.4697	0.67393	0.388333	0.445571	0.669863	0.865992	1.43552	0.731253	0.445551	0.591008	0.483122
	46.0047	0.649841	0.393939	0.442718	0.632083	0.863888	1.38494	0.731529	0.435207	0.586943	0.482393
	46.5396	0.646111	0.394602	0.429142	0.623675	0.869183	1.35823	0.724163	0.429543	0.578683	0.476976
	47.0746	0.656746	0.38697	0.426053	0.621603	0.87442	1.31818	0.716787	0.433189	0.570347	0.46483
	47.6095	0.667006	0.375726	0.414594	0.638552	0.885619	1.30799	0.714286	0.433483	0.567511	0.454918
	48.1444	0.664705	0.361089	0.401126	0.650874	0.886948	1.29422	0.709771	0.435733	0.572026	0.445507
	48.6794	0.645022	0.350187	0.387546	0.650833	0.889453	1.31585	0.70528	0.442332	0.581693	0.435707
	49.2143	0.630216	0.33823	0.386784	0.644577	0.885155	1.30158	0.695164	0.447476	0.584806	0.425631
	49.7492	0.624793	0.324221	0.396027	0.623035	0.872827	1.28674	0.694653	0.451791	0.578169	0.418167
	50.2842	0.62742	0.318247	0.398937	0.599349	0.860793	1.27421	0.698693	0.457799	0.556445	0.411295
	50.8191	0.631654	0.313124	0.394084	0.585934	0.863591	1.26429	0.71517	0.458786	0.54326	0.419486
	51.3541	0.623711	0.30261	0.39847	0.579691	0.864026	1.24912	0.726228	0.461862	0.537089	0.419797
	51.889	0.629178	0.295387	0.399134	0.579813	0.880716	1.28042	0.731598	0.465052	0.532951	0.410852
	52.4239	0.639473	0.294188	0.389054	0.573366	0.895155	1.30128	0.726294	0.456673	0.518381	0.407616
	52.9589	0.646369	0.29877	0.380129	0.545556	0.902977	1.32454	0.726505	0.446048	0.497433	0.402338
	53.4938	0.648827	0.303508	0.375221	0.522945	0.921111	1.34904	0.719796	0.436361	0.477235	0.399913
	54.0288	0.642482	0.304677	0.385362	0.495598	0.920182	1.35383	0.702139	0.418051	0.463824	0.39931
	54.5637	0.627126	0.306014	0.399925	0.479896	0.917326	1.3545	0.6772	0.408498	0.450305	0.396196
	55.0986	0.621774	0.304892	0.421202	0.46535	0.915015	1.34963	0.652963	0.405513	0.437803	0.390241
	55.6336	0.632281	0.299042	0.428579	0.450381	0.90378	1.33675	0.639567	0.407241	0.434407	0.380143
	56.1685	0.637784	0.294568	0.422199	0.433253	0.86925	1.3196	0.631016	0.402222	0.432346	0.366931
	56.7034	0.644767	0.297734	0.407667	0.433099	0.837239	1.27838	0.619273	0.385749	0.434791	0.359951
	57.2384	0.637416	0.298393	0.400096	0.429858	0.798048	1.2361	0.608307	0.368817	0.440901	0.353491
	57.7733	0.631589	0.294991	0.421343	0.423941	0.773716	1.20141	0.593697	0.36158	0.444036	0.350704
	58.3083	0.621974	0.288238	0.449082	0.411823	0.761186	1.2135	0.572726	0.351365	0.449248	0.351239
	58.8432	0.592298	0.280772	0.439867	0.418145	0.766707	1.20893	0.547586	0.333798	0.453531	0.350677
	59.3781	0.554501	0.272089	0.432175	0.425309	0.772826	1.2163	0.505884	0.323249	0.453179	0.358015
	59.9131	0.535963	0.260932	0.424072	0.440717	0.758466	1.21797	0.476399	0.315339	0.452125	0.363648
	60.448	0.528854	0.249772	0.410082	0.449502	0.722668	1.22718	0.455461	0.305274	0.453897	0.370739
	60.9829	0.524746	0.241696	0.402831	0.444185	0.667317	1.25557	0.447163	0.284629	0.461633	0.375431
	61.5179	0.516561	0.235079	0.396667	0.442065	0.603712	1.27178	0.444099	0.265643	0.468479	0.378555
	62.0528	0.506886	0.228753	0.388977	0.446204	0.555955	1.27397	0.450004	0.255848	0.469312	0.386509
	62.5878	0.495864	0.223898	0.374005	0.452268	0.527103	1.26306	0.455019	0.252014	0.466076	0.382149
	63.1227	0.484529	0.217164	0.364497	0.458722	0.510404	1.2275	0.452463	0.250416	0.456834	0.378049
	63.6576	0.480315	0.207686	0.361715	0.46663	0.502117	1.18298	0.450886	0.255286	0.443716	0.381524
	64.1926	0.475888	0.204372	0.363361	0.466785	0.502851	1.14857	0.451632	0.257589	0.421753	0.385015
	64.7275	0.473616	0.194431	0.355166	0.460712	0.508653	1.11979	0.448163	0.25582	0.409467	0.380028
	65.2625	0.46655	0.18396	0.347203	0.444606	0.521436	1.1012	0.434521	0.252319	0.4071	0.364588
	65.7974	0.46109	0.175107	0.333584	0.428197	0.543651	1.1135	0.423469	0.247243	0.40682	0.360597
	66.3323	0.458418	0.166645	0.32339	0.405109	0.557477	1.11383	0.404398	0.237037	0.402466	0.363639
	66.8673	0.455523	0.161442	0.313346	0.38227	0.581186	1.0878	0.38628	0.225679	0.395495	0.361528
	67.4022	0.446398	0.155054	0.307629	0.362642	0.605986	1.06602	0.371148	0.218844	0.384572	0.352259
	67.9371	0.442787	0.147419	0.304944	0.33842	0.620265	1.06497	0.367682	0.218189	0.37584	0.342042
	68.4721	0.440566	0.14398	0.303065	0.326035	0.6263	1.06453	0.369234	0.218895	0.369186	0.320708
	69.007	0.439108	0.14301	0.295408	0.327006	0.617155	1.06608	0.366352	0.220513	0.369519	0.293637
	69.542	0.432838	0.151705	0.291702	0.318785	0.613842	1.06525	0.372345	0.217893	0.377461	0.270291
	70.0769	0.425137	0.153462	0.26696	0.328997	0.592265	1.05145	0.384062	0.219355	0.381377	0.25399
	70.6118	0.424498	0.156183	0.252834	0.329711	0.553854	1.03887	0.400536	0.231624	0.377535	0.242265
	71.1468	0.419927	0.159586	0.252794	0.326929	0.523923	1.01768	0.407972	0.247873	0.380264	0.239668
	71.6817	0.419811	0.162042	0.242756	0.313182	0.501029	1.01342	0.40925	0.247887	0.382716	0.241405
	72.2167	0.434229	0.160464	0.234879	0.298353	0.486922	1.01126	0.406854	0.242633	0.377166	0.239301
	72.7516	0.43954	0.157821	0.235752	0.293887	0.459239	0.982881	0.406427	0.242344	0.372906	0.233462
	73.2865	0.427775	0.159856	0.234347	0.291157	0.447206	0.957954	0.409409	0.240601	0.367457	0.223053
	73.8215	0.421354	0.162951	0.237707	0.287883	0.443287	0.924278	0.423697	0.237533	0.361231	0.216166
	74.3564	0.420907	0.163794	0.253716	0.283367	0.429466	0.893883	0.441073	0.237786	0.348668	0.216852
	74.8913	0.414328	0.158291	0.263022	0.288306	0.419961	0.879804	0.443842	0.234779	0.344103	0.215362
	75.4263	0.404373	0.156579	0.275383	0.293777	0.410738	0.902451	0.444376	0.235505	0.340154	0.225641
	75.9612	0.395039	0.156445	0.290671	0.29206	0.396508	0.917641	0.447117	0.239207	0.331206	0.23538
	76.4962	0.38797	0.15628	0.295196	0.298428	0.382227	0.956638	0.453143	0.238973	0.319001	0.233139
	77.0311	0.380553	0.154684	0.302579	0.313956	0.372006	0.964566	0.463546	0.237229	0.304882	0.220332
	77.566	0.375347	0.152758	0.315411	0.326102	0.363703	0.974764	0.461859	0.233562	0.288723	0.209182
	78.101	0.377001	0.150526	0.324525	0.327447	0.356682	0.974911	0.455316	0.232832	0.282276	0.202413
	78.6359	0.378456	0.154669	0.321246	0.317556	0.345257	0.957373	0.44922	0.230862	0.286861	0.203692
	79.1708	0.373244	0.161418	0.312987	0.312634	0.332911	0.961924	0.446685	0.227358	0.288131	0.200566
	79.7058	0.362904	0.165536	0.316551	0.297209	0.318814	0.965041	0.44483	0.228024	0.284267	0.189089
	80.2407	0.348931	0.164392	0.314313	0.286338	0.307716	0.95289	0.443874	0.226101	0.279293	0.179501
	80.7757	0.333072	0.15364	0.308462	0.265704	0.303274	0.941222	0.436114	0.225442	0.273292	0.182053
	81.3106	0.315329	0.144332	0.306843	0.260239	0.30147	0.932234	0.422635	0.229265	0.273437	0.189858
	81.8455	0.309385	0.138576	0.310486	0.26865	0.297803	0.941009	0.415506	0.23772	0.271208	0.191259
	82.3805	0.30729	0.130449	0.315614	0.280717	0.294624	0.931632	0.416418	0.243696	0.268107	0.195107
	82.9154	0.299988	0.121534	0.315579	0.288415	0.28704	0.913234	0.414134	0.238995	0.259921	0.201002
	83.4504	0.295134	0.112428	0.316622	0.294592	0.281654	0.920741	0.405992	0.228004	0.248148	0.200139
	83.9853	0.29572	0.106292	0.311044	0.292899	0.275926	0.93699	0.399005	0.21491	0.243513	0.201943
	84.5202	0.294098	0.105025	0.317889	0.290937	0.281634	0.942914	0.402918	0.202076	0.237522	0.201221
	85.0552	0.289225	0.106044	0.323286	0.289822	0.291514	0.946821	0.399217	0.187416	0.239169	0.206441
	85.5901	0.280589	0.100281	0.320144	0.28001	0.304069	0.960014	0.384479	0.171764	0.249519	0.211794
	86.125	0.277806	0.0904365	0.306557	0.27626	0.320461	0.954756	0.375912	0.166156	0.258884	0.210437
	86.66	0.273023	0.0874753	0.30187	0.284231	0.331123	0.913984	0.378209	0.156764	0.263773	0.204937
	87.1949	0.269546	0.0898742	0.298688	0.27836	0.332867	0.878284	0.377177	0.152628	0.261501	0.198958
	87.7299	0.272558	0.0919431	0.294922	0.264476	0.327495	0.861855	0.365991	0.14862	0.25059	0.195544
	88.2648	0.271134	0.0925265	0.285345	0.253837	0.320099	0.853484	0.356535	0.143386	0.236962	0.193756
	88.7997	0.265197	0.0897554	0.26597	0.25018	0.32274	0.8608	0.333101	0.136181	0.229668	0.19186
	89.3347	0.255128	0.0844349	0.239156	0.258206	0.328097	0.880474	0.316451	0.12242	0.226608	0.189666
	89.8696	0.252781	0.0795338	0.225931	0.268867	0.333099	0.900987	0.308549	0.110876	0.224064	0.190309
	90.4045	0.253526	0.0758956	0.221175	0.282961	0.333347	0.904136	0.301842	0.104512	0.222173	0.18404
	90.9395	0.257313	0.0757972	0.219137	0.284998	0.32327	0.906318	0.294728	0.105919	0.214874	0.174735
	91.4744	0.261736	0.0768234	0.217311	0.285334	0.303966	0.896599	0.287035	0.104278	0.206502	0.173011
	92.0094	0.264303	0.0772116	0.213147	0.28588	0.288231	0.878116	0.282967	0.10165	0.205052	0.173345
	92.5443	0.27019	0.0791923	0.207818	0.279965	0.290009	0.862265	0.276714	0.0971373	0.205824	0.174955
	93.0792	0.276476	0.0828866	0.200254	0.272188	0.297753	0.837362	0.271579	0.0932579	0.208394	0.170565
	93.6142	0.274673	0.0802843	0.194068	0.262655	0.306109	0.80769	0.265009	0.0933384	0.207524	0.166297
	94.1491	0.271054	0.077588	0.195717	0.258496	0.322393	0.779696	0.261984	0.0940374	0.206188	0.165322
	94.6841	0.269363	0.0792605	0.193732	0.254409	0.343926	0.725509	0.261486	0.0929392	0.203671	0.166303
	95.219	0.274527	0.0838957	0.196767	0.245562	0.349402	0.683773	0.267962	0.0906303	0.207169	0.167453
	95.7539	0.277903	0.0871673	0.18753	0.227596	0.353065	0.661339	0.282322	0.0914363	0.215189	0.163822
	96.2889	0.280875	0.0868772	0.177694	0.226791	0.354803	0.680071	0.293359	0.0969716	0.218263	0.15875
	96.8238	0.280253	0.0883672	0.174722	0.230105	0.365176	0.711166	0.302671	0.0969098	0.216689	0.151389
	97.3587	0.276938	0.0858362	0.169181	0.228719	0.360126	0.722909	0.312065	0.0968926	0.212613	0.144459
	97.8937	0.275412	0.0843809	0.17095	0.229629	0.345191	0.753082	0.317245	0.0942186	0.206574	0.143513
	98.4286	0.272579	0.0873543	0.170851	0.234358	0.328885	0.783034	0.326966	0.0987088	0.20282	0.144714
	98.9636	0.267192	0.0880279	0.171095	0.239644	0.315398	0.806486	0.329442	0.0998281	0.202135	0.14145
	99.4985	0.254083	0.0862101	0.178121	0.241911	0.296004	0.809643	0.326569	0.0961498	0.199771	0.148311
	100.033	0.235314	0.0879759	0.182116	0.240003	0.281862	0.806092	0.316283	0.0923159	0.197508	0.156904
	100.568	0.224282	0.0858171	0.180493	0.236303	0.273657	0.79204	0.306083	0.0884923	0.193531	0.152999
	101.103	0.218054	0.0836619	0.172924	0.231948	0.266512	0.763615	0.296853	0.0876096	0.188352	0.141372
	101.638	0.213129	0.081831	0.168085	0.220472	0.246473	0.735713	0.292678	0.0901945	0.183558	0.136747
	102.173	0.211274	0.0783943	0.166311	0.20197	0.231911	0.712299	0.290708	0.0922521	0.178464	0.139548
	102.708	0.209822	0.0777567	0.160563	0.181755	0.22195	0.680679	0.290271	0.09557	0.174107	0.144345
	103.243	0.2042	0.0788896	0.1569	0.171678	0.218238	0.67009	0.294378	0.0945014	0.174946	0.154168
	103.778	0.189945	0.0829267	0.153972	0.162955	0.217188	0.670366	0.29293	0.0866742	0.173847	0.158497
	104.313	0.174205	0.0872472	0.159107	0.154572	0.217694	0.672144	0.287359	0.083026	0.164391	0.165501
	104.848	0.16231	0.0904158	0.160301	0.161173	0.221915	0.685783	0.278511	0.0824473	0.162761	0.172239
	105.383	0.154244	0.0874717	0.156506	0.158229	0.222633	0.693874	0.270106	0.0826581	0.160103	0.176446
	105.918	0.15098	0.0815987	0.153526	0.154122	0.224458	0.692842	0.265109	0.0850538	0.15241	0.177195
	106.453	0.150732	0.0785816	0.156056	0.153201	0.232236	0.700461	0.258961	0.088977	0.150649	0.179792
	106.988	0.153748	0.0756971	0.162592	0.153264	0.231988	0.701049	0.253175	0.0942544	0.153041	0.171822
	107.523	0.157095	0.0745077	0.163129	0.152818	0.236225	0.684927	0.252741	0.0989157	0.151751	0.16311
	108.058	0.156557	0.0749116	0.164049	0.148234	0.246792	0.649797	0.25202	0.100287	0.146003	0.153886
	108.592	0.155003	0.0764021	0.161379	0.140859	0.250792	0.640948	0.252814	0.100526	0.141884	0.152394
	109.127	0.151978	0.0745923	0.155376	0.144407	0.245116	0.637083	0.258592	0.107416	0.139095	0.153046
	109.662	0.150672	0.0772515	0.153822	0.15809	0.227507	0.630868	0.268114	0.11655	0.131128	0.152333
	110.197	0.150454	0.0826811	0.15756	0.158852	0.209133	0.613244	0.273121	0.117689	0.125719	0.159113
	110.732	0.150582	0.0881388	0.161117	0.152965	0.196828	0.605233	0.28125	0.114542	0.125568	0.162813
	111.267	0.152868	0.0858414	0.167324	0.144676	0.19163	0.593851	0.285887	0.11479	0.127678	0.159473
	111.802	0.154136	0.0822087	0.167395	0.141336	0.188543	0.587582	0.283355	0.114006	0.125742	0.159519
	112.337	0.157606	0.0852536	0.163294	0.14277	0.186157	0.571185	0.284766	0.108642	0.125504	0.159319
	112.872	0.164668	0.0875299	0.162044	0.146204	0.191123	0.540691	0.284264	0.100701	0.126469	0.159383
	113.407	0.170236	0.0869241	0.167147	0.155685	0.197689	0.517086	0.287972	0.0936468	0.123619	0.164034
	113.942	0.164751	0.0907517	0.172254	0.159221	0.20572	0.510282	0.290193	0.084324	0.113139	0.162509
	114.477	0.15924	0.0978305	0.179246	0.166305	0.204302	0.50381	0.285233	0.0785486	0.105767	0.159431
	115.012	0.158681	0.104233	0.188583	0.174351	0.198315	0.509896	0.27646	0.0724688	0.106114	0.15281
	115.547	0.161211	0.11137	0.200182	0.182338	0.19711	0.503452	0.265746	0.0707851	0.109671	0.149125
	116.082	0.15962	0.116364	0.209185	0.175926	0.203798	0.480116	0.258912	0.0701311	0.117699	0.149112
	116.617	0.155776	0.120778	0.20926	0.167719	0.205377	0.460037	0.246599	0.0629638	0.126296	0.151996
	117.151	0.151134	0.120261	0.215078	0.157457	0.208729	0.443374	0.234458	0.0540157	0.128208	0.150039
	117.686	0.149647	0.115325	0.216035	0.150959	0.208978	0.418999	0.22591	0.0471707	0.126443	0.142954
	118.221	0.151699	0.106119	0.209851	0.145386	0.200153	0.396559	0.223363	0.0446157	0.120701	0.138792
	118.756	0.152789	0.0941646	0.206729	0.140533	0.193334	0.396892	0.224054	0.047053	0.12092	0.138657
	119.291	0.15254	0.086193	0.204998	0.134738	0.192105	0.401112	0.223594	0.0535976	0.123048	0.137854
	119.826	0.152161	0.0826166	0.207703	0.13319	0.185483	0.406591	0.225547	0.0602324	0.120952	0.136126
	120.361	0.149354	0.0826583	0.207851	0.132839	0.177931	0.407351	0.235501	0.0651111	0.117943	0.136815
	120.896	0.14817	0.0864491	0.202633	0.126909	0.172407	0.412148	0.24052	0.0702604	0.112276	0.142292
	121.431	0.147491	0.0889019	0.198734	0.118477	0.164264	0.427414	0.240958	0.0679039	0.110029	0.148326
	121.966	0.142243	0.0923187	0.195959	0.11127	0.156547	0.439469	0.241552	0.0618342	0.116298	0.153299
	122.501	0.137016	0.0936588	0.189877	0.105122	0.159415	0.455227	0.247928	0.0615392	0.119452	0.157518
	123.036	0.132696	0.0969073	0.184836	0.106476	0.16579	0.449877	0.258817	0.0615416	0.120354	0.158018
	123.571	0.1275	0.0973259	0.181393	0.111585	0.174515	0.455027	0.272688	0.0601317	0.119354	0.156906
	124.106	0.128246	0.0956251	0.181604	0.114725	0.177995	0.475508	0.284887	0.0576685	0.118513	0.159253
	124.641	0.12762	0.0953532	0.18309	0.113855	0.173759	0.495709	0.294453	0.0592494	0.117126	0.162538
	125.176	0.125691	0.0988905	0.17743	0.118323	0.172055	0.509193	0.304935	0.0585082	0.109841	0.160427
	125.71	0.125731	0.103017	0.169452	0.125989	0.171177	0.51454	0.323317	0.0554607	0.107415	0.157303
	126.245	0.123079	0.10371	0.158245	0.137207	0.173402	0.513839	0.339729	0.0553683	0.109885	0.155024
	126.78	0.1231	0.10247	0.150265	0.143041	0.168528	0.514006	0.355716	0.0564196	0.111993	0.155544
	127.315	0.119657	0.105418	0.14621	0.14507	0.157286	0.517775	0.36534	0.0579139	0.117518	0.150992
	127.85	0.121905	0.103287	0.140062	0.143513	0.145746	0.514244	0.359003	0.0559658	0.124859	0.145881
	128.385	0.12435	0.0932918	0.137587	0.144544	0.135895	0.51892	0.347015	0.0556144	0.130265	0.146905
	128.92	0.12368	0.0851659	0.138217	0.146024	0.135256	0.516483	0.3348	0.0554769	0.130063	0.151305
	129.455	0.118587	0.0852048	0.135374	0.145319	0.14482	0.50763	0.32137	0.0528219	0.127566	0.159702
	129.99	0.106132	0.0859949	0.132934	0.146567	0.152902	0.492624	0.316423	0.0571881	0.123456	0.166345
	130.525	0.0977193	0.087108	0.129286	0.14608	0.146767	0.478952	0.319862	0.0654326	0.118875	0.160428
	131.06	0.0952883	0.0865131	0.126214	0.145684	0.137633	0.468393	0.321373	0.0676955	0.114907	0.149753
	131.595	0.0931618	0.0860781	0.121521	0.144911	0.134099	0.456618	0.322305	0.0698534	0.107515	0.141208
	132.13	0.0900459	0.0903702	0.119675	0.140968	0.1335	0.437897	0.315829	0.0741154	0.0979832	0.134738
	132.665	0.0867533	0.0940411	0.117469	0.139834	0.132392	0.450569	0.300739	0.0764276	0.0942959	0.129473
	133.2	0.0862494	0.0915053	0.115261	0.126915	0.133744	0.468658	0.29003	0.077913	0.0932192	0.124467
	133.735	0.0865012	0.0902203	0.111454	0.115763	0.135065	0.493092	0.279076	0.0792398	0.0904166	0.12483
	134.269	0.0866192	0.0879091	0.10522	0.108597	0.137906	0.50694	0.266248	0.0778161	0.0866504	0.120986
	134.804	0.0858826	0.0864836	0.101697	0.103342	0.135958	0.515075	0.247662	0.0759733	0.082633	0.118638
	135.339	0.086807	0.089512	0.0998348	0.106353	0.133558	0.540836	0.230313	0.0772468	0.0819323	0.116776
	135.874	0.0899059	0.0904106	0.0985703	0.10874	0.130207	0.54363	0.210326	0.0797206	0.0809538	0.11487
	136.409	0.0915365	0.0888925	0.101285	0.107007	0.134699	0.547477	0.195593	0.0832064	0.082959	0.115004
	136.944	0.0945363	0.0882664	0.102021	0.104719	0.127381	0.540419	0.179658	0.0793772	0.0848854	0.115917
	137.479	0.0966577	0.0894602	0.101761	0.10828	0.121417	0.510521	0.16651	0.0682549	0.0833394	0.119201
	138.014	0.0984117	0.0876363	0.100956	0.112383	0.124681	0.489565	0.16958	0.0614455	0.0853231	0.121943
	138.549	0.103492	0.0845847	0.0976142	0.113536	0.121676	0.464611	0.180241	0.0586056	0.0877482	0.121198
	139.084	0.107746	0.0820071	0.0923766	0.112274	0.109531	0.433243	0.191099	0.0540304	0.0846625	0.120065
	139.619	0.109991	0.0822143	0.0937508	0.109026	0.0986182	0.41976	0.196261	0.0487945	0.0796866	0.121261
	140.154	0.109068	0.0794225	0.0937129	0.105787	0.10198	0.408514	0.202299	0.0491924	0.0786884	0.126938
	140.689	0.108726	0.0795169	0.0971867	0.10671	0.102856	0.398384	0.204756	0.0494064	0.0763676	0.131945
	141.224	0.109764	0.0818661	0.104848	0.110703	0.0961855	0.406268	0.21205	0.0493835	0.071252	0.134641
	141.759	0.111526	0.0887841	0.111349	0.120762	0.0919144	0.431636	0.213083	0.0482763	0.0687472	0.133599
	142.294	0.113557	0.0969735	0.112367	0.127277	0.0902569	0.432552	0.20987	0.0492399	0.0686703	0.135167
	142.828	0.117147	0.0998347	0.111865	0.127737	0.0913053	0.417684	0.207347	0.0490919	0.0658413	0.137211
	143.363	0.120605	0.0988323	0.113334	0.128797	0.0972844	0.396124	0.210656	0.050542	0.0668503	0.138421
	143.898	0.119377	0.0940559	0.112915	0.132559	0.0951317	0.390135	0.220329	0.0492001	0.0704865	0.134953
	144.433	0.116783	0.0914789	0.112283	0.137397	0.091291	0.394373	0.222924	0.0487783	0.0749238	0.131485
	144.968	0.117035	0.0945467	0.109102	0.139013	0.0869347	0.385283	0.223144	0.0453678	0.0782211	0.127549
	145.503	0.115693	0.0972067	0.107348	0.134441	0.0805252	0.359354	0.22341	0.0400773	0.0804481	0.12474
	146.038	0.116298	0.098674	0.108811	0.134277	0.0830108	0.339336	0.216644	0.0377765	0.0810978	0.126031
	146.573	0.114653	0.0977759	0.104579	0.140102	0.0927021	0.335415	0.213998	0.0383049	0.0819003	0.129102
	147.108	0.110652	0.0960106	0.0999198	0.14378	0.103748	0.330329	0.2135	0.0397016	0.0874349	0.127954
	147.643	0.109282	0.0938928	0.0909066	0.136268	0.107699	0.324343	0.214361	0.0443333	0.0926578	0.125782
	148.178	0.108219	0.0909132	0.0852892	0.122226	0.111014	0.329911	0.216677	0.0519874	0.0892532	0.1211
	148.713	0.105862	0.0876469	0.0803217	0.104357	0.112582	0.336867	0.219219	0.0582821	0.0825877	0.119148
	149.248	0.103978	0.0897188	0.0814092	0.0926047	0.109365	0.356561	0.222466	0.057639	0.077893	0.116973
	149.783	0.101317	0.0935936	0.0814097	0.0865484	0.104182	0.373508	0.223844	0.0577886	0.079099	0.114121
	150.318	0.0989893	0.0979074	0.0831676	0.0884953	0.103987	0.369159	0.228025	0.0597625	0.0790013	0.116662
	150.853	0.0976554	0.100694	0.0867973	0.0931755	0.101496	0.351014	0.225791	0.0640748	0.0807341	0.124249
	151.387	0.0973309	0.106757	0.0888869	0.0939911	0.0994798	0.335753	0.223391	0.0696111	0.0864193	0.126417
	151.922	0.0980539	0.109717	0.084517	0.0928687	0.105834	0.319053	0.218571	0.0714746	0.0913446	0.130454
	152.457	0.0978843	0.109969	0.0793636	0.0857771	0.108645	0.305602	0.209479	0.069919	0.0936798	0.130995
	152.992	0.0956125	0.110525	0.0778459	0.077722	0.110623	0.305237	0.204682	0.06584	0.0903579	0.128739
	153.527	0.0943315	0.111396	0.0835489	0.0805149	0.116449	0.298336	0.201883	0.0600113	0.0839222	0.124971
	154.062	0.0917911	0.112448	0.088322	0.0792247	0.117276	0.301221	0.197151	0.051406	0.0829574	0.11787
	154.597	0.0891611	0.113868	0.0954837	0.0786171	0.124171	0.310206	0.197709	0.0492354	0.0843192	0.115352
	155.132	0.087234	0.116226	0.0989985	0.0774896	0.129531	0.318949	0.20031	0.0537714	0.0883207	0.114429
	155.667	0.0871713	0.116213	0.102436	0.0827959	0.113584	0.324649	0.201254	0.0592303	0.0914236	0.114454
	156.202	0.0861313	0.115596	0.100298	0.077101	0.0982747	0.329883	0.200408	0.0698306	0.0860609	0.113756
	156.737	0.0809319	0.113458	0.0951114	0.0717157	0.0933412	0.336769	0.189818	0.0784213	0.0784132	0.114059
	157.272	0.0752748	0.11173	0.0909116	0.0612477	0.0944994	0.344089	0.17551	0.0795682	0.0747047	0.120522
	157.807	0.0733626	0.109538	0.0884615	0.0594142	0.091182	0.345318	0.154595	0.0790879	0.0695526	0.123697
	158.342	0.0766343	0.10836	0.0870954	0.0630305	0.0900471	0.334505	0.1375	0.0765909	0.0683749	0.123578
	158.877	0.0857674	0.110508	0.0904406	0.0659295	0.0917259	0.332507	0.127784	0.0753126	0.0709194	0.121713
	159.412	0.0967892	0.112242	0.093031	0.0643599	0.0943808	0.322778	0.126841	0.077116	0.0727142	0.124464
	159.947	0.108108	0.111604	0.0886535	0.0586489	0.0872478	0.322655	0.125882	0.0775614	0.0717049	0.126003
	160.481	0.111913	0.114005	0.0822699	0.0609229	0.0800609	0.316448	0.123545	0.0771482	0.0729687	0.13325
	161.016	0.105604	0.116714	0.075251	0.0639182	0.0753225	0.299557	0.116469	0.0761825	0.0712789	0.139107
	161.551	0.0980506	0.120135	0.0756989	0.0635488	0.0706481	0.289454	0.110655	0.0765908	0.0663278	0.15046
	162.086	0.0947961	0.125555	0.0767521	0.0692232	0.0726594	0.28003	0.109089	0.0778056	0.0648851	0.158783
	162.621	0.0995884	0.13033	0.0761024	0.0756891	0.084812	0.276197	0.110082	0.0751553	0.0701713	0.16942
	163.156	0.106753	0.133605	0.0788484	0.0756681	0.0992265	0.275909	0.115173	0.0736248	0.0746718	0.170391
	163.691	0.109506	0.13236	0.0822428	0.0738143	0.107774	0.266898	0.124306	0.0710682	0.0757721	0.164795
	164.226	0.104002	0.132828	0.0836763	0.0716158	0.114995	0.256054	0.129445	0.0709808	0.0805187	0.157606
	164.761	0.0978713	0.137781	0.0802509	0.0776678	0.115348	0.248948	0.132554	0.0721097	0.0835347	0.151252
	165.296	0.09264	0.145517	0.0730758	0.0760163	0.115673	0.256001	0.13714	0.0721657	0.0825196	0.154505
	165.831	0.0855677	0.154916	0.0690684	0.0697368	0.117068	0.266833	0.135061	0.071012	0.0764998	0.156852
	166.366	0.0835273	0.166964	0.067793	0.0623472	0.117321	0.27195	0.124073	0.0689525	0.0741079	0.156075
	166.901	0.0823649	0.17412	0.0655051	0.0620111	0.11506	0.264729	0.112026	0.0685877	0.0748489	0.154267
	167.436	0.0758578	0.176613	0.0622409	0.0648714	0.112273	0.258215	0.10594	0.069223	0.0783453	0.158181
	167.971	0.0662529	0.174577	0.0616564	0.0627916	0.109015	0.255273	0.105167	0.071498	0.0812945	0.160437
	168.506	0.0591334	0.167228	0.0659989	0.0611021	0.108371	0.25272	0.104625	0.0773701	0.0806568	0.159559
	169.04	0.0552124	0.162558	0.0653856	0.0569268	0.110971	0.247572	0.107013	0.0845315	0.0769776	0.162796
	169.575	0.0489379	0.163254	0.0610612	0.0550068	0.107389	0.244325	0.112126	0.0884532	0.0743715	0.168529
	170.11	0.0445967	0.160935	0.0535478	0.0519106	0.107962	0.242382	0.121423	0.0905539	0.0746352	0.173328
	170.645	0.0444262	0.150805	0.053325	0.0555598	0.10813	0.237554	0.134928	0.0910768	0.0767088	0.170662
	171.18	0.0411449	0.141022	0.0577282	0.0537757	0.109129	0.242071	0.142978	0.0927915	0.0821336	0.168609
	171.715	0.0411383	0.136151	0.0614595	0.0506891	0.114217	0.247536	0.145771	0.0945798	0.0817645	0.170309
	172.25	0.0431806	0.137701	0.0619897	0.0476016	0.117325	0.251862	0.150144	0.0914176	0.0819518	0.170393
	172.785	0.0457046	0.139864	0.0599838	0.0462061	0.115982	0.254969	0.152345	0.0905364	0.0819768	0.170374
	173.32	0.0522895	0.146747	0.0589171	0.044161	0.110253	0.251762	0.153019	0.094693	0.0811876	0.16993
	173.855	0.0597225	0.149816	0.0652167	0.0462936	0.102883	0.247658	0.150684	0.0966608	0.0757341	0.168368
	174.39	0.0573537	0.145977	0.0698762	0.0425327	0.0968443	0.248795	0.151033	0.0961875	0.0723231	0.17303
	174.925	0.0529537	0.141509	0.0684728	0.0363482	0.0959315	0.249423	0.154134	0.0955554	0.0762547	0.186703
	175.46	0.054115	0.140589	0.0660249	0.03711	0.0960139	0.25712	0.156367	0.0907014	0.0803157	0.19431
	175.995	0.0602492	0.144358	0.0650422	0.0401538	0.100121	0.26759	0.158404	0.0817582	0.082785	0.191471
	176.53	0.0647481	0.144915	0.0692547	0.0386016	0.102869	0.273184	0.15886	0.07399	0.0826533	0.194755
	177.065	0.0637813	0.146431	0.0704243	0.0362288	0.103419	0.266284	0.164224	0.0689319	0.0846517	0.194991
	177.599	0.0612878	0.151026	0.0777115	0.0335604	0.107401	0.261162	0.167178	0.0651271	0.087898	0.194628
	178.134	0.0605781	0.157419	0.0816134	0.0300948	0.111296	0.26008	0.169835	0.0633513	0.0878838	0.190631
	178.669	0.0665977	0.16158	0.078909	0.0300202	0.115025	0.269714	0.170846	0.0661933	0.082156	0.164722
	179.204	0.0677744	0.166677	0.0772651	0.0373189	0.114183	0.276951	0.168158	0.0688253	0.0770746	0.148176
	179.739	0.0687517	0.1718	0.0807605	0.0373339	0.116508	0.278945	0.161224	0.070917	0.0732082	0.140328
	180.274	0.0704975	0.17697	0.0781894	0.0329811	0.113848	0.270407	0.152521	0.0718298	0.0707949	0.141022
	180.809	0.0640135	0.183846	0.071448	0.0339752	0.10486	0.252931	0.148577	0.0728852	0.0744557	0.138303
	181.344	0.0522221	0.191619	0.0712033	0.0384861	0.107853	0.239484	0.140914	0.0733154	0.0737352	0.133753
	181.879	0.0429298	0.193072	0.0714771	0.0403503	0.109667	0.225166	0.135479	0.0721691	0.0721614	0.128942
	182.414	0.021445	0.162912	0.0733699	0.0418955	0.10597	0.210604	0.134982	0.0689849	0.0673217	0.126708
	182.949	0.0183824	0.152811	0.0740497	0.0376403	0.105843	0.196826	0.133943	0.0658016	0.0653294	0.131968
	183.484	0.0164729	0.149643	0.0685835	0.0568191	0.109236	0.191656	0.126412	0.0627114	0.0658951	0.140963
	184.019	0.0138713	0.15161	0.0646235	0.0483693	0.114452	0.201713	0.120643	0.0633494	0.0642447	0.144704
	184.554	0.0122267	0.150993	0.0606498	0.0489743	0.120872	0.21802	0.113175	0.0679624	0.066904	0.142708
	185.089	0.00834446	0.148782	0.0572611	0.0489564	0.120527	0.224973	0.112093	0.0726938	0.0718281	0.142214
	185.624	0.00390095	0.147127	0.0552429	0.0463574	0.112791	0.22231	0.109698	0.082194	0.0727578	0.145528
	186.158	0.000755809	0.147965	0.0538111	0.0445009	0.105111	0.216717	0.110933	0.0860477	0.0721623	0.148951
	186.693	-0.000121307	0.151601	0.0551546	0.0504023	0.100225	0.206362	0.115691	0.0871537	0.0730024	0.149739
	187.228	0.000652467	0.158967	0.0585682	0.0488023	0.0925916	0.197689	0.119717	0.0856417	0.070124	0.144892
	187.763	0.00158162	0.164615	0.0608804	0.042503	0.088311	0.190772	0.128206	0.0854369	0.0668356	0.141877
	188.298	0.00232484	0.165433	0.059784	0.0354731	0.0864728	0.185333	0.136627	0.0893927	0.0710735	0.145127
	188.833	0.00490361	0.163754	0.0560976	0.0378414	0.0866809	0.180065	0.140367	0.044423	0.0772326	0.146053
	189.368	0.00648366	0.165628	0.0530591	0.0486342	0.0874923	0.171624	0.144892	0.0433607	0.0836878	0.145287
	189.903	0.00537915	0.171808	0.0566191	0.0511257	0.0837129	0.161224	0.145837	0.0412468	0.0853032	0.151591
	190.438	0.00302848	0.179541	0.066835	0.0456485	0.0817764	0.150891	0.142205	0.0388945	0.0820518	0.152231
	190.973	0.000873248	0.190218	0.0759308	0.0381342	0.084082	0.148274	0.143648	0.0394994	0.0785614	0.144174
	191.508	-0.00192901	0.19726	0.0826095	0.0365546	0.0809674	0.144824	0.145086	0.0390518	0.0730598	0.139344
	192.043	-0.00338887	0.200738	0.0865197	0.0359282	0.0733449	0.14507	0.145415	0.0423734	0.0666344	0.103736
	192.578	-0.0039749	0.206644	0.0842917	0.0349023	0.0691877	0.158577	0.147494	0.0464063	0.0637415	0.104711
	193.113	-0.00556101	0.212809	0.0802039	0.0302131	0.0619395	0.176639	0.154263	0.0441457	0.0642615	0.106971
	193.648	-0.00852635	0.218674	0.0794173	0.027237	0.0601029	0.193424	0.159714	0.0426274	0.0662102	0.112853
	194.183	-0.0121032	0.220494	0.0797754	0.0259209	0.0614088	0.205051	0.168162	0.0397388	0.0655207	0.119243
	194.717	-0.0127707	0.222373	0.077667	0.0266416	0.0622532	0.219527	0.171785	0.0400271	0.0681481	0.118069
	195.252	-0.0119086	0.223171	0.0779004	0.0276969	0.0644381	0.232775	0.176748	0.0411218	0.0696478	0.113343
	195.787	-0.0123162	0.222917	0.0820898	0.027359	0.0707875	0.238374	0.178217	0.0433891	0.0722623	0.106698
	196.322	-0.0144846	0.225951	0.0850478	0.0205172	0.079029	0.237117	0.174197	0.0466072	0.0756625	0.0979757
	196.857	-0.0187965	0.229	0.0847142	0.014887	0.0870548	0.233523	0.177047	0.0511218	0.0755984	0.092948
	197.392	-0.0216129	0.103688	0.0742709	0.0216942	0.0875544	0.226332	0.182845	0.0513885	0.072565	0.0887693
	197.927	-0.024958	0.103292	0.0675604	0.0230503	0.0823723	0.213684	0.192584	0.0511494	0.0712853	0.084121
	198.462	-0.02785	0.103493	0.0622813	0.0199052	0.0820382	0.201443	0.201512	0.0222151	0.0683285	0.0842553
	198.997	-0.0300938	0.0963189	0.0574486	0.0176072	0.0812861	0.19006	0.207862	0.0233178	0.0618805	0.0805746
	199.532	-0.0312494	0.0881277	0.0553338	0.0146031	0.0783032	0.180313	0.210989	0.0264165	0.0605678	0.075829
	200.067	-0.0327797	0.0874063	0.0556369	0.00864145	0.0747281	0.180459	0.211702	0.0299345	0.0623812	0.0770946

## Sheet: acvr1ba+1bb MO+1bb mRNA dorsal
	Figure 4 - figure supplement 1
	acvr1b-a-/- + acvr1b-b MO + acvr1b-b mRNA, dorsal view
		Background-subtracted and normalized intensity in acvr1b-a-/- + acvr1b-b MO + acvr1b-b mRNA embryos, dorsal view
	Distance (µm)	Embryo
		1	2	3	4	5	6	7
	0	1.15964	1.91639	2.00783	2.0203	1.5957	0.970702	1.59631
	0.534938	1.10425	1.90859	2.00449	2.00356	1.65483	0.977881	1.60905
	1.06988	1.01551	1.90986	2.00528	1.9385	1.68073	0.968856	1.60215
	1.60481	0.944298	1.92052	2.00155	1.89335	1.70899	0.94774	1.55618
	2.13975	0.918044	1.90019	1.99449	1.81846	1.73649	0.905774	1.5186
	2.67469	0.910113	1.82857	1.98415	1.76207	1.74922	0.858157	1.49081
	3.20963	0.875496	1.77342	1.97188	1.72373	1.75029	0.804907	1.45666
	3.74457	0.829739	1.75063	1.94077	1.69826	1.73889	0.77028	1.43348
	4.27951	0.80669	1.7943	1.90063	1.6614	1.72244	0.738086	1.43561
	4.81444	0.817748	1.87708	1.86542	1.6128	1.70433	0.706969	1.45457
	5.34938	0.822849	1.98061	1.83738	1.60805	1.67671	0.700518	1.47408
	5.88432	0.844035	2.05117	1.80408	1.61105	1.63663	0.709374	1.45412
	6.41926	0.892295	2.06348	1.76658	1.65076	1.65139	0.719715	1.40293
	6.9542	0.949331	2.06352	1.74347	1.64469	1.59232	0.713698	1.34981
	7.48913	1.00991	2.0762	1.74561	1.65048	1.54089	0.696424	1.3228
	8.02407	1.10084	2.06795	1.75095	1.62586	1.5665	0.69343	1.29403
	8.55901	1.20909	2.03647	1.7546	1.64184	1.61278	0.687658	1.26853
	9.09395	1.31444	2.00649	1.77507	1.66517	1.64651	0.677827	1.24895
	9.62889	1.40731	2.00857	1.79999	1.67053	1.67577	0.654867	1.21915
	10.1638	1.5003	2.01008	1.8395	1.68927	1.68068	0.637338	1.19234
	10.6988	1.5835	1.99797	1.88038	1.69392	1.67192	0.641875	1.18558
	11.2337	1.6559	1.97577	1.91563	1.67801	1.66295	0.656767	1.19118
	11.7686	1.70832	1.94535	1.93383	1.66599	1.65023	0.662	1.18487
	12.3036	1.74558	1.91752	1.93418	1.68548	1.62568	0.657461	1.17813
	12.8385	1.76534	1.9406	1.917	1.68546	1.62269	0.640775	1.19546
	13.3735	1.7633	1.97518	1.875	1.70513	1.61103	0.620793	1.19764
	13.9084	1.72678	1.97703	1.81546	1.71425	1.55855	0.598503	1.15254
	14.4433	1.66498	1.96497	1.73413	1.72564	1.5029	0.570995	1.08859
	14.9783	1.61915	1.92764	1.65719	1.69427	1.42218	0.553423	1.04656
	15.5132	1.58477	1.87581	1.58967	1.69959	1.37332	0.583178	1.02264
	16.0481	1.58083	1.81912	1.54105	1.72866	1.36734	0.626262	1.00069
	16.5831	1.58395	1.77269	1.5098	1.76781	1.36984	0.666589	0.969663
	17.118	1.55889	1.74629	1.46633	1.79915	1.37058	0.710147	0.958852
	17.653	1.53085	1.71349	1.42892	1.84094	1.37291	0.730426	0.948503
	18.1879	1.53781	1.67105	1.41343	1.89804	1.38302	0.738622	0.957717
	18.7228	1.58394	1.64459	1.42022	1.95669	1.40494	0.744134	0.98363
	19.2578	1.64006	1.65066	1.45261	2.02105	1.43919	0.745749	1.02605
	19.7927	1.69688	1.66098	1.49105	2.02783	1.4748	0.735554	1.0743
	20.3276	1.75904	1.67494	1.50195	2.02683	1.49583	0.714801	1.12819
	20.8626	1.77368	1.69618	1.50231	2.03526	1.51547	0.702184	1.18831
	21.3975	1.79075	1.71104	1.51737	2.07182	1.5224	0.69002	1.23541
	21.9325	1.78661	1.75599	1.53724	2.05129	1.51895	0.675503	1.25828
	22.4674	1.79838	1.84737	1.57305	2.04026	1.51185	0.65912	1.27559
	23.0023	1.80253	1.92625	1.59035	2.05232	1.49285	0.631561	1.25704
	23.5373	1.79594	1.95892	1.60246	2.06996	1.4586	0.596426	1.20316
	24.0722	1.77356	1.99599	1.57783	2.08348	1.4359	0.556891	1.16367
	24.6072	1.73597	2.03943	1.55313	2.09434	1.41357	0.531499	1.12333
	25.1421	1.6805	2.05031	1.52714	2.11232	1.39348	0.509341	1.07167
	25.677	1.61703	2.03097	1.52235	2.10316	1.38229	0.491341	1.03138
	26.212	1.52199	1.99765	1.55165	2.09212	1.39479	0.480086	0.967736
	26.7469	1.39623	1.99223	1.5878	2.07198	1.38013	0.482358	0.890125
	27.2818	1.28161	1.98722	1.60916	2.05044	1.35521	0.498193	0.830035
	27.8168	1.23027	1.97364	1.63492	2.04443	1.34643	0.508121	0.77977
	28.3517	1.22658	1.96744	1.67137	2.04208	1.34409	0.511513	0.739123
	28.8867	1.29007	1.98674	1.69998	2.02	1.3308	0.506492	0.714442
	29.4216	1.30705	2.00987	1.75249	2.02482	1.30066	0.492665	0.711974
	29.9565	1.28789	2.00533	1.81425	2.06831	1.27831	0.492893	0.705397
	30.4915	1.27908	2.05213	1.84108	2.09956	1.27328	0.493861	0.701192
	31.0264	1.28715	2.10388	1.83732	2.11143	1.27105	0.476851	0.690761
	31.5614	1.27943	2.16615	1.82604	2.13252	1.25591	0.45677	0.710413
	32.0963	1.27722	2.18088	1.8337	2.15077	1.23292	0.45734	0.749561
	32.6312	1.25775	2.20193	1.82594	2.16888	1.20445	0.461349	0.769904
	33.1662	1.24749	2.2819	1.81421	2.18793	1.19702	0.476533	0.806741
	33.7011	1.22853	2.39559	1.79294	2.19926	1.2114	0.487914	0.865446
	34.236	1.19111	2.51536	1.76475	2.18101	1.22126	0.502682	0.898353
	34.771	1.10743	2.61852	1.70768	2.17158	1.22758	0.512871	0.944181
	35.3059	1.02518	2.65304	1.62192	2.16975	1.22989	0.508091	0.979342
	35.8409	0.969966	2.64494	1.52014	2.16311	1.22179	0.506192	0.973969
	36.3758	0.927912	2.61104	1.41927	2.14351	1.22522	0.516012	0.98203
	36.9107	0.908462	2.56139	1.34971	2.139	1.20301	0.53444	0.973779
	37.4457	0.888639	2.49148	1.30659	2.15216	1.19025	0.544299	0.925685
	37.9806	0.865086	2.42341	1.29654	2.1613	1.21044	0.532932	0.878002
	38.5155	0.8242	2.36876	1.30011	2.15648	1.249	0.505785	0.829013
	39.0505	0.784071	2.29058	1.26305	2.14721	1.28784	0.484007	0.775763
	39.5854	0.730762	2.1918	1.23785	2.13954	1.30972	0.459456	0.731711
	40.1204	0.661035	2.06762	1.24369	2.1324	1.30491	0.442282	0.697576
	40.6553	0.606562	1.97514	1.25839	2.161	1.26901	0.427698	0.676521
	41.1902	0.531038	1.92346	1.27669	2.2106	1.20385	0.417273	0.662422
	41.7252	0.459047	1.89777	1.2784	2.24308	1.14506	0.413054	0.651464
	42.2601	0.420139	1.90137	1.26385	2.2728	1.11595	0.406641	0.632661
	42.7951	0.391644	1.93811	1.23099	2.28797	1.09916	0.40255	0.623238
	43.33	0.356575	1.96377	1.19646	2.30419	1.09467	0.402011	0.60378
	43.8649	0.325023	1.97369	1.17785	2.24067	1.08779	0.407782	0.577456
	44.3999	0.338032	2.03001	1.18211	2.22105	1.10725	0.420239	0.567576
	44.9348	0.362245	2.06075	1.19476	2.20874	1.13126	0.420879	0.574523
	45.4697	0.393565	2.05037	1.21086	2.15806	1.15833	0.419485	0.580513
	46.0047	0.444918	2.01568	1.22212	2.12857	1.16559	0.425103	0.570462
	46.5396	0.467222	1.96152	1.22669	2.08998	1.16001	0.426783	0.545704
	47.0746	0.526466	1.93849	1.2356	2.05059	1.15221	0.436495	0.521938
	47.6095	0.565231	1.9653	1.23432	2.03669	1.18623	0.443668	0.510957
	48.1444	0.582977	1.97056	1.22963	2.03148	1.18275	0.44201	0.50392
	48.6794	0.587599	1.94758	1.22841	2.03843	1.17064	0.437482	0.489339
	49.2143	0.597614	1.96042	1.22966	2.07322	1.15682	0.434281	0.470303
	49.7492	0.613493	1.93796	1.23523	2.06623	1.14829	0.428507	0.444195
	50.2842	0.627051	1.92459	1.23471	2.05721	1.1318	0.418968	0.429145
	50.8191	0.630707	1.90955	1.22172	2.00018	1.12251	0.406151	0.424619
	51.3541	0.63573	1.85293	1.20536	1.93657	1.10657	0.395576	0.424604
	51.889	0.657795	1.77338	1.18326	1.89094	1.08079	0.38378	0.430261
	52.4239	0.665703	1.75722	1.15245	1.84468	1.11423	0.375573	0.439218
	52.9589	0.671124	1.89513	1.13345	1.75372	1.14098	0.364154	0.443569
	53.4938	0.656827	1.97286	1.11011	1.6865	1.16852	0.355862	0.434493
	54.0288	0.636974	1.94222	1.08014	1.66965	1.19438	0.353471	0.433408
	54.5637	0.633573	1.9396	1.05326	1.65435	1.2275	0.363384	0.433669
	55.0986	0.637198	1.97076	1.01761	1.63678	1.23837	0.38097	0.43473
	55.6336	0.646552	1.96479	0.977179	1.65644	1.23264	0.396369	0.432677
	56.1685	0.647891	1.93963	0.946969	1.62223	1.20535	0.412071	0.430283
	56.7034	0.604507	1.91496	0.910408	1.61227	1.17239	0.424939	0.430239
	57.2384	0.529996	1.86197	0.867286	1.63169	1.13766	0.438683	0.422303
	57.7733	0.469337	1.81477	0.827681	1.63151	1.1452	0.44928	0.407992
	58.3083	0.419511	1.78791	0.795561	1.68854	1.16945	0.446245	0.402608
	58.8432	0.401073	1.78929	0.782145	1.70484	1.16655	0.434602	0.395177
	59.3781	0.371548	1.77727	0.789082	1.73903	1.14322	0.426086	0.395174
	59.9131	0.358275	1.75984	0.803291	1.76072	1.12624	0.421065	0.388723
	60.448	0.346708	1.72874	0.792315	1.74099	1.07674	0.408408	0.378241
	60.9829	0.337521	1.68215	0.784729	1.71913	0.989972	0.39896	0.373324
	61.5179	0.337829	1.64141	0.778634	1.68714	0.923179	0.387797	0.36971
	62.0528	0.333171	1.59552	0.783627	1.6581	0.918379	0.362229	0.349505
	62.5878	0.309219	1.54062	0.80018	1.64742	0.918387	0.330449	0.344268
	63.1227	0.273964	1.47204	0.813854	1.63124	0.914402	0.302771	0.353047
	63.6576	0.248974	1.39876	0.826611	1.64523	0.886857	0.287397	0.350699
	64.1926	0.22459	1.36453	0.833447	1.68122	0.857767	0.281076	0.349139
	64.7275	0.17984	1.39279	0.831476	1.69905	0.805261	0.278707	0.342235
	65.2625	0.132349	1.43284	0.829263	1.68978	0.79352	0.280232	0.340186
	65.7974	0.104108	1.44844	0.828501	1.67428	0.794694	0.288189	0.347673
	66.3323	0.0848294	1.44497	0.821218	1.66851	0.797042	0.296315	0.350883
	66.8673	0.0868203	1.4201	0.803789	1.67655	0.799085	0.308063	0.354164
	67.4022	0.0956642	1.3913	0.777455	1.63747	0.806552	0.330758	0.342179
	67.9371	0.109307	1.34999	0.758041	1.59368	0.821443	0.350887	0.324072
	68.4721	0.0973966	1.31041	0.745959	1.55621	0.830813	0.359368	0.314521
	69.007	0.0948517	1.28646	0.713034	1.49284	0.83229	0.367518	0.311735
	69.542	0.0903065	1.2797	0.672425	1.45295	0.821647	0.364035	0.307676
	70.0769	0.0857036	1.22687	0.625433	1.37078	0.811949	0.351465	0.307086
	70.6118	0.0878239	1.12599	0.581519	1.30218	0.791471	0.346344	0.304188
	71.1468	0.0565187	1.07665	0.547555	1.22066	0.763953	0.351455	0.291742
	71.6817	0.0442913	1.05319	0.526395	1.15973	0.736751	0.347936	0.283391
	72.2167	0.041215	1.04665	0.513307	1.10249	0.715423	0.336101	0.285649
	72.7516	0.0361604	1.01372	0.501234	1.07622	0.691559	0.31589	0.292861
	73.2865	0.044086	1.034	0.497605	1.0639	0.677109	0.293095	0.297266
	73.8215	0.0581903	1.06018	0.50204	1.08447	0.683849	0.275331	0.294112
	74.3564	0.05253	1.06364	0.511692	1.08322	0.694474	0.253334	0.294217
	74.8913	0.0297734	1.0717	0.514725	1.09715	0.708806	0.236161	0.297964
	75.4263	0.0259166	1.07934	0.531766	1.11745	0.711749	0.2306	0.294909
	75.9612	0.0359452	1.10017	0.544302	1.11872	0.714129	0.230432	0.287337
	76.4962	0.0594536	1.13415	0.54786	1.12418	0.719707	0.2355	0.273144
	77.0311	0.0592965	1.20604	0.552907	1.10693	0.709118	0.236473	0.260382
	77.566	0.0608519	1.21896	0.555574	1.07099	0.695624	0.242051	0.259886
	78.101	0.0535744	1.18599	0.555476	1.09277	0.675432	0.24604	0.255405
	78.6359	0.0626654	1.1751	0.556772	1.11147	0.661885	0.247441	0.246725
	79.1708	0.0815029	1.16118	0.567309	1.15305	0.651792	0.250091	0.240203
	79.7058	0.114446	1.11396	0.581282	1.18946	0.639879	0.261502	0.238122
	80.2407	0.132276	1.08736	0.56174	1.2146	0.641923	0.27677	0.246843
	80.7757	0.138925	1.07303	0.53896	1.18869	0.637251	0.291311	0.253493
	81.3106	0.154356	1.05145	0.53427	1.16427	0.64856	0.304908	0.269189
	81.8455	0.193645	1.03887	0.536574	1.15835	0.656791	0.328286	0.286019
	82.3805	0.2153	1.02593	0.551145	1.11525	0.652921	0.345098	0.298015
	82.9154	0.233414	1.0552	0.564441	1.09523	0.621624	0.354452	0.309663
	83.4504	0.26912	1.0547	0.579261	1.07017	0.579768	0.354528	0.312516
	83.9853	0.309426	1.06099	0.603481	1.08082	0.546643	0.344346	0.295821
	84.5202	0.326619	1.065	0.628591	1.04783	0.535643	0.336448	0.27122
	85.0552	0.366086	1.0593	0.634513	1.00993	0.532867	0.327918	0.246746
	85.5901	0.372158	1.03034	0.632478	0.963525	0.541915	0.322658	0.220893
	86.125	0.364821	0.993654	0.617967	0.953305	0.555465	0.315504	0.192423
	86.66	0.350217	0.96557	0.605188	0.948962	0.54874	0.300349	0.178793
	87.1949	0.328732	0.962302	0.596589	0.967479	0.534807	0.285709	0.180372
	87.7299	0.32566	0.960857	0.564553	0.978998	0.513162	0.272397	0.179338
	88.2648	0.328691	0.915966	0.550786	0.961785	0.491671	0.261357	0.167035
	88.7997	0.326566	0.877231	0.528823	0.955084	0.470131	0.252717	0.158309
	89.3347	0.321744	0.875536	0.506447	0.930271	0.463866	0.245874	0.149498
	89.8696	0.278308	0.872717	0.47816	0.909057	0.463001	0.235139	0.142009
	90.4045	0.230963	0.853531	0.460971	0.8601	0.458182	0.237579	0.146404
	90.9395	0.221861	0.839016	0.456228	0.843684	0.442656	0.251236	0.143599
	91.4744	0.195741	0.851062	0.44824	0.781026	0.429	0.269833	0.135941
	92.0094	0.177021	0.878268	0.452769	0.741795	0.391807	0.276144	0.136446
	92.5443	0.183785	0.922151	0.450339	0.6979	0.364092	0.27155	0.134322
	93.0792	0.194331	0.921328	0.435825	0.66134	0.341376	0.270091	0.142191
	93.6142	0.195331	0.908122	0.418701	0.652396	0.324585	0.276895	0.150383
	94.1491	0.173434	0.890822	0.396648	0.665171	0.308429	0.286122	0.139099
	94.6841	0.150247	0.849923	0.377557	0.660188	0.30349	0.283066	0.13029
	95.219	0.119235	0.805303	0.359376	0.642901	0.305364	0.271427	0.147811
	95.7539	0.105757	0.778632	0.339188	0.630622	0.318306	0.260391	0.1571
	96.2889	0.0816291	0.78944	0.316062	0.612167	0.326126	0.245699	0.147589
	96.8238	0.079691	0.794516	0.300409	0.603362	0.325894	0.22709	0.142096
	97.3587	0.0940879	0.789791	0.302883	0.605236	0.324023	0.209542	0.141122
	97.8937	0.0890924	0.794672	0.308174	0.635726	0.325448	0.19908	0.144666
	98.4286	0.0787444	0.822703	0.311802	0.684476	0.327141	0.193618	0.140628
	98.9636	0.072415	0.841353	0.325215	0.755676	0.333721	0.189058	0.122073
	99.4985	0.0912818	0.85974	0.336654	0.803435	0.34542	0.178929	0.107708
	100.033	0.101777	0.857556	0.344041	0.811461	0.353404	0.173679	0.101472
	100.568	0.0982337	0.836955	0.349674	0.813536	0.345406	0.177079	0.104006
	101.103	0.0629303	0.850946	0.350825	0.834491	0.329471	0.178992	0.111495
	101.638	0.0322696	0.83847	0.350991	0.865216	0.313835	0.174194	0.107052
	102.173	0.0136504	0.798137	0.370527	0.892423	0.300748	0.170597	0.0977203
	102.708	0.0150403	0.759464	0.389717	0.907121	0.290044	0.178357	0.0924752
	103.243	0.00413271	0.735786	0.404769	0.90353	0.271005	0.188107	0.103255
	103.778	0.00124861	0.752858	0.407911	0.89482	0.249172	0.194903	0.115865
	104.313	0.0142006	0.765908	0.410614	0.923629	0.236889	0.190891	0.113061
	104.848	0.0285232	0.758782	0.417639	0.936108	0.233779	0.185949	0.0942283
	105.383	0.0370404	0.752058	0.417211	0.970803	0.237793	0.178518	0.091886
	105.918	0.0117484	0.757057	0.398057	0.965443	0.2349	0.168992	0.0965475
	106.453	-0.000345526	0.772985	0.37107	0.946669	0.235004	0.161789	0.0974763
	106.988	-0.00433479	0.787559	0.343544	0.935547	0.229942	0.155722	0.0936236
	107.523	-0.0117212	0.789224	0.318595	0.940737	0.232732	0.152447	0.0766846
	108.058	-0.00228676	0.779279	0.299628	0.946169	0.239759	0.144461	0.0709423
	108.592	-0.00656657	0.769772	0.285474	0.961751	0.250983	0.137708	0.0784416
	109.127	0.00844184	0.732317	0.278239	0.95274	0.253398	0.128167	0.0962859
	109.662	0.00216268	0.698816	0.279304	0.956709	0.245672	0.118749	0.107197
	110.197	0.00523054	0.676009	0.294402	0.946959	0.242961	0.108282	0.115861
	110.732	0.0193045	0.67433	0.306398	0.964014	0.238544	0.10212	0.101648
	111.267	0.0313947	0.697647	0.312104	0.991601	0.244355	0.0965145	0.0894627
	111.802	0.0493956	0.718656	0.309191	1.03179	0.25683	0.0987413	0.0808127
	112.337	0.0446368	0.720999	0.299016	1.07545	0.262605	0.100949	0.0824715
	112.872	0.0502359	0.675645	0.286448	1.08888	0.264321	0.0982141	0.0852537
	113.407	0.0578636	0.630861	0.278264	1.04181	0.260364	0.0972074	0.0842736
	113.942	0.0524462	0.622047	0.279092	1.01526	0.261215	0.0996614	0.0847805
	114.477	0.0514421	0.639985	0.271587	0.974276	0.259356	0.100811	0.0839276
	115.012	0.0431133	0.670831	0.25455	0.929088	0.250437	0.101075	0.0828227
	115.547	0.0409538	0.713153	0.250242	0.912037	0.233058	0.101289	0.0827744
	116.082	0.0524174	0.724899	0.238689	0.856425	0.224635	0.0977839	0.0893726
	116.617	0.057103	0.749092	0.241384	0.816611	0.222712	0.08995	0.0912756
	117.151	0.0667248	0.745656	0.244553	0.823294	0.225478	0.0840582	0.0852342
	117.686	0.0918812	0.721946	0.239098	0.795997	0.226225	0.0825188	0.0821746
	118.221	0.090195	0.679446	0.245909	0.746686	0.224524	0.0821928	0.0768914
	118.756	0.0790947	0.637777	0.258796	0.677403	0.222762	0.0770925	0.0774244
	119.291	0.0739243	0.6311	0.264082	0.625122	0.223943	0.0702237	0.0733943
	119.826	0.0819128	0.636775	0.258521	0.574474	0.227016	0.0679584	0.0682539
	120.361	0.0752745	0.626964	0.248748	0.512729	0.233361	0.0658685	0.0675593
	120.896	0.0685943	0.623413	0.23841	0.432968	0.240727	0.0687225	0.06707
	121.431	0.0638392	0.587531	0.241413	0.366781	0.246418	0.0689822	0.0663526
	121.966	0.0767566	0.545365	0.249443	0.332644	0.260299	0.0660451	0.0627166
	122.501	0.0948826	0.502568	0.254639	0.311884	0.282847	0.06593	0.0606115
	123.036	0.119178	0.464179	0.254267	0.288314	0.308611	0.0687652	0.0619507
	123.571	0.134623	0.453553	0.260508	0.251726	0.311951	0.0693018	0.0557675
	124.106	0.118286	0.469742	0.255357	0.224881	0.298682	0.0706878	0.0535452
	124.641	0.0815751	0.477809	0.250724	0.210542	0.291222	0.0697938	0.0525027
	125.176	0.0643224	0.465971	0.26251	0.210107	0.29474	0.067867	0.0491765
	125.71	0.0376174	0.46617	0.277143	0.232523	0.305863	0.0630969	0.056535
	126.245	0.0290028	0.475601	0.280918	0.265207	0.323164	0.0588776	0.0637968
	126.78	0.0360237	0.476707	0.279595	0.296087	0.341624	0.0579546	0.0672634
	127.315	0.0549884	0.457263	0.267694	0.312513	0.362292	0.0596491	0.0703011
	127.85	0.0512709	0.427226	0.265766	0.352813	0.379522	0.0641184	0.0734223
	128.385	0.0450294	0.451961	0.268445	0.371592	0.390019	0.068935	0.073993
	128.92	0.0380629	0.509366	0.269728	0.375436	0.391078	0.0672702	0.0856791
	129.455	0.0353285	0.545032	0.272088	0.361176	0.37225	0.0650864	0.0858345
	129.99	0.0468131	0.53957	0.26951	0.33838	0.341629	0.0619868	0.0727566
	130.525	0.0645496	0.509803	0.261197	0.311623	0.316017	0.0599727	0.0712992
	131.06	0.0532666	0.513004	0.252553	0.282574	0.306098	0.0574154	0.0613638
	131.595	0.0372959	0.545821	0.243772	0.247255	0.294621	0.0575065	0.0513956
	132.13	0.0424982	0.568707	0.233855	0.228069	0.288117	0.05478	0.0488744
	132.665	0.0568773	0.602592	0.22624	0.207134	0.300813	0.0548558	0.0532207
	133.2	0.0539597	0.640038	0.215774	0.199302	0.320157	0.0538497	0.0551028
	133.735	0.066739	0.661675	0.210211	0.197575	0.333288	0.0531564	0.0598285
	134.269	0.0735223	0.651505	0.207235	0.200963	0.355264	0.0500775	0.0656583
	134.804	0.0602211	0.646729	0.200413	0.205088	0.374695	0.0470595	0.0688172
	135.339	0.0737521	0.639438	0.191589	0.196272	0.386126	0.0457548	0.062727
	135.874	0.083986	0.600347	0.185376	0.179101	0.384199	0.0471321	0.0539034
	136.409	0.0809684	0.549277	0.184722	0.158265	0.352874	0.0476851	0.0595427
	136.944	0.0771299	0.506853	0.197379	0.12808	0.297012	0.0431801	0.066241
	137.479	0.0745971	0.459237	0.202787	0.107284	0.26951	0.041284	0.0689998
	138.014	0.0732411	0.41193	0.206175	0.125469	0.278712	0.0412731	0.0636626
	138.549	0.0729076	0.373249	0.206134	0.120136	0.299177	0.0373478	0.0669092
	139.084	0.0800056	0.335085	0.205939	0.104619	0.316427	0.0358214	0.0733329
	139.619	0.0790999	0.319911	0.204222	0.098339	0.31881	0.0334399	0.0809822
	140.154	0.0806071	0.318459	0.204416	0.0960531	0.310711	0.0282037	0.076052
	140.689	0.0863727	0.310008	0.202855	0.0822737	0.289304	0.0245419	0.0659852
	141.224	0.0795643	0.301831	0.197252	0.0744141	0.273574	0.0230031	0.0506596
	141.759	0.0719705	0.298795	0.189261	0.0813585	0.27513	0.0227384	0.0450145
	142.294	0.0562187	0.30004	0.181923	0.0875701	0.281544	0.0209601	0.0461568
	142.828	0.0652296	0.294071	0.182573	0.0880815	0.295426	0.0156343	0.0478756
	143.363	0.0601556	0.276091	0.185382	0.0766674	0.309913	0.00944547	0.0479443
	143.898	0.062456	0.258117	0.190882	0.0730235	0.312776	0.00248321	0.0524645
	144.433	0.0595436	0.248394	0.199029	0.0555094	0.314958	-0.00319054	0.0470436
	144.968	0.0714685	0.233605	0.198894	0.0508001	0.3195	-0.00868398	0.047498
	145.503	0.0809647	0.220098	0.193506	0.0543314	0.322554	-0.0120701	0.0559614
	146.038	0.105297	0.235985	0.186031	0.0670955	0.330319	-0.0141943	0.0603911
	146.573	0.117537	0.243333	0.178978	0.0812245	0.33684	-0.0167614	0.0598309
	147.108	0.139953	0.242706	0.178025	0.0975287	0.336845	-0.0172298	0.0588378
	147.643	0.165807	0.263716	0.173564	0.112585	0.333033	-0.0170279	0.0611572
	148.178	0.187408	0.279369	0.174721	0.126776	0.330047	-0.0106085	0.0628123
	148.713	0.204525	0.288492	0.170471	0.147556	0.337296	-0.00802687	0.0623334
	149.248	0.208748	0.279036	0.163156	0.165967	0.344742	-0.011773	0.0672519
	149.783	0.196016	0.245938	0.15665	0.188611	0.338335	-0.0132329	0.0678608
	150.318	0.184574	0.224309	0.156678	0.192503	0.321449	-0.0162739	0.0587111
	150.853	0.180444	0.226524	0.151272	0.191438	0.28824	-0.0189233	0.0482796
	151.387	0.195978	0.236978	0.145583	0.17192	0.275139	-0.0184956	0.0445507
	151.922	0.214876	0.243103	0.136387	0.150103	0.291821	-0.0216029	0.0454843
	152.457	0.222571	0.253675	0.133061	0.150608	0.317512	-0.0234588	0.0478353
	152.992	0.239571	0.269943	0.134132	0.133702	0.32975	-0.023417	0.0413624
	153.527	0.233496	0.26888	0.13506	0.103506	0.336305	-0.0219664	0.042509
	154.062	0.241544	0.259243	0.126334	0.113411	0.333452	-0.0249005	0.0490738
	154.597	0.245092	0.271204	0.114816	0.142816	0.329278	-0.0235228	0.0530315
	155.132	0.242395	0.310756	0.105289	0.170132	0.323881	-0.023405	0.0484186
	155.667	0.248195	0.327023	0.100477	0.189125	0.327664	-0.02225	0.039091
	156.202	0.253518	0.316843	0.0951353	0.180442	0.330464	-0.0226086	0.0283816
	156.737	0.253345	0.308405	0.0927594	0.178171	0.329099	-0.0213554	0.0337682
	157.272	0.243554	0.303857	0.0893317	0.18443	0.325956	-0.0205967	0.0511214
	157.807	0.261973	0.30222	0.088167	0.195032	0.323398	-0.0195922	0.0544023
	158.342	0.256214	0.297629	0.0889114	0.202892	0.330834	-0.0194247	0.0502123
	158.877	0.25247	0.289004	0.0912249	0.208693	0.33399	-0.0198487	0.0499141
	159.412	0.251307	0.265843	0.0910017	0.210471	0.332833	-0.0243416	0.0515062
	159.947	0.249884	0.274839	0.0909278	0.207555	0.332651	-0.0306187	0.0581588
	160.481	0.252249	0.301667	0.0917568	0.20606	0.33057	-0.0358155	0.068082
	161.016	0.262761	0.294195	0.0904091	0.210319	0.33029	-0.0397791	0.0801203
	161.551	0.287626	0.275171	0.0936853	0.217027	0.318568	-0.0439999	0.0809202
	162.086	0.303312	0.271855	0.0997144	0.21716	0.309649	-0.0435455	0.065582
	162.621	0.295605	0.24173	0.102317	0.236553	0.31356	-0.0448896	0.0540775
	163.156	0.28429	0.197569	0.104638	0.250286	0.313822	-0.0473935	0.0456368
	163.691	0.267346	0.163131	0.102862	0.295952	0.312462	-0.046454	0.0407639
	164.226	0.265509	0.153585	0.100531	0.336285	0.325594	-0.0520399	0.0405289
	164.761	0.264803	0.156734	0.100866	0.360726	0.3333	-0.0563029	0.0595263
	165.296	0.272522	0.159925	0.103098	0.375325	0.340985	-0.057235	0.0663582
	165.831	0.292575	0.1754	0.111507	0.396075	0.348713	-0.0565636	0.0544158
	166.366	0.288953	0.175694	0.115863	0.420891	0.349517	-0.055382	0.0353124
	166.901	0.293556	0.170322	0.114246	0.417097	0.34838	-0.0545251	0.0221369
	167.436	0.310309	0.16318	0.110831	0.416811	0.335463	-0.0527888	0.0135871
	167.971	0.325825	0.156562	0.107713	0.396536	0.330371	-0.0536147	0.0197545
	168.506	0.326748	0.157361	0.109986	0.362528	0.324957	-0.0552355	0.037103
	169.04	0.315894	0.154144	0.110224	0.324638	0.315054	-0.0556373	0.0407669
	169.575	0.31775	0.149623	0.098285	0.295621	0.303321	-0.0574679	0.0386942
	170.11	0.328469	0.147321	0.0906448	0.263526	0.289633	-0.0624583	0.0415837
	170.645	0.351341	0.13788	0.0914327	0.256347	0.289329	-0.0688096	0.0363359
	171.18	0.388821	0.125541	0.0877824	0.245887	0.297404	-0.0729058	0.0276379
	171.715	0.409921	0.129299	0.0775258	0.232417	0.298456	-0.0745793	0.0230862
	172.25	0.39949	0.132527	0.0732586	0.199487	0.285402	-0.0767623	0.0207261
	172.785	0.403817	0.128367	0.0649114	0.212925	0.279805	-0.0769553	0.0239247
	173.32	0.415651	0.13328	0.0731607	0.228536	0.275518	-0.0790716	0.0315225
	173.855	0.438045	0.139248	0.0734615	0.2403	0.27192	-0.0805255	0.0372992
	174.39	0.457738	0.126535	0.0741158	0.249468	0.269805	-0.0830858	0.0351302
	174.925	0.495361	0.116782	0.0737329	0.252153	0.27415	-0.0859037	0.0293509
	175.46	0.515762	0.110763	0.0757925	0.247251	0.279098	-0.0892353	0.0328411
	175.995	0.506543	0.116733	0.0813627	0.235494	0.284903	-0.0929586	0.0314754
	176.53	0.487358	0.125727	0.0854044	0.213193	0.295688	-0.0926067	0.02803
	177.065	0.465906	0.133182	0.0825794	0.21748	0.305406	-0.0930199	0.0251447
	177.599	0.477101	0.138072	0.0829155	0.21059	0.31451	-0.0938106	0.0323561
	178.134	0.495006	0.135383	0.0856084	0.190642	0.324312	-0.0939948	0.0328437
	178.669	0.507467	0.127896	0.0863647	0.189549	0.332197	-0.095062	0.0315885
	179.204	0.510497	0.114978	0.0853025	0.189168	0.33741	-0.0967746	0.012642
	179.739	0.494815	0.115191	0.0860487	0.217225	0.333602	-0.100148	-0.00503367
	180.274	0.48652	0.117851	0.0832498	0.277741	0.335171	-0.102064	-0.0154879
	180.809	0.490341	0.118331	0.084521	0.344015	0.34384	-0.101514	-0.0155565
	181.344	0.494194	0.120094	0.0891354	0.416887	0.350711	-0.102811	-0.0175918
	181.879	0.480733	0.119623	0.0886546	0.441502	0.362485	-0.103385	-0.020712
	182.414	0.469631	0.115971	0.087015	0.461842	0.372	-0.104466	-0.0256868
	182.949	0.462218	0.115952	0.0950863	0.471242	0.373078	-0.105091	-0.0239661
	183.484	0.446368	0.117214	0.0995238	0.448346	0.38113	-0.104699	-0.0229129
	184.019	0.437841	0.113057	0.0990026	0.420383	0.383735	-0.104073	-0.0240605
	184.554	0.426517	0.104427	0.0975736	0.388297	0.374184	-0.1055	-0.0209493
	185.089	0.396502	0.100047	0.0950343	0.350516			-0.0225769
	185.624	0.37572	0.106635	0.0941022	0.311747			-0.0247257
	186.158	0.383872	0.114725	0.0919673	0.280236			-0.0214239
	186.693	0.379268	0.112057	0.09131	0.264345			-0.0214277
	187.228	0.352361	0.102514	0.0944809	0.262156			-0.0203579
	187.763	0.344766	0.102248	0.0937909	0.277852			-0.0189734
	188.298	0.366503	0.0976683	0.0939393	0.278057			-0.0219235
	188.833	0.396246	0.0944214	0.0985467	0.252935			-0.018399
	189.368		0.0929527	0.0983658	0.224674			-0.0198375
	189.903		0.10084	0.0929579	0.222795			-0.0355271
	190.438		0.111723	0.0906585	0.243388			-0.0570763
	190.973		0.130267	0.0937094	0.268473			-0.0705536
	191.508		0.146976	0.0957054	0.278532			-0.0772142
	192.043		0.164504	0.0918706	0.297756			-0.0756298
	192.578		0.177617	0.0958404	0.349231			-0.0642063
	193.113		0.176287	0.102185	0.385648			-0.0566106
	193.648		0.153914	0.104786	0.400095			-0.0503027
	194.183		0.122089	0.108143	0.396323			-0.0476622
	194.717		0.109406	0.110782	0.399077			-0.0440542
	195.252		0.0954496	0.114026	0.411492
	195.787		0.0970194	0.1115	0.39753
	196.322		0.097453	0.112243	0.358726
	196.857		0.0972241	0.115027	0.29453
	197.392		0.110294	0.118393	0.235912
	197.927		0.122834	0.12197	0.17907
	198.462		0.113171	0.113521	0.143157
	198.997		0.0987721	0.0988348
	199.532		0.0960052	0.0932743
	200.067		0.095819	0.0890574

## Sheet: WT+acvr1bb MO lateral
	Figure 4 - figure supplement 1
	WT + acvr1b-b MO, lateral view
		Background-subtracted and normalized intensity in wild-type + acvr1b-b MO embryos, lateral view
	Distance (µm)	Embryo
		1	2	3	4	5	6	7	8	9	10
	0	1.23399	1.38934	1.68796	1.22221	0.913993	0.729784	1.19579	0.684462	1.7868	1.04977
	0.534938	1.31844	1.40123	1.66281	1.22737	0.879635	0.745221	1.10651	0.640535	1.79489	1.05685
	1.06988	1.38248	1.39555	1.60157	1.19674	0.856082	0.761471	1.06687	0.604964	1.80741	1.07206
	1.60481	1.41994	1.39382	1.59989	1.16393	0.855352	0.772852	1.03095	0.615039	1.80665	1.08428
	2.13975	1.4432	1.38704	1.56013	1.15545	0.861342	0.793854	1.01396	0.624698	1.83073	1.1049
	2.67469	1.43969	1.38142	1.55696	1.15317	0.86735	0.834777	0.987018	0.645311	1.85428	1.09016
	3.20963	1.44568	1.35251	1.53744	1.12991	0.880999	0.885892	0.945613	0.645498	1.8652	1.09059
	3.74457	1.43778	1.32255	1.56494	1.12566	0.873831	0.919622	0.90889	0.658795	1.8746	1.10035
	4.27951	1.41685	1.31716	1.58624	1.12499	0.859618	0.924449	0.850836	0.663129	1.87546	1.11132
	4.81444	1.43106	1.3036	1.62575	1.12082	0.853473	0.925907	0.822089	0.667924	1.8884	1.07286
	5.34938	1.3867	1.27281	1.62049	1.11779	0.836712	0.942291	0.846567	0.661776	1.87682	1.05131
	5.88432	1.35481	1.25227	1.61149	1.11185	0.818791	0.996545	0.869713	0.648255	1.83624	1.02429
	6.41926	1.33173	1.20897	1.58603	1.0659	0.834085	1.03848	0.884965	0.634547	1.81249	0.996132
	6.9542	1.30584	1.16709	1.57419	1.01937	0.833235	1.07245	0.897828	0.622989	1.76132	0.954397
	7.48913	1.30972	1.16625	1.58957	0.97619	0.843168	1.09624	0.906563	0.635027	1.7379	0.932412
	8.02407	1.33494	1.18106	1.60359	0.945247	0.840255	1.10877	0.898711	0.647077	1.7128	0.918896
	8.55901	1.34089	1.20344	1.58889	0.951505	0.830875	1.13597	0.870749	0.667223	1.69926	0.911582
	9.09395	1.31588	1.18436	1.58519	0.980317	0.806747	1.16293	0.846086	0.661639	1.68399	0.907184
	9.62889	1.27016	1.16066	1.55083	1.01211	0.781685	1.18111	0.82135	0.646167	1.67355	0.910432
	10.1638	1.21782	1.13056	1.51662	1.05264	0.748418	1.17732	0.816088	0.62658	1.66662	0.915319
	10.6988	1.17171	1.12128	1.50121	1.08596	0.724109	1.13834	0.816072	0.612326	1.68181	0.889113
	11.2337	1.12927	1.1236	1.44966	1.13165	0.73751	1.06282	0.836799	0.597615	1.668	0.863966
	11.7686	1.10377	1.12431	1.4341	1.12536	0.764976	1.00625	0.835988	0.568865	1.6768	0.845961
	12.3036	1.08633	1.12769	1.40493	1.10643	0.769432	0.977362	0.810544	0.548566	1.65043	0.838917
	12.8385	1.07504	1.12868	1.40822	1.10508	0.737754	0.95905	0.794068	0.529194	1.62988	0.839049
	13.3735	1.04614	1.11231	1.41266	1.0942	0.702466	0.937318	0.786957	0.515701	1.60977	0.830023
	13.9084	1.03456	1.08246	1.39981	1.07671	0.707436	0.921445	0.778481	0.515258	1.57308	0.818953
	14.4433	1.04889	1.04508	1.38555	1.05046	0.72095	0.913509	0.764091	0.53532	1.56302	0.806523
	14.9783	1.05597	1.02114	1.34877	1.02719	0.7397	0.910075	0.740037	0.54496	1.56541	0.800512
	15.5132	1.06458	1.01795	1.32457	1.00131	0.746419	0.897076	0.729531	0.535755	1.57287	0.783232
	16.0481	1.0847	1.00937	1.34075	0.984656	0.779545	0.89288	0.727229	0.52658	1.55856	0.786315
	16.5831	1.07624	1.03985	1.36707	0.972437	0.789213	0.916472	0.734787	0.518461	1.54267	0.784719
	17.118	1.04896	1.06579	1.39204	0.954668	0.786695	0.940003	0.771578	0.520491	1.54492	0.808216
	17.653	1.03834	1.05666	1.39268	0.941354	0.726247	0.933596	0.793927	0.525457	1.52189	0.833836
	18.1879	1.03819	1.06828	1.39959	0.932877	0.660672	0.908189	0.810474	0.539388	1.47911	0.856766
	18.7228	1.06071	1.0953	1.40285	0.9493	0.677073	0.883057	0.809513	0.551694	1.43909	0.870741
	19.2578	1.03483	1.13299	1.38267	0.970234	0.701847	0.867603	0.817225	0.557193	1.40579	0.892585
	19.7927	0.999353	1.1388	1.38299	0.997059	0.685313	0.855891	0.807686	0.569674	1.3928	0.896537
	20.3276	0.960927	1.11479	1.37559	1.02177	0.654406	0.851993	0.790631	0.591876	1.39224	0.89174
	20.8626	0.941057	1.10482	1.4085	1.03515	0.647645	0.865183	0.783419	0.612892	1.36489	0.88164
	21.3975	0.934341	1.10677	1.37782	1.03996	0.641695	0.891356	0.779296	0.62144	1.34734	0.875815
	21.9325	0.906809	1.13049	1.32864	1.05625	0.624681	0.915699	0.76036	0.646243	1.32493	0.886481
	22.4674	0.888598	1.1537	1.32787	1.09132	0.595396	0.925606	0.739221	0.666178	1.31306	0.891463
	23.0023	0.883245	1.17092	1.32754	1.0936	0.571761	0.909347	0.716468	0.662954	1.29297	0.911392
	23.5373	0.878341	1.15342	1.34583	1.08844	0.548974	0.89775	0.694486	0.658235	1.28241	0.914649
	24.0722	0.8661	1.15735	1.34274	1.05283	0.521597	0.894164	0.688358	0.657877	1.26562	0.918243
	24.6072	0.823737	1.12502	1.32706	1.01797	0.503316	0.892355	0.66964	0.636954	1.25316	0.919369
	25.1421	0.805186	1.09143	1.30309	0.984356	0.495549	0.895644	0.648652	0.622201	1.25126	0.905584
	25.677	0.810715	1.06213	1.31435	0.949428	0.51106	0.903447	0.633559	0.588637	1.24607	0.867996
	26.212	0.819395	1.04386	1.31434	0.952543	0.518223	0.916963	0.617118	0.567234	1.25012	0.835616
	26.7469	0.816526	1.02806	1.29051	0.969231	0.534119	0.926211	0.597957	0.553405	1.27344	0.810848
	27.2818	0.804639	0.994153	1.28168	0.961986	0.549558	0.915384	0.584407	0.53031	1.28938	0.802633
	27.8168	0.817473	0.956873	1.26563	0.934306	0.550777	0.89585	0.565015	0.483729	1.29328	0.808245
	28.3517	0.831661	0.931898	1.24848	0.891635	0.530012	0.882204	0.533247	0.450928	1.29085	0.794377
	28.8867	0.8387	0.886784	1.25286	0.864442	0.528342	0.893025	0.540785	0.432152	1.26338	0.759098
	29.4216	0.852491	0.843946	1.26104	0.831984	0.545473	0.906057	0.560794	0.434782	1.25043	0.742494
	29.9565	0.852413	0.837946	1.26406	0.785775	0.536281	0.919174	0.589165	0.43553	1.23632	0.724792
	30.4915	0.834523	0.849489	1.25427	0.757938	0.519384	0.901465	0.603667	0.44128	1.22224	0.71378
	31.0264	0.826814	0.864051	1.24066	0.749235	0.510458	0.868029	0.619059	0.445326	1.21412	0.675951
	31.5614	0.809459	0.889964	1.23357	0.741322	0.520413	0.848591	0.61382	0.449312	1.22116	0.674288
	32.0963	0.79235	0.886514	1.23672	0.738187	0.528784	0.825013	0.616639	0.451514	1.21834	0.672196
	32.6312	0.757672	0.90232	1.22292	0.745523	0.540804	0.790675	0.617467	0.447124	1.22597	0.679269
	33.1662	0.70923	0.903627	1.23166	0.746634	0.556883	0.75609	0.621767	0.44113	1.20262	0.673063
	33.7011	0.677785	0.901735	1.23235	0.742065	0.5799	0.729419	0.613903	0.453659	1.16476	0.677983
	34.236	0.654901	0.906504	1.21506	0.729037	0.582717	0.694635	0.594661	0.463385	1.12035	0.679522
	34.771	0.644725	0.912853	1.21309	0.708772	0.588285	0.672862	0.588876	0.47625	1.09468	0.666786
	35.3059	0.644427	0.897272	1.23164	0.724846	0.595322	0.656364	0.579154	0.470016	1.06675	0.654465
	35.8409	0.640971	0.879545	1.22692	0.721971	0.619665	0.640458	0.580894	0.44945	1.07758	0.629425
	36.3758	0.646227	0.85732	1.21873	0.717954	0.629711	0.634122	0.568232	0.436251	1.06237	0.617955
	36.9107	0.66564	0.821974	1.18305	0.729006	0.63597	0.639418	0.540964	0.42905	1.05607	0.619349
	37.4457	0.678112	0.812859	1.13753	0.737308	0.621124	0.645835	0.514479	0.420457	1.03579	0.611784
	37.9806	0.670849	0.788258	1.10889	0.757834	0.588759	0.660772	0.493855	0.405322	0.987295	0.613274
	38.5155	0.671947	0.78363	1.07286	0.769222	0.555016	0.678124	0.481375	0.393956	0.948886	0.630161
	39.0505	0.669084	0.775299	1.06991	0.767713	0.56337	0.691991	0.49329	0.379533	0.911168	0.640732
	39.5854	0.66855	0.753895	1.04831	0.762001	0.569356	0.70134	0.498486	0.358208	0.885332	0.643265
	40.1204	0.664213	0.724149	1.03978	0.765915	0.54352	0.701554	0.485288	0.345735	0.870779	0.651564
	40.6553	0.640425	0.730729	0.992929	0.769899	0.511272	0.710392	0.478252	0.33968	0.87593	0.63885
	41.1902	0.603672	0.737681	0.932154	0.786683	0.482615	0.715946	0.480703	0.344791	0.892728	0.611941
	41.7252	0.586856	0.739157	0.931221	0.796082	0.441609	0.714498	0.480976	0.353087	0.904569	0.578061
	42.2601	0.592958	0.730045	0.952602	0.765881	0.408914	0.696542	0.480496	0.352769	0.89573	0.561552
	42.7951	0.61169	0.723497	0.958008	0.714214	0.385981	0.672372	0.46828	0.354309	0.880898	0.551899
	43.33	0.612949	0.713094	0.955974	0.674582	0.372135	0.656304	0.458139	0.343024	0.875701	0.552294
	43.8649	0.59568	0.703238	0.937228	0.651144	0.371825	0.657923	0.454339	0.337828	0.860843	0.557815
	44.3999	0.592896	0.688739	0.91441	0.64873	0.375543	0.658518	0.460476	0.34111	0.833908	0.560356
	44.9348	0.590163	0.670595	0.868328	0.643504	0.394548	0.65966	0.465995	0.343345	0.82565	0.554762
	45.4697	0.589576	0.663852	0.846252	0.634872	0.425811	0.656191	0.475165	0.339892	0.837684	0.547246
	46.0047	0.578762	0.678255	0.838248	0.65426	0.456659	0.654321	0.485029	0.327873	0.850397	0.55216
	46.5396	0.571268	0.682039	0.841199	0.64719	0.456913	0.663769	0.485498	0.32899	0.883604	0.548741
	47.0746	0.572014	0.661652	0.820821	0.644611	0.44551	0.681929	0.470156	0.323402	0.882653	0.533957
	47.6095	0.537205	0.6305	0.759872	0.636654	0.43463	0.6877	0.465845	0.31191	0.876076	0.508885
	48.1444	0.471166	0.596552	0.711449	0.633227	0.415821	0.687234	0.460858	0.30485	0.861414	0.504032
	48.6794	0.424849	0.578818	0.703325	0.623088	0.398853	0.694925	0.449153	0.301956	0.845142	0.510749
	49.2143	0.395282	0.576354	0.69419	0.611096	0.378027	0.713956	0.435454	0.30572	0.842583	0.515593
	49.7492	0.382807	0.5862	0.692876	0.594436	0.366793	0.730717	0.421316	0.300793	0.868674	0.51976
	50.2842	0.384348	0.627574	0.696204	0.583634	0.356392	0.736801	0.405879	0.288743	0.904126	0.516271
	50.8191	0.395522	0.661395	0.71318	0.574061	0.356404	0.746873	0.40559	0.280117	0.901657	0.502496
	51.3541	0.400456	0.680963	0.703215	0.558092	0.364613	0.75495	0.397884	0.265879	0.883298	0.4904
	51.889	0.38561	0.692007	0.695266	0.527417	0.368729	0.753412	0.386588	0.254046	0.870466	0.483045
	52.4239	0.368342	0.694075	0.687624	0.511446	0.366844	0.761697	0.381322	0.254728	0.884758	0.457738
	52.9589	0.356663	0.691754	0.661336	0.493277	0.369909	0.764069	0.374083	0.257591	0.896555	0.441939
	53.4938	0.34565	0.697159	0.640606	0.498651	0.363289	0.760413	0.364577	0.253154	0.881829	0.424163
	54.0288	0.338107	0.700178	0.62188	0.509755	0.360568	0.752116	0.359731	0.242754	0.849192	0.412084
	54.5637	0.334164	0.695371	0.602094	0.510438	0.350593	0.736935	0.353398	0.234827	0.82548	0.407183
	55.0986	0.342425	0.698618	0.577093	0.508502	0.337895	0.717461	0.351854	0.237435	0.808208	0.399128
	55.6336	0.355106	0.701756	0.570008	0.501974	0.317458	0.695826	0.359766	0.242201	0.791366	0.380717
	56.1685	0.376341	0.697674	0.547498	0.483255	0.315169	0.679389	0.364339	0.250414	0.784467	0.365798
	56.7034	0.396612	0.694666	0.561441	0.460141	0.327919	0.661366	0.368	0.255992	0.754309	0.364501
	57.2384	0.422181	0.666436	0.574651	0.452872	0.352342	0.641674	0.378715	0.263517	0.73097	0.369836
	57.7733	0.433281	0.649311	0.580735	0.45573	0.364285	0.618442	0.378325	0.259834	0.703703	0.371713
	58.3083	0.431476	0.618412	0.581224	0.475346	0.351356	0.595781	0.378687	0.251364	0.688926	0.381363
	58.8432	0.435124	0.595471	0.590198	0.490415	0.352163	0.567018	0.375147	0.252054	0.672769	0.394369
	59.3781	0.445287	0.55663	0.586782	0.49602	0.356895	0.549655	0.362757	0.249018	0.631201	0.395355
	59.9131	0.461068	0.529965	0.558169	0.487233	0.368607	0.541384	0.344425	0.242025	0.595928	0.395211
	60.448	0.469969	0.52423	0.518749	0.489862	0.367717	0.528034	0.344112	0.230603	0.569322	0.395472
	60.9829	0.47174	0.515137	0.47777	0.482617	0.354868	0.512188	0.350296	0.221202	0.559444	0.391727
	61.5179	0.465638	0.512435	0.441252	0.474343	0.321436	0.500509	0.355325	0.214642	0.572438	0.38899
	62.0528	0.45489	0.505335	0.401505	0.456721	0.273671	0.498248	0.34572	0.203677	0.541016	0.385193
	62.5878	0.440978	0.50184	0.370565	0.440661	0.264773	0.505647	0.339667	0.19447	0.51995	0.378706
	63.1227	0.418719	0.497095	0.334407	0.434883	0.252648	0.516539	0.335662	0.184925	0.514582	0.371033
	63.6576	0.404875	0.482247	0.337232	0.428049	0.233214	0.530743	0.335095	0.180296	0.540479	0.355841
	64.1926	0.378589	0.470458	0.356553	0.418858	0.226836	0.539281	0.341003	0.18229	0.543547	0.338256
	64.7275	0.372971	0.455105	0.372814	0.429787	0.211502	0.543183	0.333018	0.184403	0.523877	0.330672
	65.2625	0.355925	0.45012	0.386162	0.43504	0.214751	0.549854	0.31323	0.179667	0.508431	0.326279
	65.7974	0.335689	0.446386	0.397693	0.433774	0.219908	0.540917	0.302305	0.174399	0.481198	0.323439
	66.3323	0.31669	0.453457	0.403336	0.425194	0.219912	0.525087	0.296014	0.177643	0.450571	0.313085
	66.8673	0.30851	0.459908	0.397413	0.413029	0.223279	0.499635	0.297061	0.18787	0.441538	0.303186
	67.4022	0.297095	0.458673	0.400431	0.4142	0.220548	0.488422	0.305068	0.185501	0.421111	0.29787
	67.9371	0.308122	0.458527	0.405016	0.4089	0.215309	0.481787	0.313331	0.184375	0.393318	0.287641
	68.4721	0.322014	0.451411	0.430143	0.400285	0.231898	0.465414	0.312866	0.181816	0.37088	0.276569
	69.007	0.334919	0.442307	0.434622	0.40256	0.229564	0.453755	0.303034	0.176853	0.377755	0.264739
	69.542	0.349274	0.433692	0.436076	0.412204	0.224365	0.443984	0.292652	0.172811	0.374779	0.257256
	70.0769	0.363284	0.440383	0.420169	0.418711	0.215909	0.427703	0.281738	0.16669	0.384386	0.246429
	70.6118	0.361896	0.442082	0.400738	0.422428	0.210937	0.408348	0.27525	0.166547	0.37732	0.228314
	71.1468	0.345399	0.439502	0.395282	0.421593	0.205605	0.393955	0.2726	0.164009	0.364478	0.216956
	71.6817	0.335275	0.43735	0.403228	0.405049	0.196671	0.393401	0.276909	0.158912	0.360459	0.215452
	72.2167	0.331435	0.434445	0.382471	0.398848	0.180571	0.395025	0.278028	0.157015	0.374202	0.22194
	72.7516	0.326925	0.435133	0.348929	0.381522	0.175216	0.400485	0.274696	0.162597	0.403313	0.218687
	73.2865	0.312608	0.429355	0.315133	0.36486	0.17079	0.414448	0.267483	0.168945	0.426326	0.218039
	73.8215	0.280122	0.416421	0.295737	0.362836	0.172194	0.427884	0.263591	0.171338	0.451452	0.225572
	74.3564	0.249614	0.41258	0.293011	0.348069	0.180793	0.444543	0.252423	0.167797	0.485326	0.237908
	74.8913	0.230495	0.397611	0.292726	0.323132	0.196016	0.458242	0.243255	0.166309	0.508884	0.248521
	75.4263	0.219256	0.372983	0.300258	0.287227	0.214382	0.47445	0.241626	0.16691	0.506462	0.251935
	75.9612	0.223304	0.353974	0.301265	0.244396	0.220508	0.485554	0.238329	0.165016	0.50188	0.255504
	76.4962	0.227915	0.343863	0.31565	0.21571	0.221473	0.503579	0.232995	0.158027	0.492653	0.258602
	77.0311	0.227702	0.332314	0.298563	0.200639	0.224068	0.530456	0.231305	0.149796	0.489193	0.254109
	77.566	0.224095	0.332888	0.28088	0.19543	0.22706	0.548392	0.225419	0.142602	0.467603	0.246255
	78.101	0.22025	0.328161	0.27747	0.199584	0.238783	0.541998	0.225223	0.141408	0.437666	0.236113
	78.6359	0.220312	0.330379	0.257605	0.204215	0.243789	0.525701	0.229653	0.144896	0.427477	0.232709
	79.1708	0.216197	0.337002	0.250958	0.203799	0.244832	0.514518	0.227519	0.155636	0.408656	0.237938
	79.7058	0.214443	0.341835	0.248529	0.198126	0.245771	0.514626	0.22766	0.159523	0.402518	0.23568
	80.2407	0.208511	0.351388	0.219666	0.197447	0.245374	0.499825	0.229226	0.16219	0.406015	0.228882
	80.7757	0.208904	0.349302	0.190151	0.199338	0.240387	0.479106	0.233605	0.169499	0.413589	0.218125
	81.3106	0.216024	0.346348	0.15567	0.196209	0.231041	0.456204	0.231075	0.174496	0.416923	0.211721
	81.8455	0.229436	0.347228	0.113125	0.189529	0.217756	0.435428	0.224907	0.178281	0.414819	0.194062
	82.3805	0.232445	0.343382	0.0826458	0.177167	0.217326	0.409388	0.219668	0.175571	0.398258	0.176363
	82.9154	0.236495	0.324828	0.0661066	0.162709	0.213476	0.393329	0.20947	0.167198	0.380671	0.16396
	83.4504	0.226149	0.315468	0.0540488	0.150149	0.212589	0.376194	0.206014	0.161504	0.366611	0.15035
	83.9853	0.204508	0.309799	0.0405812	0.142326	0.205053	0.365393	0.192985	0.15236	0.366404	0.14163
	84.5202	0.182985	0.304747	0.0386688	0.137333	0.192964	0.359007	0.180315	0.149464	0.367552	0.131054
	85.0552	0.17077	0.302713	0.0548179	0.136989	0.175055	0.346645	0.171719	0.152302	0.349784	0.118059
	85.5901	0.162763	0.288742	0.0667408	0.137563	0.159612	0.336184	0.160218	0.165121	0.338531	0.114576
	86.125	0.157336	0.272894	0.0711892	0.1511	0.145511	0.327335	0.147282	0.171176	0.32228	0.125351
	86.66	0.147025	0.264511	0.0883567	0.160696	0.139216	0.316552	0.130892	0.164769	0.308591	0.14118
	87.1949	0.12334	0.237382	0.0958641	0.160871	0.135063	0.307356	0.115391	0.165245	0.287564	0.148619
	87.7299	0.114072	0.2249	0.0900216	0.16021	0.132592	0.300953	0.112021	0.171029	0.269462	0.152558
	88.2648	0.118235	0.219924	0.0749503	0.15673	0.130835	0.305876	0.110704	0.164326	0.250945	0.157955
	88.7997	0.119601	0.214376	0.0643999	0.147695	0.143825	0.31196	0.108816	0.155115	0.241059	0.16674
	89.3347	0.114432	0.206661	0.0529689	0.138153	0.164391	0.310439	0.108187	0.144344	0.239532	0.178181
	89.8696	0.12396	0.218335	0.0427069	0.140389	0.171969	0.307468	0.107943	0.137637	0.229657	0.18967
	90.4045	0.131961	0.218873	0.0443342	0.145077	0.164777	0.303018	0.103115	0.133854	0.225238	0.189696
	90.9395	0.122229	0.224826	0.0497128	0.153032	0.154989	0.293779	0.0973444	0.130472	0.229684	0.183886
	91.4744	0.110079	0.239659	0.0466662	0.162728	0.151854	0.288685	0.0950407	0.122148	0.239888	0.175225
	92.0094	0.105206	0.251257	0.0415573	0.173623	0.163628	0.281018	0.0967696	0.118024	0.256528	0.168186
	92.5443	0.10528	0.256636	0.0422085	0.175433	0.162691	0.279652	0.100254	0.114164	0.264741	0.157053
	93.0792	0.0957311	0.260196	0.0292696	0.168339	0.173702	0.27304	0.10442	0.113315	0.267431	0.146917
	93.6142	0.0886203	0.25676	0.0339056	0.168503	0.176333	0.264357	0.104551	0.115451	0.254548	0.13942
	94.1491	0.0834433	0.245613	0.0300552	0.173793	0.177443	0.268052	0.0981696	0.115231	0.244405	0.129021
	94.6841	0.0840599	0.229204	0.0233523	0.181333	0.170769	0.270948	0.0940713	0.113077	0.238048	0.12725
	95.219	0.0777882	0.225403	0.0163141	0.177026	0.160584	0.269478	0.0889327	0.107487	0.240805	0.127056
	95.7539	0.0658328	0.217439	0.0135867	0.17505	0.161253	0.269191	0.0837272	0.104895	0.237703	0.128283
	96.2889	0.0626133	0.212185	0.0153069	0.178028	0.16435	0.272617	0.08039	0.103644	0.237818	0.127058
	96.8238	0.0578602	0.21178	0.0282969	0.184761	0.169045	0.273218	0.0791689	0.104966	0.223808	0.124244
	97.3587	0.0580779	0.210482	0.0491741	0.174484	0.18065	0.264072	0.0782631	0.105994	0.214629	0.120467
	97.8937	0.0612032	0.216384	0.055947	0.165871	0.182555	0.248774	0.0799189	0.108312	0.207686	0.117151
	98.4286	0.0545886	0.218348	0.0662283	0.150835	0.175387	0.242918	0.0795703	0.111344	0.188713	0.114685
	98.9636	0.0456045	0.216645	0.0669368	0.144701	0.159947	0.25094	0.0834334	0.11697	0.18163	0.113487
	99.4985	0.033057	0.212614	0.0797486	0.15259	0.146929	0.247927	0.0946614	0.121512	0.18577	0.112623
	100.033	0.0252387	0.219518	0.0826472	0.164002	0.128819	0.249306	0.0996257	0.116214	0.186439	0.11782
	100.568	0.0107219	0.224576	0.0842733	0.157137	0.121684	0.253221	0.107635	0.118584	0.187789	0.121845
	101.103	0.000833615	0.221353	0.0785068	0.147467	0.119745	0.256579	0.113934	0.12473	0.186064	0.125516
	101.638	-0.00516026	0.226389	0.0580443	0.142668	0.124153	0.254344	0.115668	0.127173	0.186917	0.130969
	102.173	-0.00674361	0.218778	0.0336584	0.133506	0.133934	0.254278	0.120195	0.127875	0.189454	0.132849
	102.708	-0.0112571	0.205098	0.00318697	0.124189	0.140956	0.261432	0.120847	0.123122	0.185086	0.133381
	103.243	-0.00938657	0.189487	-0.0105807	0.117473	0.138689	0.261787	0.116505	0.11604	0.182712	0.133904
	103.778	-0.00676417	0.182098	-0.00647055	0.100166	0.130901	0.257986	0.112999	0.114823	0.178856	0.144722
	104.313	-0.00381072	0.174094	-0.00143042	0.0943978	0.13005	0.250552	0.116784	0.11317	0.168969	0.155284
	104.848	-0.00782799	0.168464	-0.0076593	0.0897887	0.119338	0.24185	0.119994	0.109782	0.154665	0.154157
	105.383	-0.00383905	0.163365	-0.0184196	0.0800499	0.110193	0.237005	0.124236	0.10563	0.153646	0.142678
	105.918	0.00551921	0.158507	-0.0263125	0.0685725	0.121385	0.234157	0.119483	0.103127	0.153448	0.135959
	106.453	0.0205937	0.150998	-0.0274567	0.0622774	0.134727	0.238238	0.120194	0.101127	0.155649	0.133416
	106.988	0.0265858	0.15136	-0.032434	0.0643623	0.150119	0.238609	0.119898	0.101426	0.165886	0.12682
	107.523	0.0205885	0.155857	-0.0290917	0.0626574	0.165635	0.233577	0.118348	0.0976464	0.175779	0.121624
	108.058	0.0156195	0.158849	-0.0237677	0.0569682	0.175509	0.223046	0.11828	0.0894518	0.176324	0.115771
	108.592	0.011687	0.157886	-0.0229247	0.0467766	0.168764	0.222957	0.111706	0.0896904	0.170389	0.106841
	109.127	0.0110647	0.156346	-0.0322294	0.0449728	0.166939	0.228999	0.10311	0.0950483	0.163897	0.098333
	109.662	0.00523873	0.159655	-0.0374757	0.0433409	0.161935	0.223585	0.0955481	0.0994269	0.153983	0.0945272
	110.197	0.00286034	0.156525	-0.0453669	0.0472956	0.161408	0.206681	0.0955622	0.100041	0.152047	0.0875305
	110.732	0.00409224	0.152374	-0.0591341	0.0523048	0.157565	0.200978	0.0903367	0.101877	0.154366	0.0827316
	111.267	0.00249106	0.155586	-0.071129	0.0553945	0.148296	0.201662	0.0864403	0.0980957	0.14941	0.0839004
	111.802	-0.00419096	0.140617	-0.0828318	0.0517341	0.1323	0.202017	0.0862258	0.0900796	0.139681	0.0819021
	112.337	-0.00280965	0.125169	-0.082846	0.067363	0.120951	0.199158	0.0911334	0.0848986	0.131409	0.0788461
	112.872	0.00346872	0.119064	-0.0713345	0.0712724	0.113442	0.19565	0.0948614	0.0805635	0.124459	0.0733071
	113.407	0.00522305	0.110484	-0.0587895	0.0758402	0.103221	0.192279	0.0925365	0.0814452	0.128956	0.0732886
	113.942	0.00865991	0.108473	-0.0502948	0.0746459	0.0992782	0.18497	0.0752165	0.0912441	0.137443	0.0738758
	114.477	0.0227147	0.106084	-0.0440547	0.0745174	0.0999882	0.182344	0.06067	0.0982701	0.140083	0.0729493
	115.012	0.0242755	0.0960401	-0.0374354	0.0667718	0.104804	0.179954	0.0539855	0.101455	0.134647	0.07559
	115.547	0.0323129	0.0919035	-0.0344113	0.0519442	0.111948	0.174595	0.0488746	0.100414	0.133586	0.0801437
	116.082	0.0423505	0.0961059	-0.0335235	0.0334417	0.118341	0.17162	0.0454777	0.10116	0.136349	0.0797765
	116.617	0.0511876	0.101774	-0.038078	0.0288865	0.125335	0.171038	0.0418871	0.0969395	0.133853	0.07771
	117.151	0.0570096	0.110747	-0.0318525	0.0222173	0.132564	0.169327	0.0365747	0.0974066	0.12814	0.079379
	117.686	0.0623347	0.11686	-0.0241629	0.0131569	0.14002	0.172937	0.0364182	0.101434	0.12129	0.0795409
	118.221	0.0588793	0.118343	-0.0148119	0.00893409	0.1374	0.180625	0.0389795	0.109489	0.111911	0.0792096
	118.756	0.0586301	0.11237	-0.0126493	0.01271	0.140231	0.18074	0.0386586	0.117315	0.109785	0.0790848
	119.291	0.045892	0.106453	-0.0225987	0.013733	0.144261	0.182954	0.0349819	0.11601	0.107039	0.0803812
	119.826	0.0361971	0.105477	-0.0450993	0.0179657	0.144843	0.190654	0.0341509	0.113681	0.112383	0.0778378
	120.361	0.0249734	0.0990535	-0.0686361	0.0182243	0.148957	0.193646	0.0364871	0.111093	0.134231	0.0730118
	120.896	0.0120717	0.0886852	-0.0850931	0.0217032	0.158193	0.190671	0.0355781	0.113973	0.146485	0.0708258
	121.431	-0.000961625	0.0751229	-0.0901848	0.0245084	0.151434	0.191989	0.038634	0.114453	0.143977	0.0764547
	121.966	-0.00446886	0.0646476	-0.0882858	0.0236829	0.143901	0.19613	0.0472326	0.118475	0.147188	0.0794703
	122.501	-0.0127561	0.0506152	-0.0839002	0.0215403	0.137446	0.197573	0.0561774	0.127818	0.14334	0.0812327
	123.036	-0.0183014	0.0355128	-0.0888792	0.0237708	0.139291	0.20146	0.0623749	0.131861	0.129909	0.0755328
	123.571	-0.0241758	0.0253221	-0.0978606	0.0186423	0.142707	0.202372	0.066004	0.130664	0.124947	0.0749602
	124.106	-0.0251142	0.0173184	-0.10993	0.0151613	0.143663	0.209883	0.0660963	0.127827	0.122867	0.0733479
	124.641	-0.0157177	0.0171537	-0.122006	0.010922	0.144986	0.215791	0.0650125	0.126114	0.121969	0.0679029
	125.176	-0.00438899	0.0249805	-0.11338	0.0108997	0.140542	0.219265	0.067709	0.122651	0.122022	0.0638982
	125.71	0.00988132	0.101489	-0.107154	0.0153133	0.132634	0.215474	0.0697468	0.123853	0.124839	0.0580725
	126.245	0.0133133	0.0995707	-0.114488	0.0167622	0.124321	0.204227	0.0642153	0.119834	0.12794	0.0546053
	126.78	0.0158968	0.0984197	-0.130519	0.0191415	0.129971	0.191954	0.0557046	0.112121	0.11775	0.0539753
	127.315	0.0117	0.0984451	-0.136809	0.0234466	0.132237	0.190895	0.0510883	0.111626	0.112985	0.0536662
	127.85	0.00645857	0.0986005	-0.128762	0.0254802	0.132129	0.19636	0.04845	0.10963	0.11173	0.0536218
	128.385	0.00886834	0.102187	-0.120859	0.0256967	0.138152	0.200831	0.0526354	0.102723	0.11634	0.0541705
	128.92	0.0146523	0.0984991	-0.111457	0.0227881	0.142765	0.212777	0.0557268	0.0971192	0.122356	0.0501419
	129.455	0.017112	0.096789	-0.110096	0.0188789	0.14341	0.228696	0.0544677	0.0919758	0.129839	0.0446136
	129.99	0.0184091	0.0960017	-0.111451	0.0151952	0.141103	0.239226	0.052656	0.0908047	0.136313	0.0466129
	130.525	0.0233809	0.102847	-0.110725	0.0164966	0.138541	0.247082	0.0542134	0.0918514	0.133057	0.0431034
	131.06	0.0264694	0.110699	-0.0965038	0.0215861	0.131635	0.253375	0.048394	0.091931	0.12114	0.0376994
	131.595	0.0287195	0.115449	-0.0953681	0.0223196	0.124287	0.263448	0.0456789	0.0884791	0.108888	0.0359022
	132.13	0.0302688	0.119682	-0.0968351	0.0222387	0.12025	0.271403	0.0455715	0.0905223	0.0996017	0.0411794
	132.665	0.0298508	0.120219	-0.0942913	0.0197905	0.122746	0.261472	0.0451924	0.0937149	0.0937356	0.0449787
	133.2	0.0336944	0.112468	-0.102008	0.0108126	0.137172	0.253157	0.045441	0.0903781	0.0833983	0.0452603
	133.735	0.0382163	0.106216	-0.108852	-0.00732049	0.160059	0.245593	0.0412492	0.0889658	0.0796526	0.0441762
	134.269	0.043718	0.10568	-0.112287	-0.0261337	0.171174	0.256293	0.0367564	0.0889971	0.081618	0.0444102
	134.804	0.0403574	0.100442	-0.120469	-0.0354517	0.166986	0.26205	0.0304511	0.0883998	0.0811826	0.0434186
	135.339	0.0336917	0.0844645	-0.1175	-0.0371838	0.163535	0.266476	0.0239975	0.0871585	0.0761367	0.0437401
	135.874	0.0320599	0.0772944	-0.111421	-0.0419361	0.162567	0.262865	0.0195463	0.0819504	0.0716414	0.0452633
	136.409	0.0281933	0.079172	-0.107343	-0.0571208	0.162785	0.261316	0.0172562	0.0761395	0.0724754	0.0477566
	136.944	0.017831	0.0712462	-0.0917663	-0.0674693	0.176773	0.254007	0.0207639	0.0702022	0.0811804	0.0501854
	137.479	0.0130645	0.0594297	-0.0817029	-0.0691922	0.182213	0.247244	0.0242761	0.0620925	0.0882042	0.0475602
	138.014	0.00919569	0.0416013	-0.0879466	-0.0679737	0.163229	0.247666	0.0219137	0.0599401	0.0861965	0.050022
	138.549	-0.00155803	0.0269541	-0.0978692	-0.0594196	0.156206	0.241892	0.0189726	0.0621727	0.0855999	0.0516076
	139.084	-0.00760351	0.0220551	-0.112924	-0.0459173	0.152334	0.228831	0.0269549	0.0602516	0.0889498	0.0542846
	139.619	-0.0154317	0.0274538	-0.113034	-0.0434604	0.155728	0.225722	0.0321245	0.0609717	0.0920196	0.0573166
	140.154	-0.0232287	0.0291866	-0.115526	-0.0392114	0.160794	0.221651	0.0347074	0.0623019	0.0919955	0.0527245
	140.689	-0.024535	0.0220592	-0.113094	-0.0363835	0.160139	0.207547	0.0340121	0.0679346	0.0904863	0.0484539
	141.224	-0.026088	0.0138137	-0.109234	-0.0435997	0.154727	0.197976	0.0243919	0.0734503	0.0867067	0.0474129
	141.759	-0.0228945	0.0145269	-0.10318	-0.0446663	0.149018	0.193774	0.0220937	0.0792951	0.0908779	0.0483426
	142.294	-0.0183461	0.0154979	-0.0987323	-0.0518451	0.142914	0.195561	0.0272997	0.0943442	0.0928078	0.0496691
	142.828	-0.0179558	0.026424	-0.0987092	-0.0483822	0.139702	0.18832	0.0346525	0.103056	0.0993297	0.0538695
	143.363	-0.020557	0.0411172	-0.104638	-0.0512023	0.134145	0.171787	0.0388103	0.11192	0.10301	0.0547337
	143.898	-0.0156555	0.0447903	-0.107376	-0.0414992	0.131533	0.162117	0.045406	0.11253	0.0959925	0.0499282
	144.433	-0.0119051	0.0560445	-0.109239	-0.0433576	0.113167	0.154269	0.0480033	0.1138	0.0889826	0.0476922
	144.968	-0.0111053	0.0644651	-0.101088	-0.048155	0.0976867	0.147515	0.0504395	0.115048	0.0907741	0.0505675
	145.503	-0.00818561	0.0729651	-0.109126	-0.052357	0.0957041	0.142411	0.0493033	0.117233	0.0896662	0.0516355
	146.038	-0.00597091	0.0734871	-0.101816	0.0113628	0.0979489	0.141755	0.0518313	0.124671	0.0874203	0.0492976
	146.573	-0.0115827	0.0701406	-0.0916596	0.0146233	0.0973915	0.142062	0.0587999	0.134852	0.0837629	0.0426637
	147.108	-0.0156189	0.0607804	-0.0815131	0.0187719	0.102027	0.141068	0.0656735	0.139096	0.0834118	0.0390457
	147.643	-0.0208974	0.0599629	-0.0808877	0.0193091	0.115081	0.140536	0.0658393	0.13346	0.0785266	0.0453518
	148.178	-0.0269342	0.0633381	-0.0858606	0.0189423	0.116795	0.142226	0.0635586	0.12872	0.0794088	0.0507783
	148.713	-0.031163	0.0596078	-0.0879869	0.0170801	0.113924	0.146535	0.0647875	0.120379	0.0825165	0.0520868
	149.248	-0.0378353	0.0507532	-0.0860073	0.00920496	0.111057	0.157089	0.0656969	0.110116	0.0841203	0.0532327
	149.783	-0.04427	0.0524587	-0.0886011	0.00504455	0.104847	0.172978	0.0658646	0.106666	0.0875353	0.0473426
	150.318	-0.0519396	0.0575457	-0.0926445	0.00106206	0.0973485	0.185671	0.0667037	0.108141	0.0834087	0.0429147
	150.853	-0.0530272	0.0598429	-0.0819558	-0.00099508	0.111153	0.187681	0.0672199	0.108043	0.0786785	0.0442325
	151.387	-0.0541763	0.0621766	-0.0657735	0.000283036	0.122862	0.192455	0.0736802	0.110905	0.0830016	0.0478068
	151.922	-0.062091	0.0688097	-0.0571526	0.00691407	0.124294	0.190781	0.0777708	0.111503	0.0906558	0.0517769
	152.457	-0.0636887	0.0755111	-0.04455	0.0169666	0.122353	0.185483	0.0745509	0.10796	0.0893459	0.0573731
	152.992	-0.0586776	0.0853474	-0.0423385	0.0245649	0.11662	0.188248	0.0709003	0.101821	0.0876337	0.0570396
	153.527	-0.0616264	0.0913456	-0.0431948	0.0235961	0.125364	0.203141	0.0676522	0.0937448	0.0837619	0.0609907
	154.062	-0.0649186	0.0937189	-0.0452922	0.0177664	0.149118	0.213413	0.0654553	0.0844488	0.0823339	0.0643159
	154.597	-0.0609406	0.0924714	-0.0510857	0.00916699	0.168492	0.216866	0.0637235	0.0789761	0.0776783	0.064849
	155.132	-0.0522645	0.0906717	-0.0516788	0.0142381	0.179164	0.22328	0.0638308	0.0711496	0.0725116	0.0600198
	155.667	-0.0478716	0.0874349	-0.0446669	0.020338	0.184366	0.228875	0.060173	0.0626315	0.0634239	0.0578427
	156.202	-0.0433996	0.0832111	-0.0419426	0.0220254	0.194418	0.235367	0.0624154	0.0569298	0.0589928	0.0610298
	156.737	-0.039726	0.0778079	-0.0497073	0.0222399	0.216591	0.232471	0.0658622	0.0465056	0.0583849	0.0621242
	157.272	-0.0327721	0.0837872	-0.0538283	0.0153134	0.241757	0.222191	0.0642933	0.0383463	0.0687772	0.0596289
	157.807	-0.0240573	0.0831334	-0.0477711	0.0130054	0.259166	0.214532	0.0614735	0.0343571	0.0698069	0.0544558
	158.342	-0.0208725	0.0776642	-0.0471054	0.018794	0.24799	0.210991	0.0638308	0.0336132	0.074937	0.0498821
	158.877	-0.0188701	0.0831937	-0.0494117	0.0121911	0.214917	0.209985	0.0715112	0.0339032	0.0726417	0.0472408
	159.412	-0.0190636	0.0887909	-0.0525071	0.00391135	0.199239	0.213471	0.0753848	0.0320393	0.0685048	0.0443711
	159.947	-0.0197115	0.092305	-0.0578872	-0.00125881	0.192036	0.214369	0.0766458	0.0368532	0.0617841	0.042347
	160.481	-0.0197417	0.0937762	-0.0647393	-0.00266517	0.197025	0.211535	0.0741316	0.0413565	0.0578458	0.0420389
	161.016	-0.0180903	0.0896429	-0.0607058	-0.000261724	0.192401	0.213151	0.0725934	0.0439093	0.0597161	0.0524499
	161.551	-0.0151426	0.0923138	-0.0590806	-5.57651e-05	0.1863	0.217111	0.0677857	0.0447908	0.0630069	0.0567463
	162.086	-0.0228115	0.0891411	-0.0530507	0.000737423	0.178934	0.215905	0.064531	0.0470873	0.0674684	0.0570012
	162.621	-0.0377197	0.0862839	-0.0488258	0.00120102	0.161457	0.215236	0.064257	0.0548306	0.0731284	0.055551
	163.156	-0.0497076	0.0875479	-0.0475852	-0.000735882	0.155848	0.212592	0.0642355	0.0631297	0.0735257	0.0529222
	163.691	-0.0527232	0.0857304	-0.0569495	0.000237755	0.15855	0.208209	0.0606038	0.0701653	0.0732692	0.0498947
	164.226	-0.0476084	0.0879413	-0.0545556	-0.000984119	0.157784	0.2095	0.0540448	0.0750995	0.0757787	0.0488554
	164.761	-0.0434403	0.0902018	-0.0599864	-0.00435143	0.160599	0.215881	0.0508606	0.0777146	0.0767565	0.0502807
	165.296	-0.0371224	0.0941894	-0.0564895	-0.00104188	0.146937	0.384332	0.0570893	0.0815262	0.0755615	0.0501311
	165.831	-0.0438402	0.0925268	-0.0647956	0.00396476	0.139731	0.361595	0.0617708	0.082467	0.0786823	0.0528727
	166.366	-0.0467742	0.0944315	-0.0716507	0.0153684	0.131415	0.335194	0.0632323	0.0767513	0.081868	0.0595017
	166.901	-0.0535288	0.0914267	-0.0622272	0.0262766	0.128447	0.319366	0.0592669	0.0700718	0.0721445	0.0647015
	167.436	-0.064275	0.0850082	-0.0591734	0.0237435	0.118373	0.295045	0.0566219	0.0713245	0.0593405	0.0681911
	167.971	-0.0700117	0.0756075	-0.0592221	0.0242224	0.111154	0.261842	0.0554826	0.0770858	0.0506892	0.0729879
	168.506	-0.0700453	0.0674889	-0.0553085	0.0293847	0.111558	0.241371	0.0534007	0.0770415	0.0508169	0.0771615
	169.04	-0.06943	0.0696822	-0.0641477	0.0303156	0.101088	0.2389	0.0504621	0.0706505	0.0521651	0.0808308
	169.575	-0.0701712	0.0739999	-0.0697889	0.0332607	0.0972801	0.236413	0.0484849	0.0669357	0.0486973	0.0824206
	170.11	-0.0673771	0.0847189	-0.0670323	0.040054	0.101766	0.229081	0.0470428	0.0616057	0.0443779	0.0821277
	170.645	-0.0639334	0.0927981	-0.0670715	0.0511564	0.10472	0.219997	0.0474166	0.0631173	0.0411636	0.0760505
	171.18	-0.0580454	0.0925281	-0.0684812	0.057285	0.094476	0.217745	0.0503968	0.0676025	0.041223	0.073178
	171.715	-0.053099	0.0966765	-0.0634945	0.0533143	0.092607	0.21585	0.0516616	0.0628925	0.0503836	0.0742037
	172.25	-0.0496391	0.105821	-0.0579253	0.0540296	0.0900122	0.213687	0.0531856	0.0545117	0.0536494	0.0764441
	172.785	-0.0488129	0.1086	-0.0549542	0.0551642	0.0938988	0.220931	0.0509067	0.0502204	0.0512374	0.0754503
	173.32	-0.0475427	0.0997896	-0.0522745	0.0480623	0.0973133	0.228311	0.0467558	0.0552367	0.0487242	0.0746215
	173.855	-0.0417716	0.0942426	-0.0568401	0.0420042	0.101023	0.234152	0.0451306	0.0594127	0.0497637	0.0770024
	174.39	-0.0384369	0.0829903	-0.0689339	0.0433957	0.105053	0.238489	0.0443925	0.0590461	0.0528134	0.077317
	174.925	-0.0328057	0.0771347	-0.0676629	0.0418772	0.0963555	0.244705	0.0356605	0.063512	0.0491111	0.0759524
	175.46	-0.0305821	0.0698489	-0.0633127	0.0361129	0.0860286	0.250593	0.030865	0.0670767	0.0484527	0.0737611
	175.995	-0.0275861	0.0720989	-0.0677526	0.0323366	0.0907567	0.251139	0.0272856	0.0657705	0.0584842	0.0714466
	176.53	-0.0249149	0.0652979	-0.0667917	0.0312752	0.107076	0.25706	0.0261509	0.0596553	0.069163	0.0711575
	177.065	-0.0279228	0.0544182	-0.0640086	0.0374461	0.127829	0.258531	0.0309848	0.0599386	0.0726106	0.0718851
	177.599	-0.0357487	0.0556669	-0.0637182	0.0430155	0.144554	0.244763	0.0319509	0.0677941	0.0784084	0.0747403
	178.134	-0.0429318	0.0484937	-0.0603874	0.0501371	0.151567	0.237654	0.0305996	0.0732879	0.0820588	0.0785194
	178.669	-0.041253	0.04573	-0.0624409	0.0483237	0.162853	0.233334	0.0320687	0.0732232	0.0813454	0.0782119
	179.204	-0.0329522	0.0444742	-0.064233	0.0406756	0.175796	0.23043	0.0316491	0.0682689	0.0803783	0.072528
	179.739	-0.0357411	0.0460356	-0.066922	0.0235773	0.180131	0.23713	0.0293122	0.0630529	0.0788665	0.0691964
	180.274	-0.039414	0.0478775	-0.065681	0.0163777	0.147293	0.229894	0.019995	0.05638	0.07108	0.0703478
	180.809	-0.0419573	0.052657	-0.0682464	0.0154297	0.149947	0.216731	0.0143934	0.048183	0.0635463	0.0707783
	181.344	-0.0357876	0.0549478	-0.0692438	0.0124742	0.156041	0.199425	0.01217	0.0454773	0.0632389	0.0719787
	181.879	-0.0276224	0.0578542	-0.0668501	0.0129014	0.164111	0.177793	0.0132288	0.0387598	0.061455	0.0758419
	182.414	-0.0306039	0.0592553	-0.0586453	0.0128596	0.161655	0.166851	0.0170988	0.038666	0.059535	0.0730935
	182.949	-0.0340827	0.0631332	-0.0492186	0.0235961	0.160684	0.168588	0.0195681	0.038188	0.0600476	0.0657076
	183.484	-0.0342288	0.0676956	-0.0422845	0.0338874	0.160058	0.155891	0.0272942	0.0453184	0.0576636	0.0599496
	184.019	-0.0435054	0.0660002	-0.0416008	0.0400429	0.159182	0.1448	0.0349873	0.0472283	0.053749	0.0588956
	184.554	-0.0490189	0.057184	-0.0394225	0.0384083	0.177742	0.139976	0.039624	0.0417135	0.0511172	0.0627899
	185.089	-0.0529279	0.050812	-0.0377687	0.0276205	0.209107	0.138932	0.0420433	0.0420432	0.0444759	0.0659725
	185.624	-0.0585537	0.0445859	-0.0357361	0.0336854	0.231975	0.134654	0.0462414	0.0478687	0.0381	0.0681385
	186.158	-0.0576979	0.0462098	-0.0349826	0.0465148	0.248329	0.140918	0.0454875	0.0484596	0.0354343	0.0694993
	186.693	-0.0476955	0.051099	-0.0325205	0.057476	0.234223	0.147216	0.041409	0.0461057	0.0308841	0.0729177
	187.228	-0.0416596	0.0484134	-0.0344366	0.0629131	0.218659	0.151898	0.0368032	0.048208	0.0314242	0.0764464
	187.763	-0.0370092	0.0486821	-0.0373178	0.0635749	0.195672	0.169764	0.0370274	0.0543439	0.0318214	0.0796434
	188.298	-0.0254618	0.0446891	-0.0438166	0.0633038	0.177153	0.185143	0.0355022	0.0521006	0.03376	0.0853951
	188.833	-0.0136279	0.0468697	-0.0417809	0.0646601	0.161708	0.20091	0.0376672	0.0557234	0.0430838	0.089665
	189.368	-0.00946422	0.048711	-0.0468426	0.0513412	0.148411	0.213738	0.042524	0.0625667	0.0466004	0.0933543
	189.903	0.00340966	0.0625694	-0.0527204	0.0435595	0.149843	0.21491	0.0460433	0.0602393	0.0466884	0.0933671
	190.438	0.0101423	0.0717394	-0.0655335	0.0411806	0.156504	0.218878	0.0449228	0.0556268	0.045947	0.0925659
	190.973	0.0126549	0.0712823	-0.0728049	0.0365825	0.16975	0.235583	0.0417524	0.0525808	0.0491214	0.0883654
	191.508	0.0124261	0.0646046	-0.0729153	0.0314802	0.188053	0.256457	0.0416027	0.0498169	0.0483552	0.0901322
	192.043	0.00186907	0.0556127	-0.067456	0.0244571	0.194182	0.275171	0.0393876	0.0446343	0.0464366	0.095384
	192.578	-0.00572636	0.0589185	-0.0656225	0.0181009	0.176063	0.286751	0.0377603	0.0467319	0.0398748	0.100748
	193.113	-0.00213867	0.059997	-0.0650112	0.012829	0.158241	0.279947	0.0379712	0.0412274	0.0349755	0.102283
	193.648	0.000417758	0.0652582	-0.0662366	0.0137495	0.139506	0.282747	0.0446443	0.0370047	0.0322731	0.0963667
	194.183	0.000279512	0.0666976	-0.0722464	0.0242401	0.132302	0.294291	0.0524946	0.036795	0.0318925	0.0890151
	194.717	0.00220132	0.0604853	-0.0703599	0.0252561	0.133627	0.297607	0.05841	0.0366942	0.032137	0.084708
	195.252	0.100205	0.0496659	-0.0754931	0.020488	0.123842	0.29471	0.0537869	0.0362913	0.029734	0.0856028
	195.787	0.103435	0.0375902	-0.0813956	0.0134357	0.117153	0.308836	0.0517063	0.0360828	0.0271494	0.0902209
	196.322	0.100861	0.0301067	-0.0853777	0.0136364	0.113204	0.320881	0.0494537	0.0342272	0.0240786	0.097073
	196.857	0.100848	0.0235097	-0.0815989	0.0233181	0.112726	0.31743	0.0439256	0.0371723	0.0262837	0.102183
	197.392	0.0994286	0.0251709	-0.0819339	0.0301545	0.108928	0.3024	0.0414238	0.0413631	0.0261564	0.103802
	197.927	0.0848719	0.0219825	-0.0836712	0.0315315	0.108217	0.300349	0.0411015	0.0473912	0.0194435	0.10309
	198.462	0.0679542	0.028452	-0.0867593	0.0334881	0.108015	0.309289	0.0308425	0.0480573	0.014834	0.0972239
	198.997	0.0601584	0.0356754	-0.0921272	0.0417243	0.114213	0.308154	0.0242975	0.0490579	0.0179719	0.0951778
	199.532	0.0621969	0.047029	-0.0975217	0.0477233	0.127673	0.302074	0.0187486	0.0559716	0.0239403	0.0947175
	200.067	0.0607397	0.0615767	-0.108692	0.0598404	0.147244	0.291053	0.0147098	0.0611084	0.0250698	0.0941501

[truncated: 5 more sheets: WT+acvr1bb MO dorsal, WT+acvr1bb MO+1ba mRNA lateral, WT+acvr1bb MO+1ba mRNA dorsal, WT+acvr1bb MO+1bb mRNA lateral, WT+acvr1bb MO+1bb mRNA dorsal]
