# Supplementary material for: Regulation of Nodal signaling propagation by receptor interactions and positive feedback
Source: eLife. 2022 Sep 23;11:e66397. doi: 10.7554/eLife.66397 (PMC9612913; doi:10.7554/eLife.66397)
Supplement: Figure 4—source data 1. [file elife-66397-fig4-data1.xlsx]

## Sheet: Figure 4
	Figure 4B
		Number of pSmad2/3-positive nuclei tiers from the YSL
	Embryo	Wild type	acvr1b-a-/-	Wild type acvr1b-b MO-1	acvr1b-a-/- acvr1b-b MO-1	Wild type acvr1b-b MO-1 acvr1b-a mRNA	acvr1b-a-/- acvr1b-b MO-1 acvr1b-a mRNA	Wild type acvr1b-b MO-1 acvr1b-b mRNA	acvr1b-a-/- acvr1b-b MO-1 acvr1b-b mRNA
	1	17	13	20	0	8	13	10	11
	2	13	15	18	0	9	12	11	10
	3	14	9	21	0	8	13	12	10
	4	12	11	17	0	9	20	10	12
	5	5	13	21	17	9	13	8	8
	6	15	14	9	16	11	9	14	9
	7	14	11	11	0	10	12	11	9
	8	17	16	12	0	12	12	8	13
	9	10	15	14	14	13	15	11	11
	10	13	20	10	11	15	15	15	12
	11	20	10	8	0	11	10	10	8
	12	9	13	9	0	9	12	12	10
	13	18	13	15	19	12	22	10	14
	14	13	8	11	0	25	15	14	12
	15	18	8	9	0	18	15	14	11
	16	9	13	12	0	18	20	12	13
	17	14	8	13	0	12	17	13	14
	18	14	9	14	0	22	11	12	20
	19	18	10	10	0	13	18	22	9
	20	10	12	10	0	19	17	10
	21	11	8	14	0	16	23
	22	11	11	8	0	14	21
	23	11	12	11	0
	24	16	12	11	0
	25	10		10	0
	26	11			0
	27	7
	28	13
	29	14
	Figure 4C, acvr1b-a-/- embryos
				Phenotype
	Condition	Morpholino (mg/ml)	mRNA (pg)	Wild type	Delayed development	Head malformation	Head + tail malformation	Tail malformation	Pinhead, normal tail	Pinhead, tail malformation	Nodal loss-of-function	Nodal gain-of-function	Dead
	Uninjected	0	0	35	0	0	2	1	0	0	0	0	8
	acvr1b-b MO-1	0.4	0	0	0	0	0	0	0	0	5	0
	acvr1b-b MO-1 + acvr1b-b mRNA	0.4	10	0	0	2	2	0	0	0	1	0	4
	acvr1b-b MO-1 + acvr1b-b mRNA	0.4	25	3	0	0	1	0	0	0	0	0	6
	acvr1b-b MO-1 + acvr1b-b mRNA	0.4	50	0	2	0	2	0	0	0	0	1	2
	acvr1b-b MO-1 + acvr1b-b mRNA	0.4	100	1	0	2	5	0	0	0	0	0	1
	acvr1b-b MO-1 + acvr1b-a mRNA	0.4	10	3	0	0	0	2	3	3	0	0	3
	acvr1b-b MO-1 + acvr1b-a mRNA	0.4	50	2	0	0	0	0	0	0	0	0	11
	acvr1b-b MO-1 + acvr1b-a mRNA	0.4	100	0	0	0	0	0	0	0	0	2	0
