# Supplementary material for: Regulation of Nodal signaling propagation by receptor interactions and positive feedback
Source: eLife. 2022 Sep 23;11:e66397. doi: 10.7554/eLife.66397 (PMC9612913; doi:10.7554/eLife.66397)
Supplement: Figure 5—figure supplement 1—source data 1. [file elife-66397-fig5-figsupp1-data1.xlsx]

## Sheet: Figure 5 - figure supplement 1C
	Figure 5 - figure supplement 1C
	Squint-GFP
		Background-subtracted and normalized intensity in wild-type embryos
	Distance from the YSL (µm)	1	2	3	4	5	6	7	8	9	10	11	12	13	14	15	16	17	18	19	20	21	22	23	24	25	26	27	28	29
	0	1	1	1	1	1	1	1	1	1	1	1	1	1	1	1	1	1	1	1	1	1	1	1	1	1	1	1	1	1
	0.326	1.01623	0.884836	1.02652	1.05246	1.03197	1.09413	1.04962	0.959377	0.942919	0.977127	1.03169	0.997118	0.960503	1.01784	1.00995	0.996502	1.04696	1.0026	1.02558	1.24678	0.980372	0.992121	1.00273	1.01567	1.00305	0.995329	1.03729	0.989002	1.1681
	0.653	1.1163	0.791169	1.03289	1.16668	1.03387	1.08415	1.19114	0.92236	0.962851	1.04121	1.05823	0.982737	0.939415	0.97477	0.973675	0.962564	1.10694	0.9852	1.09528	1.28685	0.979351	0.981154	0.985478	1.00924	0.960742	1.01156	1.01927	0.987409	1.24012
	0.979	1.16014	0.702852	1.01469	1.04549	1.02677	1.07943	1.4188	0.90298	0.959478	1.03632	1.06601	0.982775	0.927439	0.968146	0.992335	0.962306	1.16906	0.94466	1.12487	1.27378	0.958725	0.959181	0.988201	1.01645	0.908036	1.02611	1.06006	0.991296	1.33226
	1.305	1.06136	0.617917	0.955082	0.874084	1.01664	1.1973	1.57939	0.854816	0.948642	0.988005	1.06826	0.982067	0.916781	0.993581	0.996733	0.92855	1.16893	0.938289	1.12119	1.54825	0.943253	0.954987	0.980526	1.04427	0.861587	1.06618	1.18664	0.993134	1.41805
	1.632	1.1413	0.558585	0.937989	0.622868	1.01137	1.20347	1.57428	0.83772	0.936276	0.969179	1.04	0.976363	0.908504	1.01459	0.984237	0.898465	1.22337	0.935473	1.11512	1.48916	0.912701	0.92466	0.936126	1.07893	0.854501	1.08213	1.28313	0.998935	1.59247
	1.958	1.06011	0.514711	0.938329	0.529153	0.993526	1.13551	1.63382	0.82548	0.835731	1.0257	1.04542	0.970969	0.8927	1.02778	1.0063	0.888685	1.22375	0.902144	1.11106	1.3035	0.891184	0.875952	0.919706	1.14737	0.850047	1.12606	0.937822	0.991231	1.78294
	2.284	1.043	0.47726	1.01963	0.14105	0.981708	1.05011	1.63386	0.796544	0.905506	1.07209	1.04823	0.961943	0.890002	1.0389	1.02371	0.9197	1.31448	0.896821	1.10584	1.3821	0.900828	0.858219	0.906783	1.21281	0.845422	1.1149	0.720813	0.984744	1.7231
	2.61	1.06706	0.444027	1.15238	0.222101	0.966731	0.968485	1.63882	0.77325	0.895776	1.09852	1.05976	0.951894	0.883206	1.05761	0.976295	0.92182	1.3748	0.88827	1.0854	1.29993	0.896918	0.866261	0.886411	1.19307	0.817194	1.05963	0.73893	0.987384	1.58585
	2.937	1.0538	0.412998	1.24335	0.483324	0.952563	0.915936	1.8483	0.756101	0.845774	1.13133	1.10213	0.948554	0.882621	1.04022	0.956961	0.957953	1.40179	0.88476	1.04633	1.15713	0.887409	0.861593	0.869072	1.18954	0.79205	1.00355	0.848462	0.97904	1.5826
	3.263	1.09354	0.382845	1.17627	0.704536	0.943987	0.867717	1.89507	0.722915	0.709645	1.1954	1.13377	0.941826	0.89262	1.03818	0.951269	1.02797	1.51422	0.880181	1.00057	1.19848	0.886229	0.841551	0.851727	1.21047	0.758365	0.974371	1.04449	0.977908	1.64999
	3.589	1.09583	0.361362	1.14576	0.91798	0.933006	0.832013	1.8096	0.704416	0.601578	1.3095	1.19373	0.93594	0.89784	1.04341	0.928481	1.06431	1.48514	0.863614	0.961472	1.3526	0.88415	0.825529	0.832077	1.21703	0.732758	0.949328	1.24301	0.969595	1.77146
	3.916	1.11313	0.358524	1.11842	1.08591	0.933177	0.823778	1.69256	0.688051	0.601964	1.2711	1.23076	0.929226	0.908833	1.06716	0.924977	1.10163	1.50207	0.88746	0.938216	1.48809	0.854608	0.805629	0.809018	1.21111	0.695972	0.94838	1.48685	0.964937	1.90131
	4.242	1.10013	0.344283	1.1202	1.10208	0.928704	0.863732	1.6297	0.671665	0.554461	1.23688	1.28337	0.923795	0.904748	1.10707	0.914651	1.1119	1.55853	0.888687	0.921978	1.61017	0.835164	0.776012	0.805204	1.23012	0.655671	0.906665	1.64451	0.960317	1.97898
	4.568	1.08606	0.337403	1.13564	1.07	0.919112	0.91129	1.52975	0.651649	0.558024	1.1901	1.30345	0.919349	0.895804	1.13993	0.943857	1.13216	1.54229	0.885324	0.913906	2.02849	0.833313	0.752422	0.811652	1.29697	0.648248	0.879194	1.83807	0.950863	2.05094
	4.895	1.01947	0.336561	1.18585	1.04602	0.89453	0.860163	1.43837	0.631831	0.624861	1.18401	1.26306	0.919989	0.88729	1.19753	0.956441	1.12029	1.52036	0.952398	0.892463	2.26827	0.820311	0.745182	0.808958	1.37976	0.680773	0.860859	1.91337	0.935739	2.06994
	5.221	0.961118	0.342168	1.23859	1.02659	0.884291	0.908428	1.31736	0.617735	0.654091	1.20324	1.22126	0.924754	0.881448	1.1986	0.969873	1.0843	1.53669	0.995529	0.864075	2.28266	0.822704	0.74911	0.796332	1.41687	0.693949	0.857281	2.02076	0.921894	2.08621
	5.547	0.962316	0.347441	1.22435	1.04942	0.883448	0.927132	1.25431	0.60792	0.683687	1.16563	1.20374	0.92834	0.881504	1.19584	0.997509	1.05354	1.5319	0.999161	0.87078	2.35837	0.816021	0.721307	0.818192	1.43902	0.692046	0.857792	2.06006	0.895811	2.09223
	5.874	0.955184	0.365257	1.18637	1.03485	0.871022	0.860682	1.2419	0.589508	0.782774	1.11519	1.21531	0.925206	0.871721	1.21686	1.02294	1.03391	1.55476	1.00965	0.886245	2.39799	0.811266	0.70774	0.834145	1.44367	0.705641	0.878365	2.0812	0.878275	2.10063
	6.2	0.978127	0.376415	1.13413	1.0772	0.860456	0.803178	1.27262	0.578698	0.873678	1.02607	1.20449	0.914814	0.866073	1.21973	1.013	1.0138	1.62518	1.09836	0.871723	2.38503	0.818396	0.705144	0.865844	1.44468	0.721381	0.860957	2.03254	0.866046	2.10332
	6.526	0.990773	0.389944	1.0347	1.09083	0.843938	0.770103	1.2234	0.568272	0.882037	0.957382	1.18704	0.907164	0.861926	1.21616	0.975615	0.989139	1.75209	1.1296	0.837412	2.4699	0.825688	0.698116	0.894788	1.43139	0.738098	0.845093	1.98092	0.857897	2.10312
	6.853	1.02109	0.402246	0.945159	1.10088	0.840309	0.748564	1.16012	0.560854	0.857739	0.898721	1.129	0.896128	0.854099	1.20108	0.959049	0.954645	1.80994	1.14332	0.821716	2.49142	0.84268	0.699099	0.924029	1.41633	0.720511	0.845994	1.93649	0.847443	2.10321
	7.179	1.04332	0.406132	0.898984	1.14025	0.835048	0.755937	1.09227	0.565256	0.848777	0.877301	1.10315	0.880888	0.841434	1.18902	0.93912	0.92839	1.82604	1.12366	0.798716	2.43211	0.824913	0.705218	0.939947	1.43324	0.686856	0.84132	1.89613	0.844475	2.12258
	7.505	1.11905	0.409591	0.837593	1.17973	0.830598	0.764208	1.05718	0.568034	0.906771	0.869059	1.10133	0.866099	0.830652	1.13415	0.945566	0.896425	1.84023	1.07033	0.797157	2.43477	0.828203	0.706171	0.950057	1.48581	0.674488	0.836423	1.84577	0.840371	2.18454
	7.831	1.14957	0.408753	0.801875	1.19148	0.829601	0.748362	1.04924	0.546454	0.961964	0.851674	1.14124	0.849796	0.819236	1.08838	0.963611	0.860383	1.90505	1.01834	0.766853	2.43285	0.826165	0.71462	0.938065	1.55315	0.686747	0.823656	1.80448	0.835115	2.19081
	8.158	1.19994	0.444177	0.758476	1.23254	0.836078	0.723181	1.03272	0.514907	0.936084	0.835745	1.18595	0.832209	0.80679	1.065	0.94738	0.830088	1.98624	0.894225	0.727356	2.36819	0.81785	0.746407	0.935417	1.47064	0.748404	0.800257	1.73154	0.826477	2.24673
	8.484	1.22557	0.477179	0.722104	1.29117	0.838684	0.712692	1.00414	0.495498	0.911343	0.853401	1.16979	0.816448	0.80245	1.08108	0.957276	0.816116	2.09067	0.785677	0.718315	2.32496	0.821858	0.75948	0.936478	1.35627	0.742419	0.793696	1.70137	0.822891	2.29793
	8.81	1.25113	0.511361	0.715555	1.31695	0.850002	0.70506	0.969445	0.472041	0.907772	0.896983	1.1346	0.803664	0.798552	1.08149	0.984626	0.806965	2.13978	0.739962	0.690761	2.26955	0.84381	0.775837	0.936346	1.25922	0.726915	0.788423	1.62511	0.815084	2.30898
	9.137	1.22274	0.555407	0.708592	1.32922	0.850239	0.699534	0.953146	0.449514	0.884914	0.953303	1.10849	0.787151	0.789729	1.08804	0.989267	0.808361	2.18622	0.692009	0.678141	2.28612	0.842448	0.796052	0.938153	1.17459	0.70106	0.784919	1.58075	0.818961	2.33132
	9.463	1.24091	0.551904	0.719673	1.37311	0.856603	0.697291	0.944893	0.435601	0.865865	1.02584	1.09636	0.778165	0.78233	1.0965	1.01626	0.797976	2.24442	0.660381	0.648511	2.26024	0.867541	0.80813	0.934092	1.12052	0.669468	0.800443	1.50109	0.823684	2.36779
	9.789	1.31079	0.532698	0.740311	1.48076	0.833775	0.692804	0.937258	0.421472	0.848004	1.11706	1.07531	0.765596	0.780109	1.14575	1.03382	0.799308	2.2906	0.617222	0.637467	2.24718	0.901669	0.813837	0.936401	1.10217	0.629748	0.81822	1.46173	0.828894	2.39207
	10.116	1.39207	0.540127	0.752945	1.53809	0.819634	0.675662	0.930534	0.402549	0.871446	1.01302	1.05668	0.756009	0.786687	1.1729	1.05167	0.79926	2.24291	0.599982	0.635092	2.20306	0.905368	0.826482	0.951815	1.09751	0.597546	0.867879	1.36809	0.834455	2.41614
	10.442	1.3974	0.543504	0.734077	1.61193	0.801438	0.660518	0.912191	0.379649	0.909254	1.01466	1.04318	0.744942	0.787095	1.18603	1.06122	0.801606	2.11249	0.576922	0.612466	2.11389	0.938383	0.825372	0.954062	1.10964	0.573838	0.844776	1.34572	0.83219	2.4139
	10.768	1.35453	0.52994	0.73459	1.59414	0.804775	0.655644	0.885216	0.360523	0.994745	1.09545	1.03314	0.73801	0.779993	1.19071	1.04561	0.805586	1.99252	0.568248	0.613519	2.04876	0.930394	0.82845	0.968071	1.10428	0.553403	0.824228	1.31647	0.829192	2.42096
	11.095	1.43479	0.555681	0.73639	1.59276	0.802436	0.650671	0.860264	0.346183	1.16859	1.07246	1.01178	0.728121	0.782617	1.14491	1.04748	0.801132	1.90789	0.565745	0.603804	2.02737	0.929676	0.826374	0.978372	1.08397	0.534787	0.801975	1.30937	0.831451	2.41553
	11.421	1.50854	0.642071	0.745612	1.58049	0.809874	0.654245	0.856768	0.344286	1.23057	1.04079	0.992738	0.720003	0.787315	1.08252	1.03987	0.800939	1.86517	0.607669	0.590752	1.9641	0.939856	0.804321	0.983355	1.0247	0.522846	0.765531	1.27963	0.824756	2.40793
	11.747	1.47882	0.728835	0.762227	1.60799	0.808681	0.655913	0.848436	0.357853	1.07085	1.00826	0.955398	0.708751	0.783656	1.07459	1.0287	0.821969	1.82273	0.625343	0.595575	1.8991	0.92934	0.779561	0.996103	0.948762	0.517014	0.738788	1.27274	0.825768	2.37899
	12.074	1.4716	0.719483	0.787275	1.59274	0.79951	0.668652	0.836643	0.35673	0.917142	0.982106	0.941017	0.702881	0.783037	1.0634	1.02358	0.847156	1.82471	0.633858	0.580303	1.85372	0.925901	0.752871	0.990908	0.889089	0.506409	0.708192	1.26425	0.833419	2.37695
	12.4	1.49607	0.658875	0.812854	1.5977	0.791179	0.657989	0.8375	0.33774	0.824376	0.965503	0.940246	0.694958	0.782169	1.03544	1.02681	0.863741	1.82691	0.640555	0.571198	1.80997	0.907385	0.732632	0.985017	0.852638	0.497291	0.681021	1.24539	0.846021	2.36445
	12.726	1.50698	0.571419	0.858639	1.65706	0.777958	0.673088	0.828363	0.327713	0.752276	0.896826	0.931639	0.691414	0.786942	1.01577	1.01895	0.882564	1.79629	0.642535	0.569959	1.77234	0.890673	0.714507	0.980681	0.8292	0.487559	0.663647	1.25159	0.857193	2.36526
	13.052	1.45752	0.519932	0.914788	1.67772	0.770642	0.670632	0.829093	0.316863	0.721721	0.812932	0.912607	0.686158	0.785671	1.01919	1.00615	0.931487	1.77273	0.587411	0.561493	1.74686	0.880533	0.695155	0.987363	0.815412	0.471202	0.647537	1.20282	0.878788	2.35966
	13.379	1.45173	0.488143	0.947874	1.69505	0.760627	0.688973	0.825767	0.313519	0.697348	0.737353	0.898998	0.683552	0.791062	1.0308	0.995604	0.963338	1.77115	0.514828	0.572701	1.69285	0.865088	0.674019	0.998136	0.805163	0.460156	0.628986	1.16788	0.899878	2.37026
	13.705	1.39753	0.476604	0.916913	1.68558	0.752421	0.694807	0.818298	0.307773	0.695185	0.678415	0.882155	0.680178	0.794233	1.03381	0.944468	0.951407	1.73263	0.462574	0.541714	1.62434	0.846255	0.6526	1.0079	0.791894	0.447775	0.616744	1.16719	0.919189	2.36978
	14.031	1.32764	0.482397	0.892587	1.72957	0.744587	0.705418	0.807649	0.296328	0.687913	0.664075	0.864981	0.677535	0.793298	1.03145	0.927557	0.95459	1.69992	0.431766	0.535779	1.5796	0.827628	0.622847	1.00786	0.782479	0.437916	0.600138	1.17505	0.939562	2.38096
	14.358	1.37531	0.492581	0.881245	1.74698	0.734933	0.714051	0.800271	0.289167	0.662028	0.690267	0.859996	0.678373	0.796892	1.02303	0.895814	0.938868	1.6772	0.428564	0.531539	1.54331	0.814119	0.598063	1.01843	0.826381	0.431981	0.585532	1.22966	0.953652	2.37231
	14.684	1.30806	0.51444	0.874044	1.80376	0.722474	0.713719	0.787008	0.285402	0.656278	0.717546	0.852361	0.678235	0.793981	1.04024	0.854445	0.917305	1.65905	0.428401	0.51849	1.47209	0.792566	0.577014	1.03825	0.899773	0.42676	0.571688	1.2712	0.960788	2.36392
	15.01	1.32578	0.481318	0.856512	1.8354	0.711847	0.715436	0.776818	0.282506	0.637245	0.851751	0.846511	0.680926	0.795281	1.05515	0.830523	0.906482	1.63695	0.420556	0.504912	1.40314	0.756905	0.561486	1.05732	0.950576	0.422045	0.556694	1.31733	0.962727	2.36742
	15.337	1.33164	0.469258	0.861822	1.9098	0.70232	0.717194	0.763944	0.269836	0.617373	0.751223	0.842876	0.683227	0.790438	1.0866	0.830167	0.898718	1.634	0.40589	0.509892	1.36935	0.73039	0.544048	1.07884	0.945771	0.416613	0.549426	1.36024	0.96499	2.36438
	15.663	1.31732	0.461873	0.873718	1.95972	0.694236	0.731731	0.755156	0.254099	0.614278	0.591033	0.842767	0.684862	0.786577	1.1	0.853929	0.90583	1.62496	0.401785	0.499743	1.30024	0.702769	0.525283	1.10015	0.904896	0.416241	0.54063	1.41903	0.967198	2.3624
	15.989	1.29741	0.468155	0.885771	1.99424	0.689385	0.735317	0.744358	0.244762	0.600614	0.517814	0.846887	0.682929	0.784486	1.10968	0.852489	0.900796	1.58366	0.394215	0.498303	1.24152	0.693352	0.514932	1.11565	0.882649	0.419917	0.530689	1.4371	0.964887	2.35575
	16.316	1.39658	0.498048	0.895239	2.03685	0.684648	0.744899	0.7214	0.236098	0.583069	0.487193	0.856812	0.678553	0.776086	1.06602	0.869427	0.878602	1.56627	0.381391	0.497357	1.18435	0.698353	0.503117	1.10875	0.877566	0.421443	0.523396	1.47836	0.956336	2.39171
	16.642	1.33287	0.528325	0.902678	2.06035	0.684958	0.738646	0.710262	0.231213	0.569117	0.464751	0.874262	0.679434	0.772423	1.01932	0.808096	0.857108	1.55526	0.377773	0.504648	1.13427	0.713099	0.485218	1.09247	0.857839	0.421626	0.515403	1.53409	0.953213	2.42324
	16.968	1.27365	0.54209	0.915034	2.14663	0.682738	0.719489	0.698958	0.229666	0.559861	0.446166	0.887214	0.680897	0.766646	0.995038	0.768434	0.853013	1.56525	0.382206	0.504278	1.07015	0.730209	0.475492	1.07219	0.824626	0.423921	0.504065	1.57254	0.950666	2.48049
	17.295	1.23286	0.49098	0.918136	2.19148	0.676309	0.687102	0.680852	0.225442	0.551408	0.421503	0.89814	0.677781	0.756655	0.964739	0.733333	0.847717	1.5309	0.372262	0.498459	1.01927	0.730891	0.466653	1.04769	0.811891	0.426119	0.482613	1.63694	0.953897	2.56023
	17.621	1.20915	0.4658	0.917691	2.14425	0.673988	0.676011	0.667135	0.222521	0.547978	0.398847	0.90253	0.671988	0.750672	0.91529	0.70941	0.831854	1.50657	0.372723	0.49354	0.967678	0.735355	0.453168	1.01727	0.806617	0.425123	0.469196	1.672	0.949116	2.59662
	17.947	1.14463	0.453963	0.922802	2.09666	0.667482	0.67603	0.65246	0.216239	0.540474	0.382609	0.891464	0.664038	0.737609	0.870666	0.69649	0.815789	1.4823	0.356508	0.492213	0.906032	0.762267	0.444523	0.988447	0.822976	0.426481	0.460469	1.71285	0.950122	2.57901
	18.273	1.04435	0.440618	0.929278	2.01778	0.658492	0.676534	0.639123	0.210046	0.523684	0.37512	0.878911	0.660917	0.735102	0.844851	0.69184	0.79348	1.45344	0.335052	0.492474	0.847348	0.766145	0.440121	0.958536	0.858586	0.428398	0.45687	1.77147	0.958843	2.50794
	18.6	1.10324	0.426569	0.946031	2.05472	0.654608	0.682593	0.635588	0.208975	0.516639	0.358842	0.872304	0.660091	0.725058	0.83133	0.706581	0.785691	1.43472	0.33522	0.482804	0.804147	0.752528	0.429262	0.922412	0.885999	0.426201	0.456134	1.83093	0.967607	2.39324
	18.926	1.1162	0.406823	0.964034	1.97474	0.650474	0.685323	0.629884	0.211076	0.52486	0.338533	0.865779	0.656313	0.718344	0.815947	0.721942	0.781518	1.4166	0.31862	0.478102	0.742728	0.751467	0.418671	0.905332	0.890104	0.423985	0.456803	1.85507	0.979529	2.36152
	19.252	1.1181	0.392605	0.972382	2.02191	0.652388	0.677839	0.624693	0.212438	0.53157	0.312763	0.856538	0.655464	0.709123	0.846946	0.734857	0.764315	1.40889	0.308323	0.471187	0.735652	0.720115	0.411987	0.886352	0.878188	0.424217	0.460079	1.87742	0.994819	2.36378
	19.579	1.16355	0.37376	0.991977	2.06896	0.645535	0.671863	0.612827	0.208742	0.509471	0.288007	0.845775	0.65046	0.696017	0.979423	0.786335	0.750004	1.40122	0.299765	0.460934	0.713838	0.693795	0.409141	0.864822	0.897533	0.42619	0.463944	1.9023	1.01079	2.26486
	19.905	1.19647	0.372492	1.01539	2.1659	0.638609	0.666396	0.607537	0.204059	0.501042	0.272833	0.838694	0.647145	0.692333	1.06123	0.766256	0.737381	1.39524	0.292618	0.448016	0.659799	0.664426	0.396908	0.848113	0.979046	0.428857	0.465103	1.90694	1.01836	2.1197
	20.231	1.20447	0.375333	1.02465	2.13455	0.635427	0.662212	0.601766	0.201146	0.524177	0.26071	0.825228	0.640862	0.69198	0.995095	0.705189	0.748449	1.39426	0.28593	0.437775	0.605643	0.628635	0.388755	0.83955	0.97485	0.428739	0.459095	1.89996	1.02012	2.07563
	20.558	1.21237	0.369959	1.02501	2.17136	0.6284	0.654535	0.600278	0.199819	0.52671	0.239996	0.813209	0.639061	0.689763	0.881175	0.67511	0.772773	1.34872	0.293233	0.433318	0.552081	0.58691	0.380743	0.836367	0.985154	0.429053	0.458438	1.87864	1.02969	2.05969
	20.884	1.23221	0.368042	1.02255	2.18217	0.620978	0.649007	0.596744	0.20344	0.525596	0.224913	0.808045	0.632366	0.684339	0.833006	0.657272	0.806661	1.31603	0.278329	0.42646	0.534454	0.55547	0.3784	0.831012	1.02339	0.429044	0.458078	1.83989	1.02908	2.03758
	21.21	1.20141	0.36624	1.01348	2.19786	0.612912	0.644903	0.596983	0.205913	0.530968	0.204019	0.803802	0.624162	0.681387	0.780292	0.668949	0.838337	1.28385	0.265696	0.419165	0.53016	0.540219	0.374205	0.839693	1.02258	0.42682	0.463772	1.83102	1.0234	2.02562
	21.537	1.22306	0.364633	1.0185	2.18524	0.607657	0.635734	0.597038	0.205692	0.550981	0.188152	0.800263	0.620305	0.675895	0.739619	0.702177	0.878486	1.26299	0.281281	0.416509	0.514984	0.529063	0.366006	0.854846	1.00985	0.427493	0.465737	1.80426	1.01108	2.04421
	21.863	1.22046	0.36559	1.0156	2.19624	0.603896	0.637482	0.599936	0.205929	0.548572	0.196478	0.796543	0.615643	0.672083	0.705275	0.706253	0.912989	1.24872	0.259106	0.406245	0.495039	0.516673	0.357504	0.86249	1.01396	0.426199	0.470299	1.75662	0.997128	2.00842
	22.189	1.20615	0.362939	1.00079	2.21886	0.600547	0.63647	0.598194	0.210264	0.555184	0.199031	0.7916	0.61206	0.668502	0.692871	0.705811	0.936444	1.23158	0.261694	0.416804	0.468571	0.504467	0.351484	0.862704	0.992941	0.423197	0.479703	1.74204	0.981603	1.97489
	22.516	1.18794	0.3628	0.998503	2.24139	0.599827	0.63555	0.600826	0.216163	0.563435	0.202457	0.788786	0.609063	0.666358	0.681547	0.713768	0.937617	1.21064	0.242801	0.414591	0.466855	0.4939	0.347977	0.868709	0.957256	0.42414	0.487253	1.70481	0.970335	1.95177
	22.842	1.18934	0.362581	0.983667	2.31921	0.593202	0.633286	0.604691	0.218481	0.56016	0.204012	0.782683	0.601792	0.659158	0.663667	0.699126	0.932569	1.19944	0.244361	0.424589	0.471384	0.483201	0.339416	0.892011	0.906388	0.426074	0.49677	1.67782	0.958655	1.93727
	23.168	1.18858	0.364935	0.972742	2.37083	0.59067	0.623196	0.609114	0.220433	0.563003	0.189666	0.776298	0.592589	0.656823	0.667958	0.686971	0.92453	1.17675	0.241179	0.422903	0.459463	0.450983	0.328065	0.91005	0.864679	0.42357	0.508569	1.67491	0.945457	1.93694
	23.494	1.19261	0.364359	0.961555	2.42024	0.585052	0.610917	0.606764	0.220773	0.562915	0.196132	0.765547	0.593129	0.653556	0.657978	0.674332	0.910108	1.15242	0.239857	0.415905	0.462246	0.446576	0.312107	0.917969	0.8589	0.42349	0.517493	1.63343	0.94198	1.92923
	23.821	1.18577	0.361417	0.950899	2.44629	0.580502	0.604028	0.611974	0.220788	0.568193	0.193205	0.754357	0.58727	0.653178	0.654167	0.657811	0.89749	1.12336	0.251607	0.420358	0.450626	0.442991	0.296602	0.917475	0.847433	0.424595	0.52664	1.58004	0.930917	1.92101
	24.147	1.17154	0.360635	0.934133	2.44503	0.576976	0.594597	0.607764	0.216966	0.561162	0.192019	0.736631	0.582568	0.651513	0.677304	0.633517	0.876029	1.13681	0.266548	0.41728	0.433071	0.434471	0.282174	0.914952	0.851351	0.425737	0.534733	1.5162	0.915969	1.92587
	24.473	1.18132	0.357414	0.917404	2.43652	0.569933	0.585278	0.603782	0.218766	0.544314	0.18545	0.719257	0.576263	0.645724	0.697257	0.611788	0.847303	1.14492	0.279685	0.406498	0.402661	0.432022	0.266115	0.917243	0.865235	0.413759	0.544005	1.49712	0.89212	1.90913
	24.8	1.16993	0.350742	0.895759	2.55405	0.564249	0.585116	0.605255	0.232484	0.546863	0.181415	0.70366	0.566706	0.634094	0.688274	0.57791	0.79884	1.11576	0.279952	0.404457	0.383212	0.426637	0.25941	0.917363	0.920832	0.405385	0.551188	1.45621	0.859851	1.89148
	25.126	1.15495	0.341364	0.877629	2.4977	0.557663	0.575032	0.592777	0.232592	0.55133	0.167078	0.691432	0.558129	0.628403	0.688365	0.569213	0.770155	1.10802	0.285565	0.402183	0.386594	0.426186	0.252259	0.9206	0.981442	0.402707	0.560007	1.41692	0.82482	1.87061
	25.452	1.16339	0.339909	0.862578	2.50578	0.550238	0.569966	0.595495	0.222422	0.530561	0.161729	0.676269	0.545688	0.617919	0.738909	0.576821	0.728389	1.09999	0.284873	0.405666	0.375783	0.430423	0.248054	0.919833	1.0371	0.398139	0.561034	1.40103	0.801547	1.84848
	25.779	1.155	0.341946	0.847184	2.47553	0.541294	0.567258	0.602111	0.221007	0.525189	0.14821	0.659085	0.535416	0.611738	0.785896	0.572882	0.694349	1.09595	0.288969	0.397265	0.362669	0.433642	0.248619	0.920547	1.04738	0.395555	0.560243	1.36129	0.775278	1.83863
	26.105	1.14377	0.342361	0.844017	2.47465	0.530767	0.559442	0.604089	0.220203	0.528377	0.1357	0.646589	0.531986	0.609875	0.866207	0.561596	0.653973	1.08303	0.290399	0.397164	0.339558	0.450606	0.238011	0.91333	0.996907	0.387167	0.564698	1.34856	0.754362	1.81696
	26.431	1.12456	0.341307	0.84143	2.50847	0.525586	0.556829	0.603624	0.223435	0.523661	0.129053	0.637111	0.529974	0.602718	0.781872	0.57991	0.636789	1.07126	0.287042	0.39968	0.347386	0.446068	0.231003	0.89659	0.906923	0.372147	0.565401	1.32336	0.731958	1.81423
	26.758	1.10942	0.343061	0.831459	2.4916	0.520643	0.555131	0.603964	0.226277	0.520815	0.115726	0.632615	0.523921	0.594879	0.630464	0.61965	0.621091	1.07044	0.283296	0.39661	0.343246	0.43106	0.22466	0.880316	0.793515	0.358954	0.56469	1.32203	0.717238	1.80866
	27.084	1.07746	0.341425	0.825061	2.53606	0.514889	0.553555	0.60835	0.229514	0.518238	0.107948	0.627086	0.522719	0.588833	0.583454	0.662372	0.611099	1.07218	0.276399	0.392603	0.327767	0.428209	0.220383	0.859377	0.691511	0.349367	0.559286	1.31467	0.695641	1.81117
	27.41	1.07301	0.334777	0.817955	2.53143	0.50735	0.559052	0.606946	0.232743	0.520141	0.104003	0.627411	0.522075	0.586712	0.592066	0.679166	0.593651	1.0525	0.268284	0.39173	0.323043	0.433599	0.215698	0.850389	0.615837	0.341624	0.555814	1.32625	0.682466	1.80788
	27.737	1.04902	0.327812	0.80505	2.58872	0.505143	0.556207	0.613462	0.231228	0.517618	0.099159	0.622707	0.520454	0.583325	0.607956	0.709415	0.593493	1.02652	0.261879	0.391184	0.333403	0.408449	0.217511	0.846518	0.573966	0.336566	0.551793	1.30198	0.677409	1.80478
	28.063	1.02752	0.320574	0.795183	2.55938	0.501079	0.560949	0.617561	0.230616	0.517837	0.0944547	0.612961	0.517697	0.580824	0.566837	0.761465	0.591479	0.99811	0.264571	0.400533	0.352205	0.405283	0.212491	0.854415	0.551295	0.337298	0.546028	1.31652	0.671054	1.7947
	28.389	1.01087	0.316907	0.79765	2.54605	0.499423	0.561922	0.618199	0.234626	0.509445	0.0899018	0.608207	0.51834	0.570903	0.549073	0.858388	0.58943	0.978044	0.25815	0.402782	0.345368	0.400857	0.210271	0.857275	0.531785	0.33731	0.540443	1.34124	0.67144	1.78169
	28.715	0.985325	0.310727	0.796205	2.48062	0.492137	0.560816	0.619472	0.235602	0.499916	0.0868338	0.606661	0.522616	0.569599	0.528271	0.969968	0.597691	0.951457	0.255673	0.403132	0.353081	0.393095	0.211645	0.853798	0.512578	0.335325	0.534303	1.29926	0.669968	1.77461
	29.042	0.952038	0.305049	0.795033	2.54854	0.487205	0.569759	0.624948	0.238675	0.506701	0.0942559	0.604816	0.523712	0.563555	0.527127	0.80139	0.585771	0.931165	0.250848	0.404219	0.359459	0.392191	0.212388	0.847353	0.483402	0.332324	0.532214	1.25978	0.664847	1.78054
	29.368	0.962946	0.30268	0.788526	2.48544	0.485639	0.565043	0.627057	0.241451	0.500012	0.0843147	0.604625	0.525632	0.560258	0.523083	0.643696	0.588048	0.91671	0.244426	0.405213	0.359306	0.409829	0.217047	0.839093	0.458287	0.332111	0.527413	1.22507	0.653618	1.78226
	29.694	0.936602	0.300014	0.78183	2.43757	0.481625	0.560698	0.632562	0.241446	0.510809	0.0833313	0.604506	0.524293	0.559808	0.525168	0.544946	0.559506	0.864005	0.239782	0.402806	0.377334	0.416359	0.219942	0.83809	0.436477	0.329678	0.522521	1.19514	0.641326	1.79088
	30.021	0.891116	0.301571	0.779849	2.44364	0.481375	0.560412	0.631578	0.24279	0.504175	0.0791399	0.607991	0.525745	0.564078	0.542411	0.516073	0.53742	0.844648	0.235602	0.402755	0.389888	0.403435	0.225242	0.847494	0.421431	0.327825	0.52299	1.20697	0.63442	1.78583
	30.347	0.902788	0.304754	0.76974	2.41379	0.481082	0.561446	0.633895	0.242682	0.522962	0.0689697	0.610866	0.525216	0.561522	0.557845	0.501388	0.518318	0.831009	0.233505	0.398868	0.394165	0.379528	0.229669	0.850526	0.414301	0.324736	0.519133	1.18878	0.617598	1.77236
	30.673	0.917246	0.302748	0.770085	2.44419	0.484761	0.564991	0.640619	0.237151	0.516291	0.0685213	0.614264	0.527926	0.558222	0.586429	0.484588	0.503327	0.805672	0.228154	0.390843	0.409898	0.369816	0.235374	0.848789	0.415062	0.321353	0.512577	1.1562	0.609741	1.76369
	31	0.896634	0.298657	0.76258	2.37929	0.485367	0.563344	0.64284	0.234361	0.506893	0.054982	0.616188	0.527866	0.556928	0.602891	0.467441	0.500075	0.812676	0.225995	0.386525	0.407247	0.365245	0.241149	0.862127	0.416201	0.319843	0.504563	1.13134	0.596951	1.74768
	31.326	0.867057	0.291984	0.754806	2.41059	0.48915	0.551222	0.650688	0.234133	0.505893	0.0560247	0.61836	0.530588	0.550094	0.618476	0.477781	0.504832	0.823703	0.220109	0.381945	0.39731	0.353636	0.244841	0.872135	0.413721	0.316663	0.499546	1.08683	0.586819	1.72756
	31.652	0.846253	0.28901	0.755163	2.35802	0.492123	0.546388	0.651188	0.23033	0.512412	0.0532874	0.621367	0.528488	0.544412	0.622676	0.478181	0.508557	0.792283	0.217085	0.377534	0.394581	0.346098	0.247406	0.874273	0.407502	0.312421	0.497737	1.0737	0.57666	1.70768
	31.979	0.831366	0.287944	0.756601	2.29083	0.497525	0.545198	0.647533	0.227863	0.51516	0.0569524	0.625147	0.523944	0.538196	0.623696	0.480523	0.521119	0.778749	0.203995	0.375703	0.408376	0.332982	0.247207	0.867735	0.405027	0.308081	0.495725	1.0615	0.563838	1.68129
	32.305	0.807678	0.291544	0.755266	2.3581	0.504209	0.545597	0.651285	0.224756	0.526339	0.0682591	0.62814	0.514791	0.523867	0.621729	0.486781	0.53445	0.791062	0.191161	0.374753	0.424297	0.328514	0.245422	0.86067	0.402687	0.304399	0.497381	1.06963	0.551056	1.64613
	32.631	0.792739	0.290333	0.755936	2.39319	0.508536	0.540043	0.646588	0.223339	0.523281	0.0762995	0.629696	0.506703	0.514922	0.613805	0.505759	0.54229	0.786569	0.180271	0.374156	0.42462	0.316795	0.248232	0.858898	0.40576	0.300459	0.49615	1.04966	0.539747	1.61907
	32.958	0.770305	0.290182	0.754485	2.36957	0.51142	0.537383	0.639264	0.221669	0.51861	0.0879386	0.626636	0.496605	0.505142	0.600211	0.521857	0.539108	0.76303	0.177622	0.37412	0.44517	0.300081	0.254182	0.855284	0.407884	0.298926	0.497684	1.06465	0.52518	1.6017
	33.284	0.771233	0.289482	0.760259	2.26498	0.509187	0.539768	0.640226	0.219865	0.511366	0.0971712	0.625213	0.4876	0.493724	0.5916	0.555685	0.5495	0.764366	0.170281	0.376577	0.447357	0.285741	0.259533	0.853713	0.412196	0.300416	0.494219	1.06143	0.506727	1.57359
	33.61	0.762661	0.291438	0.766923	2.15916	0.509215	0.540692	0.636724	0.218547	0.497895	0.0883098	0.622989	0.481611	0.484473	0.572322	0.575402	0.563776	0.753912	0.162557	0.374859	0.4392	0.267344	0.265118	0.846993	0.412028	0.299929	0.494825	1.08264	0.494341	1.552
	33.936	0.761282	0.293407	0.777457	2.1155	0.507562	0.54609	0.631457	0.217209	0.492666	0.0898378	0.618005	0.473122	0.478117	0.557387	0.607448	0.579026	0.771703	0.150681	0.369974	0.460777	0.244906	0.270211	0.853861	0.411079	0.299586	0.486817	1.07129	0.470979	1.52012
	34.263	0.732197	0.295413	0.781158	2.02337	0.508058	0.550812	0.621542	0.211833	0.495318	0.0904388	0.61493	0.464261	0.4759	0.554432	0.650208	0.597914	0.772333	0.14306	0.370029	0.482192	0.228323	0.275751	0.848924	0.408622	0.29795	0.476774	1.07218	0.44801	1.49088
	34.589	0.709738	0.295112	0.781399	1.98038	0.502881	0.551562	0.61533	0.206851	0.494869	0.0906201	0.612898	0.452179	0.470787	0.550683	0.684382	0.607812	0.771047	0.140333	0.372299	0.499043	0.207528	0.27859	0.846388	0.408571	0.297307	0.465699	1.06875	0.433037	1.45488
	34.915	0.676767	0.297716	0.788005	1.9354	0.502896	0.546368	0.610918	0.209561	0.491826	0.101024	0.611547	0.446869	0.47002	0.55099	0.707	0.604395	0.784	0.134531	0.370907	0.507476	0.190217	0.282988	0.838296	0.407899	0.296761	0.455259	1.12573	0.422715	1.42814
	35.242	0.664444	0.297783	0.795726	1.88683	0.501066	0.540853	0.606967	0.210721	0.491915	0.107096	0.612561	0.440248	0.470664	0.550139	0.731127	0.600169	0.794375	0.127641	0.369766	0.507908	0.175245	0.282169	0.830793	0.405447	0.295265	0.44529	1.1305	0.411793	1.39164
	35.568	0.644245	0.301761	0.800483	1.8155	0.503561	0.535567	0.602652	0.20415	0.487174	0.102525	0.613242	0.42958	0.46921	0.545341	0.757511	0.606122	0.785957	0.120837	0.37553	0.501635	0.171411	0.281846	0.825161	0.407246	0.294653	0.433552	1.17255	0.404772	1.3632
	35.894	0.59148	0.297906	0.803863	1.75928	0.500569	0.530237	0.601173	0.196363	0.478	0.106992	0.609245	0.421079	0.470309	0.534361	0.777031	0.605696	0.779219	0.118093	0.380638	0.496365	0.173183	0.282198	0.812928	0.402693	0.296455	0.422675	1.21476	0.39433	1.33648
	36.221	0.581603	0.299989	0.794187	1.65468	0.500374	0.534677	0.598068	0.191829	0.465704	0.111358	0.599653	0.416404	0.472393	0.516838	0.769047	0.606641	0.767032	0.112098	0.384744	0.500362	0.161331	0.285363	0.804984	0.402103	0.297998	0.414732	1.28722	0.388557	1.31634
	36.547	0.569546	0.298625	0.789276	1.62879	0.499484	0.530648	0.594254	0.186567	0.458448	0.112196	0.596365	0.414963	0.475711	0.497228	0.76776	0.607984	0.76457	0.102512	0.386762	0.488815	0.157379	0.284825	0.801213	0.399668	0.300383	0.407176	1.32316	0.379517	1.29929
	36.873	0.521822	0.295764	0.777099	1.65291	0.497956	0.522307	0.591259	0.186806	0.456489	0.122557	0.598209	0.410442	0.475903	0.47467	0.757257	0.593623	0.764001	0.103628	0.387064	0.47745	0.142867	0.28235	0.788156	0.395762	0.301187	0.399534	1.34059	0.374755	1.28139
	37.2	0.486399	0.294537	0.764986	1.65282	0.499805	0.520407	0.58939	0.184599	0.445276	0.131163	0.598655	0.405487	0.476165	0.45867	0.755387	0.575169	0.755592	0.100491	0.38874	0.48642	0.126487	0.272579	0.769665	0.394901	0.307387	0.392131	1.39853	0.377245	1.25865
	37.526	0.468597	0.295564	0.754481	1.67571	0.500096	0.522033	0.593421	0.182433	0.434919	0.139673	0.597037	0.402838	0.47243	0.44876	0.760217	0.563688	0.752319	0.10166	0.386823	0.498553	0.115075	0.264742	0.745739	0.391392	0.311933	0.386184	1.45415	0.385252	1.24392
	37.852	0.430954	0.29363	0.742724	1.69794	0.497609	0.526807	0.598215	0.183032	0.429621	0.14238	0.592613	0.400335	0.466372	0.442983	0.763056	0.555786	0.742658	0.0961406	0.39063	0.50282	0.100947	0.257499	0.721031	0.388473	0.305937	0.384048	1.54746	0.385694	1.23885
	38.179	0.420571	0.295317	0.734038	1.7217	0.494944	0.532178	0.6086	0.185288	0.42684	0.142715	0.581536	0.397842	0.46277	0.447661	0.761772	0.548429	0.751778	0.0918664	0.393551	0.514176	0.089014	0.250046	0.704964	0.386852	0.300008	0.377998	1.57089	0.385434	1.23017
	38.505	0.38893	0.294228	0.728417	1.75305	0.496064	0.54095	0.611628	0.183971	0.421428	0.142632	0.571459	0.392723	0.457571	0.452873	0.754978	0.532548	0.767525	0.0845517	0.39928	0.519937	0.0878873	0.243366	0.705696	0.382472	0.297903	0.374831	1.62744	0.386786	1.22471
	38.831	0.36431	0.292898	0.724103	1.68565	0.494277	0.54903	0.625294	0.182958	0.420339	0.141146	0.561153	0.386113	0.454341	0.462078	0.749512	0.529382	0.780321	0.0946208	0.403321	0.512208	0.10942	0.229108	0.69852	0.376401	0.300453	0.36913	1.6766	0.386476	1.22842
	39.157	0.36398	0.290654	0.716041	1.66349	0.491457	0.556901	0.632489	0.18377	0.424879	0.137258	0.54964	0.377227	0.448229	0.466051	0.736281	0.524146	0.780329	0.0921325	0.399645	0.506824	0.114406	0.217235	0.682258	0.36636	0.303668	0.361451	1.73742	0.385567	1.22082
	39.484	0.349221	0.287571	0.71161	1.61441	0.484296	0.564487	0.645459	0.184116	0.433379	0.131748	0.548016	0.375105	0.442866	0.470018	0.72448	0.5269	0.790758	0.0920389	0.399365	0.506435	0.0962938	0.202266	0.669707	0.359626	0.308809	0.357154	1.75218	0.38332	1.21709
	39.81	0.322509	0.28633	0.705164	1.59032	0.481564	0.563666	0.653819	0.1835	0.434856	0.127631	0.544369	0.376005	0.437759	0.474369	0.705566	0.534403	0.806023	0.0880054	0.399349	0.506151	0.0840343	0.195278	0.655647	0.356206	0.312165	0.353976	1.72916	0.384639	1.21625
	40.136	0.305549	0.28278	0.702522	1.55031	0.477206	0.579367	0.657581	0.189947	0.432731	0.124965	0.543269	0.379744	0.43314	0.471919	0.705534	0.529577	0.814919	0.0902704	0.403555	0.50263	0.0819736	0.187387	0.646562	0.352802	0.313269	0.353379	1.74245	0.388726	1.20485
	40.463	0.271438	0.286393	0.695981	1.52885	0.475402	0.59183	0.660956	0.198623	0.437346	0.121899	0.541521	0.382172	0.429313	0.466083	0.705086	0.518344	0.816792	0.0815633	0.405749	0.503325	0.0848473	0.183545	0.64169	0.345199	0.314486	0.358925	1.71613	0.395141	1.20063
	40.789	0.258245	0.292042	0.693802	1.4883	0.476387	0.594768	0.664256	0.201022	0.443281	0.112444	0.545752	0.38516	0.424448	0.456125	0.701997	0.498547	0.820438	0.0813041	0.407201	0.494578	0.0853179	0.179288	0.650044	0.339007	0.313589	0.366987	1.68004	0.403369	1.19512
	41.115	0.226931	0.300677	0.69715	1.43048	0.475707	0.601369	0.662202	0.207109	0.447929	0.108928	0.551554	0.389328	0.421167	0.438714	0.694468	0.497908	0.828394	0.0820449	0.411429	0.496817	0.0823086	0.176051	0.651317	0.334145	0.309956	0.366461	1.66433	0.40882	1.18053
	41.442	0.209426	0.307744	0.705753	1.40522	0.473632	0.605733	0.652528	0.214329	0.452393	0.099009	0.554978	0.390055	0.418201	0.423567	0.684219	0.485971	0.831769	0.0854844	0.410312	0.512525	0.0843988	0.179701	0.643541	0.328805	0.305634	0.363056	1.64839	0.420597	1.17182
	41.768	0.179988	0.310902	0.704423	1.47815	0.468559	0.604962	0.650677	0.221255	0.452253	0.0957152	0.556927	0.395155	0.415177	0.402066	0.669315	0.459752	0.819502	0.0873302	0.408917	0.511425	0.0960187	0.185168	0.630692	0.324557	0.299678	0.361092	1.62056	0.431807	1.18023
	42.094	0.130671	0.312161	0.70436	1.50012	0.464874	0.604929	0.649947	0.227409	0.45229	0.0894402	0.56366	0.396195	0.415391	0.39514	0.669089	0.439042	0.831544	0.0894854	0.4056	0.49821	0.118769	0.194999	0.620251	0.32084	0.296011	0.363775	1.58863	0.437971	1.19778
	42.421	0.105317	0.320027	0.704121	1.53069	0.465419	0.60466	0.647376	0.233942	0.452285	0.0786081	0.568204	0.397172	0.416872	0.398692	0.658587	0.419286	0.830718	0.0896704	0.405339	0.494284	0.136311	0.204883	0.606565	0.314726	0.289224	0.368134	1.59	0.446858	1.21691
	42.747	0.084208	0.325194	0.712574	1.71309	0.465683	0.611891	0.638759	0.239826	0.450412	0.0699251	0.565736	0.393167	0.413909	0.404522	0.645566	0.401227	0.799369	0.090919	0.4082	0.492191	0.144373	0.218056	0.591785	0.312082	0.283513	0.374685	1.56144	0.451623	1.23486
	43.073	0.0457935	0.331162	0.720445	1.7829	0.464209	0.610771	0.630252	0.238965	0.447657	0.0619067	0.564435	0.390054	0.416865	0.416475	0.632467	0.393348	0.792927	0.0885681	0.411054	0.485442	0.15049	0.230007	0.587597	0.310603	0.278515	0.3784	1.53068	0.4556	1.24148
	43.4	0.0289719	0.343658	0.73191	1.79018	0.461418	0.612014	0.617718	0.240821	0.446789	0.0590592	0.56948	0.390552	0.408072	0.427681	0.620724	0.396863	0.786947	0.0918407	0.411821	0.483897	0.159657	0.237144	0.572375	0.312208	0.273842	0.381596	1.52585	0.455492	1.253
	43.726	-0.0187597	0.35277	0.739297	1.77581	0.451733	0.610878	0.613827	0.243723	0.44117	0.0598718	0.573171	0.391877	0.4057	0.440581	0.600999	0.399954	0.78189	0.0925008	0.412959	0.489441	0.177512	0.243252	0.564447	0.314708	0.271767	0.379254	1.51408	0.456499	1.26137
	44.052	-0.0195687	0.365252	0.736811	1.74758	0.445999	0.612437	0.607677	0.24699	0.441042	0.0614945	0.578827	0.391143	0.406708	0.451987	0.574293	0.391206	0.755143	0.0913527	0.411654	0.496817	0.190099	0.25369	0.565422	0.318752	0.267885	0.377689	1.50904	0.455276	1.27676
	44.378	-0.0412483	0.373437	0.736052	1.73541	0.443856	0.613177	0.60371	0.24968	0.445208	0.0643653	0.579732	0.391837	0.407699	0.480611	0.552784	0.39255	0.754983	0.0851475	0.411663	0.518547	0.204404	0.263796	0.562124	0.320017	0.262254	0.37479	1.50013	0.452189	1.29066
	44.705	-0.043536	0.377314	0.738923	1.66199	0.437491	0.607123	0.59469	0.252674	0.443808	0.068002	0.579513	0.394328	0.40691	0.522738	0.546049	0.398625	0.760959	0.085578	0.409086	0.549364	0.210277	0.270023	0.552576	0.31629	0.258532	0.371801	1.52257	0.445294	1.29686
	45.031	-0.0510371	0.384392	0.743134	1.59794	0.438945	0.598072	0.590031	0.251511	0.454934	0.0642121	0.57441	0.390008	0.402936	0.544943	0.527464	0.396164	0.743906	0.0785479	0.403468	0.602764	0.213154	0.275799	0.549745	0.311639	0.253588	0.366364	1.55208	0.440446	1.31473
	45.357	-0.0551519	0.380504	0.742025	1.57778	0.439752	0.596835	0.586946	0.252741	0.462132	0.0681211	0.573849	0.389049	0.40095	0.578202	0.513958	0.403011	0.741362	0.071605	0.40108	0.649282	0.211658	0.275724	0.555125	0.30611	0.248306	0.362571	1.57135	0.436744	1.33232
	45.684	-0.0845899	0.378947	0.745565	1.51365	0.438512	0.59208	0.580558	0.252531	0.464188	0.063254	0.573069	0.385214	0.399026	0.595049	0.500403	0.400077	0.730345	0.066279	0.394453	0.677485	0.21408	0.279438	0.56365	0.304148	0.243539	0.359524	1.57981	0.430138	1.34498
	46.01	-0.115039	0.372482	0.745274	1.48284	0.438739	0.589763	0.575789	0.252896	0.468526	0.0608895	0.570246	0.386312	0.397374	0.618189	0.509238	0.399382	0.727903	0.0614033	0.384377	0.709976	0.21445	0.288005	0.576709	0.3004	0.238838	0.357108	1.56178	0.421858	1.366
	46.336	-0.13921	0.376242	0.73273	1.50575	0.435881	0.584035	0.56937	0.250091	0.46904	0.0630732	0.562274	0.389367	0.393645	0.635716	0.510736	0.381063	0.721602	0.048467	0.376643	0.738578	0.210622	0.300111	0.590107	0.299235	0.232173	0.355995	1.56407	0.417343	1.39253
	46.663	-0.156983	0.376253	0.726669	1.56069	0.433932	0.58152	0.562712	0.245141	0.471876	0.0622221	0.550898	0.391581	0.393939	0.632078	0.517674	0.350033	0.689443	0.0416055	0.3735	0.751425	0.20896	0.313403	0.593411	0.295381	0.227346	0.353029	1.53745	0.41664	1.41354
	46.989	-0.210542	0.376549	0.724742	1.47332	0.435587	0.579102	0.553636	0.244902	0.464275	0.0560884	0.540716	0.393887	0.394522	0.636161	0.527841	0.329568	0.676067	0.0374626	0.365695	0.753497	0.212161	0.329075	0.591022	0.287504	0.223631	0.351216	1.52731	0.412214	1.41553
	47.315	-0.212821	0.379988	0.725911	1.43795	0.436521	0.57286	0.546025	0.24478	0.460936	0.0499598	0.529555	0.396871	0.389475	0.64913	0.538845	0.316875	0.659236	0.0416251	0.356969	0.761464	0.225343	0.340454	0.579307	0.277068	0.219037	0.344813	1.52	0.410781	1.41427
	47.642	-0.213401	0.382941	0.719972	1.36581	0.431266	0.57617	0.534773	0.243563	0.461102	0.0436824	0.518205	0.402451	0.38497	0.650199	0.553665	0.308313	0.657602	0.0470351	0.352715	0.754575	0.237764	0.350926	0.570058	0.26949	0.21397	0.341092	1.4641	0.412142	1.42099
	47.968	-0.21361	0.389311	0.707054	1.43692	0.428908	0.572059	0.531211	0.242851	0.458328	0.0446572	0.50968	0.408521	0.382444	0.670128	0.570881	0.324554	0.692984	0.0483158	0.348476	0.728923	0.248522	0.364659	0.568302	0.262147	0.209897	0.336598	1.4537	0.410579	1.42098
	48.294	-0.225232	0.386584	0.696962	1.33713	0.431087	0.565971	0.525105	0.239601	0.454079	0.0377396	0.504348	0.414375	0.375704	0.680074	0.593708	0.339707	0.717902	0.0543057	0.342916	0.706503	0.260614	0.374892	0.563498	0.25399	0.206017	0.332738	1.40341	0.407054	1.40661
	48.621	-0.22854	0.386309	0.684897	1.33479	0.431195	0.559193	0.516346	0.233094	0.451976	0.0406396	0.496915	0.419574	0.371698	0.68272	0.613704	0.340052	0.737313	0.065147	0.341342	0.682231	0.270128	0.38222	0.557217	0.245724	0.202119	0.329245	1.37218	0.407752	1.4036
	48.947	-0.257467	0.381493	0.676473	1.33149	0.429901	0.552441	0.504442	0.232328	0.459572	0.0387783	0.491249	0.429409	0.367495	0.679294	0.633666	0.355098	0.766902	0.0690314	0.342674	0.666033	0.269936	0.38517	0.554761	0.240609	0.200411	0.327199	1.35836	0.404843	1.39801
	49.273	-0.277285	0.381315	0.677051	1.41143	0.42882	0.547175	0.49586	0.229261	0.471916	0.0342862	0.487551	0.434732	0.365292	0.65946	0.644614	0.350288	0.800433	0.0667937	0.347286	0.652265	0.264917	0.387907	0.551352	0.236576	0.196806	0.325373	1.33773	0.403188	1.38826
	49.599	-0.297027	0.378498	0.674196	1.39683	0.425102	0.54834	0.489927	0.228814	0.473586	0.0274958	0.485447	0.442878	0.35972	0.642022	0.654758	0.333272	0.805184	0.0641617	0.343801	0.640976	0.268932	0.38544	0.550054	0.23259	0.193121	0.319658	1.30653	0.396441	1.37321
	49.926	-0.340324	0.369137	0.678896	1.37413	0.421501	0.549262	0.479026	0.226225	0.468295	0.021047	0.48503	0.449308	0.35378	0.618105	0.647815	0.322688	0.795132	0.0634985	0.346621	0.616261	0.270206	0.386091	0.55003	0.22401	0.192038	0.316267	1.27	0.389697	1.36077
	50.252	-0.371659	0.358807	0.683105	1.28747	0.422241	0.54656	0.472956	0.223731	0.482252	0.0162712	0.483734	0.458251	0.351383	0.597536	0.663635	0.312605	0.805549	0.0671425	0.354196	0.587185	0.275976	0.381528	0.554074	0.21669	0.190326	0.314699	1.25499	0.379552	1.35313
	50.578	-0.396096	0.356287	0.696108	1.34215	0.417695	0.545089	0.474693	0.221455	0.490674	0.012534	0.483886	0.465067	0.350378	0.582532	0.668061	0.305442	0.815221	0.0641955	0.351969	0.587564	0.269701	0.377577	0.55799	0.21232	0.189833	0.313079	1.26624	0.369077	1.33701
	50.905	-0.421909	0.35421	0.700941	1.30575	0.411797	0.552054	0.464021	0.217407	0.48923	0.0136523	0.485738	0.472921	0.3468	0.560146	0.66659	0.27646	0.790102	0.0595178	0.35336	0.565189	0.264774	0.364848	0.551096	0.206866	0.186803	0.314561	1.24176	0.35669	1.32054
	51.231	-0.4364	0.351372	0.700277	1.27542	0.412543	0.552416	0.460716	0.218986	0.490923	0.00906549	0.483564	0.476398	0.34714	0.543915	0.669799	0.275028	0.781457	0.0554593	0.353891	0.542687	0.245657	0.353776	0.548777	0.201148	0.184181	0.315626	1.24717	0.342893	1.31285
	51.557	-0.486017	0.35129	0.696856	1.28789	0.40591	0.55208	0.45788	0.218416	0.493224	0.00723016	0.485445	0.479368	0.352123	0.525186	0.660206	0.259523	0.750671	0.0567611	0.350076	0.529662	0.225955	0.339511	0.546334	0.194754	0.183927	0.314381	1.26688	0.331548	1.29671
	51.884	-0.51603	0.354067	0.698365	1.20359	0.402555	0.551366	0.45913	0.217275	0.492468	0.00956317	0.484292	0.48014	0.352364	0.525748	0.656481	0.265226	0.737433	0.0592649	0.34955	0.516042	0.203492	0.324969	0.545078	0.19209	0.18155	0.315346	1.27131	0.320235	1.28825
	52.21	-0.53917	0.349598	0.699933	1.18918	0.397603	0.549386	0.455143	0.218964	0.488566	0.0147521	0.482662	0.478386	0.352529	0.511619	0.63112	0.245714	0.699201	0.0569565	0.347923	0.503678	0.179363	0.310897	0.529731	0.187754	0.17808	0.317845	1.27374	0.310164	1.28095
	52.536	-0.569438	0.344429	0.69767	1.21712	0.390781	0.544969	0.446763	0.215391	0.486472	0.0203174	0.479293	0.47215	0.356332	0.504996	0.607624	0.244741	0.692271	0.0581535	0.348569	0.498171	0.163326	0.296261	0.512649	0.181786	0.176067	0.31333	1.28592	0.297696	1.27066
	52.863	-0.577789	0.339565	0.702294	1.19385	0.390801	0.542448	0.434373	0.207959	0.485902	0.0230277	0.479265	0.467914	0.356498	0.509619	0.594834	0.246778	0.709801	0.0606801	0.346451	0.482952	0.146952	0.285099	0.489008	0.17662	0.171606	0.309447	1.27695	0.292588	1.25594
	53.189	-0.595545	0.335417	0.699597	1.17062	0.3868	0.534779	0.426694	0.206015	0.481578	0.0243239	0.476356	0.465474	0.359692	0.489806	0.562109	0.235703	0.721409	0.0566424	0.347158	0.485134	0.132889	0.274729	0.476781	0.172633	0.165442	0.303811	1.31254	0.289368	1.24076
	53.515	-0.632067	0.334003	0.706511	1.14382	0.384011	0.538634	0.42066	0.201964	0.476615	0.0309388	0.474022	0.462847	0.359352	0.479476	0.54828	0.218585	0.732302	0.0573129	0.350931	0.496049	0.113025	0.270603	0.465	0.169601	0.161554	0.300216	1.32505	0.287171	1.22605
	53.842	-0.639207	0.336498	0.705107	1.11206	0.382269	0.53673	0.414478	0.19624	0.469199	0.0388974	0.474602	0.459051	0.362517	0.472126	0.544679	0.223374	0.763634	0.0567317	0.35028	0.496222	0.102899	0.268859	0.451849	0.167655	0.158488	0.291544	1.34769	0.284297	1.21882
	54.168	-0.639529	0.337212	0.703541	1.10009	0.38045	0.539422	0.412812	0.192383	0.460482	0.0464324	0.474572	0.453054	0.363748	0.451543	0.529369	0.226232	0.783027	0.0536655	0.349059	0.500191	0.0990481	0.265967	0.444382	0.167459	0.15447	0.283146	1.31986	0.275223	1.20918
	54.494	-0.708775	0.339422	0.713968	1.01647	0.375886	0.532224	0.419009	0.187298	0.455514	0.0548027	0.47832	0.452819	0.362384	0.434634	0.508147	0.231431	0.80606	0.0512276	0.348513	0.511812	0.0923255	0.270422	0.436604	0.171214	0.151396	0.276263	1.31406	0.273658	1.20105
	54.82	-0.759831	0.342304	0.715012	0.975051	0.375557	0.529548	0.421593	0.186202	0.461158	0.0600988	0.477645	0.451144	0.364443	0.402849	0.500333	0.236143	0.80617	0.0540872	0.35189	0.531148	0.0855347	0.27769	0.433081	0.17304	0.149871	0.274831	1.35166	0.272949	1.17849
	55.147	-0.790863	0.341575	0.710362	0.991278	0.373303	0.524133	0.42069	0.183759	0.454406	0.0706004	0.474597	0.452605	0.359699	0.372848	0.484467	0.238843	0.795381	0.0468092	0.353284	0.540122	0.0791846	0.285438	0.420231	0.17904	0.148152	0.27103	1.3556	0.275075	1.15867
	55.473	-0.837912	0.339806	0.70172	0.970668	0.372062	0.525709	0.421373	0.182111	0.445001	0.0808067	0.474368	0.452974	0.362514	0.343271	0.466964	0.235819	0.795119	0.0451564	0.353842	0.5424	0.0631995	0.300116	0.405497	0.182006	0.143326	0.266745	1.37877	0.277408	1.13292
	55.799	-0.959436	0.33656	0.687405	0.984659	0.368741	0.524054	0.424354	0.183061	0.4435	0.0889822	0.470544	0.455041	0.360308	0.322095	0.44575	0.220962	0.783406	0.038708	0.354444	0.55114	0.0496315	0.310122	0.395759	0.182404	0.136906	0.263388	1.3747	0.275827	1.11891
	56.126	-1.01463	0.334931	0.673144	0.961627	0.368884	0.518919	0.430908	0.186447	0.438339	0.102718	0.468105	0.456995	0.356373	0.307728	0.435077	0.222436	0.77486	0.033163	0.357005	0.565478	0.039595	0.312357	0.385419	0.183112	0.131484	0.26087	1.40374	0.27014	1.09838
	56.452	-1.02243	0.326974	0.665926	0.96193	0.367648	0.511701	0.437005	0.185885	0.435763	0.119955	0.466316	0.456428	0.358518	0.297006	0.419018	0.217527	0.767116	0.0354194	0.358829	0.58565	0.0346803	0.32055	0.378119	0.183364	0.125786	0.260129	1.37885	0.261264	1.07098
	56.778	-1.05298	0.322412	0.65879	0.959406	0.36458	0.509382	0.447399	0.186964	0.431442	0.132727	0.464309	0.453322	0.355997	0.279884	0.398956	0.218741	0.766652	0.0440717	0.360134	0.599913	0.0287026	0.323183	0.381432	0.182947	0.123307	0.259178	1.37777	0.256565	1.05574
	57.105	-1.05988	0.315156	0.663838	0.970591	0.365158	0.510615	0.446365	0.191552	0.430272	0.143679	0.462818	0.45102	0.354025	0.274961	0.393626	0.216844	0.777268	0.0491527	0.35662	0.613085	0.0203585	0.327032	0.381019	0.180946	0.119347	0.259076	1.37558	0.252176	1.04141
	57.431	-1.08838	0.313968	0.671339	0.940957	0.36396	0.506048	0.452681	0.19696	0.429262	0.154082	0.460722	0.445901	0.352696	0.261525	0.373194	0.206406	0.772733	0.0498986	0.356441	0.623755	0.0189136	0.32824	0.383496	0.17784	0.115282	0.257885	1.37084	0.251256	1.03077
	57.757	-1.10563	0.312436	0.676931	0.943222	0.355711	0.496893	0.457858	0.203717	0.437539	0.157057	0.453243	0.445043	0.351284	0.26933	0.350512	0.20654	0.768257	0.0478095	0.34955	0.63571	0.0110211	0.335504	0.38721	0.175565	0.112919	0.258461	1.37568	0.254981	1.01452
	58.084	-1.11568	0.308452	0.695205	0.930267	0.356117	0.488223	0.463617	0.207859	0.444295	0.148309	0.443907	0.444396	0.354921	0.265799	0.331931	0.207616	0.761803	0.0439044	0.345428	0.65103	0.00942136	0.341267	0.394367	0.17441	0.111828	0.257297	1.39727	0.254241	1.01186
	58.41	-1.12958	0.307024	0.710736	0.919619	0.354419	0.481946	0.464484	0.210376	0.443478	0.144892	0.431238	0.439308	0.352629	0.257009	0.308381	0.215093	0.754793	0.0427126	0.344766	0.66216	0.00298711	0.336301	0.398478	0.171896	0.110131	0.254858	1.43757	0.254009	1.0207
	58.736	-1.10637	0.309046	0.716058	0.946187	0.354776	0.485449	0.462816	0.209798	0.442711	0.140784	0.417631	0.437923	0.349678	0.256368	0.279942	0.213094	0.755321	0.0389671	0.343668	0.663092	0.00555532	0.346953	0.409799	0.168698	0.111817	0.256806	1.46504	0.248752	1.02798
	59.063	-1.09414	0.30969	0.726851	0.903169	0.35515	0.489271	0.470678	0.208298	0.446644	0.141259	0.40906	0.437857	0.347367	0.260127	0.262339	0.220282	0.764416	0.0394635	0.342425	0.66331	0.00742357	0.358049	0.418403	0.170006	0.109273	0.255121	1.48279	0.24495	1.03396
	59.389	-1.08234	0.310148	0.738433	0.915922	0.356039	0.489541	0.469375	0.207097	0.453022	0.143082	0.396399	0.444585	0.346347	0.253394	0.240497	0.238982	0.760603	0.0409184	0.340283	0.675275	0.00522484	0.356506	0.426327	0.170609	0.109489	0.251605	1.49357	0.244232	1.05381
	59.715	-1.06704	0.309794	0.743789	0.917641	0.357493	0.492914	0.466372	0.206422	0.452833	0.140582	0.385233	0.453881	0.342483	0.239081	0.231586	0.25297	0.750927	0.0424245	0.338294	0.673926	-0.000705881	0.358835	0.428492	0.172564	0.109262	0.25139	1.50582	0.23268	1.06229
	60.041	-1.03411	0.30242	0.754658	0.895574	0.358619	0.496333	0.465196	0.206514	0.45052	0.134417	0.377223	0.458422	0.341488	0.231144	0.228539	0.27041	0.766376	0.0385981	0.339317	0.662999	0.00397785	0.365173	0.427085	0.173249	0.108493	0.250728	1.51374	0.2179	1.07768
	60.368	-1.01502	0.295565	0.759687	0.933259	0.359133	0.499852	0.454943	0.2094	0.449555	0.125289	0.374426	0.46473	0.333282	0.216099	0.240298	0.273834	0.785332	0.0356027	0.341901	0.668648	0.00548913	0.376679	0.426598	0.176062	0.108401	0.252191	1.51609	0.205721	1.08731
	60.694	-0.928901	0.291682	0.757236	0.955657	0.361125	0.502781	0.445531	0.207395	0.44519	0.116986	0.373466	0.476444	0.32853	0.202576	0.247144	0.283088	0.80408	0.0325516	0.339697	0.666028	0.0080973	0.385831	0.429259	0.180097	0.107868	0.255644	1.50655	0.190036	1.09267
	61.02	-0.855025	0.283347	0.749398	0.963288	0.363273	0.506501	0.437962	0.207352	0.44406	0.109108	0.371173	0.487911	0.328007	0.186291	0.248358	0.271842	0.82509	0.0343224	0.336306	0.654297	0.0131139	0.396878	0.435494	0.182158	0.105982	0.256853	1.49949	0.173635	1.10626
	61.347	-0.74094	0.27831	0.744503	1.01293	0.362992	0.515149	0.422715	0.211127	0.43982	0.101878	0.371228	0.498545	0.323601	0.177894	0.252611	0.248713	0.836094	0.0305144	0.338559	0.643773	0.015745	0.403902	0.440543	0.185833	0.104565	0.25668	1.47753	0.156101	1.105
	61.673	-0.659829	0.269968	0.733999	1.01947	0.36302	0.515991	0.407535	0.215547	0.433485	0.0950579	0.369041	0.505757	0.320121	0.161122	0.2533	0.220206	0.842255	0.0273486	0.339354	0.63921	0.0298333	0.399742	0.439211	0.188991	0.100097	0.253864	1.4554	0.139903	1.1038
	61.999	-0.566689	0.264854	0.732126	1.08285	0.366919	0.518842	0.399732	0.215801	0.437558	0.0920652	0.360651	0.510961	0.317804	0.1516	0.254265	0.214879	0.851967	0.0342304	0.334763	0.631617	0.0451652	0.381919	0.435768	0.19527	0.0953308	0.247667	1.40659	0.126273	1.1024
	62.326	-0.446843	0.263345	0.722637	1.06564	0.370773	0.50935	0.386301	0.207625	0.439966	0.0824655	0.352169	0.516272	0.31058	0.147484	0.268417	0.210121	0.861563	0.0363949	0.333764	0.615578	0.052347	0.359418	0.432572	0.20046	0.0956873	0.244956	1.40203	0.115294	1.1042
	62.652	-0.381808	0.264555	0.713893	1.06938	0.373167	0.510063	0.376533	0.200187	0.44046	0.0895283	0.350043	0.52436	0.307178	0.12679	0.27373	0.197276	0.877499	0.0459729	0.3368	0.600488	0.0554828	0.331265	0.434482	0.205257	0.0914279	0.242438	1.38118	0.107914	1.10348
	62.978	-0.301427	0.262268	0.694722	1.11308	0.375849	0.503072	0.366776	0.19341	0.439346	0.101334	0.346225	0.532234	0.306371	0.112136	0.267878	0.188769	0.881508	0.0544872	0.34241	0.602166	0.0593332	0.305299	0.435679	0.207853	0.0897375	0.234297	1.35451	0.0980158	1.08685
	63.305	-0.292218	0.260813	0.677819	1.09571	0.378593	0.502823	0.359602	0.190509	0.44146	0.094387	0.337208	0.54023	0.301703	0.100607	0.266714	0.17884	0.871215	0.0587685	0.341996	0.602654	0.0637969	0.292801	0.437664	0.206215	0.0887291	0.227612	1.35041	0.0921413	1.07145
	63.631	-0.272273	0.262228	0.664451	1.12528	0.378235	0.501308	0.360404	0.184791	0.453104	0.0938433	0.330048	0.546531	0.297467	0.0868878	0.260313	0.169508	0.857729	0.0592806	0.348778	0.586944	0.0692803	0.273319	0.443583	0.203311	0.0868284	0.221888	1.3545	0.086061	1.06593
	63.957	-0.291362	0.261865	0.652206	1.05751	0.37671	0.504794	0.354463	0.180854	0.467571	0.0927001	0.325404	0.55345	0.295393	0.0662127	0.259889	0.17037	0.852059	0.0596228	0.354805	0.58293	0.0748257	0.253724	0.446266	0.197807	0.0866523	0.212466	1.37936	0.0827815	1.06069
	64.284	-0.342733	0.264155	0.643758	0.991269	0.372422	0.496401	0.352206	0.180142	0.479668	0.0843053	0.320061	0.559366	0.293049	0.0572097	0.241367	0.163866	0.853003	0.0672317	0.356918	0.594099	0.073626	0.243565	0.451999	0.19	0.0862349	0.203691	1.33876	0.0812182	1.06537
	64.61	-0.377177	0.266111	0.635183	0.926239	0.369844	0.494223	0.34695	0.17939	0.487728	0.0837904	0.312354	0.571224	0.292117	0.0378199	0.228705	0.149151	0.861488	0.0713612	0.359563	0.579072	0.0611076	0.230321	0.466616	0.182751	0.0851553	0.197802	1.31297	0.080657	1.06251
	64.936	-0.455105	0.267811	0.625767	0.882671	0.366156	0.490188	0.344803	0.177627	0.47959	0.0824642	0.307598	0.579544	0.292182	0.0240242	0.212306	0.143935	0.880744	0.0817915	0.361761	0.568474	0.0543053	0.215984	0.478294	0.177161	0.0828168	0.190567	1.30092	0.0816576	1.06256
	65.262	-0.571277	0.264719	0.617379	0.874153	0.367655	0.494145	0.343394	0.175353	0.470403	0.0843282	0.306117	0.583133	0.286442	0.00131254	0.19969	0.142992	0.888612	0.0930029	0.36301	0.554954	0.0487197	0.203424	0.485455	0.172581	0.0827288	0.183631	1.27582	0.0774409	1.06514
	65.589	-0.692283	0.259834	0.612501	0.854384	0.364846	0.489739	0.35075	0.175745	0.469018	0.0808071	0.299312	0.586668	0.286049	-0.0244438	0.178458	0.133322	0.895604	0.0979077	0.36383	0.548065	0.0488802	0.190823	0.48874	0.167631	0.0833406	0.177954	1.27525	0.0747394	1.07285
	65.915	-0.766028	0.257643	0.614119	0.872816	0.361388	0.49009	0.348983	0.172021	0.467023	0.0795215	0.295179	0.590397	0.28351	-0.0402145	0.16683	0.137365	0.918677	0.106575	0.363506	0.540852	0.0459312	0.176073	0.491333	0.16294	0.084461	0.171821	1.25746	0.0702346	1.0797
	66.241	-0.84614	0.256804	0.616174	0.903858	0.360541	0.485792	0.352629	0.165409	0.463138	0.074173	0.296471	0.589621	0.285158	-0.0599597	0.144007	0.147611	0.931039	0.123467	0.363921	0.530352	0.0496681	0.166565	0.488577	0.156407	0.0827776	0.166907	1.26381	0.0636143	1.07957
	66.568	-0.914038	0.257064	0.618583	0.842143	0.359272	0.487019	0.357167	0.162724	0.458786	0.0706012	0.300603	0.583442	0.285907	-0.073788	0.125307	0.159916	0.960401	0.136784	0.360199	0.515394	0.0422765	0.158877	0.490614	0.150573	0.0802855	0.162532	1.25357	0.0618803	1.08555
	66.894	-0.974092	0.260427	0.626038	0.796569	0.351235	0.479276	0.362211	0.160729	0.444938	0.0708497	0.303295	0.573789	0.28914	-0.0962119	0.0973244	0.170543	0.974306	0.141498	0.357896	0.497441	0.0533254	0.149627	0.499434	0.143131	0.0785684	0.156131	1.25084	0.0550163	1.09397
	67.22	-1.01635	0.26234	0.631679	0.813286	0.3448	0.479035	0.358733	0.15786	0.432892	0.0672176	0.305931	0.5641	0.286743	-0.105912	0.0804726	0.197562	1.01871	0.152468	0.355546	0.487522	0.047654	0.140715	0.508978	0.135619	0.0767062	0.152489	1.27054	0.0453097	1.10109
	67.547	-1.0952	0.260858	0.632722	0.818791	0.338626	0.474943	0.364976	0.153111	0.429968	0.0654001	0.304964	0.551938	0.288356	-0.123081	0.0536474	0.212589	1.03461	0.160635	0.350601	0.466093	0.0521002	0.136627	0.514814	0.129249	0.0767543	0.14827	1.28116	0.0336387	1.1031
	67.873	-1.16405	0.262724	0.637473	0.849821	0.33332	0.478971	0.358744	0.152253	0.425013	0.0621161	0.304134	0.545278	0.289143	-0.134415	0.0292918	0.218223	1.03693	0.171144	0.347099	0.444659	0.0430859	0.124693	0.511618	0.123132	0.0750937	0.149142	1.26833	0.0243135	1.10952
	68.199	-1.24386	0.268571	0.645347	0.93833	0.330207	0.476924	0.355987	0.157886	0.427385	0.0505147	0.304609	0.5438	0.287091	-0.149501	0.0124295	0.23015	1.05928	0.176018	0.340072	0.43414	0.0372306	0.118799	0.513045	0.113362	0.073207	0.148726	1.24977	0.0122606	1.11765
	68.526	-1.31742	0.267003	0.663428	1.05032	0.329348	0.470151	0.352024	0.1616	0.427737	0.042787	0.303885	0.540134	0.29112	-0.154786	-0.00294503	0.235077	1.0996	0.180797	0.337076	0.424588	0.0306219	0.114584	0.509638	0.106656	0.0689786	0.149332	1.2176	0.0016347	1.12165
	68.852	-1.40142	0.266499	0.678138	1.157	0.323224	0.463689	0.34268	0.161959	0.423792	0.0411208	0.304096	0.54055	0.29245	-0.156224	-0.0188762	0.218611	1.11128	0.184261	0.329346	0.409023	0.0187952	0.108027	0.499364	0.0997328	0.0667639	0.145705	1.19299	-0.00991894	1.11523
	69.178	-1.51071	0.268224	0.699497	1.20122	0.327822	0.45684	0.34668	0.163921	0.421008	0.0405963	0.2997	0.537601	0.293609	-0.157291	-0.0280666	0.20862	1.12094	0.185633	0.319286	0.405744	0.0164466	0.106637	0.47989	0.0923509	0.0652657	0.141129	1.13952	-0.0213982	1.11256
	69.505	-1.57291	0.274126	0.717658	1.24309	0.329593	0.453665	0.350394	0.165008	0.416692	0.0381049	0.295413	0.532772	0.296445	-0.169169	-0.0518474	0.175621	1.12371	0.180638	0.308681	0.397283	0.027449	0.0990157	0.461388	0.0873897	0.0648292	0.138587	1.1152	-0.0257007	1.11496
	69.831	-1.66046	0.287836	0.731859	1.31164	0.331283	0.446216	0.351098	0.166161	0.417657	0.0436424	0.292231	0.522675	0.291857	-0.157021	-0.0483915	0.148082	1.14444	0.18308	0.298941	0.386263	0.0387409	0.0853195	0.45249	0.0823441	0.0612582	0.135888	1.08704	-0.03344	1.10799
	70.157	-1.72819	0.298754	0.743692	1.35033	0.330168	0.433338	0.349262	0.164306	0.416477	0.0412156	0.289957	0.513965	0.291768	-0.16058	-0.0573402	0.111528	1.1354	0.179818	0.285616	0.373443	0.0445641	0.0769535	0.431622	0.0761838	0.0581938	0.135063	1.081	-0.0411655	1.09583
	70.483	-1.80068	0.306155	0.748713	1.35874	0.327294	0.42454	0.346678	0.164076	0.416808	0.0367744	0.284193	0.50545	0.291002	-0.155978	-0.0659384	0.0787983	1.11559	0.179178	0.276628	0.356417	0.0592517	0.0675403	0.41056	0.070876	0.0542473	0.132242	1.07447	-0.047805	1.06912
	70.81	-1.88043	0.307549	0.751722	1.27692	0.328306	0.41685	0.350896	0.166954	0.413142	0.0298902	0.277749	0.499438	0.284993	-0.150066	-0.0735101	0.0616499	1.09798	0.180685	0.263693	0.342456	0.0707209	0.0568035	0.396492	0.0659301	0.0505562	0.12787	1.0835	-0.0530825	1.05805
	71.136	-1.9381	0.312111	0.75816	1.24268	0.32793	0.410111	0.355143	0.175712	0.414424	0.0349505	0.27618	0.500261	0.288115	-0.143229	-0.0686696	0.0508314	1.07628	0.175049	0.25353	0.332201	0.076628	0.0493172	0.383204	0.0616006	0.047549	0.123258	1.06408	-0.0622418	1.04363
	71.462	-1.98026	0.315694	0.762531	1.18754	0.32858	0.398923	0.356937	0.181032	0.41847	0.0350194	0.275057	0.500091	0.29219	-0.127978	-0.0699683	0.0403674	1.08372	0.177488	0.246707	0.321197	0.0796926	0.035433	0.37649	0.0556945	0.0455623	0.11733	1.0613	-0.0710782	1.02652
	71.789	-2.02025	0.318152	0.758528	1.18279	0.325635	0.390246	0.357099	0.187445	0.417605	0.0277489	0.274109	0.497626	0.292478	-0.133318	-0.060905	0.0304626	1.09049	0.173279	0.239518	0.296096	0.0848638	0.0202969	0.374575	0.0539293	0.0453028	0.112555	1.06921	-0.0743331	1.00831
	72.115	-2.05741	0.322976	0.768661	1.06645	0.328035	0.383953	0.357019	0.195465	0.415538	0.0276649	0.271054	0.496051	0.292362	-0.154175	-0.0785341	0.0118887	1.06299	0.169312	0.235171	0.27089	0.0966423	0.00534564	0.366742	0.0533303	0.0447251	0.108239	1.05061	-0.0825285	0.998064
	72.441	-2.09594	0.326262	0.779525	1.03384	0.322679	0.379127	0.359044	0.198075	0.413159	0.0332324	0.276945	0.495893	0.29266	-0.182273	-0.10091	-0.00588341	1.02628	0.161469	0.228418	0.275244	0.112685	-0.0066187	0.361411	0.051629	0.0442659	0.108416	1.05139	-0.0857164	0.994461
	72.768	-2.13292	0.33463	0.784786	0.923513	0.319	0.37145	0.358209	0.19829	0.408966	0.0348372	0.28377	0.495128	0.296343	-0.195999	-0.10568	-0.00619708	1.03454	0.146166	0.221031	0.267973	0.112082	-0.0242883	0.361492	0.0520157	0.0424338	0.106121	1.0444	-0.0928273	0.974375
	73.094	-2.16926	0.339341	0.791741	0.853092	0.310206	0.360604	0.354444	0.200058	0.403408	0.0382352	0.291686	0.498009	0.299729	-0.208393	-0.125612	-0.0247238	1.02038	0.133882	0.219614	0.246064	0.115564	-0.0359025	0.365119	0.0514655	0.0397759	0.106552	1.01716	-0.0982181	0.955711
	73.42	-2.21177	0.346974	0.790663	0.781402	0.306181	0.357503	0.352452	0.2015	0.401369	0.0429301	0.297391	0.496768	0.30079	-0.210355	-0.134465	-0.0307036	1.00932	0.122198	0.212212	0.232115	0.117738	-0.0542378	0.375392	0.0469826	0.0333201	0.104011	0.993295	-0.102979	0.932685
	73.747	-2.27117	0.351851	0.780985	0.683711	0.310055	0.350777	0.351249	0.200175	0.398867	0.0453322	0.297776	0.491872	0.306592	-0.223649	-0.144325	-0.0274823	0.990731	0.116092	0.208614	0.22494	0.122639	-0.0718401	0.380031	0.0431141	0.0333196	0.104727	0.972748	-0.106975	0.90482
	74.073	-2.33425	0.359126	0.770954	0.579015	0.307612	0.338788	0.35111	0.199177	0.396688	0.0505289	0.300155	0.49069	0.307692	-0.248871	-0.153596	-0.027575	0.9779	0.113498	0.202646	0.222994	0.119406	-0.0844155	0.381597	0.0395369	0.0319394	0.102238	0.978364	-0.112535	0.877737
	74.399	-2.38459	0.366874	0.757043	0.533291	0.30601	0.323031	0.358062	0.201144	0.396513	0.0545247	0.303997	0.489212	0.315412	-0.25319	-0.162336	-0.0264967	0.945785	0.105547	0.19894	0.206366	0.115383	-0.0941557	0.381579	0.0354786	0.030488	0.0975662	0.97286	-0.113203	0.851131
	74.725	-2.44872	0.371181	0.746133	0.431569	0.307207	0.310681	0.361146	0.205409	0.389873	0.0531823	0.308314	0.483653	0.319936	-0.265691	-0.169858	-0.0285524	0.906589	0.0995312	0.198306	0.184435	0.118463	-0.107933	0.377676	0.0299835	0.0275824	0.0918136	0.932893	-0.116194	0.816373
	75.052	-2.48436	0.381982	0.736241	0.379397	0.302902	0.302527	0.354296	0.209555	0.378956	0.0535431	0.310245	0.479722	0.329376	-0.275793	-0.17057	-0.025202	0.892912	0.0950453	0.197394	0.15568	0.117402	-0.123094	0.382902	0.0237784	0.0261798	0.0884177	0.921496	-0.114324	0.779194
		Background-subtracted and normalized intensity in acvr1b-a-/- + 0.4 ng acvr1b-b MO-1 embryos
	Distance from the YSL (µm)	1	2	3	4	5	6
	0	1	1	1	1	1	1
	0.326	1.03541	1.04917	0.997	0.966827	0.934705	1.00734
	0.653	1.0448	1.00724	0.987985	0.956347	0.970621	1.01946
	0.979	1.03886	1.14041	0.985844	0.95329	0.942623	1.02483
	1.305	1.05186	1.09446	0.969047	0.955315	1.05791	1.03382
	1.632	1.13652	1.22324	0.91387	0.943167	1.07191	1.03972
	1.958	1.15509	1.68432	0.896766	0.936039	1.10648	1.04172
	2.284	1.17159	1.73526	0.87981	0.90787	1.1067	1.03851
	2.61	1.22832	1.92965	0.883104	0.901858	1.11911	1.03945
	2.937	1.3011	1.90832	0.881425	0.90148	1.10967	1.06121
	3.263	1.34473	2.14186	0.90007	0.90811	1.12338	1.0663
	3.589	1.30734	2.45119	0.891656	0.912267	1.10724	1.04128
	3.916	1.26193	2.7644	0.894998	0.908488	1.09347	1.0305
	4.242	1.19636	3.01955	0.892928	0.938413	1.08645	1.03412
	4.568	1.14897	3.11609	0.903992	0.958109	1.09911	1.0112
	4.895	1.11515	3.08459	0.901398	0.970206	1.0925	0.990369
	5.221	1.07479	3.07353	0.909036	1.01186	1.12399	0.987465
	5.547	1.03498	2.89065	0.90645	1.03647	1.13799	0.976567
	5.874	1.00694	3.02651	0.891249	1.07627	1.14795	0.968325
	6.2	0.991552	3.06353	0.884237	1.10076	1.14904	0.956814
	6.526	0.983079	3.13545	0.863929	1.12405	1.16037	0.95159
	6.853	0.972524	3.20543	0.866095	1.12995	1.16815	0.957964
	7.179	0.964683	3.25988	0.87302	1.13576	1.17406	0.967435
	7.505	0.954579	3.33468	0.886743	1.13932	1.2048	0.960328
	7.831	0.946143	3.43696	0.9024	1.14461	1.2572	0.951911
	8.158	0.936599	3.31207	0.91122	1.14183	1.31846	0.944264
	8.484	0.93304	3.27969	0.926571	1.13443	1.33604	0.943136
	8.81	0.92409	3.35895	0.937941	1.13418	1.39122	0.940128
	9.137	0.925418	3.26285	0.951205	1.13475	1.49171	0.938417
	9.463	0.928062	3.13741	0.976979	1.13299	1.52801	0.939439
	9.789	0.923373	2.88283	0.998234	1.13722	1.47766	0.940646
	10.116	0.916227	2.84598	1.01415	1.14068	1.42486	0.935521
	10.442	0.908577	2.87999	1.02477	1.15127	1.36984	0.93145
	10.768	0.888419	3.15686	1.02994	1.14628	1.35306	0.930058
	11.095	0.868375	3.3641	1.03331	1.14324	1.3732	0.933253
	11.421	0.848574	3.47983	1.02996	1.14074	1.36575	0.937554
	11.747	0.825771	3.58429	1.03009	1.14026	1.31901	0.941739
	12.074	0.808015	3.68503	1.0265	1.1449	1.31327	0.940396
	12.4	0.797406	3.76562	1.01759	1.14932	1.31745	0.945493
	12.726	0.784365	3.75218	1.00459	1.15205	1.25892	0.945639
	13.052	0.77567	3.73749	0.989294	1.15391	1.21333	0.944446
	13.379	0.767902	3.75449	0.968826	1.14265	1.19824	0.949124
	13.705	0.761426	3.72409	0.956914	1.13439	1.19886	0.947058
	14.031	0.759891	3.68777	0.947856	1.12987	1.18921	0.940663
	14.358	0.758157	3.64122	0.937879	1.11656	1.16573	0.939155
	14.684	0.757273	3.58016	0.926388	1.10629	1.15111	0.939269
	15.01	0.754367	3.54663	0.908914	1.09602	1.15605	0.939803
	15.337	0.755375	3.5355	0.896708	1.08576	1.18387	0.934363
	15.663	0.748987	3.50411	0.888521	1.07981	1.18922	0.924827
	15.989	0.74524	3.45403	0.878979	1.06419	1.16175	0.9178
	16.316	0.740277	3.39613	0.864436	1.04764	1.13898	0.909407
	16.642	0.735327	3.31569	0.850935	1.04061	1.12517	0.905476
	16.968	0.731525	3.2273	0.838207	1.02262	1.11461	0.903982
	17.295	0.727089	3.18091	0.826588	1.01063	1.10597	0.897164
	17.621	0.72456	3.15539	0.820184	1.00051	1.10437	0.891442
	17.947	0.723737	3.14886	0.816378	0.992522	1.10686	0.881346
	18.273	0.725599	3.15966	0.816914	0.978018	1.10385	0.8759
	18.6	0.722367	3.1593	0.818073	0.975904	1.09987	0.868943
	18.926	0.7203	3.15389	0.819484	0.970723	1.09749	0.860624
	19.252	0.716258	3.14514	0.821063	0.959472	1.09359	0.851299
	19.579	0.709818	3.15281	0.825409	0.955438	1.08628	0.845815
	19.905	0.707545	3.16728	0.835163	0.953733	1.08396	0.839016
	20.231	0.702974	3.15775	0.837938	0.953987	1.07914	0.834292
	20.558	0.700529	3.13172	0.841132	0.952473	1.07837	0.825496
	20.884	0.697327	3.10028	0.847702	0.948897	1.07498	0.819369
	21.21	0.696946	3.0775	0.856339	0.943067	1.07602	0.817008
	21.537	0.695836	3.06103	0.865365	0.943653	1.07648	0.807205
	21.863	0.690986	3.06401	0.871078	0.935319	1.07807	0.79972
	22.189	0.688501	3.07676	0.873059	0.935349	1.07702	0.796201
	22.516	0.693059	3.08883	0.873944	0.935003	1.07381	0.788835
	22.842	0.698959	3.0923	0.876965	0.932376	1.07476	0.777629
	23.168	0.704222	3.06022	0.876044	0.932437	1.0747	0.770313
	23.494	0.706953	3.03428	0.874382	0.928513	1.07957	0.763402
	23.821	0.708882	3.04184	0.877695	0.926186	1.08953	0.760708
	24.147	0.714133	3.05029	0.880847	0.92788	1.08825	0.761529
	24.473	0.71265	3.04955	0.881441	0.921798	1.08834	0.755621
	24.8	0.712679	3.06241	0.882908	0.915204	1.09645	0.751858
	25.126	0.714776	3.08755	0.886706	0.906267	1.09311	0.749054
	25.452	0.711258	3.09902	0.891374	0.893459	1.08405	0.745133
	25.779	0.708624	3.12148	0.894235	0.890344	1.07312	0.748608
	26.105	0.704047	3.15652	0.899708	0.885463	1.06695	0.752873
	26.431	0.700385	3.15485	0.904824	0.873017	1.05715	0.754663
	26.758	0.696865	3.18452	0.907241	0.859138	1.05347	0.760378
	27.084	0.689333	3.20031	0.906074	0.851596	1.05265	0.762677
	27.41	0.683235	3.22384	0.905379	0.840365	1.05406	0.763484
	27.737	0.676872	3.25002	0.906767	0.826287	1.04815	0.762061
	28.063	0.672867	3.21597	0.902802	0.808431	1.04655	0.767372
	28.389	0.665374	3.17238	0.901609	0.803597	1.04171	0.774195
	28.715	0.655177	3.16715	0.903927	0.791649	1.03542	0.781041
	29.042	0.644915	3.17641	0.905209	0.779638	1.03258	0.78966
	29.368	0.635979	3.17774	0.899832	0.768623	1.02711	0.79299
	29.694	0.623765	3.17805	0.895741	0.758361	1.02482	0.796363
	30.021	0.614633	3.17106	0.891207	0.753295	1.02872	0.802548
	30.347	0.604016	3.16475	0.879109	0.743582	1.03512	0.806218
	30.673	0.594969	3.15984	0.870072	0.740208	1.03199	0.805606
	31	0.585701	3.14667	0.86774	0.739424	1.02964	0.812865
	31.326	0.578788	3.14244	0.866827	0.72792	1.02651	0.815614
	31.652	0.570531	3.12672	0.867017	0.709391	1.02359	0.817118
	31.979	0.567213	3.09073	0.86705	0.696139	1.01259	0.81878
	32.305	0.559473	3.07171	0.867969	0.689339	1.00403	0.821054
	32.631	0.556405	3.04082	0.866891	0.675484	0.993079	0.818017
	32.958	0.558018	3.00415	0.859847	0.669822	0.979839	0.812548
	33.284	0.558273	2.95896	0.852088	0.65543	0.975013	0.806946
	33.61	0.560561	2.91542	0.845984	0.652339	0.96984	0.803325
	33.936	0.562777	2.87564	0.83128	0.64239	0.965699	0.789588
	34.263	0.561965	2.81601	0.819045	0.631013	0.961116	0.779327
	34.589	0.560762	2.75435	0.812202	0.621146	0.95926	0.77173
	34.915	0.561375	2.71918	0.807666	0.619427	0.948413	0.772262
	35.242	0.560986	2.67371	0.799201	0.60981	0.943726	0.772072
	35.568	0.56296	2.62529	0.790609	0.602753	0.935845	0.769642
	35.894	0.565439	2.59393	0.786131	0.592932	0.926573	0.763499
	36.221	0.56572	2.57888	0.782408	0.589351	0.921681	0.758976
	36.547	0.564458	2.53132	0.771871	0.57311	0.917306	0.755445
	36.873	0.565301	2.48286	0.763534	0.566809	0.916319	0.757592
	37.2	0.564635	2.44933	0.759026	0.554277	0.909072	0.755156
	37.526	0.557962	2.42379	0.75473	0.539397	0.909082	0.752684
	37.852	0.551079	2.40158	0.751365	0.523305	0.903827	0.749748
	38.179	0.538857	2.3847	0.74679	0.512976	0.901644	0.747514
	38.505	0.529323	2.39246	0.739867	0.510794	0.896959	0.744916
	38.831	0.518307	2.38489	0.732911	0.505213	0.892976	0.745796
	39.157	0.510273	2.36512	0.725814	0.496199	0.891196	0.740596
	39.484	0.499904	2.34182	0.713989	0.486851	0.890737	0.73271
	39.81	0.493674	2.31826	0.705362	0.477022	0.88783	0.725856
	40.136	0.485705	2.29678	0.69615	0.465278	0.888944	0.7128
	40.463	0.480431	2.284	0.690772	0.458819	0.88722	0.699915
	40.789	0.479379	2.26971	0.685604	0.451601	0.886326	0.688006
	41.115	0.47415	2.25505	0.681487	0.440564	0.886407	0.680594
	41.442	0.470702	2.22355	0.678191	0.433238	0.879736	0.668883
	41.768	0.470285	2.18385	0.669569	0.429431	0.873462	0.662801
	42.094	0.46504	2.15656	0.658299	0.428112	0.865911	0.653695
	42.421	0.46749	2.1199	0.652072	0.430598	0.857854	0.650466
	42.747	0.463642	2.10099	0.645186	0.427934	0.848661	0.646537
	43.073	0.460819	2.08049	0.638186	0.425261	0.847935	0.644605
	43.4	0.457398	2.03505	0.628661	0.418506	0.844548	0.64079
	43.726	0.45462	2.00644	0.618257	0.416964	0.835533	0.638298
	44.052	0.453718	2.00201	0.610248	0.419211	0.830994	0.638962
	44.378	0.450949	1.97878	0.60123	0.411887	0.819524	0.637848
	44.705	0.447542	1.95053	0.589171	0.414834	0.805262	0.636256
	45.031	0.446651	1.94365	0.581218	0.415959	0.790647	0.635549
	45.357	0.4509	1.94261	0.581249	0.419185	0.780958	0.630979
	45.684	0.45479	1.93868	0.575479	0.425758	0.771692	0.629146
	46.01	0.451668	1.9328	0.566767	0.43571	0.768948	0.622989
	46.336	0.449387	1.93906	0.560476	0.441904	0.763058	0.623566
	46.663	0.444235	1.92973	0.550279	0.449384	0.760583	0.622001
	46.989	0.437721	1.92459	0.540948	0.454842	0.754195	0.620866
	47.315	0.427602	1.92795	0.538281	0.458367	0.747059	0.622815
	47.642	0.419968	1.93725	0.535635	0.462578	0.74414	0.624736
	47.968	0.409718	1.91989	0.534566	0.469411	0.736152	0.629352
	48.294	0.398908	1.88122	0.531372	0.474282	0.731824	0.635786
	48.621	0.389198	1.85831	0.527245	0.473517	0.730076	0.637974
	48.947	0.380405	1.84398	0.526409	0.462962	0.727466	0.641923
	49.273	0.372657	1.82541	0.523318	0.45783	0.725526	0.642555
	49.599	0.360125	1.78202	0.514475	0.439855	0.723897	0.642153
	49.926	0.35333	1.73559	0.511188	0.429253	0.714146	0.636071
	50.252	0.343741	1.70047	0.507829	0.418678	0.70757	0.63552
	50.578	0.330542	1.66497	0.506766	0.414177	0.703883	0.636862
	50.905	0.319939	1.62721	0.503702	0.406251	0.696582	0.632713
	51.231	0.310575	1.59776	0.502619	0.403994	0.69209	0.632936
	51.557	0.296554	1.57268	0.509227	0.394957	0.686125	0.63321
	51.884	0.279806	1.57204	0.511463	0.385349	0.678857	0.631684
	52.21	0.267588	1.55789	0.512529	0.36995	0.672333	0.627559
	52.536	0.254851	1.52529	0.514141	0.353067	0.667583	0.620667
	52.863	0.241026	1.48997	0.509505	0.335818	0.659708	0.618912
	53.189	0.224461	1.45638	0.501932	0.318997	0.649943	0.614208
	53.515	0.211675	1.42744	0.492464	0.301059	0.643314	0.607456
	53.842	0.196975	1.39548	0.479751	0.275054	0.633106	0.608387
	54.168	0.183338	1.36944	0.469054	0.258439	0.624141	0.611061
	54.494	0.170871	1.34663	0.459392	0.235432	0.615518	0.61265
	54.82	0.162921	1.33806	0.457148	0.216811	0.613837	0.61515
	55.147	0.155296	1.34205	0.458229	0.204836	0.615064	0.615627
	55.473	0.151457	1.33077	0.458514	0.19299	0.615433	0.617859
	55.799	0.143812	1.30485	0.456135	0.179795	0.615901	0.61332
	56.126	0.136549	1.29265	0.454237	0.173665	0.617284	0.614792
	56.452	0.129881	1.28146	0.444872	0.160181	0.613487	0.613645
	56.778	0.12411	1.2646	0.434833	0.142554	0.613183	0.610729
	57.105	0.116547	1.2196	0.425008	0.129476	0.608008	0.613041
	57.431	0.108123	1.16089	0.419485	0.112245	0.603308	0.615029
	57.757	0.101742	1.11742	0.41765	0.0977731	0.602563	0.618539
	58.084	0.0952176	1.06871	0.413439	0.0853388	0.598426	0.622037
	58.41	0.0881753	1.02588	0.40624	0.0690044	0.591839	0.622283
	58.736	0.078622	0.981881	0.395253	0.0562329	0.587071	0.617629
	59.063	0.0691395	0.951128	0.383621	0.0366075	0.582027	0.614522
	59.389	0.0579328	0.943903	0.375882	0.0284644	0.578119	0.611893
	59.715	0.0498112	0.92048	0.369378	0.0199492	0.572141	0.609735
	60.041	0.0383059	0.894135	0.363304	0.00825327	0.562027	0.60301
	60.368	0.0263268	0.852083	0.361472	-0.00258241	0.554663	0.594907
	60.694	0.0160477	0.81983	0.35862	-0.0207088	0.545357	0.591481
	61.02	0.00694681	0.790461	0.35556	-0.0337975	0.537171	0.583031
	61.347	-0.00162912	0.753088	0.353322	-0.0527098	0.527152	0.57463
	61.673	-0.0137397	0.717619	0.35227	-0.0757449	0.515618	0.565228
	61.999	-0.0191032	0.677203	0.351923	-0.0969712	0.505455	0.556315
	62.326	-0.0271164	0.639422	0.352439	-0.118648	0.496795	0.551707
	62.652	-0.0354051	0.600716	0.349232	-0.135668	0.494441	0.551006
	62.978	-0.0423713	0.55834	0.343913	-0.159852	0.492608	0.546671
	63.305	-0.0507812	0.521473	0.342343	-0.181613	0.490704	0.545095
	63.631	-0.0573286	0.501116	0.340964	-0.203435	0.487508	0.539538
	63.957	-0.0634063	0.508691	0.333787	-0.225531	0.480523	0.535399
	64.284	-0.0734149	0.513318	0.325533	-0.247128	0.470116	0.534713
	64.61	-0.0786532	0.505431	0.318762	-0.267347	0.460797	0.531033
	64.936	-0.0827488	0.492854	0.31665	-0.28791	0.4534	0.530287
	65.262	-0.0907014	0.464187	0.316465	-0.314031	0.445986	0.526893
	65.589	-0.098729	0.448519	0.317225	-0.343766	0.438506	0.526269
	65.915	-0.107445	0.43736	0.313388	-0.36717	0.428022	0.525389
	66.241	-0.113422	0.426797	0.307111	-0.390387	0.416958	0.518134
	66.568	-0.11831	0.416181	0.299631	-0.411767	0.404028	0.514098
	66.894	-0.125542	0.396737	0.29195	-0.433514	0.389615	0.503525
	67.22	-0.136917	0.384271	0.285648	-0.454856	0.373722	0.489628
	67.547	-0.147429	0.367288	0.279221	-0.476771	0.357045	0.480069
	67.873	-0.159683	0.344755	0.275089	-0.497926	0.342012	0.472935
	68.199	-0.168667	0.305788	0.273152	-0.519505	0.330005	0.470647
	68.526	-0.176183	0.266923	0.270664	-0.538793	0.319486	0.470064
	68.852	-0.182313	0.225621	0.264977	-0.557627	0.313554	0.46862
	69.178	-0.192265	0.179075	0.262049	-0.578528	0.308859	0.462547
	69.505	-0.201314	0.13167	0.256235	-0.596531	0.304419	0.458476
	69.831	-0.210746	0.0873406	0.249189	-0.613659	0.296185	0.453144
	70.157	-0.220998	0.0321078	0.240944	-0.633502	0.291018	0.44416
	70.483	-0.235987	-0.0304597	0.229529	-0.6517	0.283099	0.435346
	70.81	-0.248885	-0.072788	0.219112	-0.667269	0.270223	0.426844
	71.136	-0.262502	-0.120089	0.211002	-0.68409	0.256246	0.420013
	71.462	-0.275675	-0.170002	0.203656	-0.70395	0.241762	0.418808
	71.789	-0.289231	-0.216894	0.196455	-0.726081	0.225257	0.411856
	72.115	-0.300693	-0.254992	0.18938	-0.74513	0.211524	0.401822
	72.441	-0.31064	-0.299925	0.184265	-0.760585	0.198204	0.395519
	72.768	-0.322255	-0.341614	0.176162	-0.780735	0.187955	0.387624
	73.094	-0.331217	-0.372968	0.168713	-0.800844	0.178153	0.377448
	73.42	-0.342261	-0.423609	0.161213	-0.81907	0.171215	0.372448
	73.747	-0.35247	-0.48012	0.153177	-0.832845	0.165115	0.367376
	74.073	-0.362891	-0.5378	0.145601	-0.849071	0.155519	0.363954
	74.399	-0.371718	-0.592513	0.136571	-0.864237	0.145327	0.361954
	74.725	-0.379976	-0.646588	0.12557	-0.879089	0.13486	0.356791
	75.052	-0.386105	-0.698683	0.120134	-0.894161	0.122097	0.347707
		Background-subtracted and normalized intensity in MZoep-/- embryos
	Distance from the YSL (µm)	1	2	3
	0	1	1	1
	0.326	1.01891	0.98887	1.0127
	0.653	1.00764	0.957417	1.02583
	0.979	1.01282	0.968441	1.03359
	1.305	1.00659	0.970309	1.05225
	1.632	1.01829	0.93895	1.06221
	1.958	1.02465	0.933344	1.06555
	2.284	1.01702	0.907068	1.08747
	2.61	1.01448	0.913697	1.08853
	2.937	1.00793	0.92293	1.0756
	3.263	0.99236	0.944663	1.06622
	3.589	0.98391	0.945534	1.05002
	3.916	0.984508	0.94448	1.03901
	4.242	0.977039	0.949343	1.01638
	4.568	0.982267	0.965839	1.00427
	4.895	0.968996	0.982799	0.978906
	5.221	0.947462	1.01235	0.97211
	5.547	0.934059	1.02426	0.94653
	5.874	0.893836	1.02648	0.958911
	6.2	0.903918	1.03077	0.957912
	6.526	0.925082	1.0578	0.949889
	6.853	0.917121	1.12238	0.950331
	7.179	0.935362	1.15014	0.946393
	7.505	0.930485	1.17109	0.947347
	7.831	0.930953	1.14616	0.94068
	8.158	0.926807	1.09838	0.940076
	8.484	0.935583	1.08015	0.944303
	8.81	0.931212	1.14058	0.949755
	9.137	0.943764	1.16693	0.955693
	9.463	0.945104	1.12702	0.955669
	9.789	0.939068	1.06003	0.949769
	10.116	0.938125	1.02578	0.947418
	10.442	0.946806	1.01312	0.944411
	10.768	0.965815	0.994153	0.944975
	11.095	0.974766	0.968442	0.938275
	11.421	0.985535	0.94329	0.929971
	11.747	0.985904	0.927321	0.925887
	12.074	0.991593	0.916645	0.914944
	12.4	1.00111	0.90677	0.906191
	12.726	1.01001	0.89136	0.899627
	13.052	1.01596	0.876544	0.895881
	13.379	1.01908	0.857802	0.88987
	13.705	1.01895	0.844752	0.880683
	14.031	1.02102	0.828771	0.871261
	14.358	1.02544	0.819868	0.860885
	14.684	1.02563	0.817415	0.85588
	15.01	1.02167	0.808662	0.856029
	15.337	1.01556	0.807715	0.859856
	15.663	1.00669	0.823162	0.860829
	15.989	0.998027	0.84116	0.870816
	16.316	0.988919	0.864373	0.876491
	16.642	0.983205	0.894908	0.879044
	16.968	0.977143	0.901711	0.884957
	17.295	0.973881	0.904071	0.888851
	17.621	0.97305	0.889518	0.893586
	17.947	0.971727	0.869612	0.90485
	18.273	0.972098	0.859247	0.911775
	18.6	0.975233	0.875354	0.914139
	18.926	0.978309	0.918632	0.909958
	19.252	0.984521	0.927887	0.903094
	19.579	0.990646	0.907288	0.897337
	19.905	0.992569	0.877415	0.890465
	20.231	0.998078	0.841455	0.881218
	20.558	0.997719	0.825631	0.87183
	20.884	1.00495	0.823727	0.862603
	21.21	1.00608	0.825972	0.858889
	21.537	1.00002	0.827813	0.856891
	21.863	0.994035	0.82093	0.85177
	22.189	0.980108	0.80922	0.846543
	22.516	0.97089	0.809123	0.845037
	22.842	0.957659	0.8078	0.841025
	23.168	0.948178	0.806907	0.829632
	23.494	0.935862	0.808512	0.821471
	23.821	0.922582	0.823602	0.815737
	24.147	0.914343	0.838522	0.812799
	24.473	0.904481	0.854525	0.803099
	24.8	0.89606	0.846195	0.791233
	25.126	0.893526	0.805416	0.772098
	25.452	0.89227	0.753685	0.754768
	25.779	0.887091	0.712312	0.743885
	26.105	0.883622	0.680286	0.734325
	26.431	0.880841	0.656662	0.723599
	26.758	0.876452	0.63915	0.716432
	27.084	0.872101	0.621974	0.712102
	27.41	0.864814	0.597274	0.708647
	27.737	0.860234	0.574963	0.7096
	28.063	0.854975	0.554684	0.709511
	28.389	0.85019	0.539944	0.710932
	28.715	0.844648	0.526326	0.713245
	29.042	0.839521	0.513937	0.717099
	29.368	0.837788	0.507344	0.723468
	29.694	0.832566	0.503915	0.73162
	30.021	0.830121	0.504071	0.739951
	30.347	0.833132	0.504528	0.745195
	30.673	0.843682	0.497226	0.74504
	31	0.852802	0.497026	0.742143
	31.326	0.859936	0.489426	0.743606
	31.652	0.863966	0.473993	0.744644
	31.979	0.867208	0.462874	0.745551
	32.305	0.867758	0.458176	0.756796
	32.631	0.869554	0.455754	0.762819
	32.958	0.873981	0.455618	0.775787
	33.284	0.876631	0.452604	0.789772
	33.61	0.880932	0.45116	0.797447
	33.936	0.881179	0.449714	0.807612
	34.263	0.884473	0.452226	0.815813
	34.589	0.8872	0.454706	0.816849
	34.915	0.890361	0.456566	0.81981
	35.242	0.892729	0.457892	0.826893
	35.568	0.896436	0.461647	0.831632
	35.894	0.89871	0.469239	0.83688
	36.221	0.901354	0.477577	0.839441
	36.547	0.902206	0.480216	0.836897
	36.873	0.90262	0.486895	0.839715
	37.2	0.905824	0.49898	0.838524
	37.526	0.906663	0.509569	0.841155
	37.852	0.907468	0.523493	0.837934
	38.179	0.905645	0.538671	0.833261
	38.505	0.905273	0.541459	0.834003
	38.831	0.906531	0.530586	0.833174
	39.157	0.910574	0.520852	0.827536
	39.484	0.920984	0.513486	0.823933
	39.81	0.933436	0.50925	0.816713
	40.136	0.929734	0.505062	0.808788
	40.463	0.91635	0.50186	0.801201
	40.789	0.90676	0.499691	0.792602
	41.115	0.900121	0.496611	0.784457
	41.442	0.893338	0.492841	0.776717
	41.768	0.889339	0.488881	0.769241
	42.094	0.887971	0.488834	0.764946
	42.421	0.886729	0.486187	0.763464
	42.747	0.889814	0.485776	0.762481
	43.073	0.890745	0.484773	0.76463
	43.4	0.891622	0.487307	0.76335
	43.726	0.892203	0.485348	0.765699
	44.052	0.894945	0.48595	0.762424
	44.378	0.895455	0.486324	0.758245
	44.705	0.892929	0.486114	0.755827
	45.031	0.89384	0.48828	0.742686
	45.357	0.893325	0.489806	0.734452
	45.684	0.889802	0.489722	0.727297
	46.01	0.88969	0.491943	0.719815
	46.336	0.888114	0.496173	0.713529
	46.663	0.883312	0.499771	0.708565
	46.989	0.880152	0.50688	0.69963
	47.315	0.873877	0.507483	0.693027
	47.642	0.869411	0.504702	0.69823
	47.968	0.870372	0.500589	0.696216
	48.294	0.866489	0.493368	0.691114
	48.621	0.861532	0.488622	0.688228
	48.947	0.860923	0.485237	0.687117
	49.273	0.859092	0.484374	0.684038
	49.599	0.859045	0.478483	0.688422
	49.926	0.858872	0.477991	0.691451
	50.252	0.859789	0.477166	0.695327
	50.578	0.857892	0.474699	0.699389
	50.905	0.855168	0.474815	0.705704
	51.231	0.856058	0.479049	0.716355
	51.557	0.856033	0.481713	0.719909
	51.884	0.857334	0.486592	0.729488
	52.21	0.857799	0.490909	0.740313
	52.536	0.860293	0.498619	0.750386
	52.863	0.860734	0.504247	0.757025
	53.189	0.862155	0.506133	0.769815
	53.515	0.868168	0.505481	0.778769
	53.842	0.871026	0.510767	0.79155
	54.168	0.872901	0.511411	0.799452
	54.494	0.879808	0.510962	0.805952
	54.82	0.886817	0.507534	0.808385
	55.147	0.89776	0.50668	0.820091
	55.473	0.908431	0.508396	0.825137
	55.799	0.91691	0.509632	0.823845
	56.126	0.924856	0.512983	0.826024
	56.452	0.932829	0.515717	0.827585
	56.778	0.942456	0.511991	0.831275
	57.105	0.949164	0.509843	0.835111
	57.431	0.952278	0.508452	0.843774
	57.757	0.958625	0.505378	0.84612
	58.084	0.960911	0.509607	0.844993
	58.41	0.965377	0.513668	0.8423
	58.736	0.970938	0.521316	0.837303
	59.063	0.972283	0.525901	0.835594
	59.389	0.974323	0.528441	0.834948
	59.715	0.978297	0.531516	0.832664
	60.041	0.979731	0.535572	0.82811
	60.368	0.975604	0.539205	0.831014
	60.694	0.97107	0.54229	0.838781
	61.02	0.96915	0.551444	0.841108
	61.347	0.963453	0.554463	0.844443
	61.673	0.960465	0.554253	0.850359
	61.999	0.958871	0.556047	0.854658
	62.326	0.959353	0.555385	0.863867
	62.652	0.954867	0.553811	0.868851
	62.978	0.94742	0.551245	0.875688
	63.305	0.942648	0.551342	0.87603
	63.631	0.933461	0.553166	0.873807
	63.957	0.926513	0.55066	0.873935
	64.284	0.924195	0.547689	0.869204
	64.61	0.919391	0.547719	0.865408
	64.936	0.916464	0.548078	0.86088
	65.262	0.910795	0.541414	0.848943
	65.589	0.905402	0.540573	0.838475
	65.915	0.901353	0.534203	0.822575
	66.241	0.894488	0.530189	0.804067
	66.568	0.889932	0.526643	0.775493
	66.894	0.884817	0.525038	0.752912
	67.22	0.883869	0.524072	0.735617
	67.547	0.884472	0.52779	0.717953
	67.873	0.882775	0.529181	0.702413
	68.199	0.882001	0.523712	0.699528
	68.526	0.877733	0.515794	0.686835
	68.852	0.87625	0.50958	0.667153
	69.178	0.872621	0.5021	0.649976
	69.505	0.87323	0.496655	0.629016
	69.831	0.874265	0.49088	0.60797
	70.157	0.87676	0.486402	0.589363
	70.483	0.878129	0.481767	0.570968
	70.81	0.883225	0.478507	0.558517
	71.136	0.88499	0.483408	0.541579
	71.462	0.888837	0.484786	0.528124
	71.789	0.887561	0.48662	0.516057
	72.115	0.8892	0.488417	0.505145
	72.441	0.887774	0.490117	0.499132
	72.768	0.886125	0.485845	0.495278
	73.094	0.887257	0.475261	0.495258
	73.42	0.887436	0.456936	0.491187
	73.747	0.88854	0.437889	0.489154
	74.073	0.889254	0.42392	0.492488
	74.399	0.893547	0.409479	0.495046
	74.725	0.896176	0.398372	0.487717
	75.052	0.901177	0.389907	0.487792

## Sheet: Figure 5 - figure supplement 1D
	Figure 5 - figure supplement 1D
	Cyclops-GFP
		Mean number of Cyclops-GFP puncta (5 µm bins) in wild-type embryos
	Distance from the YSL (µm)	1	2	3	4	5	6	7	8	9	10	11	12	13	14	15	16	17	18	19	20	21	22	23	24
	0	3	1	0	0	0	0	0	0	0	0	0	2	3	1	1	1	0	1	0	1	1	1	0	1
	5	21	2	0	0	0	0	2	1	0	5	1	27	38	4	41	7	0	2	1	8	8	8	3	7
	10	17	5	1	4	1	0	1	1	0	8	1	19	20	0	23	2	0	0	0	3	8	13	10	2
	15	9	2	2	0	2	0	2	1	2	6	0	13	17	1	30	2	1	0	3	4	0	4	6	8
	20	6	1	1	0	0	0	2	0	4	1	1	8	8	1	26	5	0	0	0	3	2	1	4	1
	25	1	0	0	0	0	0	1	3	0	0	0	13	13	1	16	3	0	0	0	2	0	0	1	0
	30	0	0	2	0	0	1	1	0	1	1	0	20	21	0	12	0	0	0	0	0	0	0	0	1
	35	0	0	2	0	0	0	1	0	0	0	0	5	5	0	10	0	0	0	0	0	0	0	0	2
	40	0	0	0	0	0	0	0	0	0	1	0	2	2	1	8	0	0	1	0	0	0	0	0	0
	45	0	0	0	0	0	0	0	0	0	0	0	0	0	0	4	0	0	1	0	1	0	0	0	0
	50	0	0	2	0	0	0	0	0	0	0	0	0	0	0	7	0	0	0	0	0	0	0	0	0
	55	0	0	0	0	0	0	1	0	0	0	0	0	1	1	5	0	0	0	0	0	0	0	0	0
	60	0	0	0	0	0	0	0	0	0	0	0	0	0	0	3	0	0	0	0	0	0	1	0	0
	65	0	0	0	0	0	0	0	0	0	0	0	0	0	0	1	0	0	0	1	0	0	0	0	0
	70	0	0	0	0	0	0	0	0	0	0	0	0	0	0	2	0	0	0	0	0	0	0	0	1
	75	0	0	0	0	0	0	0	0	0	0	0	0	0	0	1	0	0	0	0	0	0	0	0	0
		Mean number of Cyclops-GFP puncta (5 µm bins) in acvr1b-a-/- + 0.4 ng acvr1b-b MO-1 embryos
	Distance from the YSL (µm)	1	2	3	4	5	6	7	8
	0	2	0	0	0	0	1	4	5
	5	31	5	17	0	3	4	21	63
	10	45	8	22	5	4	4	21	42
	15	52	6	31	6	1	14	26	30
	20	39	2	41	6	0	5	13	27
	25	36	2	18	6	0	1	12	16
	30	41	0	10	3	2	1	8	8
	35	45	0	7	10	0	0	4	11
	40	21	2	7	4	0	1	5	5
	45	9	1	2	13	0	0	4	3
	50	10	1	6	8	0	0	4	2
	55	8	1	11	5	0	1	1	1
	60	5	2	3	1	0	0	0	2
	65	0	0	1	1	0	1	0	1
	70	1	0	5	4	1	0	0	1
	75	0	0	0	1	0	0	1	0
		Mean number of Cyclops-GFP puncta (5 µm bins) in MZoep-/- embryos
	Distance from the YSL (µm)	1	2	3	4	5	6	7	8	9
	0	1	0	0	5	2	4	4	13	6
	5	24	4	4	10	24	13	37	53	33
	10	33	2	6	12	20	12	32	40	38
	15	35	3	6	9	17	13	28	31	41
	20	28	6	4	9	15	12	18	34	29
	25	23	7	3	12	13	10	16	31	26
	30	21	1	2	5	4	7	2	17	28
	35	10	3	0	3	5	6	7	12	19
	40	7	0	0	3	0	6	5	14	7
	45	3	0	0	9	2	4	5	6	6
	50	5	0	0	2	2	0	2	4	7
	55	1	0	0	2	5	1	0	5	1
	60	0	0	0	7	1	0	6	3	2
	65	1	0	0	3	3	1	1	1	1
	70	0	0	0	6	0	0	0	3	2
	75	0	0	0	1	0	0	0	1	0

## Sheet: Figure 5 - figure supplement 1E
	Figure 5 - figure supplement 1E
	YSL injections of sqt-GFP
				Phenotype
	Injected mRNA amount	Mutant	Partial rescue - Cyclopia	Partial rescue - separate eyes	Dorsalized	Full gain of function
	Uninjected	29	0	0	0	0
	50 pg sqt-GFP	18	1	0	4	0
	100 pg sqt-GFP	3	2	3	6	1
	150 pg sqt-GFP	0	7	1	11	6
	200 pg sqt-GFP	0	3	0	9	13
