# Supplementary material for: Regulation of Nodal signaling propagation by receptor interactions and positive feedback
Source: eLife. 2022 Sep 23;11:e66397. doi: 10.7554/eLife.66397 (PMC9612913; doi:10.7554/eLife.66397)
Supplement: Figure 5—source data 1. [file elife-66397-fig5-data1.xlsx]

## Sheet: Figure 5C
	Figure 5C
	Squint-GFP
	Distance (µm)	Background-subtracted and normalized intensity in wild type embryos					Mean normalized intensity	SEM		Distance (µm)	Background-subtracted and normalized intensity in acvr1b-a-/- + 0.4 ng acvr1b-b MO-1 embryos						Mean normalized intensity	SEM		Distance (µm)	Background-subtracted and normalized intensity inMZoep-/- embryos								Mean normalized intensity	SEM
		1	2	3	4	5					1	2	3	4	5	6					1	2	3	4	5	6	7	8
	0	1	1	1	1	1	1	0		0	1	1	1	1	1	1	1	0		0	1	1	1	1	1	1	1	1	1	0
	0.463229	0.976824	0.974437	0.977025	1.00199	0.944721	0.975	0.0090916		0.463229	1.01466	0.957671	0.973551	0.99515	0.990698	0.958968	0.981784	0.00914519		0.463229	0.969558	0.982831	0.992947	0.99245	0.986724	0.990914	0.98963	0.966344	0.983925	0.00368393
	0.926459	0.959937	0.960284	0.95189	1.00937	0.912596	0.958816	0.0154011		0.926459	1.03539	0.927412	0.977043	0.984331	0.979686	0.922116	0.970996	0.0170541		0.926459	0.950784	0.967588	0.989009	0.98652	0.980798	0.984806	0.979501	0.944296	0.972913	0.00601817
	1.38969	0.943753	0.918301	0.928563	0.980516	0.876972	0.929621	0.0168689		1.38969	1.05892	0.897272	0.937079	0.970481	0.964127	0.909393	0.956212	0.0236976		1.38969	0.932297	0.956273	0.964654	0.970398	0.968363	0.993157	0.959437	0.919261	0.95798	0.00813698
	1.85292	0.952329	0.912003	0.905869	0.923869	0.848106	0.908435	0.0170642		1.85292	1.07826	0.878871	0.913664	0.968831	0.970827	0.864531	0.945831	0.0320522		1.85292	0.920289	0.949442	0.926044	0.955777	0.958109	1.01782	0.94793	0.899749	0.946895	0.0123985
	2.31615	0.973906	0.86911	0.88689	0.896071	0.814977	0.888191	0.0256274		2.31615	1.11435	0.847474	0.904421	0.95896	0.970493	0.85764	0.942223	0.0401118		2.31615	0.912169	0.930145	0.891656	0.943464	0.941978	1.03725	0.928902	0.872374	0.932243	0.0173707
	2.77938	0.969218	0.826397	0.865873	0.864869	0.784261	0.862124	0.0306837		2.77938	1.15234	0.822431	0.897207	0.937444	0.954318	0.844146	0.934648	0.0482943		2.77938	0.911483	0.921944	0.864421	0.94313	0.930513	1.01628	0.905629	0.859889	0.919162	0.0173697
	3.24261	0.978408	0.814996	0.847825	0.843554	0.764892	0.849935	0.0353578		3.24261	1.19044	0.814038	0.917284	0.936694	0.940852	0.827799	0.937851	0.0552792		3.24261	0.911922	0.912096	0.849017	0.950174	0.918977	1.00561	0.886543	0.840342	0.909335	0.0188797
	3.70583	0.973386	0.787274	0.831089	0.83379	0.755918	0.836292	0.0372094		3.70583	1.18472	0.801204	0.898369	0.920476	0.938356	0.808008	0.92519	0.0569729		3.70583	0.90824	0.905603	0.830697	0.947783	0.902742	0.972731	0.880124	0.827211	0.896891	0.0179776
	4.16906	0.940108	0.77021	0.813894	0.800976	0.734433	0.811924	0.0348567		4.16906	1.1621	0.794968	0.844419	0.915629	0.924466	0.784668	0.904376	0.0568182		4.16906	0.9089	0.895895	0.829504	0.956049	0.897486	0.956672	0.857524	0.81607	0.889762	0.0186295
	4.63229	0.910378	0.762702	0.802002	0.77769	0.714429	0.79344	0.0325449		4.63229	1.09715	0.771782	0.805002	0.893413	0.928832	0.762133	0.876385	0.0519196		4.63229	0.897918	0.873386	0.822234	0.946924	0.892923	0.937871	0.848902	0.796981	0.877142	0.018656
	5.09552	0.891316	0.735132	0.787973	0.757947	0.700838	0.774641	0.0324634		5.09552	1.06229	0.759672	0.777654	0.892602	0.912038	0.733567	0.856304	0.0508075		5.09552	0.879025	0.865426	0.81356	0.920216	0.878459	0.916066	0.836666	0.801431	0.863856	0.0155345
	5.55875	0.859338	0.71958	0.7679	0.739946	0.699403	0.757233	0.0279285		5.55875	1.02625	0.75429	0.741533	0.870947	0.907011	0.71435	0.835731	0.049281		5.55875	0.868479	0.854014	0.802953	0.913352	0.876013	0.89703	0.8329	0.785614	0.853794	0.0156956
	6.02198	0.834114	0.710781	0.745938	0.725051	0.705396	0.744256	0.0235339		6.02198	1.0116	0.745346	0.731632	0.849695	0.905553	0.698999	0.823804	0.0492773		6.02198	0.8635	0.836175	0.784391	0.901044	0.864247	0.865905	0.831001	0.780552	0.840852	0.0147925
	6.48521	0.813844	0.702425	0.737962	0.702757	0.704397	0.732277	0.0214772		6.48521	0.98066	0.744337	0.716874	0.839377	0.923355	0.704304	0.818151	0.0471149		6.48521	0.86153	0.823187	0.777524	0.908501	0.855378	0.849313	0.815369	0.780499	0.833913	0.0155355
	6.94844	0.814759	0.667522	0.7237	0.684296	0.700731	0.718202	0.0258619		6.94844	0.943369	0.721737	0.689176	0.830469	0.933036	0.697029	0.802469	0.0476638		6.94844	0.846759	0.800732	0.774903	0.930541	0.850474	0.833257	0.812746	0.774953	0.828046	0.0179328
	7.41167	0.810892	0.660006	0.71118	0.659326	0.70477	0.709235	0.0276335		7.41167	0.8983	0.699865	0.68164	0.820991	0.923723	0.686091	0.785102	0.045126		7.41167	0.834943	0.782923	0.768999	0.925239	0.835892	0.804546	0.805865	0.772399	0.816351	0.0179905
	7.8749	0.796353	0.631528	0.698567	0.647155	0.713302	0.697381	0.0290771		7.8749	0.858598	0.694085	0.668981	0.814384	0.910444	0.686806	0.772216	0.0417947		7.8749	0.821646	0.772044	0.767798	0.888483	0.830607	0.774673	0.807507	0.76524	0.8035	0.0151547
	8.33813	0.766083	0.617612	0.689158	0.621296	0.690842	0.676998	0.0272994		8.33813	0.814488	0.689638	0.639628	0.806015	0.922784	0.684012	0.759427	0.0435115		8.33813	0.805154	0.763877	0.768162	0.886966	0.82258	0.741264	0.806935	0.76184	0.794597	0.0164419
	8.80136	0.733049	0.599958	0.683694	0.611035	0.665815	0.65871	0.024419		8.80136	0.784158	0.682979	0.618898	0.801608	0.905333	0.677515	0.745082	0.0427189		8.80136	0.798541	0.745803	0.769907	0.899383	0.816545	0.718849	0.802299	0.767944	0.789909	0.0192722
	9.26459	0.709118	0.586857	0.671828	0.598002	0.64802	0.642765	0.0228082		9.26459	0.768296	0.67574	0.606355	0.791344	0.889369	0.660117	0.73187	0.0423175		9.26459	0.788677	0.737134	0.76894	0.897961	0.813581	0.681054	0.813197	0.771957	0.784063	0.0223218
	9.72782	0.6665	0.578343	0.651704	0.583549	0.646479	0.625315	0.0184273		9.72782	0.745953	0.668296	0.581832	0.778734	0.873303	0.650487	0.716434	0.0424832		9.72782	0.774542	0.723656	0.762851	0.90168	0.804662	0.65913	0.814641	0.773135	0.776787	0.024888
	10.191	0.638816	0.563609	0.638383	0.573888	0.633771	0.609693	0.0168177		10.191	0.708394	0.657744	0.569068	0.772925	0.876414	0.648737	0.705547	0.0439251		10.191	0.75665	0.716542	0.760115	0.864793	0.808989	0.636849	0.821182	0.753962	0.764885	0.0246534
	10.6543	0.608759	0.550159	0.633934	0.564193	0.625664	0.596542	0.0167233		10.6543	0.684431	0.651487	0.569437	0.770699	0.909727	0.643188	0.704828	0.0488925		10.6543	0.738306	0.714056	0.755063	0.84135	0.802913	0.626883	0.801076	0.726427	0.750759	0.0234965
	11.1175	0.583761	0.547966	0.621138	0.550795	0.609469	0.582626	0.0148653		11.1175	0.669664	0.645592	0.563122	0.752986	0.904083	0.645178	0.696771	0.0483102		11.1175	0.726781	0.695063	0.753441	0.8224	0.800155	0.614713	0.78156	0.692655	0.735846	0.0240203
	11.5807	0.5687	0.534916	0.611498	0.54003	0.601932	0.571415	0.0155925		11.5807	0.655648	0.638233	0.565219	0.740505	0.837076	0.655989	0.682112	0.0384689		11.5807	0.712935	0.688216	0.73759	0.821837	0.795818	0.601272	0.769372	0.662108	0.723644	0.0257973
	12.044	0.543983	0.518576	0.607707	0.532271	0.605053	0.561518	0.0187558		12.044	0.640929	0.63011	0.55254	0.74047	0.83395	0.66113	0.676522	0.0399592		12.044	0.693186	0.678855	0.722522	0.818412	0.79359	0.588395	0.761621	0.639324	0.711988	0.02757
	12.5072	0.530461	0.507634	0.604523	0.526367	0.606514	0.5551	0.0209425		12.5072	0.631459	0.621585	0.547159	0.722958	0.850145	0.664638	0.672991	0.0424857		12.5072	0.686199	0.677811	0.700786	0.791703	0.782621	0.577672	0.756624	0.615607	0.698628	0.027123
	12.9704	0.525493	0.504813	0.59424	0.514798	0.61061	0.549991	0.0218086		12.9704	0.612648	0.617331	0.539238	0.717641	0.838973	0.675628	0.66691	0.0424098		12.9704	0.673281	0.671859	0.672996	0.7802	0.776751	0.565722	0.754845	0.60307	0.68734	0.0279379
	13.4337	0.513366	0.505757	0.585615	0.506442	0.603149	0.542866	0.021255		13.4337	0.60236	0.609641	0.535732	0.705715	0.809527	0.679691	0.657111	0.0391947		13.4337	0.666097	0.667128	0.652779	0.761236	0.773983	0.551862	0.749323	0.585894	0.676038	0.028812
	13.8969	0.514841	0.499976	0.582786	0.504099	0.589682	0.538277	0.0197584		13.8969	0.594424	0.59931	0.515654	0.69683	0.777272	0.674057	0.642924	0.037584		13.8969	0.652082	0.659182	0.644932	0.754437	0.768768	0.54818	0.751799	0.577186	0.669571	0.0293061
	14.3601	0.509237	0.499187	0.573287	0.504579	0.573004	0.531859	0.0169302		14.3601	0.586597	0.595361	0.520656	0.689031	0.770802	0.676217	0.639777	0.0364747		14.3601	0.649035	0.652851	0.64632	0.739694	0.756839	0.544731	0.748222	0.57087	0.66357	0.0283473
	14.8233	0.49284	0.482674	0.581021	0.497768	0.560933	0.523047	0.0199723		14.8233	0.563327	0.597573	0.511192	0.678313	0.774533	0.711088	0.639338	0.0403683		14.8233	0.641717	0.64068	0.635832	0.725154	0.757875	0.541939	0.740948	0.565136	0.65616	0.0281857
	15.2866	0.462617	0.469737	0.577691	0.493022	0.539813	0.508576	0.0219263		15.2866	0.561973	0.58355	0.536048	0.683452	0.73078	0.741086	0.639482	0.0367091		15.2866	0.627194	0.633843	0.624099	0.714842	0.748531	0.526826	0.744851	0.54588	0.645758	0.0299495
	15.7498	0.473877	0.469943	0.573974	0.493684	0.529749	0.508245	0.0195486		15.7498	0.552892	0.578049	0.53942	0.677583	0.703503	0.691667	0.623852	0.0306007		15.7498	0.616395	0.633048	0.607839	0.707892	0.741658	0.518566	0.746229	0.54292	0.639318	0.0304827
	16.213	0.462819	0.447009	0.576963	0.485821	0.521211	0.498764	0.0231918		16.213	0.545347	0.579058	0.512735	0.668197	0.695998	0.654164	0.60925	0.0301815		16.213	0.608844	0.634032	0.59865	0.70568	0.743264	0.514255	0.736847	0.537598	0.634896	0.0308112
	16.6763	0.451135	0.422389	0.571671	0.473567	0.513706	0.486494	0.0260024		16.6763	0.537132	0.57832	0.511711	0.666377	0.693602	0.611763	0.599817	0.0291678		16.6763	0.611852	0.631463	0.588489	0.701385	0.729148	0.510063	0.729258	0.53276	0.629302	0.0300801
	17.1395	0.438678	0.415029	0.556793	0.467225	0.500258	0.475597	0.0248017		17.1395	0.532084	0.565651	0.49461	0.651935	0.715086	0.581108	0.590079	0.0329685		17.1395	0.601528	0.629217	0.578791	0.696619	0.722433	0.501848	0.721927	0.52419	0.622069	0.0304671
	17.6027	0.442135	0.411935	0.540305	0.459161	0.484712	0.46765	0.0216762		17.6027	0.522233	0.553531	0.501137	0.638068	0.704107	0.549296	0.578062	0.0315972		17.6027	0.603508	0.626	0.573062	0.683187	0.72596	0.49364	0.724731	0.513708	0.617975	0.0316035
	18.0659	0.441641	0.40767	0.536081	0.461183	0.48417	0.466149	0.0215178		18.0659	0.528757	0.55947	0.468892	0.628183	0.677097	0.534386	0.566131	0.0305877		18.0659	0.596887	0.628252	0.563933	0.680107	0.713227	0.490567	0.732227	0.515491	0.615086	0.0316586
	18.5292	0.425408	0.397801	0.52569	0.450232	0.469413	0.453709	0.021641		18.5292	0.521338	0.557738	0.469454	0.618151	0.652651	0.510506	0.554973	0.028262		18.5292	0.591461	0.628406	0.553647	0.680769	0.712602	0.48411	0.721817	0.515524	0.611042	0.0318091
	18.9924	0.420904	0.392589	0.514583	0.443485	0.469175	0.448147	0.0208643		18.9924	0.511441	0.543639	0.436012	0.610159	0.674536	0.504521	0.546718	0.0344735		18.9924	0.594623	0.625996	0.551781	0.670109	0.716982	0.473215	0.73714	0.517949	0.610974	0.033349
	19.4556	0.420018	0.381915	0.503548	0.441712	0.461168	0.441672	0.0203083		19.4556	0.509981	0.539852	0.425369	0.595141	0.663505	0.503745	0.539599	0.0334907		19.4556	0.591033	0.62846	0.537437	0.659825	0.708463	0.464028	0.735016	0.511006	0.604409	0.0339722
	19.9189	0.416435	0.360957	0.502415	0.435701	0.459162	0.434934	0.0234052		19.9189	0.502868	0.535809	0.434723	0.617763	0.654902	0.501901	0.541328	0.0332516		19.9189	0.587762	0.627445	0.529781	0.653651	0.701114	0.46302	0.73668	0.504601	0.600507	0.0341948
	20.3821	0.400995	0.355406	0.49032	0.427931	0.45468	0.425866	0.0229913		20.3821	0.496525	0.533903	0.451812	0.613431	0.655059	0.489081	0.539969	0.032108		20.3821	0.587031	0.620266	0.522291	0.642424	0.700994	0.454689	0.744774	0.49894	0.596426	0.0355575
	20.8453	0.395276	0.35468	0.483241	0.422671	0.460606	0.423295	0.0228902		20.8453	0.492467	0.535601	0.443213	0.591602	0.66819	0.488999	0.536679	0.0333051		20.8453	0.58891	0.619323	0.519121	0.637907	0.705896	0.446893	0.751428	0.499277	0.596094	0.0368598
	21.3085	0.39959	0.353411	0.480211	0.418535	0.463959	0.423141	0.0227611		21.3085	0.489088	0.527645	0.447212	0.589587	0.671709	0.476049	0.533548	0.0341566		21.3085	0.589591	0.615165	0.509287	0.634894	0.699064	0.4434	0.758682	0.495242	0.593165	0.0377734
	21.7718	0.394505	0.347549	0.471857	0.414905	0.457978	0.417359	0.022385		21.7718	0.479208	0.527595	0.428709	0.5897	0.644726	0.481804	0.52529	0.0325378		21.7718	0.575526	0.605571	0.499659	0.627421	0.691591	0.438973	0.767724	0.489521	0.586998	0.0389031
	22.235	0.384547	0.331931	0.46816	0.412719	0.451171	0.409706	0.0243179		22.235	0.469451	0.521553	0.413186	0.589333	0.637057	0.474428	0.517501	0.0339192		22.235	0.579143	0.593271	0.49566	0.619425	0.688653	0.426817	0.781644	0.484118	0.583591	0.0409411
	22.6982	0.373939	0.338598	0.470255	0.409008	0.453714	0.409103	0.0244309		22.6982	0.469603	0.520899	0.426183	0.595808	0.642413	0.473364	0.521378	0.0337824		22.6982	0.57511	0.586339	0.488307	0.620312	0.692584	0.416419	0.795615	0.482215	0.582113	0.0434138
	23.1615	0.365647	0.336083	0.473699	0.401978	0.459773	0.407436	0.026455		23.1615	0.471434	0.524469	0.397079	0.587705	0.646987	0.464456	0.515355	0.0370375		23.1615	0.576632	0.579141	0.479432	0.613559	0.686498	0.40852	0.807249	0.485684	0.579589	0.0448282
	23.6247	0.359876	0.336622	0.476996	0.39988	0.459313	0.406537	0.0272576		23.6247	0.476803	0.520641	0.413466	0.577695	0.64037	0.44787	0.512807	0.0346054		23.6247	0.581219	0.574488	0.477428	0.606323	0.678683	0.41138	0.825581	0.488869	0.580496	0.0459094
	24.0879	0.360262	0.338428	0.468769	0.395193	0.452721	0.403075	0.0253522		24.0879	0.477967	0.514031	0.40307	0.577127	0.651052	0.449252	0.512083	0.0367615		24.0879	0.576624	0.570166	0.475647	0.600381	0.675994	0.400548	0.834033	0.500705	0.579262	0.0469892
	24.5512	0.342161	0.330178	0.46213	0.396873	0.441221	0.394513	0.0261141		24.5512	0.471862	0.509207	0.392333	0.585006	0.64741	0.447684	0.508917	0.0381594		24.5512	0.577367	0.567131	0.472681	0.599921	0.670977	0.393646	0.854594	0.514112	0.581303	0.0490665
	25.0144	0.330793	0.321917	0.45488	0.396967	0.427293	0.38637	0.0261951		25.0144	0.465483	0.497659	0.391536	0.584918	0.642156	0.439146	0.503483	0.038302		25.0144	0.573836	0.559224	0.471355	0.592607	0.670427	0.387605	0.861667	0.533145	0.581233	0.0498471
	25.4776	0.323853	0.341578	0.448696	0.390188	0.419416	0.384746	0.0233373		25.4776	0.465403	0.504837	0.387667	0.5764	0.634655	0.429217	0.499697	0.037779		25.4776	0.572706	0.55743	0.470889	0.601315	0.66867	0.380365	0.869851	0.550434	0.583957	0.0509553
	25.9408	0.313929	0.335816	0.440223	0.38149	0.418052	0.377902	0.0238459		25.9408	0.454345	0.495095	0.397154	0.56346	0.602652	0.421945	0.489109	0.0329804		25.9408	0.573689	0.550197	0.461559	0.600845	0.669234	0.38631	0.866476	0.561965	0.583784	0.0505592
	26.4041	0.313911	0.320856	0.432165	0.379878	0.411229	0.371608	0.0236749		26.4041	0.449468	0.487837	0.389743	0.559992	0.60246	0.422909	0.485402	0.0334761		26.4041	0.565607	0.551809	0.462442	0.601549	0.665633	0.381253	0.850828	0.55799	0.579639	0.0492716
	26.8673	0.304064	0.329346	0.426408	0.37528	0.407863	0.368592	0.0230584		26.8673	0.433223	0.486859	0.388652	0.566424	0.610132	0.422453	0.484624	0.0356681		26.8673	0.551199	0.544861	0.460006	0.59574	0.657228	0.373771	0.834172	0.530921	0.568487	0.0483951
	27.3305	0.306592	0.336739	0.430392	0.369669	0.40101	0.36888	0.0220562		27.3305	0.437165	0.477871	0.413231	0.552165	0.628086	0.415115	0.487272	0.0352739		27.3305	0.550223	0.544393	0.461081	0.592916	0.656864	0.370747	0.834023	0.507889	0.564767	0.0489222
	27.7938	0.299877	0.326437	0.423428	0.365699	0.402674	0.363623	0.0229698		27.7938	0.43781	0.472257	0.407804	0.55345	0.623962	0.411332	0.484436	0.0354821		27.7938	0.541767	0.543925	0.459275	0.58717	0.657771	0.375665	0.812712	0.48483	0.55789	0.0471493
	28.257	0.284172	0.330041	0.426751	0.359056	0.395327	0.359069	0.0248472		28.257	0.427996	0.470307	0.394658	0.554662	0.602046	0.400401	0.475012	0.0349944		28.257	0.527791	0.541157	0.451493	0.588061	0.653342	0.376502	0.802988	0.471387	0.55159	0.0468027
	28.7202	0.279761	0.327624	0.416736	0.354575	0.386629	0.353065	0.023668		28.7202	0.412752	0.466193	0.402905	0.560928	0.599386	0.404462	0.474438	0.035109		28.7202	0.519998	0.538216	0.45012	0.58735	0.642101	0.370752	0.775375	0.455604	0.542439	0.0447752
	29.1834	0.284298	0.318086	0.419089	0.351307	0.376504	0.349857	0.0232514		29.1834	0.407455	0.465248	0.417292	0.563391	0.606157	0.395637	0.475863	0.0361924		29.1834	0.508999	0.537159	0.446319	0.575382	0.641672	0.370078	0.749162	0.453283	0.535257	0.0425308
	29.6467	0.274419	0.320951	0.413071	0.345821	0.368066	0.344466	0.0231571		29.6467	0.415487	0.459581	0.395423	0.575513	0.605154	0.391785	0.473824	0.0383281		29.6467	0.504052	0.527008	0.444886	0.574081	0.633548	0.369096	0.723554	0.451508	0.528467	0.0401087
	30.1099	0.270629	0.317379	0.404325	0.341713	0.359093	0.338628	0.0221582		30.1099	0.409106	0.457562	0.392953	0.569027	0.604071	0.39275	0.470912	0.0380977		30.1099	0.49424	0.52027	0.440049	0.57419	0.625981	0.368069	0.688478	0.440882	0.51902	0.0375461
	30.5731	0.268742	0.302429	0.40142	0.339969	0.350816	0.332675	0.0224836		30.5731	0.422746	0.46581	0.384201	0.549542	0.611962	0.390503	0.470794	0.0375979		30.5731	0.482275	0.515865	0.437511	0.570144	0.626957	0.367525	0.668956	0.448061	0.514662	0.0360017
	31.0364	0.267846	0.307093	0.394386	0.33226	0.352718	0.33086	0.0212731		31.0364	0.42307	0.456041	0.373185	0.546517	0.611053	0.382246	0.465352	0.0387696		31.0364	0.474705	0.516878	0.438519	0.573609	0.627132	0.362559	0.657772	0.441113	0.511536	0.0359738
	31.4996	0.26627	0.307615	0.397604	0.32767	0.354341	0.3307	0.0220548		31.4996	0.413098	0.45811	0.360661	0.543383	0.606663	0.370364	0.458713	0.0402323		31.4996	0.47124	0.506832	0.433314	0.566209	0.626182	0.356769	0.64304	0.43591	0.504937	0.035485
	31.9628	0.261083	0.285985	0.392843	0.321792	0.362404	0.324821	0.0241034		31.9628	0.428435	0.450391	0.362144	0.542342	0.617353	0.36157	0.460373	0.0415901		31.9628	0.46626	0.503437	0.436724	0.564442	0.617734	0.358544	0.63423	0.430027	0.501425	0.03435
	32.4261	0.260092	0.293062	0.377637	0.320762	0.362643	0.322839	0.0216972		32.4261	0.418287	0.44957	0.357964	0.536192	0.609096	0.356675	0.454631	0.0411494		32.4261	0.454152	0.495672	0.440852	0.560752	0.610512	0.356053	0.625127	0.426464	0.496198	0.0335922
	32.8893	0.247852	0.287372	0.368877	0.322825	0.362756	0.317936	0.0228839		32.8893	0.419319	0.448943	0.365103	0.53907	0.607563	0.354316	0.455719	0.0407711		32.8893	0.458072	0.483937	0.444695	0.556049	0.615388	0.346901	0.618931	0.428381	0.494044	0.0337955
	33.3525	0.246985	0.28454	0.366072	0.316383	0.370337	0.316863	0.0236737		33.3525	0.413695	0.453011	0.367441	0.546921	0.604126	0.332957	0.453025	0.0427924		33.3525	0.456308	0.485915	0.44429	0.549695	0.607957	0.349744	0.609749	0.421061	0.49059	0.0325906
	33.8157	0.234813	0.283892	0.354374	0.316951	0.375286	0.313063	0.0250675		33.8157	0.427247	0.4603	0.368109	0.538638	0.5788	0.342185	0.452546	0.038018		33.8157	0.45538	0.484234	0.452798	0.546559	0.608729	0.349262	0.599789	0.405483	0.487779	0.0324245
	34.279	0.242454	0.260319	0.344223	0.318217	0.376114	0.308265	0.0251252		34.279	0.408209	0.45329	0.356995	0.526475	0.572437	0.334146	0.441925	0.0384176		34.279	0.444403	0.481758	0.462459	0.545828	0.606193	0.348273	0.582633	0.397222	0.483596	0.0317552
	34.7422	0.226304	0.290176	0.336759	0.317268	0.388912	0.311884	0.0268107		34.7422	0.407231	0.459003	0.356265	0.525935	0.563245	0.328485	0.440027	0.0380597		34.7422	0.446367	0.473848	0.471861	0.544899	0.60472	0.343959	0.589372	0.389361	0.483048	0.0326269
	35.2054	0.235903	0.297286	0.327827	0.315231	0.390766	0.313403	0.0249624		35.2054	0.416727	0.460409	0.346336	0.52161	0.551661	0.324821	0.436927	0.0374473		35.2054	0.440683	0.466947	0.485152	0.550658	0.601323	0.341385	0.577568	0.392228	0.481993	0.0321437
	35.6687	0.219874	0.289671	0.324725	0.31268	0.392365	0.307863	0.0278578		35.6687	0.407828	0.439875	0.330283	0.514457	0.547106	0.318972	0.42642	0.0381356		35.6687	0.439273	0.465603	0.494561	0.55354	0.597104	0.337283	0.568952	0.392434	0.481094	0.0319426
	36.1319	0.220344	0.285021	0.313084	0.311651	0.400882	0.306196	0.0290359		36.1319	0.398171	0.435038	0.330087	0.506231	0.556245	0.301577	0.421225	0.0403322		36.1319	0.439391	0.460707	0.490592	0.550181	0.602207	0.334601	0.562614	0.386798	0.478386	0.0323555
	36.5951	0.211595	0.286275	0.300151	0.3088	0.40559	0.302482	0.0309836		36.5951	0.399749	0.424605	0.359997	0.512865	0.561322	0.299419	0.426326	0.0395504		36.5951	0.438962	0.459788	0.477574	0.547708	0.596331	0.335172	0.557986	0.381607	0.474391	0.0318205
	37.0583	0.212715	0.279886	0.290954	0.306616	0.400095	0.298053	0.0301238		37.0583	0.397939	0.420111	0.358347	0.501494	0.534777	0.290121	0.417131	0.0369332		37.0583	0.439773	0.458606	0.469612	0.55223	0.596758	0.331711	0.554326	0.374162	0.472147	0.032529
	37.5216	0.208425	0.267681	0.281425	0.309939	0.395056	0.292505	0.0305198		37.5216	0.398413	0.417066	0.348915	0.491404	0.519178	0.288645	0.410604	0.0352074		37.5216	0.444489	0.453908	0.463266	0.553333	0.597898	0.332053	0.545333	0.372733	0.470377	0.0322992
	37.9848	0.207533	0.259364	0.277046	0.309298	0.388422	0.288333	0.0299604		37.9848	0.384236	0.402232	0.356225	0.478244	0.530226	0.284236	0.4059	0.0357972		37.9848	0.43981	0.453111	0.468439	0.548736	0.594797	0.326201	0.541723	0.373638	0.468307	0.0321985
	38.448	0.200916	0.242433	0.266864	0.297425	0.38867	0.279261	0.0315818		38.448	0.376226	0.404951	0.335188	0.473011	0.531485	0.288825	0.401614	0.0364022		38.448	0.436149	0.449627	0.481396	0.550472	0.590627	0.323581	0.534188	0.366906	0.466618	0.0324072
	38.9113	0.188016	0.236361	0.266021	0.294278	0.381241	0.273183	0.0322352		38.9113	0.37563	0.392633	0.349846	0.485298	0.519729	0.293739	0.402813	0.0346498		38.9113	0.432454	0.44	0.491636	0.546415	0.58952	0.321641	0.531281	0.363299	0.464531	0.0326818
	39.3745	0.19727	0.225988	0.261496	0.289264	0.370277	0.268859	0.029765		39.3745	0.36567	0.392087	0.370926	0.472845	0.519919	0.291793	0.402207	0.0333931		39.3745	0.432239	0.440634	0.507769	0.5405	0.584311	0.320027	0.53355	0.363931	0.46537	0.0325581
	39.8377	0.189666	0.220046	0.256735	0.283291	0.360068	0.261961	0.0292324		39.8377	0.358316	0.386144	0.368674	0.46868	0.51122	0.285761	0.396466	0.0331528		39.8377	0.429177	0.437463	0.536396	0.53349	0.589682	0.316803	0.530843	0.35705	0.466363	0.0341508
	40.3009	0.186676	0.210894	0.251711	0.280763	0.33969	0.253947	0.0268838		40.3009	0.352916	0.381956	0.349727	0.474712	0.522149	0.278085	0.393258	0.036589		40.3009	0.430893	0.431346	0.560759	0.531374	0.587307	0.311387	0.531523	0.356356	0.467618	0.0355068
	40.7642	0.178001	0.208046	0.249193	0.278034	0.327841	0.248223	0.0262431		40.7642	0.342093	0.384765	0.338774	0.46798	0.514068	0.281592	0.388212	0.0356621		40.7642	0.424026	0.422132	0.584853	0.527635	0.585005	0.30769	0.530178	0.36037	0.467736	0.0368607
	41.2274	0.163835	0.197572	0.246965	0.276146	0.31364	0.239632	0.0268126		41.2274	0.335435	0.377645	0.326666	0.478249	0.49418	0.278627	0.3818	0.0354885		41.2274	0.41033	0.419173	0.60856	0.519976	0.576452	0.305373	0.528206	0.357673	0.465718	0.038297
	41.6906	0.170144	0.190581	0.243816	0.2777	0.291478	0.234744	0.023738		41.6906	0.334643	0.370044	0.337961	0.47137	0.478226	0.281828	0.379012	0.0324307		41.6906	0.408543	0.420914	0.632922	0.516182	0.575122	0.29698	0.528162	0.353264	0.466511	0.0406997
	42.1539	0.16274	0.175398	0.234526	0.276623	0.281975	0.226253	0.02483		42.1539	0.333002	0.377191	0.324259	0.477991	0.494096	0.277593	0.380689	0.0357903		42.1539	0.404154	0.415046	0.64101	0.511338	0.572684	0.295209	0.52572	0.35644	0.4652	0.0412356
	42.6171	0.170101	0.169563	0.233355	0.271174	0.27187	0.223213	0.0228799		42.6171	0.322139	0.372034	0.322643	0.487229	0.487828	0.277033	0.378151	0.0367005		42.6171	0.405609	0.410837	0.633757	0.506281	0.571	0.295932	0.524703	0.349599	0.462215	0.0408139
	43.0803	0.173071	0.162771	0.227943	0.265753	0.264629	0.218833	0.0219304		43.0803	0.324205	0.383189	0.328835	0.487554	0.464898	0.282254	0.378489	0.0336934		43.0803	0.399419	0.406752	0.592672	0.503493	0.568214	0.287544	0.518546	0.345062	0.452713	0.0386523
	43.5436	0.169189	0.154392	0.2244	0.26052	0.257109	0.213122	0.0220091		43.5436	0.324127	0.378063	0.306525	0.472983	0.444323	0.277315	0.367223	0.032079		43.5436	0.403618	0.408599	0.557724	0.501442	0.569444	0.287113	0.515934	0.351082	0.449369	0.0361159
	44.0068	0.164063	0.165304	0.226325	0.257171	0.257492	0.214071	0.020943		44.0068	0.323606	0.38136	0.328758	0.480328	0.453254	0.27456	0.373644	0.0327185		44.0068	0.399916	0.406216	0.5346	0.500302	0.561581	0.281449	0.518676	0.347224	0.443745	0.0353399
	44.47	0.167633	0.161047	0.223001	0.262349	0.256743	0.214154	0.0214469		44.47	0.309715	0.377659	0.320753	0.493893	0.463899	0.27269	0.373102	0.0363759		44.47	0.398601	0.400939	0.508092	0.493218	0.558908	0.278777	0.522904	0.343859	0.438162	0.0345712
	44.9332	0.152898	0.131087	0.220871	0.257978	0.25554	0.203675	0.0262505		44.9332	0.304077	0.368465	0.299305	0.479607	0.447298	0.272066	0.361803	0.0348915		44.9332	0.396026	0.401124	0.492866	0.488562	0.564125	0.280138	0.519113	0.338086	0.435005	0.0343321
	45.3965	0.140744	0.1318	0.214868	0.251518	0.260974	0.199981	0.027162		45.3965	0.308482	0.352409	0.296714	0.479973	0.454946	0.26992	0.360407	0.0357018		45.3965	0.396294	0.401283	0.468559	0.491738	0.562283	0.279537	0.522043	0.331564	0.431663	0.0342095
	45.8597	0.126346	0.132703	0.214071	0.251556	0.257069	0.196349	0.0282842		45.8597	0.298698	0.364518	0.315035	0.48393	0.477118	0.27216	0.368576	0.0374832		45.8597	0.396842	0.401123	0.458441	0.48851	0.557741	0.286726	0.523667	0.332275	0.430666	0.0330937
	46.3229	0.120757	0.127771	0.210175	0.258551	0.255149	0.194481	0.0299309		46.3229	0.294452	0.369418	0.30034	0.477389	0.465738	0.271842	0.363197	0.0367948		46.3229	0.402929	0.397667	0.454623	0.486752	0.558289	0.282372	0.530831	0.335882	0.431168	0.0335069
	46.7862	0.12686	0.131169	0.208177	0.256841	0.25061	0.194732	0.0281137		46.7862	0.300404	0.373232	0.312552	0.472378	0.473264	0.261256	0.365514	0.0369701		46.7862	0.402497	0.401816	0.461832	0.486844	0.556844	0.2769	0.530268	0.336446	0.431681	0.0338346
	47.2494	0.126158	0.120807	0.211851	0.251824	0.250032	0.192134	0.0289346		47.2494	0.29207	0.369479	0.324463	0.474574	0.477154	0.26009	0.366305	0.0376665		47.2494	0.396244	0.405682	0.498451	0.480279	0.553054	0.2754	0.530442	0.328975	0.433566	0.0348929
	47.7126	0.122394	0.11435	0.204849	0.255055	0.248111	0.188952	0.0300978		47.7126	0.29382	0.359271	0.310749	0.471936	0.471883	0.263598	0.361876	0.0370251		47.7126	0.398595	0.403903	0.531107	0.473194	0.554107	0.275686	0.52749	0.317228	0.435164	0.0365913
	48.1758	0.131692	0.11155	0.20775	0.251729	0.239646	0.188473	0.0284015		48.1758	0.285052	0.360822	0.302597	0.457782	0.517243	0.268176	0.365279	0.0414182		48.1758	0.396799	0.411298	0.527137	0.476811	0.55209	0.280659	0.527223	0.31136	0.435422	0.0362482
	48.6391	0.131936	0.113359	0.208607	0.24846	0.239874	0.188447	0.0278248		48.6391	0.27914	0.35866	0.309113	0.443709	0.51903	0.254969	0.36077	0.0418153		48.6391	0.396753	0.405049	0.526945	0.473423	0.555767	0.28042	0.519034	0.306629	0.433003	0.0364198
	49.1023	0.126038	0.112979	0.204465	0.252923	0.237735	0.186828	0.0286533		49.1023	0.276815	0.345678	0.30195	0.442697	0.49334	0.25397	0.352408	0.0391619		49.1023	0.389052	0.403895	0.535384	0.468991	0.552291	0.274994	0.525374	0.3008	0.431348	0.0377352
	49.5655	0.128151	0.106881	0.199786	0.249469	0.232503	0.183358	0.028242		49.5655	0.278199	0.346051	0.278127	0.449555	0.479081	0.25437	0.347564	0.0391661		49.5655	0.391684	0.401451	0.515344	0.463546	0.550427	0.273833	0.51927	0.300081	0.426955	0.036439
	50.0288	0.116135	0.107022	0.196984	0.246776	0.241387	0.181661	0.0299222		50.0288	0.278656	0.351458	0.257275	0.451768	0.476266	0.239905	0.342555	0.0415445		50.0288	0.392166	0.402651	0.495426	0.466523	0.544357	0.268242	0.520373	0.299573	0.423664	0.0358306
	50.492	0.128993	0.104094	0.200309	0.242405	0.236014	0.182363	0.028089		50.492	0.291973	0.347895	0.238407	0.447399	0.494524	0.243751	0.343991	0.0436923		50.492	0.394188	0.397466	0.484502	0.462082	0.541654	0.265897	0.525155	0.299657	0.421325	0.0356518
	50.9552	0.141648	0.111949	0.19402	0.240519	0.233524	0.184332	0.0252309		50.9552	0.282696	0.334053	0.256111	0.44109	0.507619	0.252668	0.345706	0.0432448		50.9552	0.386856	0.387983	0.465587	0.458568	0.545824	0.268585	0.52372	0.302157	0.41741	0.0351117
	51.4185	0.141329	0.114283	0.190086	0.239164	0.23421	0.183814	0.0247813		51.4185	0.28496	0.329957	0.25056	0.446017	0.489434	0.236546	0.339579	0.0429736		51.4185	0.38342	0.38362	0.452226	0.456577	0.539801	0.261949	0.522526	0.30778	0.413487	0.0346246
	51.8817	0.141134	0.118121	0.185761	0.238202	0.236153	0.183874	0.0243293		51.8817	0.295432	0.325741	0.239349	0.444005	0.476801	0.224312	0.334273	0.0428325		51.8817	0.37718	0.386603	0.447451	0.457851	0.537675	0.259741	0.521603	0.307177	0.41191	0.0346395
	52.3449	0.144639	0.130082	0.18329	0.235426	0.239941	0.186676	0.0225779		52.3449	0.297102	0.332415	0.222437	0.430076	0.468961	0.221119	0.328685	0.0423588		52.3449	0.367848	0.382861	0.445332	0.445659	0.539449	0.258612	0.512068	0.300525	0.406544	0.0345935
	52.8081	0.134534	0.116761	0.180487	0.236878	0.238846	0.181501	0.025252		52.8081	0.293565	0.330731	0.225314	0.434963	0.440205	0.22712	0.325316	0.0391162		52.8081	0.368197	0.375519	0.444574	0.448247	0.536915	0.261543	0.514441	0.295727	0.405646	0.0347327
	53.2714	0.144708	0.133818	0.178405	0.234203	0.235491	0.185325	0.021513		53.2714	0.297024	0.322681	0.229014	0.443551	0.45681	0.224117	0.328866	0.0414397		53.2714	0.361861	0.371112	0.443266	0.445235	0.53194	0.26756	0.509714	0.295603	0.403286	0.0338075
	53.7346	0.131531	0.123352	0.177944	0.228839	0.226618	0.177657	0.0224649		53.7346	0.282502	0.321391	0.221607	0.448051	0.442619	0.222559	0.323122	0.0416165		53.7346	0.36291	0.366965	0.434449	0.438596	0.531113	0.263258	0.505831	0.294209	0.399666	0.0336536
	54.1978	0.134127	0.120089	0.178757	0.226281	0.214333	0.174717	0.021067		54.1978	0.290405	0.324548	0.207684	0.451639	0.447816	0.212071	0.322361	0.0442691		54.1978	0.362758	0.367257	0.424081	0.440299	0.52759	0.262117	0.500067	0.293241	0.397176	0.0330857
	54.6611	0.120176	0.127736	0.175544	0.223647	0.20838	0.171097	0.0207899		54.6611	0.284977	0.325798	0.22635	0.44435	0.437431	0.20708	0.320998	0.0416447		54.6611	0.358414	0.360533	0.407407	0.438022	0.527493	0.263722	0.495807	0.292392	0.392974	0.0327265
	55.1243	0.102841	0.112611	0.172211	0.223381	0.195447	0.161298	0.0233743		55.1243	0.27666	0.328748	0.223941	0.424004	0.434148	0.206054	0.315593	0.0399565		55.1243	0.355392	0.358573	0.387099	0.436981	0.528802	0.254817	0.486052	0.291012	0.387341	0.0329798
	55.5875	0.105651	0.118628	0.171673	0.221824	0.188842	0.161324	0.0217337		55.5875	0.273341	0.323791	0.226626	0.43129	0.436798	0.212643	0.317415	0.0401758		55.5875	0.352307	0.35442	0.382838	0.431194	0.53127	0.257012	0.483677	0.294079	0.385849	0.0327099
	56.0507	0.102623	0.115135	0.174141	0.215478	0.19162	0.159799	0.0218888		56.0507	0.273468	0.313181	0.217663	0.437636	0.426474	0.206649	0.312512	0.0409762		56.0507	0.352384	0.349425	0.386766	0.431861	0.529392	0.258045	0.487469	0.285992	0.385167	0.0332193
	56.514	0.0993145	0.115129	0.175606	0.21624	0.187831	0.158824	0.0222153		56.514	0.268125	0.31635	0.215986	0.427156	0.435257	0.212327	0.312533	0.0406402		56.514	0.347828	0.342348	0.390413	0.427682	0.527017	0.259237	0.478025	0.286123	0.382334	0.0325715
	56.9772	0.0884076	0.0952601	0.175885	0.215751	0.18822	0.152705	0.0256978		56.9772	0.263043	0.315888	0.199623	0.422028	0.467747	0.206536	0.312477	0.0456527		56.9772	0.348263	0.341503	0.393461	0.429132	0.528636	0.258265	0.473183	0.27783	0.381284	0.0330328
	57.4404	0.0911633	0.115282	0.175538	0.219528	0.19132	0.158566	0.0239729		57.4404	0.266144	0.306343	0.211141	0.428007	0.463678	0.208829	0.314024	0.0444937		57.4404	0.347538	0.336814	0.404385	0.429554	0.519723	0.253448	0.479796	0.275233	0.380811	0.0333908
	57.9037	0.077813	0.108266	0.179151	0.2205	0.185118	0.15417	0.0263809		57.9037	0.253875	0.309749	0.204062	0.42425	0.434656	0.204426	0.30517	0.042415		57.9037	0.343307	0.333523	0.417712	0.425249	0.519338	0.259745	0.481382	0.271971	0.381528	0.033483
	58.3669	0.074061	0.10728	0.177723	0.214084	0.179357	0.150501	0.0258144		58.3669	0.246605	0.314626	0.183991	0.413577	0.430317	0.216033	0.300858	0.0422103		58.3669	0.344331	0.334865	0.432123	0.420733	0.513566	0.256233	0.484837	0.272232	0.382365	0.0336482
	58.8301	0.069827	0.103662	0.178566	0.214002	0.182846	0.149781	0.0269868		58.8301	0.245061	0.31891	0.189556	0.409537	0.441808	0.212973	0.302974	0.0428961		58.8301	0.341668	0.328272	0.396274	0.429533	0.505022	0.259435	0.478953	0.267398	0.375819	0.0325579
	59.2934	0.0668741	0.121309	0.175739	0.213746	0.18059	0.151652	0.0258663		59.2934	0.241754	0.308281	0.196979	0.418903	0.459718	0.219396	0.307505	0.0446772		59.2934	0.336401	0.323819	0.366538	0.430898	0.505398	0.253852	0.480249	0.258253	0.369426	0.0336592
	59.7566	0.0685581	0.114442	0.175591	0.212621	0.180967	0.150436	0.0259148		59.7566	0.24613	0.296483	0.179178	0.410605	0.452351	0.237609	0.303726	0.0434994		59.7566	0.340362	0.321714	0.355325	0.435312	0.505934	0.248128	0.475038	0.255716	0.367191	0.0340831
	60.2198	0.0582029	0.108454	0.173143	0.214121	0.179531	0.14669	0.0279439		60.2198	0.241769	0.28797	0.170103	0.399276	0.469306	0.21505	0.297246	0.0469397		60.2198	0.334663	0.320148	0.348391	0.435556	0.505092	0.249004	0.470518	0.253011	0.364548	0.0340538
	60.683	0.0593502	0.118606	0.174303	0.212727	0.176713	0.14834	0.026859		60.683	0.23405	0.28871	0.172959	0.399594	0.474661	0.211947	0.296987	0.0478682		60.683	0.337836	0.324016	0.344855	0.445915	0.504576	0.254568	0.461579	0.251777	0.36564	0.0335918
	61.1463	0.0547513	0.116528	0.176411	0.212706	0.177081	0.147495	0.0278605		61.1463	0.242109	0.289948	0.154309	0.415835	0.437309	0.20667	0.29103	0.046611		61.1463	0.341586	0.326115	0.346328	0.450899	0.50507	0.249466	0.461189	0.251311	0.366495	0.0340469
	61.6095	0.0678683	0.112469	0.173996	0.214904	0.18082	0.150012	0.0263557		61.6095	0.247238	0.287145	0.153782	0.401572	0.437979	0.215127	0.290474	0.0448489		61.6095	0.339928	0.324745	0.343895	0.461913	0.504771	0.25619	0.457791	0.250414	0.367456	0.0341096
	62.0727	0.0680336	0.115667	0.172916	0.216918	0.174228	0.149553	0.0259677		62.0727	0.244707	0.285927	0.158825	0.393407	0.46072	0.222411	0.294333	0.0460321		62.0727	0.34456	0.327328	0.336449	0.463226	0.503411	0.248977	0.452794	0.256667	0.366676	0.0338961
	62.536	0.0683208	0.109477	0.175046	0.215871	0.175347	0.148812	0.0263774		62.536	0.246175	0.28761	0.14414	0.389664	0.46177	0.214468	0.290638	0.0477291		62.536	0.343953	0.326236	0.332753	0.461241	0.505114	0.244611	0.442365	0.262464	0.364842	0.0335069
	62.9992	0.0736488	0.108403	0.172151	0.214864	0.177492	0.149312	0.0255061		62.9992	0.245813	0.297421	0.149539	0.379292	0.462503	0.213083	0.291275	0.0466811		62.9992	0.345306	0.331277	0.319541	0.456613	0.50555	0.242291	0.44054	0.259282	0.36255	0.0337085
	63.4624	0.0756132	0.104613	0.169006	0.216298	0.17877	0.14886	0.0256624		63.4624	0.242144	0.289993	0.164165	0.39538	0.478487	0.207044	0.296202	0.0487879		63.4624	0.346964	0.332896	0.302289	0.456578	0.503617	0.243273	0.444798	0.260471	0.361361	0.0340418
	63.9256	0.0766109	0.0993399	0.165391	0.217765	0.180206	0.147862	0.0261447		63.9256	0.237891	0.290088	0.155318	0.388255	0.500558	0.202524	0.295773	0.0523753		63.9256	0.347895	0.336395	0.296019	0.452657	0.502511	0.23469	0.443919	0.257759	0.358981	0.0345589
	64.3889	0.0666472	0.0991019	0.165507	0.215515	0.169193	0.143193	0.0266531		64.3889	0.239952	0.300846	0.134939	0.384765	0.450862	0.200569	0.285322	0.0480936		64.3889	0.344344	0.340998	0.289478	0.455606	0.502405	0.235485	0.441176	0.263178	0.359084	0.0344499
	64.8521	0.0683699	0.0982508	0.163113	0.208561	0.17166	0.141991	0.0255843		64.8521	0.240587	0.290848	0.144551	0.388076	0.446659	0.191091	0.283635	0.0473633		64.8521	0.352531	0.342019	0.28396	0.448704	0.501596	0.230784	0.437476	0.261709	0.357347	0.0344298
	65.3153	0.0651488	0.104334	0.164035	0.203316	0.165549	0.140477	0.02461		65.3153	0.231499	0.289997	0.147164	0.390952	0.441164	0.192366	0.28219	0.0469159		65.3153	0.3415	0.341142	0.281127	0.440088	0.503244	0.232751	0.436373	0.264554	0.355097	0.0340154
	65.7786	0.0759728	0.0905312	0.160496	0.201017	0.158936	0.137391	0.0234674		65.7786	0.214283	0.299392	0.155206	0.381135	0.449895	0.194105	0.282336	0.0471543		65.7786	0.336945	0.338744	0.281173	0.441399	0.504774	0.224572	0.433732	0.256739	0.35226	0.0350365
	66.2418	0.0757425	0.0882682	0.154329	0.199803	0.150129	0.133654	0.0229		66.2418	0.214946	0.294401	0.161916	0.395078	0.454028	0.188684	0.284842	0.0483425		66.2418	0.331298	0.334479	0.276429	0.436268	0.508094	0.227629	0.433343	0.254814	0.350294	0.0352085
	66.705	0.0746802	0.0873558	0.157395	0.197318	0.150569	0.133464	0.0229391		66.705	0.213228	0.290051	0.15626	0.387467	0.454508	0.181533	0.280508	0.0488424		66.705	0.327713	0.332183	0.273314	0.439435	0.499521	0.226558	0.428595	0.254638	0.347745	0.034723
	67.1683	0.07049	0.0764159	0.155947	0.191157	0.148521	0.128506	0.0236199		67.1683	0.210821	0.301811	0.150367	0.388407	0.416979	0.189317	0.276284	0.0449897		67.1683	0.327537	0.335541	0.273406	0.445893	0.494958	0.221824	0.432525	0.255064	0.348343	0.0351067
	67.6315	0.0801334	0.0786914	0.152612	0.190421	0.149884	0.130348	0.0219955		67.6315	0.217108	0.295077	0.162188	0.383736	0.40366	0.179558	0.273554	0.0424086		67.6315	0.326987	0.328449	0.26338	0.435814	0.496217	0.22698	0.435466	0.24829	0.345198	0.0353148
	68.0947	0.0809383	0.0765832	0.147939	0.187603	0.146471	0.127907	0.0213888		68.0947	0.206707	0.299158	0.162737	0.376582	0.403771	0.171844	0.270133	0.0429148		68.0947	0.320568	0.327123	0.255833	0.433496	0.493302	0.224045	0.431071	0.246433	0.341484	0.0354428
	68.5579	0.0829212	0.0702626	0.149563	0.187366	0.148603	0.127743	0.0221124		68.5579	0.210198	0.298801	0.160789	0.374479	0.418288	0.178694	0.273542	0.0437796		68.5579	0.31993	0.327628	0.250784	0.431928	0.488577	0.223192	0.425057	0.23571	0.337851	0.0355466
	69.0212	0.0868168	0.0855636	0.147019	0.181842	0.151661	0.13058	0.0190842		69.0212	0.21073	0.288835	0.131253	0.37503	0.426629	0.179971	0.268741	0.0471797		69.0212	0.322349	0.325347	0.245765	0.430864	0.489484	0.218343	0.426388	0.239484	0.337253	0.0359351
	69.4844	0.087722	0.078682	0.139675	0.17594	0.15136	0.126676	0.0187431		69.4844	0.215893	0.300863	0.131699	0.369952	0.404876	0.174247	0.266255	0.0448231		69.4844	0.325631	0.320214	0.239058	0.420816	0.481001	0.222052	0.425807	0.243783	0.334795	0.0347222
	69.9476	0.0849765	0.0708481	0.137778	0.171504	0.158347	0.124691	0.0199647		69.9476	0.22444	0.303128	0.119	0.36873	0.38611	0.164105	0.260919	0.0446924		69.9476	0.321203	0.31625	0.238287	0.413673	0.481829	0.218071	0.421689	0.240375	0.331422	0.0347651
	70.4109	0.0741465	0.0732264	0.135271	0.171789	0.154556	0.121798	0.0204738		70.4109	0.225986	0.292678	0.120178	0.374633	0.395873	0.166826	0.262695	0.0454661		70.4109	0.315877	0.312327	0.236031	0.414081	0.478109	0.217669	0.424738	0.233303	0.329017	0.0351741
	70.8741	0.0788501	0.0744926	0.132379	0.167108	0.156317	0.121829	0.0192858		70.8741	0.228623	0.287447	0.12625	0.366541	0.42066	0.17126	0.266797	0.0463275		70.8741	0.314761	0.313157	0.239289	0.410542	0.476356	0.22238	0.424233	0.237828	0.329818	0.0342285
	71.3373	0.0692463	0.0722928	0.137241	0.162795	0.162393	0.120794	0.0209459		71.3373	0.237885	0.279547	0.136875	0.367168	0.422488	0.173678	0.269607	0.0450245		71.3373	0.302759	0.314382	0.238806	0.408413	0.474318	0.21863	0.425756	0.238014	0.327635	0.0343999
	71.8005	0.0632817	0.0745595	0.137066	0.166825	0.152347	0.118816	0.0209821		71.8005	0.233825	0.276337	0.117399	0.357246	0.427585	0.169941	0.263722	0.0472073		71.8005	0.299226	0.317712	0.238358	0.412005	0.477049	0.216151	0.427664	0.237824	0.328249	0.0350551
	72.2638	0.0659663	0.0647074	0.136925	0.15984	0.13883	0.113254	0.019972		72.2638	0.233654	0.285948	0.094842	0.344804	0.419631	0.175538	0.259069	0.0477657		72.2638	0.29642	0.311761	0.245049	0.413716	0.471681	0.205482	0.433237	0.238461	0.326976	0.0354128
	72.727	0.0606712	0.0443544	0.132569	0.161144	0.137534	0.107255	0.0230089		72.727	0.230248	0.283659	0.105501	0.355678	0.413324	0.171887	0.26005	0.0468122		72.727	0.289946	0.313369	0.244789	0.414043	0.4759	0.205012	0.439926	0.23978	0.327845	0.0361791
	73.1902	0.0653607	0.0412499	0.131833	0.157521	0.119611	0.103115	0.021575		73.1902	0.238129	0.268981	0.124689	0.344474	0.398952	0.172782	0.258001	0.0419899		73.1902	0.288042	0.311756	0.246151	0.410441	0.474528	0.204505	0.438422	0.243157	0.327125	0.0357229
	73.6535	0.0654016	0.0322345	0.129376	0.156331	0.118086	0.100286	0.0225301		73.6535	0.242283	0.276817	0.102861	0.337417	0.411118	0.172845	0.257224	0.0453391		73.6535	0.27989	0.305409	0.244291	0.409693	0.476896	0.197521	0.437164	0.246402	0.324658	0.0363973
	74.1167	0.0667985	0.0243505	0.124134	0.148905	0.116982	0.096234	0.0223795		74.1167	0.247126	0.279934	0.0987376	0.328898	0.422011	0.169527	0.257705	0.0468034		74.1167	0.280219	0.31652	0.242739	0.414938	0.479379	0.192059	0.425926	0.244316	0.324512	0.0366287
	74.5799	0.0740459	0.0240685	0.124543	0.145149	0.113537	0.0962687	0.0214402		74.5799	0.247276	0.270331	0.12524	0.339831	0.412811	0.167187	0.260446	0.0434994		74.5799	0.276455	0.310657	0.240287	0.408846	0.481508	0.187219	0.416167	0.244668	0.320726	0.0365634
	75.0432	0.0728408	0.0162642	0.122842	0.140563	0.106779	0.0918577	0.0219441		75.0432	0.245091	0.269242	0.118478	0.336873	0.411625	0.171982	0.258882	0.0435796		75.0432	0.27523	0.308355	0.237418	0.404653	0.480467	0.191444	0.420445	0.243132	0.320143	0.0364496
	75.5064	0.0702771	0.0115847	0.12062	0.136791	0.112679	0.0903902	0.0225593		75.5064	0.24146	0.26411	0.103542	0.351064	0.405966	0.180831	0.257829	0.0449733		75.5064	0.279343	0.308137	0.238808	0.404415	0.483357	0.183474	0.420311	0.239305	0.319644	0.0371795
	75.9696	0.0757221	-0.00557128	0.122247	0.136758	0.115884	0.089008	0.0257187		75.9696	0.241306	0.267059	0.123869	0.340933	0.426368	0.174506	0.26234	0.0448834		75.9696	0.278877	0.307727	0.239968	0.406988	0.48062	0.181591	0.424304	0.23753	0.319701	0.0374284
	76.4328	0.0793425	-0.0130231	0.116568	0.129527	0.11208	0.0848988	0.0258389		76.4328	0.235665	0.259476	0.0995878	0.330351	0.404952	0.172298	0.250388	0.0445055		76.4328	0.278685	0.304054	0.239494	0.408217	0.476628	0.181883	0.425631	0.238102	0.319087	0.0372472
	76.8961	0.0764459	-0.0236595	0.120942	0.127721	0.113002	0.0828902	0.0280703		76.8961	0.228005	0.267747	0.101509	0.352881	0.378326	0.166734	0.2492	0.0435239		76.8961	0.289874	0.303172	0.243326	0.414314	0.473324	0.175641	0.42215	0.237122	0.319865	0.0372289
	77.3593	0.0679241	-0.0193687	0.120142	0.130002	0.11233	0.0822059	0.0275249		77.3593	0.233852	0.268588	0.111505	0.356677	0.386001	0.171558	0.254697	0.043083		77.3593	0.286476	0.297058	0.243272	0.416502	0.471437	0.172096	0.41976	0.237954	0.318069	0.0373957
	77.8225	0.0717184	-0.022867	0.120611	0.133094	0.114135	0.0833382	0.028485		77.8225	0.238317	0.271541	0.0938691	0.353001	0.366575	0.153838	0.24619	0.0440969		77.8225	0.290088	0.302688	0.245795	0.411156	0.468903	0.175799	0.409568	0.236337	0.317542	0.0360926
	78.2858	0.0692863	-0.0200081	0.115536	0.123349	0.114213	0.0804753	0.0268587		78.2858	0.241733	0.264473	0.101216	0.34609	0.359345	0.15933	0.245365	0.0415115		78.2858	0.286737	0.30092	0.24587	0.414763	0.470876	0.172878	0.408692	0.234488	0.316903	0.0367074
	78.749	0.0611427	-0.00987029	0.110347	0.127034	0.117662	0.0812631	0.0254714		78.749	0.239678	0.268081	0.104484	0.347368	0.365025	0.155658	0.246716	0.0420933		78.749	0.285567	0.306447	0.242806	0.41067	0.469662	0.175678	0.41179	0.236134	0.317344	0.0363955
	79.2122	0.0477001	-0.0168153	0.112735	0.128596	0.11635	0.0777132	0.027518		79.2122	0.242069	0.263764	0.108597	0.348143	0.366078	0.148529	0.246197	0.0422543		79.2122	0.286236	0.31232	0.240757	0.407171	0.467569	0.170924	0.418375	0.250825	0.319272	0.0362373
	79.6754	0.0487812	-0.00837186	0.107992	0.126727	0.117587	0.0785431	0.025645		79.6754	0.245569	0.277893	0.0926733	0.340246	0.370858	0.147281	0.245753	0.0442506		79.6754	0.283198	0.307174	0.240482	0.404384	0.464227	0.172427	0.416662	0.251742	0.317537	0.0357311
	80.1387	0.039937	0.006089	0.110456	0.126777	0.118412	0.0803344	0.0241439		80.1387	0.244197	0.269109	0.106534	0.322498	0.379586	0.143747	0.244279	0.0424748		80.1387	0.277855	0.30948	0.239617	0.397289	0.464524	0.170271	0.412855	0.246119	0.314751	0.0357291
	80.6019	0.0440963	0.00517289	0.108848	0.127735	0.114841	0.0801387	0.0236779		80.6019	0.244137	0.266254	0.108672	0.326045	0.371914	0.137241	0.242377	0.0421442		80.6019	0.276435	0.30659	0.236648	0.392853	0.467144	0.167609	0.403449	0.240418	0.311393	0.0358349
	81.0651	0.0287958	-0.000897918	0.114395	0.125913	0.108763	0.0753937	0.0256696		81.0651	0.241208	0.264511	0.124154	0.318951	0.388386	0.133527	0.245123	0.0422111		81.0651	0.263557	0.308124	0.232477	0.394713	0.466066	0.16783	0.406084	0.236425	0.30941	0.0364882
	81.5284	0.0270244	0.00167665	0.113169	0.127049	0.0963085	0.0730454	0.0247779		81.5284	0.241683	0.271501	0.142248	0.317299	0.393308	0.117748	0.247298	0.0426831		81.5284	0.269436	0.307102	0.234383	0.390967	0.46362	0.165149	0.40282	0.232665	0.308268	0.0361249
	81.9916	0.0190255	-0.00708277	0.111753	0.129057	0.0905529	0.0686612	0.0266315		81.9916	0.225746	0.282587	0.13557	0.31199	0.401183	0.122434	0.246585	0.0438354		81.9916	0.260506	0.302746	0.237538	0.383659	0.461533	0.167927	0.404504	0.230327	0.306093	0.0357277
	82.4548	0.0135904	-0.0130088	0.110098	0.129386	0.0938783	0.0667888	0.0280408		82.4548	0.229312	0.276642	0.149825	0.310655	0.383289	0.11418	0.243984	0.0411695		82.4548	0.259825	0.305596	0.23252	0.381264	0.46161	0.176335	0.405833	0.228725	0.306464	0.0353957
	82.918	0.00737709	-0.0196608	0.109178	0.131475	0.0900351	0.0636809	0.0295606		82.918	0.216258	0.289253	0.158573	0.300399	0.37268	0.122475	0.243273	0.0385659		82.918	0.255876	0.308894	0.229244	0.382401	0.45421	0.179288	0.396951	0.224247	0.303889	0.0346388
	83.3813	-0.00364694	-0.0126365	0.111769	0.133522	0.0880207	0.0634055	0.0301161		83.3813	0.199387	0.280504	0.126685	0.294608	0.369896	0.127357	0.233073	0.0401604		83.3813	0.25297	0.307971	0.225971	0.377858	0.454476	0.178595	0.397574	0.225369	0.302598	0.0347069
	83.8445	0.000996187	-0.0263945	0.110005	0.132626	0.0881879	0.061084	0.0312323		83.8445	0.19502	0.280985	0.131407	0.289315	0.372595	0.125467	0.232465	0.040119		83.8445	0.252929	0.308323	0.214193	0.374797	0.45659	0.181101	0.397103	0.221213	0.300781	0.0352367
	84.3077	0.00279408	-0.0364471	0.104066	0.135161	0.0853218	0.0581791	0.0322413		84.3077	0.175445	0.272314	0.13277	0.282227	0.371599	0.123489	0.226307	0.0401086		84.3077	0.252808	0.306501	0.20971	0.376678	0.457117	0.183145	0.39303	0.216263	0.299406	0.0354324
	84.771	-0.00274684	-0.0348918	0.102987	0.136285	0.0800403	0.0563347	0.0323599		84.771	0.174933	0.278181	0.100122	0.282478	0.353421	0.134326	0.220577	0.0403441		84.771	0.251134	0.309562	0.207534	0.37299	0.454929	0.181848	0.395867	0.215836	0.298713	0.0355016
	85.2342	-0.00616467	-0.047922	0.0994939	0.134462	0.0839681	0.0527675	0.0342361		85.2342	0.179532	0.281436	0.0888805	0.284111	0.369938	0.122102	0.221	0.0442621		85.2342	0.253372	0.309085	0.203331	0.364429	0.459443	0.183105	0.390527	0.214316	0.297201	0.0354344
	85.6974	0.00320932	-0.0314471	0.0953793	0.13105	0.0816017	0.0559587	0.0302263		85.6974	0.182974	0.282278	0.084731	0.277496	0.383981	0.132744	0.224034	0.045188		85.6974	0.247674	0.31231	0.197497	0.367803	0.458836	0.183576	0.391645	0.216827	0.297021	0.0358625
	86.1607	-0.000533171	-0.0337448	0.0939013	0.131853	0.0794339	0.054182	0.0308001		86.1607	0.186538	0.273896	0.058546	0.282658	0.375234	0.120675	0.216258	0.0475734		86.1607	0.24525	0.315921	0.196232	0.370213	0.45828	0.188155	0.39189	0.216295	0.29778	0.0358373
	86.6239	-0.0115208	-0.0500781	0.0974428	0.13178	0.0771202	0.0489488	0.0342558		86.6239	0.183349	0.270678	0.045541	0.274537	0.352977	0.122952	0.208339	0.046046		86.6239	0.252053	0.306416	0.195244	0.366043	0.453295	0.187808	0.391677	0.21805	0.296323	0.0350444
	87.0871	-0.00789419	-0.0455822	0.09468	0.135916	0.0767464	0.0507732	0.033599		87.0871	0.188972	0.258843	0.060129	0.28393	0.34839	0.110139	0.208401	0.0446705		87.0871	0.249192	0.310362	0.196638	0.363658	0.455409	0.183328	0.389067	0.217736	0.295674	0.0352896
	87.5503	-0.0106738	-0.0435191	0.0932171	0.129405	0.0805783	0.0498015	0.0328138		87.5503	0.18913	0.253945	0.068578	0.261514	0.350319	0.099088	0.203762	0.043504		87.5503	0.251508	0.307219	0.192171	0.367517	0.448692	0.185246	0.386314	0.213679	0.294043	0.0349706
	88.0136	-0.00232565	-0.0449584	0.0895924	0.128167	0.0761103	0.0493171	0.0317113		88.0136	0.192885	0.253311	0.0553536	0.247924	0.350025	0.101561	0.200177	0.0440868		88.0136	0.24943	0.304612	0.188666	0.366043	0.449393	0.180436	0.389389	0.21667	0.29308	0.0354815
	88.4768	-0.00408474	-0.0429332	0.0845136	0.129846	0.0792168	0.0493117	0.0316066		88.4768	0.195015	0.247853	0.0445417	0.262967	0.337204	0.097073	0.197442	0.0446567		88.4768	0.24902	0.300935	0.185317	0.370113	0.452649	0.17813	0.379846	0.217221	0.291654	0.0357302
	88.94	-0.0195737	-0.0609985	0.0832962	0.133047	0.0741102	0.0419763	0.0356553		88.94	0.197458	0.249019	0.0417154	0.244832	0.35872	0.099306	0.198508	0.0464726		88.94	0.259511	0.296134	0.190605	0.376641	0.452081	0.179228	0.372252	0.219473	0.293241	0.0349871
	89.4033	-0.0268739	-0.0660139	0.0845397	0.124775	0.0771201	0.0387094	0.0362293		89.4033	0.20221	0.248838	0.0641329	0.250434	0.321633	0.0951046	0.197059	0.0404719		89.4033	0.263701	0.290394	0.189684	0.36831	0.451445	0.174149	0.369758	0.22165	0.291136	0.0346916
	89.8665	-0.0252257	-0.0723389	0.0875835	0.118446	0.0824432	0.0381816	0.0367949		89.8665	0.201041	0.251738	0.06419	0.243596	0.30708	0.0935649	0.193535	0.0389729		89.8665	0.270886	0.289141	0.18967	0.366446	0.44698	0.174778	0.364442	0.223992	0.290792	0.0338296
	90.3297	-0.0247029	-0.0814702	0.0864257	0.11641	0.0839147	0.0361156	0.0379397		90.3297	0.203401	0.245088	0.0412572	0.25699	0.320407	0.0898418	0.192831	0.0435186		90.3297	0.266564	0.288126	0.188461	0.362888	0.440527	0.172238	0.368228	0.225163	0.289024	0.0335457
	90.7929	-0.00940073	-0.0837468	0.0839327	0.112296	0.0828189	0.03718	0.0365405		90.7929	0.20826	0.240539	0.0432149	0.266446	0.308989	0.0856685	0.192186	0.0429311		90.7929	0.262311	0.283966	0.191556	0.360734	0.440321	0.172769	0.367907	0.221824	0.287674	0.0334106
	91.2562	-0.00950747	-0.0930681	0.0877169	0.10762	0.095628	0.0376779	0.0387782		91.2562	0.207363	0.246367	0.0237491	0.262838	0.288898	0.0864036	0.185936	0.0435268		91.2562	0.261632	0.285865	0.195869	0.354065	0.440361	0.177785	0.369035	0.221331	0.288243	0.0327121
	91.7194	-0.0105464	-0.112357	0.0868342	0.109802	0.0959254	0.0339315	0.0422947		91.7194	0.214497	0.252415	0.0305801	0.24647	0.289987	0.0862703	0.186703	0.0423443		91.7194	0.266391	0.29199	0.201316	0.35188	0.436849	0.174407	0.362468	0.219275	0.288072	0.0320172
	92.1826	-0.0106739	-0.119869	0.0835716	0.108467	0.101627	0.0326247	0.0437254		92.1826	0.234965	0.249052	0.0569961	0.255964	0.280901	0.0775564	0.192572	0.0401734		92.1826	0.266074	0.289186	0.205368	0.34909	0.43662	0.174982	0.364393	0.221987	0.288462	0.0316497
	92.6459	-0.0041152	-0.121042	0.0822924	0.108601	0.0997651	0.0331003	0.0434219		92.6459	0.242008	0.25055	0.0522169	0.252418	0.281057	0.087042	0.194215	0.0400152		92.6459	0.268985	0.289705	0.203127	0.353113	0.439398	0.179028	0.360659	0.223413	0.289679	0.0316319
	93.1091	-0.00134403	-0.116386	0.0871115	0.106118	0.103679	0.0358358	0.0428517		93.1091	0.255669	0.244876	0.0551523	0.25329	0.304773	0.0832394	0.1995	0.0422463		93.1091	0.265954	0.28504	0.19681	0.352984	0.444265	0.1829	0.35451	0.22586	0.288541	0.0318424
	93.5723	0.0128769	-0.119446	0.0848923	0.108253	0.108956	0.0391064	0.0433494		93.5723	0.247796	0.248272	0.0569788	0.251858	0.264764	0.0775861	0.191209	0.0393594		93.5723	0.260798	0.290117	0.195069	0.348729	0.444662	0.189773	0.35625	0.224767	0.288771	0.0315979
	94.0356	0.0158799	-0.130389	0.0874155	0.108559	0.111042	0.0385015	0.0456062		94.0356	0.249535	0.258113	0.0468967	0.249135	0.285496	0.0808758	0.195008	0.0420461		94.0356	0.262509	0.291904	0.190316	0.350596	0.448006	0.194729	0.359012	0.226446	0.29044	0.0319629
	94.4988	0.0232357	-0.128731	0.0866883	0.107506	0.115744	0.0408885	0.0453989		94.4988	0.239821	0.258348	0.0331857	0.240647	0.282973	0.0817636	0.189456	0.0426875		94.4988	0.261351	0.29259	0.183789	0.345093	0.445578	0.193828	0.356989	0.227822	0.28838	0.0318842
	94.962	0.0259322	-0.14335	0.0899447	0.105353	0.125829	0.0407418	0.0489613		94.962	0.237277	0.257733	0.0315391	0.238239	0.273771	0.0702072	0.184794	0.042998		94.962	0.2597	0.289204	0.184628	0.352121	0.44335	0.19243	0.356548	0.22687	0.288106	0.0319885
	95.4252	0.0214376	-0.136569	0.0850933	0.107483	0.128698	0.0412284	0.0479418		95.4252	0.231273	0.260893	0.045533	0.245962	0.267286	0.075204	0.187692	0.0407639		95.4252	0.257181	0.284453	0.181585	0.342106	0.446478	0.183069	0.356643	0.222337	0.284231	0.0328007
	95.8885	0.0211533	-0.143284	0.0825969	0.102672	0.127364	0.0381006	0.0486338		95.8885	0.220266	0.258266	0.0337911	0.246605	0.292308	0.0755036	0.18779	0.0434851		95.8885	0.260646	0.281595	0.179491	0.340987	0.443669	0.184556	0.358099	0.218408	0.283432	0.0327039
	96.3517	0.0235046	-0.134261	0.0807314	0.103491	0.123776	0.0394484	0.0465543		96.3517	0.21585	0.253351	0.0432522	0.229003	0.288952	0.0798444	0.185042	0.0406268		96.3517	0.255045	0.278264	0.177639	0.343328	0.446129	0.184505	0.347117	0.219485	0.281439	0.0327279
	96.8149	0.0179259	-0.123231	0.0842005	0.105172	0.13001	0.0428156	0.0454944		96.8149	0.210972	0.247687	0.0329604	0.234541	0.282678	0.07826	0.181183	0.0412397		96.8149	0.257421	0.276049	0.176333	0.339427	0.443237	0.182906	0.348155	0.217263	0.280099	0.0325847
	97.2782	0.0160977	-0.134409	0.0875245	0.105751	0.119053	0.0388034	0.0468048		97.2782	0.206338	0.244467	-0.0177473	0.224734	0.293899	0.0752169	0.171151	0.0481101		97.2782	0.25945	0.275219	0.173274	0.344529	0.445697	0.186459	0.345399	0.213034	0.280383	0.032995
	97.7414	0.000340913	-0.115108	0.0870534	0.104659	0.107168	0.0368226	0.0427125		97.7414	0.200334	0.246323	-0.000644767	0.221339	0.311936	0.0731584	0.175408	0.0475568		97.7414	0.255832	0.271541	0.171789	0.337637	0.443453	0.187977	0.345562	0.21244	0.278279	0.0326539
	98.2046	-0.00433934	-0.123942	0.0861352	0.106554	0.0973045	0.0323425	0.043813		98.2046	0.200925	0.243511	-0.00109788	0.225559	0.32668	0.0832817	0.17981	0.048378		98.2046	0.260655	0.278497	0.17262	0.335914	0.441196	0.186218	0.337496	0.206889	0.277436	0.0322963
	98.6678	-0.0149291	-0.140913	0.0866804	0.103186	0.0950774	0.0258202	0.0468757		98.6678	0.191358	0.239787	-0.00955191	0.207944	0.349111	0.0838222	0.177078	0.0510593		98.6678	0.254698	0.276972	0.173471	0.334031	0.439826	0.185649	0.328969	0.204336	0.274744	0.0319781
	99.1311	-0.0113434	-0.139299	0.0830257	0.10638	0.0912821	0.0260091	0.0462023		99.1311	0.188569	0.237264	-0.0135487	0.223176	0.349769	0.0768437	0.177012	0.052309		99.1311	0.256255	0.274589	0.176083	0.33343	0.437339	0.174809	0.328065	0.203825	0.273049	0.0321252
	99.5943	-0.0176703	-0.134898	0.0868724	0.10709	0.0892571	0.0261303	0.0458681		99.5943	0.196587	0.229395	0.000696725	0.209666	0.337938	0.0775025	0.175298	0.0486697		99.5943	0.253651	0.275215	0.17591	0.33313	0.437877	0.178514	0.321955	0.204841	0.272637	0.0317846
	100.058	-0.0247674	-0.130081	0.0835122	0.108483	0.0836524	0.0241598	0.0449203		100.058	0.188793	0.232334	-0.00892312	0.206863	0.342814	0.0728374	0.172453	0.0506229		100.058	0.246523	0.274207	0.170795	0.33424	0.43386	0.179339	0.313816	0.20219	0.269371	0.0316571
	100.521	-0.0365596	-0.142286	0.0841859	0.108748	0.0817965	0.019177	0.0476168		100.521	0.196813	0.239706	-0.00203077	0.197549	0.339551	0.0679458	0.173256	0.0500102		100.521	0.250494	0.276074	0.169783	0.335926	0.431101	0.176875	0.312559	0.204588	0.269675	0.0314876
	100.984	-0.0401172	-0.150025	0.0810641	0.108267	0.0791153	0.0156608	0.0487046		100.984	0.189612	0.24073	0.0189373	0.182074	0.340251	0.068222	0.173305	0.0474804		100.984	0.251145	0.269952	0.171576	0.334586	0.429246	0.182514	0.311659	0.205858	0.269567	0.0307859
	101.447	-0.0421407	-0.159168	0.0811105	0.113965	0.0781055	0.0143744	0.0508649		101.447	0.183203	0.24051	-0.00378498	0.178442	0.327246	0.0675843	0.165533	0.0484816		101.447	0.24439	0.273345	0.174653	0.323203	0.427883	0.18962	0.311637	0.212069	0.2696	0.0296
	101.91	-0.0360191	-0.162328	0.0804442	0.111988	0.0718368	0.0131843	0.0504736		101.91	0.174906	0.245575	-0.00299169	0.183136	0.342097	0.07351	0.169372	0.0499199		101.91	0.249766	0.272121	0.177903	0.322974	0.428886	0.186456	0.314717	0.207944	0.270096	0.0298139
	102.374	-0.0329633	-0.156559	0.0837919	0.109959	0.0812314	0.017092	0.0499235		102.374	0.172749	0.244489	0.0140446	0.187225	0.327109	0.0740844	0.16995	0.0462089		102.374	0.247439	0.266997	0.180274	0.322572	0.425688	0.185067	0.312012	0.20791	0.268495	0.0293947
	102.837	-0.0314831	-0.162561	0.0816492	0.10958	0.0829149	0.0160198	0.0508347		102.837	0.171874	0.24177	0.0110797	0.19019	0.32065	0.0732908	0.168142	0.0457694		102.837	0.243335	0.268726	0.178412	0.327283	0.423864	0.189184	0.310614	0.208796	0.268777	0.0292682
	103.3	-0.0280351	-0.159355	0.0827086	0.114863	0.07671	0.0173783	0.0502934		103.3	0.183287	0.253341	0.0313664	0.19541	0.342298	0.0660234	0.178621	0.047272		103.3	0.237053	0.274333	0.179336	0.326611	0.419387	0.191249	0.309824	0.214497	0.269036	0.0285689
	103.763	-0.0355829	-0.16345	0.0774151	0.117372	0.0732717	0.0138051	0.0510721		103.763	0.184147	0.23734	0.0326861	0.194973	0.339658	0.0667902	0.175933	0.045985		103.763	0.231087	0.280896	0.18102	0.329087	0.422281	0.196174	0.310651	0.221604	0.2716	0.028553
	104.227	-0.0324252	-0.162198	0.0733154	0.122138	0.0843221	0.0170304	0.0516297		104.227	0.193148	0.22576	0.0533984	0.203883	0.31966	0.0609478	0.176133	0.0418146		104.227	0.2277	0.293291	0.176172	0.327016	0.413448	0.200952	0.308305	0.220625	0.270938	0.0279122
	104.69	-0.0245304	-0.154618	0.0753456	0.111688	0.104653	0.0225076	0.0505365		104.69	0.195077	0.238221	0.060671	0.200267	0.316336	0.0805138	0.181848	0.039468		104.69	0.21767	0.304145	0.175206	0.327154	0.411896	0.195771	0.302499	0.227786	0.270266	0.0282333
	105.153	-0.0338996	-0.157736	0.0686117	0.113056	0.131027	0.0242119	0.0537382		105.153	0.206259	0.23683	0.0528476	0.208622	0.336198	0.074256	0.185835	0.0433134		105.153	0.21483	0.297025	0.168938	0.323939	0.408148	0.197095	0.298961	0.229737	0.267334	0.0279349
	105.616	-0.0472822	-0.147993	0.061885	0.111731	0.129422	0.0215525	0.0523825		105.616	0.227269	0.234573	0.0818909	0.209921	0.329333	0.0744521	0.192906	0.0400726		105.616	0.209383	0.275314	0.167181	0.327962	0.40509	0.192396	0.301899	0.228968	0.263524	0.0281169
	106.08	-0.0447404	-0.155504	0.0642215	0.111227	0.0981263	0.014666	0.0506124		106.08	0.225543	0.229636	0.0541146	0.197957	0.318718	0.0741648	0.183356	0.0412649		106.08	0.211731	0.263868	0.160932	0.327522	0.399503	0.188163	0.301537	0.230193	0.260431	0.0280154
	106.543	-0.0503208	-0.155241	0.0633199	0.112075	0.0792295	0.00981254	0.0494966		106.543	0.219402	0.231798	0.0908631	0.201735	0.33207	0.0704904	0.19106	0.0395967		106.543	0.208353	0.264927	0.156888	0.32666	0.395834	0.190523	0.296672	0.226422	0.258285	0.0278689
	107.006	-0.0531236	-0.152251	0.0598801	0.115063	0.0891082	0.0117353	0.0500397		107.006	0.222457	0.230733	0.08226	0.20334	0.337219	0.0677794	0.190631	0.0412745		107.006	0.211382	0.258333	0.155664	0.323091	0.394317	0.195512	0.296112	0.224309	0.25734	0.0273711
	107.469	-0.04569	-0.154001	0.0589826	0.113773	0.0891309	0.0124391	0.0496981		107.469	0.216929	0.232807	0.0906931	0.201777	0.322631	0.0607556	0.187599	0.0395047		107.469	0.208491	0.264624	0.150317	0.315504	0.390374	0.198322	0.298676	0.224618	0.256366	0.0271337
	107.932	-0.0432228	-0.149976	0.0603202	0.108967	0.0914792	0.0135135	0.0486461		107.932	0.225346	0.228377	0.10313	0.197169	0.329775	0.07249	0.192714	0.0381319		107.932	0.211373	0.261357	0.146881	0.319583	0.390988	0.191841	0.299321	0.221086	0.255304	0.0278388
	108.396	-0.0363401	-0.14509	0.0618776	0.110655	0.0957071	0.0173619	0.0480092		108.396	0.217131	0.228582	0.101345	0.1981	0.32169	0.0831417	0.191665	0.0360066		108.396	0.209831	0.257519	0.145143	0.325292	0.391463	0.179888	0.304254	0.219245	0.254079	0.028976
	108.859	-0.0403785	-0.142492	0.0638987	0.103679	0.0967736	0.0162961	0.0473307		108.859	0.211471	0.216418	0.108903	0.212907	0.31941	0.0680897	0.189533	0.0364547		108.859	0.207957	0.257384	0.145171	0.326071	0.398558	0.173354	0.307236	0.213132	0.253608	0.0301997
	109.322	-0.0376058	-0.117211	0.0654336	0.10215	0.100935	0.0227404	0.0432845		109.322	0.210598	0.223859	0.135437	0.204431	0.292652	0.0628103	0.188298	0.0323797		109.322	0.207486	0.258658	0.144128	0.329068	0.390809	0.163384	0.309871	0.211199	0.251826	0.030395
	109.785	-0.0406036	-0.110706	0.0618524	0.0927626	0.0996255	0.0205862	0.0413166		109.785	0.213676	0.2284	0.137029	0.210084	0.286618	0.0608923	0.18945	0.032273		109.785	0.210778	0.252547	0.141822	0.338208	0.382626	0.156851	0.311979	0.205857	0.250083	0.0307886
	110.249	-0.047365	-0.0966531	0.0594034	0.0890411	0.095467	0.0199787	0.0388333		110.249	0.212673	0.223846	0.123791	0.217933	0.289966	0.0518847	0.186682	0.0345574		110.249	0.211424	0.250183	0.141836	0.341749	0.378868	0.157504	0.311271	0.204292	0.249641	0.0306508
	110.712	-0.0493961	-0.0855386	0.0573214	0.0842477	0.0968694	0.0207008	0.0370009		110.712	0.209253	0.211733	0.0949734	0.213257	0.29504	0.0497328	0.178998	0.0366951		110.712	0.17435	0.249306	0.144747	0.336928	0.384246	0.146547	0.299008	0.202318	0.242181	0.031979
	111.175	-0.0592736	-0.0696885	0.0560396	0.0730285	0.0970322	0.0194276	0.0349081		111.175	0.215659	0.215965	0.106588	0.204611	0.286904	0.0568645	0.181098	0.0342265		111.175	0.1758	0.252199	0.148429	0.336904	0.384716	0.140549	0.300885	0.198024	0.242188	0.0322684
	111.638	-0.0605157	-0.0676743	0.0545839	0.0721069	0.0895953	0.0176192	0.0338348		111.638	0.214472	0.208664	0.0872353	0.207052	0.280589	0.0584025	0.176069	0.0347172		111.638	0.183704	0.252737	0.152151	0.345622	0.38527	0.137256	0.29158	0.201822	0.243768	0.0321462
	112.101	-0.0586419	-0.0668251	0.0471255	0.0746019	0.0819682	0.0156457	0.0325466		112.101	0.217866	0.208508	0.0782264	0.201653	0.294434	0.0617902	0.177079	0.0365562		112.101	0.184856	0.249576	0.15136	0.342332	0.38229	0.129278	0.286633	0.198859	0.240648	0.0321356
	112.565	-0.0605784	-0.0662491	0.0456907	0.0722368	0.0775654	0.0137331	0.0319671		112.565	0.221729	0.202542	0.0725259	0.198564	0.290547	0.0583553	0.174044	0.0369459		112.565	0.191967	0.24918	0.152349	0.345011	0.38432	0.13015	0.286512	0.1956	0.241886	0.0322111
	113.028	-0.070336	-0.0750558	0.0465649	0.0698076	0.0800165	0.0101994	0.0342815		113.028	0.213835	0.199865	0.0873233	0.18974	0.295054	0.0544344	0.173375	0.036039		113.028	0.195546	0.240556	0.153704	0.338976	0.38747	0.12628	0.283024	0.193672	0.239903	0.0321538
	113.491	-0.0708977	-0.0616881	0.0459473	0.0686589	0.0708916	0.0105824	0.0317197		113.491	0.211441	0.199843	0.0763515	0.195098	0.292659	0.0614176	0.172802	0.0359611		113.491	0.197879	0.235077	0.156547	0.331872	0.383762	0.120955	0.280236	0.187184	0.236689	0.0317252
	113.954	-0.0749787	-0.0589492	0.0416371	0.0671577	0.0647254	0.00791845	0.0309971		113.954	0.21097	0.193821	0.0723344	0.1936	0.312231	0.0579588	0.173486	0.038752		113.954	0.198864	0.232467	0.15779	0.324996	0.384946	0.116204	0.278362	0.185663	0.234911	0.0317028
	114.418	-0.0794205	-0.0650133	0.0475537	0.0602069	0.0653054	0.00572644	0.0320323		114.418	0.207858	0.18508	0.0627376	0.194013	0.292312	0.0518664	0.165644	0.0376583		114.418	0.200444	0.241634	0.15954	0.318672	0.381866	0.112853	0.280119	0.175798	0.233866	0.0316096
	114.881	-0.0749502	-0.0744891	0.0474992	0.0537576	0.0702973	0.00442295	0.0325239		114.881	0.201787	0.187105	0.085556	0.181133	0.280017	0.0503617	0.164327	0.0340498		114.881	0.200733	0.236225	0.155605	0.316023	0.385761	0.105081	0.274335	0.179191	0.231619	0.0322441
	115.344	-0.0674532	-0.0839738	0.0481536	0.055068	0.0720809	0.00477511	0.0331922		115.344	0.204007	0.197914	0.0677485	0.177325	0.303334	0.0527645	0.167182	0.0382619		115.344	0.201287	0.237029	0.156778	0.312643	0.384163	0.107376	0.27254	0.183219	0.231879	0.031577
	115.807	-0.0648761	-0.0821592	0.0469421	0.0545304	0.0823759	0.00736262	0.0336533		115.807	0.162965	0.190147	0.0482584	0.172047	0.288628	0.0558284	0.152979	0.0368103		115.807	0.20183	0.242929	0.154006	0.310204	0.384862	0.100544	0.278578	0.184997	0.232244	0.032253
	116.271	-0.0648449	-0.0949684	0.0449763	0.0463491	0.0800995	0.0023223	0.0344847		116.271	0.163966	0.184226	0.0361532	0.161607	0.285685	0.0499308	0.146928	0.0377844		116.271	0.192062	0.244123	0.149319	0.304331	0.383609	0.0994595	0.279655	0.187954	0.230064	0.0323329
	116.734	-0.065675	-0.0929047	0.0442812	0.0448573	0.0772443	0.00156059	0.0338171		116.734	0.160031	0.184239	0.0391143	0.168112	0.298321	0.0421212	0.148656	0.0398006		116.734	0.193933	0.254235	0.142511	0.311815	0.380656	0.0971084	0.276154	0.189425	0.230729	0.0328323
	117.197	-0.0677038	-0.0996259	0.0430548	0.0476869	0.0687659	-0.00156444	0.0341712		117.197	0.171778	0.188647	0.0304803	0.167779	0.271471	0.0505636	0.146787	0.0370359		117.197	0.189738	0.250541	0.139176	0.306783	0.377614	0.0934498	0.276128	0.196467	0.228737	0.0326953
	117.66	-0.0666326	-0.0945692	0.0427566	0.0430855	0.0675589	-0.00156014	0.0328784		117.66	0.176275	0.193532	-0.00253397	0.158821	0.294703	0.047563	0.144727	0.0436636		117.66	0.18817	0.241539	0.136986	0.302825	0.377362	0.0883557	0.278826	0.210088	0.228019	0.0328323
	118.123	-0.0687198	-0.101318	0.0451743	0.03725	0.0636931	-0.00478412	0.0334354		118.123	0.17926	0.205228	0.000853186	0.152377	0.252605	0.0448254	0.139191	0.0396002		118.123	0.195256	0.243586	0.135293	0.308313	0.377384	0.0898355	0.277765	0.217028	0.230557	0.032817
	118.587	-0.0666484	-0.0885454	0.0409381	0.0352439	0.0681263	-0.00217711	0.0314784		118.587	0.170022	0.212912	0.00281455	0.150465	0.25179	0.0464979	0.139084	0.0393198		118.587	0.197176	0.235691	0.134614	0.312309	0.370373	0.0895841	0.276246	0.218395	0.229298	0.0323688
	119.05	-0.0577161	-0.0803226	0.0444351	0.0434184	0.066885	0.00333996	0.0300502		119.05	0.170488	0.211388	0.00258397	0.152698	0.24476	0.0460148	0.137989	0.0386668		119.05	0.195584	0.23312	0.137457	0.307494	0.361214	0.0909515	0.273743	0.217596	0.227145	0.0311441
	119.513	-0.0472307	-0.0737769	0.0420298	0.0422635	0.0716721	0.00699157	0.0283892		119.513	0.180194	0.200043	-0.00740781	0.146811	0.242647	0.0408718	0.13386	0.039637		119.513	0.192084	0.234729	0.141097	0.303644	0.360437	0.0914669	0.273022	0.218467	0.226868	0.0307344
	119.976	-0.0548137	-0.0847392	0.0403071	0.0431141	0.0614397	0.00106159	0.0295279		119.976	0.1783	0.206235	-0.00623318	0.142023	0.260964	0.0438709	0.137526	0.0412628		119.976	0.187672	0.232186	0.147065	0.303514	0.358132	0.0927441	0.272496	0.22258	0.227049	0.0302156
	120.44	-0.0590745	-0.0992309	0.0554045	0.0399673	0.0639037	0.000194023	0.0332318		120.44	0.180778	0.199944	0.00186225	0.14498	0.279396	0.0407487	0.141285	0.0422829		120.44	0.180888	0.231174	0.153604	0.303461	0.357529	0.0984031	0.274594	0.221291	0.227618	0.0296548
	120.903	-0.0644386	-0.100004	0.0523283	0.0414404	0.0628602	-0.0015628	0.0335767		120.903	0.171488	0.220689	0.0257679	0.145311	0.276965	0.0272423	0.144577	0.0416043		120.903	0.171709	0.229222	0.157091	0.302023	0.354759	0.103482	0.275113	0.220258	0.226707	0.0291291
	121.366	-0.0658987	-0.1048	0.051363	0.0389456	0.056695	-0.00473907	0.0336026		121.366	0.164037	0.221627	0.0234354	0.192824	0.254701	0.0288704	0.147582	0.0403235		121.366	0.164764	0.223515	0.165946	0.295377	0.350957	0.107696	0.276528	0.220015	0.2256	0.0281492
	121.829	-0.0549672	-0.117047	0.0544656	0.0655839	0.0587705	0.00136125	0.0370363		121.829	0.172002	0.232287	0.0104882	0.19214	0.248066	0.0259598	0.146824	0.0422046		121.829	0.1619	0.231055	0.195871	0.294968	0.347155	0.105378	0.27407	0.214251	0.228081	0.0272033
	122.293	-0.054532	-0.134343	0.050136	0.0637743	0.0633606	-0.00232079	0.039743		122.293	0.161323	0.23553	-0.00319041	0.197607	0.226603	0.0226513	0.140087	0.0426902		122.293	0.160049	0.229723	0.24943	0.289346	0.341676	0.103246	0.278451	0.214829	0.233344	0.0266656
	122.756	-0.0447002	-0.14291	0.0503515	0.0639197	0.0574627	-0.00317524	0.0401833		122.756	0.154873	0.23872	0.0270408	0.186821	0.211595	0.0148392	0.138981	0.0390315		122.756	0.153608	0.227658	0.264943	0.287529	0.340102	0.103306	0.279969	0.212411	0.233691	0.0271381
	123.219	-0.0407919	-0.146582	0.0541481	0.0540212	0.0542961	-0.00498161	0.0398901		123.219	0.146615	0.226311	0.0264256	0.176224	0.226553	0.0143891	0.136086	0.0386791		123.219	0.153136	0.232099	0.217773	0.282934	0.340525	0.103004	0.277955	0.20474	0.226521	0.0267424
	123.682	-0.0376389	-0.152873	0.0597112	0.0608449	0.0671804	-0.000554976	0.0427586		123.682	0.131976	0.219571	0.0329081	0.179489	0.255122	0.0098142	0.138147	0.0406632		123.682	0.150237	0.236091	0.189898	0.286849	0.3471	0.104191	0.276434	0.201124	0.223991	0.0278646
	124.145	-0.0301119	-0.147081	0.054999	0.0553547	0.0666937	-2.91579e-05	0.0406674		124.145	0.122661	0.230863	0.0301298	0.185778	0.25744	-0.00562591	0.136874	0.0438423		124.145	0.147169	0.235323	0.178151	0.278591	0.345239	0.100908	0.276234	0.195006	0.219578	0.0281503
	124.609	-0.0320115	-0.157373	0.0557448	0.0547641	0.0702541	-0.00172421	0.0429058		124.609	0.129547	0.227663	0.0394325	0.276547	0.242275	0.0140498	0.154919	0.0452921		124.609	0.147917	0.234711	0.176054	0.277662	0.350339	0.103422	0.266158	0.192114	0.218547	0.0280748
	125.072	-0.0259042	-0.167578	0.0499482	0.0582141	0.0848032	-0.000103382	0.0457322		125.072	0.117571	0.210394	0.0258862	0.291996	0.230516	0.0068131	0.147196	0.0473302		125.072	0.140789	0.234213	0.138692	0.28199	0.348407	0.106454	0.265689	0.186658	0.212862	0.0296114
	125.535	-0.0255285	-0.170742	0.0426605	0.0486419	0.0964265	-0.00170825	0.0465155		125.535	0.11284	0.222494	0.0281446	0.266636	0.270098	-0.000632257	0.14993	0.0490586		125.535	0.138838	0.233693	0.135613	0.280994	0.343216	0.111819	0.264446	0.187127	0.211968	0.0289833
	125.998	-0.0340251	-0.171359	0.0431191	0.0493507	0.0966527	-0.00325233	0.0469602		125.998	0.128654	0.228905	0.00613818	0.257509	0.252083	0.00868744	0.146996	0.0480528		125.998	0.135064	0.236584	0.135823	0.287821	0.341118	0.115353	0.263026	0.187542	0.212791	0.0290578
	126.462	-0.0416081	-0.174563	0.034787	0.051666	0.0940122	-0.00714115	0.0472579		126.462	0.110285	0.2188	-0.0118905	0.269598	0.205311	-0.000127326	0.131996	0.0484684		126.462	0.130113	0.23746	0.130024	0.292181	0.334557	0.121846	0.265703	0.188663	0.212569	0.0289941
	126.925	-0.0538238	-0.171602	0.0392114	0.047521	0.0986349	-0.00801177	0.0477221		126.925	0.104694	0.235032	0.00399124	0.284788	0.224801	0.00522333	0.143088	0.0500128		126.925	0.131531	0.234036	0.133803	0.294891	0.331641	0.126021	0.263575	0.183498	0.212375	0.0283864
	127.388	-0.0652532	-0.177108	0.0381827	0.0436969	0.10753	-0.0105903	0.0499974		127.388	0.113762	0.233464	0.0143265	0.294407	0.259805	0.011608	0.154562	0.051194		127.388	0.132515	0.237363	0.132122	0.297185	0.33886	0.132554	0.26611	0.18006	0.214596	0.0289388
	127.851	-0.0687588	-0.187715	0.0306843	0.0392782	0.102428	-0.0168166	0.0507576		127.851	0.106813	0.221011	0.0295507	0.282097	0.245329	0.0027176	0.14792	0.048173		127.851	0.131716	0.244991	0.145808	0.296205	0.341155	0.130293	0.260795	0.177121	0.21601	0.0286081
	128.315	-0.0758186	-0.19339	0.0336058	0.0416299	0.106697	-0.0174552	0.0528541		128.315	0.0976381	0.227753	0.0213591	0.267419	0.279793	0.00880261	0.150461	0.0503007		128.315	0.134702	0.242963	0.1591	0.293542	0.339895	0.138804	0.249029	0.178724	0.217095	0.0268483
	128.778	-0.0794421	-0.183974	0.0305748	0.0499964	0.114274	-0.0137144	0.0527779		128.778	0.0826684	0.225361	0.023231	0.255171	0.256756	-0.00244952	0.140123	0.048784		128.778	0.131136	0.249023	0.175308	0.301988	0.336244	0.141874	0.243961	0.178423	0.219745	0.0265172
	129.241	-0.0944045	-0.188071	0.027858	0.0442113	0.12155	-0.0177712	0.0548676		129.241	0.0947648	0.213563	0.0397901	0.263616	0.253219	0.00626565	0.145203	0.0459426		129.241	0.133478	0.24628	0.189086	0.302355	0.340178	0.150807	0.246052	0.177698	0.223242	0.0258876
	129.704	-0.0911655	-0.181189	0.0280436	0.0445334	0.132675	-0.0134205	0.0550511		129.704	0.0926971	0.201617	0.0568441	0.271661	0.252384	-0.00676671	0.144739	0.0463032		129.704	0.133885	0.242181	0.200267	0.306267	0.338214	0.152471	0.237777	0.181463	0.224066	0.0253345
	130.167	-0.0954098	-0.190892	0.0210856	0.0446773	0.13794	-0.0165199	0.0572915		130.167	0.0986584	0.217258	0.0474788	0.267648	0.261413	-0.010592	0.146977	0.0481869		130.167	0.134077	0.249414	0.213484	0.3111	0.369748	0.156801	0.240402	0.181979	0.232126	0.0279329
	130.631	-0.112009	-0.205128	0.0293458	0.0527364	0.143682	-0.0182744	0.0621452		130.631	0.0999662	0.199416	0.033764	0.249688	0.280985	-0.0116708	0.142025	0.0487534		130.631	0.134059	0.247262	0.22641	0.306794	0.373406	0.152469	0.239819	0.190063	0.233785	0.027892
	131.094	-0.110504	-0.218724	0.0296657	0.0577381	0.143822	-0.0196005	0.0644318		131.094	0.116184	0.19334	0.0611606	0.230189	0.294117	-0.0106798	0.147385	0.0461488		131.094	0.138201	0.239099	0.233426	0.307361	0.377825	0.147954	0.235168	0.196441	0.234434	0.0280579
	131.557	-0.119548	-0.223983	0.0277063	0.0647386	0.146206	-0.0209761	0.0665564		131.557	0.107406	0.185572	0.0709654	0.22495	0.318177	-0.0126653	0.149068	0.0481948		131.557	0.139819	0.240437	0.237769	0.301923	0.375666	0.141297	0.23837	0.196132	0.233927	0.0279205
	132.02	-0.126792	-0.222565	0.0326363	0.0694901	0.148812	-0.0196837	0.0677175		132.02	0.100577	0.201193	0.0466112	0.233374	0.334326	-0.011296	0.150797	0.0525015		132.02	0.142243	0.241546	0.239768	0.299108	0.37112	0.132117	0.234603	0.202163	0.232833	0.0276889
	132.484	-0.126904	-0.226495	0.0345963	0.0726861	0.153594	-0.0185046	0.0691967		132.484	0.107365	0.186385	0.0239863	0.219667	0.328371	-0.0077723	0.143	0.0517329		132.484	0.145926	0.248016	0.247123	0.299468	0.366903	0.123217	0.237832	0.198877	0.23342	0.0279008
	132.947	-0.126518	-0.230581	0.0347838	0.0723237	0.151177	-0.0197627	0.0694682		132.947	0.103163	0.183276	0.0331214	0.214919	0.297829	-0.0132922	0.136503	0.0478194		132.947	0.14365	0.243024	0.255412	0.302988	0.367336	0.122097	0.236965	0.205938	0.234676	0.0282071
	133.41	-0.132443	-0.23479	0.0396069	0.0751121	0.146968	-0.0211093	0.0704449		133.41	0.104021	0.182539	0.0109256	0.239399	0.274527	-0.0155004	0.132652	0.048853		133.41	0.138879	0.242634	0.269769	0.296601	0.361746	0.114532	0.235316	0.20628	0.23322	0.0285601
	133.873	-0.13185	-0.227254	0.0404357	0.0723065	0.128576	-0.0235572	0.0669511		133.873	0.094029	0.173222	0.00200371	0.244916	0.234365	-0.0149987	0.122256	0.0462989		133.873	0.142216	0.23752	0.282239	0.299922	0.357493	0.109631	0.239261	0.206545	0.234353	0.0288494
	134.337	-0.126981	-0.242977	0.0425683	0.074903	0.126687	-0.0251599	0.0690901		134.337	0.0564234	0.166545	-0.0140242	0.231011	0.207474	-0.024656	0.103795	0.0460057		134.337	0.141732	0.241567	0.290006	0.292371	0.356494	0.113493	0.238489	0.200282	0.234304	0.0285974
	134.8	-0.122982	-0.247551	0.0387993	0.0816629	0.11993	-0.0260282	0.0691289		134.8	0.0757371	0.161063	0.129271	0.249411	0.195452	-0.0372997	0.128939	0.0410021		134.8	0.140599	0.240853	0.296307	0.290023	0.353066	0.110868	0.240179	0.167245	0.229892	0.0297276
	135.263		-0.239146	0.0384084	0.0766061	0.111202	-0.00323233	0.0800305		135.263	0.0606649	0.171306	0.126234	0.228717	0.1935	-0.0347737	0.124275	0.0396899		135.263		0.246205	0.30147	0.288165	0.357863	0.108451	0.242224	0.169779	0.24488	0.0316615
	135.726		-0.188829	0.0401194	0.0827512	0.106419	0.0101152	0.0677185		135.726	0.0525749	0.166628	0.123039	0.224827	0.207342	-0.0314555	0.123826	0.0400823		135.726		0.2498	0.307926	0.285956	0.349284	0.107125	0.240905	0.170774	0.244539	0.0312705
	136.189		-0.173034	0.0330233	0.0816265	0.100326	0.0104856	0.0627957		136.189	0.0592162	0.182487	0.111152	0.22417	0.148921	-0.056693	0.111542	0.0408887		136.189		0.244113	0.306382	0.284628	0.347328	0.107027	0.232651	0.169984	0.241731	0.0310727
	136.653		-0.184661	0.0366762	0.085271	0.102107	0.00984821	0.0663035		136.653	0.0513673	0.184087	0.0608545	0.247579	0.14506	-0.0650648	0.103981	0.0454348		136.653		0.240033	0.300335	0.279414	0.346451	0.108126	0.230306	0.173962	0.239804	0.0302258
	137.116		-0.21709	0.0355127	0.0779353	0.105815	0.00054339	0.07397		137.116	0.0317567	0.187242	0.0470082	0.244072	0.179383	-0.061042	0.104737	0.0475867		137.116		0.236871	0.297691	0.273737	0.347556	0.109836	0.225235	0.174503	0.237919	0.0298667
	137.579		-0.208492	0.0330696	0.0627243	0.0889831	-0.00592877	0.0684801		137.579	0.043658	0.185435	0.0521532	0.241079	0.210251	-0.0677916	0.110797	0.0490836		137.579		0.241307	0.304231	0.265934	0.350621	0.106304	0.218512	0.178346	0.237893	0.0305285
	138.042		-0.196676	0.0327727	0.0637878	0.0843357	-0.0039449	0.0651118		138.042	0.0357574	0.180672	0.0116085	0.237184	0.203582	-0.0595599	0.101541	0.0494779		138.042		0.237157	0.305537	0.256011	0.35315	0.096451	0.218605	0.178562	0.235068	0.0316344
	138.506		-0.180983	0.0392425	0.0581987	0.0774513	-0.0015227	0.0603265		138.506	0.0391967	0.18216	0.0486264	0.222847	0.219074	-0.0555365	0.109394	0.0469107		138.506		0.236824	0.303042	0.25118	0.346613	0.0911964	0.217642	0.179018	0.232216	0.0314009
	138.969		-0.175177	0.0370642	0.0487378	0.0663778	-0.00574921	0.0567962		138.969	0.0381853	0.177913	0.00167079	0.222239	0.216144	-0.0598743	0.0993797	0.0495141		138.969		0.243578	0.297351	0.24608	0.344985	0.08791	0.217054	0.178552	0.230787	0.0313203
	139.432		-0.155234	0.0355235	0.0499833	0.0545662	-0.00379018	0.050644		139.432	0.0263403	0.185685	0.0278817	0.23109	0.230044	-0.0515608	0.108247	0.0498756		139.432		0.249311	0.293296	0.240916	0.34795	0.0846861	0.215928	0.177925	0.230002	0.0317867
	139.895		-0.119542	0.0337115	0.0395001	0.0534504	0.00177999	0.0406523		139.895	0.0357867	0.181189	-0.0114855	0.19626	0.226547	-0.0528936	0.0959005	0.0488875		139.895		0.250559	0.285884	0.236652	0.345483	0.0785263	0.213202	0.173075	0.226197	0.0321055
	140.358		-0.0979348	0.0252474	0.0365284	0.0484124	0.00306334	0.0339966		140.358	0.0415633	0.186973	0.00714518	0.186171	0.247171	-0.0518516	0.102862	0.0488861		140.358		0.248251	0.275331		0.351897	0.0772198	0.220534	0.182048	0.22588	0.0378047
	140.822		-0.0702794	0.0212282	0.0369441	0.0523843	0.0100693	0.0275276		140.822	0.0403537	0.184698	0.00668521	0.188778	0.23243	-0.0577347	0.0992017	0.048213		140.822		0.237962	0.267685		0.351699	0.0754487	0.219431	0.186278	0.223084	0.0373794
	141.285		-0.0789694	0.0168442	0.0431549	0.0496268	0.00766413	0.0297351		141.285	0.0454857	0.182046	-0.0151594	0.227716	0.203925	-0.0552328	0.0981302	0.0497169		141.285		0.242408	0.261965		0.350591	0.0770847	0.209983	0.182856	0.220815	0.0370666
	141.748		-0.0876804	0.012494	0.0382829	0.0536959	0.00419807	0.0317835		141.748	0.0595318	0.19173	-0.052385	0.236099	0.211674	-0.0466803	0.0999949	0.0534735		141.748		0.2464	0.265612		0.349007	0.0740824	0.207919	0.185597	0.221436	0.0374296
	142.211		-0.0890504	0.0101646	0.0371806	0.0497905	0.00202133	0.0314622		142.211	0.0566991	0.194238	-0.0270182	0.215183	0.217176	-0.0570885	0.0998648	0.051174		142.211		0.245914	0.255058		0.340445	0.0775708	0.210429	0.188235	0.219609	0.0354933
	142.675		-0.115526	0.00814866	0.0406299	0.0508981	-0.00396245	0.0382877		142.675	0.0651504	0.179968	-0.0238272	0.220738	0.16487	-0.0719813	0.0891529	0.0485111		142.675		0.241833	0.240708		0.342912	0.0803051	0.208762	0.18452	0.216507	0.0350425
	143.138		-0.130376	0.010255	0.0367996	0.0441214	-0.00980008	0.0408451		143.138	0.0333997	0.162546	0.00400007	0.216653	0.138326	-0.0766188	0.0797176	0.0452277		143.138		0.240166	0.23485		0.341102	0.0877648	0.204119	0.183835	0.215306	0.0337673
	143.601		-0.139875	0.0110052	0.0330735	0.0502317	-0.0113911	0.0435738		143.601	0.0228363	0.172316	0.010265	0.221541	0.166058	-0.0704393	0.0870962	0.0470541		143.601		0.236559	0.235678		0.339105	0.0911633	0.201053	0.179197	0.213792	0.0332152
	144.064		-0.144406	0.0130296	0.0364692	0.0542877	-0.0101548	0.0455408		144.064	0.0337248	0.171716	-0.0137566	0.238047	0.166979	-0.0774624	0.0865413	0.0504729		144.064		0.240608	0.234567		0.339089	0.0943343	0.206234	0.185542	0.216729	0.0326209
	144.528		-0.141382	0.0134309	0.0362805	0.0556271	-0.00901097	0.0449585		144.528	0.0232429	0.155724	0.00359656	0.252624	0.152549	-0.0867016	0.0835058	0.0508498		144.528		0.239351	0.232343		0.33826	0.0957515	0.206444	0.184092	0.21604	0.0323156
	144.991		-0.176908	0.0156092	0.0320435	0.0613346	-0.0169803	0.0541415		144.991	0.00968504	0.162979	-0.00179078	0.232345	0.165561	-0.0641235	0.0841093	0.0482077		144.991		0.237331	0.22667		0.336777	0.0970793	0.205384	0.182644	0.214314	0.0318885
	145.454		-0.181979	0.0112062	0.0312891	0.0713723	-0.0170279	0.0563879		145.454	0.00268357	0.154495	0.00427652	0.235772	0.175311	-0.0627329	0.0849674	0.0485918		145.454		0.233139	0.222322		0.331072	0.0855982	0.207952	0.177913	0.209666	0.0325855
	145.917		-0.201643	0.0131799	0.0243368	0.0589281	-0.0262995	0.0592535		145.917	0.00124403	0.159844	0.0132166	0.222896	0.160915	-0.0699834	0.0813553	0.0470773		145.917		0.228181	0.213104		0.329331	0.0872961	0.213911	0.178841	0.208444	0.0319416
	146.38		-0.200466	0.0152764	0.0259828	0.0547288	-0.0261196	0.0587094		146.38	-0.00996846	0.173056	0.00496884	0.229524	0.193742	-0.0612548	0.0883447	0.0507324		146.38		0.224281	0.208775		0.331275	0.0930198	0.216303	0.181498	0.209192	0.0313292
	146.844		-0.199428	0.0143438	0.0272587	0.0704455	-0.021845	0.0603974		146.844	-0.0148312	0.182159	0.0174217	0.226527	0.185995	-0.0775482	0.0866204	0.0518359		146.844		0.220765	0.198545		0.331369	0.102004	0.218056	0.176645	0.207897	0.0304366
	147.307		-0.222907	0.0156544	0.0234694	0.0677854	-0.0289995	0.0656471		147.307	-0.0233108	0.167484	0.0309385	0.247267	0.184998	-0.0648649	0.0904188	0.0516627		147.307		0.222882	0.195167		0.327406	0.104439	0.215804	0.172528	0.206371	0.0298173
	147.77		-0.259796	0.0130861	0.0332584	0.077071	-0.0340952	0.0764097		147.77	-0.0228233	0.168577	0.0242948	0.243312	0.182695	-0.0835832	0.0854119	0.0533299		147.77		0.221281	0.203433		0.328999	0.0967956	0.217044	0.173439	0.206832	0.0308072
	148.233		-0.23768	0.0190527	0.0397059	0.0926408	-0.0215701	0.0736842		148.233	-0.0226265	0.175047	0.0613515	0.235422	0.236489	-0.0757867	0.101649	0.0547771		148.233		0.221526	0.203612		0.329554	0.0901278	0.213788	0.172834	0.20524	0.0316732
	148.697		-0.236813	0.0143202	0.0451337	0.105814	-0.0178861	0.0754096		148.697	-0.0574854	0.174152	0.0621027	0.240356	0.260193	-0.0853892	0.0989881	0.0609538		148.697		0.214825	0.201177		0.331776	0.0917674	0.21518	0.167638	0.203727	0.0318824
	149.16		-0.225604	0.0106489	0.0548045	0.110113	-0.0125095	0.0738879		149.16	-0.0524806	0.171852	0.0570271	0.22786	0.253688	-0.0860491	0.0953162	0.0590792		149.16		0.213026	0.207246		0.330975	0.0845965	0.221001	0.168953	0.204299	0.032654
	149.623		-0.266371	0.0133926	0.0472772	0.104775	-0.0252317	0.0825628		149.623	-0.0518487	0.169283	0.0750549	0.222007	0.241831	-0.114896	0.0902387	0.0603022		149.623		0.207741	0.218589		0.33077	0.082393	0.219972	0.175638	0.205851	0.0327234
	150.086		-0.275196	0.0155736	0.0404136	0.0949498	-0.0310648	0.0830482		150.086	-0.0714818	0.170179	0.10034	0.212863	0.264111	-0.0958194	0.0966985	0.0611777		150.086		0.20521	0.219082		0.331561	0.0838123	0.22094	0.183592	0.207366	0.0324454
	150.55		-0.302602	0.0104539	0.0338265	0.0887561	-0.0423914	0.0882757		150.55	-0.0512134	0.167666	0.0993929	0.237744	0.26946	-0.0843185	0.106455	0.0602378		150.55		0.207447	0.214662		0.328517	0.0814478	0.221338	0.184406	0.206303	0.0323015

## Sheet: Figure 5D
	Figure 5D
	Cyclops-GFP
	Distance (µm)	Background-subtracted and normalized intensity in wild-type embryos								Mean normalized intensity	SEM		Distance (µm)	Background-subtracted and normalized intensity in acvr1b-a-/- + 0.4 ng acvr1b-b MO-1 embryos						Mean normalized intensity	SEM		Distance (µm)	Background-subtracted and normalized intensity in MZoep-/- embryos									Mean normalized intensity	SEM
		1	2	3	4	5	6	7	8					1	2	3	4	5	6					1	2	3	4	5	6	7	8	9
	0	1	1	1	1	1	1	1	1	1	0		0	1	1	1	1	1	1	1	0		0	1	1	1	1	1	1	1	1	1	1	0
	0.463229	0.979712	0.987558	0.973433	0.939245	0.947686	0.955356	0.952563	0.964901	0.962556	0.00591532		0.463229	1.00299	1.0578	0.975307	0.98843	0.974256	0.981902	0.996781	0.0129376		0.463229	0.977841	0.981442	0.983693	0.962254	0.992042	0.994121	0.99569	0.964192	0.992769	0.982672	0.00420745
	0.926459	0.9721	0.991597	0.951084	0.892829	0.915905	0.911316	0.916497	0.940504	0.936479	0.0118754		0.926459	1.01844	1.04081	0.964753	0.986435	0.976636	0.946809	0.988979	0.0142334		0.926459	0.966229	0.95417	0.963722	0.920699	0.965972	0.981596	0.977116	0.95109	0.980865	0.962384	0.0063353
	1.38969	0.958017	0.977104	0.927472	0.850892	0.876847	0.873525	0.898644	0.897035	0.907442	0.0154005		1.38969	0.996631	1.04188	0.954496	0.974413	0.955876	0.925884	0.974863	0.0164715		1.38969	0.942888	0.939817	0.917901	0.890024	0.943947	0.963399	0.960595	0.941021	0.959313	0.939878	0.00777773
	1.85292	0.952642	0.967474	0.879875	0.809508	0.833913	0.824891	0.860611	0.874781	0.875462	0.0203966		1.85292	0.962348	1.08039	0.93623	0.968725	0.961872	0.853356	0.960487	0.0297291		1.85292	0.92715	0.926822	0.912478	0.8519	0.938068	0.946857	0.952692	0.922221	0.930351	0.923171	0.0098107
	2.31615	0.946283	0.968496	0.8169	0.761581	0.802152	0.793022	0.830365	0.855711	0.846814	0.026083		2.31615	0.950963	1.08082	0.932003	0.965636	0.968471	0.897283	0.965863	0.02536		2.31615	0.914103	0.904245	0.8842	0.828429	0.910767	0.951864	0.950484	0.909706	0.907338	0.906793	0.012177
	2.77938	0.926979	0.975566	0.78067	0.718979	0.776755	0.761106	0.782	0.836835	0.819861	0.0311859		2.77938	0.943988	1.05761	0.92248	0.963875	0.95434	0.915275	0.959595	0.021007		2.77938	0.890156	0.891747	0.878425	0.808852	0.892993	0.932631	0.941695	0.90537	0.895049	0.892991	0.0125842
	3.24261	0.903135	0.968821	0.740959	0.685715	0.754819	0.722081	0.76685	0.816026	0.794801	0.0340525		3.24261	0.930667	1.05919	0.914955	0.956852	0.897878	0.830074	0.931602	0.0308967		3.24261	0.884922	0.87036	0.874517	0.787714	0.881716	0.907805	0.931881	0.880222	0.872424	0.87684	0.0129632
	3.70583	0.902636	0.97523	0.703768	0.655073	0.723822	0.693216	0.743471	0.783785	0.772625	0.0392277		3.70583	0.964784	1.05409	0.905885	0.956765	0.864284	0.810589	0.926065	0.0348282		3.70583	0.873706	0.852102	0.84558	0.775564	0.865802	0.907706	0.925909	0.881996	0.857627	0.86511	0.014189
	4.16906	0.89342	0.974508	0.681261	0.60884	0.697195	0.665609	0.71879	0.766579	0.750775	0.0436665		4.16906	0.953313	1.03638	0.889007	0.950532	0.831671	0.811935	0.91214	0.0344758		4.16906	0.870721	0.836288	0.792483	0.757639	0.848499	0.890031	0.924684	0.864354	0.840007	0.84719	0.0166138
	4.63229	0.881784	0.959443	0.657106	0.567506	0.682279	0.637425	0.705843	0.748904	0.730036	0.0461343		4.63229	0.946929	1.05387	0.874719	0.947885	0.811177	0.83225	0.911138	0.0367626		4.63229	0.86093	0.815377	0.774849	0.750592	0.818598	0.880113	0.911727	0.855774	0.815475	0.831493	0.0169532
	5.09552	0.879492	0.964903	0.643045	0.531012	0.683912	0.603669	0.712874	0.740342	0.719906	0.0504184		5.09552	0.954632	1.04314	0.869605	0.921628	0.8224	0.826268	0.906278	0.0346823		5.09552	0.859673	0.803922	0.75374	0.740087	0.810617	0.851712	0.897807	0.842698	0.791215	0.81683	0.0170822
	5.55875	0.864296	0.951751	0.638734	0.500031	0.649812	0.579665	0.718552	0.727561	0.7038	0.052116		5.55875	0.922685	1.02694	0.861603	0.885455	0.800825	0.782905	0.880069	0.0362759		5.55875	0.851456	0.791574	0.75578	0.734122	0.79709	0.840629	0.906117	0.834332	0.779416	0.810057	0.0177271
	6.02198	0.865145	0.947986	0.639583	0.479305	0.636367	0.563628	0.693275	0.712737	0.692253	0.0540337		6.02198	0.962138	1.04078	0.85002	0.859876	0.779723	0.78808	0.880103	0.0417952		6.02198	0.849144	0.772696	0.73712	0.730411	0.786214	0.82964	0.892733	0.830963	0.777176	0.800678	0.0179121
	6.48521	0.861071	0.925094	0.624313	0.468341	0.619389	0.537124	0.662037	0.696635	0.67425	0.0543107		6.48521	0.954822	1.02126	0.841516	0.850789	0.755977	0.800009	0.87073	0.0404774		6.48521	0.84623	0.764844	0.743737	0.733459	0.773903	0.831043	0.883139	0.812669	0.754463	0.793721	0.0172412
	6.94844	0.854024	0.889342	0.636076	0.462648	0.595411	0.517537	0.625429	0.683637	0.658013	0.0527719		6.94844	0.958438	0.983634	0.83853	0.854401	0.755486	0.794843	0.864222	0.0367556		6.94844	0.844612	0.747719	0.750327	0.719695	0.768163	0.814047	0.872253	0.799844	0.757644	0.786034	0.0167123
	7.41167	0.837355	0.85885	0.656222	0.454596	0.597463	0.497741	0.578577	0.673297	0.644263	0.0514547		7.41167	0.990437	0.979266	0.835763	0.851351	0.752776	0.767883	0.862913	0.041566		7.41167	0.830772	0.734651	0.751634	0.716191	0.752809	0.808506	0.861108	0.784024	0.744464	0.776018	0.0161491
	7.8749	0.851074	0.834321	0.663906	0.446808	0.580359	0.483217	0.553712	0.661547	0.634368	0.0527802		7.8749	1.0017	0.953137	0.829744	0.853804	0.725927	0.770725	0.85584	0.0430311		7.8749	0.816669	0.728552	0.757685	0.71076	0.750565	0.788839	0.849877	0.783766	0.753003	0.771079	0.0144999
	8.33813	0.834305	0.806182	0.664745	0.446812	0.569889	0.474294	0.531711	0.656983	0.623115	0.0509575		8.33813	0.959545	0.912829	0.833781	0.850482	0.703377	0.796955	0.842828	0.0366126		8.33813	0.813126	0.722312	0.774543	0.698733	0.728374	0.778737	0.821264	0.778056	0.738503	0.761516	0.0139841
	8.80136	0.803479	0.792172	0.645733	0.440515	0.575622	0.462408	0.509815	0.641337	0.608885	0.0490257		8.80136	0.944811	0.868618	0.838684	0.851291	0.700987	0.763562	0.827992	0.0347542		8.80136	0.802916	0.717987	0.784446	0.704235	0.721129	0.773257	0.818735	0.770856	0.719375	0.756993	0.0140127
	9.26459	0.8018	0.767306	0.653969	0.434178	0.56967	0.453561	0.481146	0.633934	0.599445	0.0494188		9.26459	0.929528	0.866044	0.847632	0.853736	0.686541	0.77797	0.826908	0.0343072		9.26459	0.805478	0.720396	0.774567	0.69394	0.710886	0.769369	0.807752	0.763762	0.71534	0.751277	0.0141013
	9.72782	0.808063	0.751781	0.646811	0.429892	0.562533	0.440957	0.457325	0.62476	0.590265	0.0507735		9.72782	0.93487	0.854159	0.845555	0.832541	0.69407	0.713375	0.812428	0.0374414		9.72782	0.806558	0.719345	0.724874	0.689811	0.695585	0.757267	0.80237	0.762577	0.719471	0.741984	0.0142697
	10.191	0.810781	0.735293	0.640109	0.420006	0.564465	0.429115	0.427073	0.614066	0.580114	0.0524646		10.191	1.00613	0.855958	0.841938	0.821998	0.652771	0.725	0.817299	0.0494537		10.191	0.789519	0.712073	0.653139	0.688177	0.685044	0.743051	0.793374	0.74986	0.699998	0.723804	0.0161062
	10.6543	0.805119	0.735109	0.636564	0.412583	0.562108	0.413082	0.392545	0.6054	0.570314	0.0549645		10.6543	0.965467	0.837538	0.855801	0.836879	0.620274	0.741407	0.809561	0.0477662		10.6543	0.787625	0.707656	0.628433	0.67265	0.675827	0.734869	0.770726	0.753529	0.702224	0.714838	0.017199
	11.1175	0.795564	0.754134	0.618597	0.409618	0.550965	0.405219	0.389087	0.596978	0.56502	0.0556844		11.1175	0.91971	0.813171	0.868238	0.831051	0.619705	0.750245	0.800353	0.0428586		11.1175	0.770113	0.69608	0.586266	0.667175	0.674817	0.725201	0.770542	0.742122	0.702456	0.703863	0.0193059
	11.5807	0.799219	0.755964	0.602709	0.403064	0.550816	0.388745	0.369811	0.597419	0.558468	0.0581019		11.5807	0.889086	0.794809	0.864444	0.843669	0.606201	0.724584	0.787132	0.043311		11.5807	0.758033	0.691667	0.572329	0.664512	0.671163	0.71034	0.763112	0.740577	0.701059	0.696977	0.0195375
	12.044	0.780121	0.740646	0.5841	0.398765	0.545515	0.386373	0.340719	0.594066	0.546288	0.0575947		12.044	0.874388	0.769568	0.863446	0.84385	0.618948	0.727851	0.783009	0.0402745		12.044	0.74868	0.687298	0.576536	0.65851	0.657797	0.716384	0.758248	0.74147	0.681114	0.691782	0.019151
	12.5072	0.788992	0.696726	0.577888	0.402531	0.540845	0.378664	0.319444	0.591054	0.537018	0.0573373		12.5072	0.845618	0.776914	0.867702	0.819323	0.610641	0.743253	0.777242	0.0380966		12.5072	0.748133	0.683407	0.563601	0.648756	0.643922	0.724614	0.742402	0.734228	0.67912	0.685354	0.020086
	12.9704	0.789373	0.67495	0.565994	0.398621	0.527957	0.369865	0.318218	0.580551	0.528191	0.0566741		12.9704	0.847341	0.797231	0.867687	0.8032	0.592361	0.771245	0.779844	0.040143		12.9704	0.743668	0.684726	0.550279	0.646965	0.641129	0.715894	0.729863	0.742324	0.685454	0.682256	0.0207995
	13.4337	0.789975	0.655965	0.560412	0.386881	0.527533	0.357712	0.303095	0.58786	0.521179	0.0580583		13.4337	0.827608	0.812764	0.872304	0.791006	0.599226	0.707818	0.768454	0.0404438		13.4337	0.72988	0.670424	0.543868	0.634739	0.634617	0.719011	0.737199	0.726788	0.681494	0.675336	0.0210848
	13.8969	0.803033	0.638718	0.551682	0.381215	0.526166	0.354113	0.295725	0.581223	0.516484	0.0591566		13.8969	0.810082	0.786833	0.869683	0.768788	0.601941	0.694873	0.755367	0.0384842		13.8969	0.726302	0.650471	0.542325	0.640366	0.631272	0.729022	0.719559	0.714189	0.690003	0.671501	0.0205826
	14.3601	0.786807	0.620545	0.537563	0.382394	0.523633	0.343497	0.275076	0.569393	0.504864	0.0585998		14.3601	0.789088	0.798323	0.877633	0.768956	0.610318	0.696766	0.756847	0.0376723		14.3601	0.734218	0.634397	0.532792	0.632466	0.620821	0.729614	0.715862	0.723908	0.676706	0.666754	0.0225334
	14.8233	0.793468	0.603601	0.538451	0.377254	0.513364	0.336351	0.273096	0.564956	0.500067	0.0591708		14.8233	0.783919	0.799888	0.893422	0.783824	0.622449	0.705582	0.764847	0.0375378		14.8233	0.72518	0.618945	0.526642	0.621031	0.61742	0.720389	0.713273	0.729097	0.686875	0.662095	0.0232713
	15.2866	0.787497	0.590607	0.524244	0.377563	0.511123	0.32952	0.265115	0.560855	0.493316	0.0588804		15.2866	0.752004	0.778287	0.885158	0.783946	0.638887	0.748532	0.764469	0.0323091		15.2866	0.723987	0.596905	0.505578	0.618546	0.609104	0.723605	0.70412	0.714691	0.678387	0.652769	0.0250225
	15.7498	0.7851	0.586647	0.516849	0.374537	0.496786	0.328768	0.262395	0.546727	0.487226	0.0584745		15.7498	0.760558	0.793738	0.868905	0.795674	0.63286	0.66068	0.752069	0.0364798		15.7498	0.716991	0.578922	0.490356	0.607701	0.605865	0.725671	0.701553	0.703232	0.673544	0.644871	0.0264308
	16.213	0.776498	0.579937	0.50721	0.366606	0.467793	0.316129	0.262384	0.547939	0.478062	0.058316		16.213	0.742858	0.787691	0.862423	0.784539	0.641337	0.587378	0.734371	0.0416699		16.213	0.722019	0.561491	0.482532	0.593146	0.596513	0.731171	0.689848	0.697068	0.659591	0.637042	0.0279215
	16.6763	0.762768	0.595531	0.501169	0.358223	0.454725	0.318356	0.264207	0.54876	0.475467	0.0577062		16.6763	0.71751	0.786646	0.868147	0.777446	0.656294	0.610655	0.736116	0.0383631		16.6763	0.704907	0.547116	0.457255	0.585352	0.593119	0.739403	0.69389	0.692569	0.663335	0.630772	0.0304473
	17.1395	0.772765	0.583508	0.496392	0.351768	0.451508	0.314705	0.272474	0.532514	0.471954	0.0577213		17.1395	0.713725	0.776557	0.860714	0.777773	0.662502	0.62816	0.736572	0.034866		17.1395	0.697639	0.533989	0.460134	0.56506	0.583025	0.748595	0.701467	0.68456	0.674504	0.627664	0.0318747
	17.6027	0.757658	0.594004	0.490608	0.338116	0.426885	0.303502	0.264248	0.52241	0.462179	0.0582657		17.6027	0.72266	0.753729	0.842717	0.794429	0.660299	0.639905	0.735623	0.0317589		17.6027	0.687315	0.52638	0.455554	0.560704	0.584175	0.745228	0.693651	0.697006	0.675548	0.625062	0.0322812
	18.0659	0.751486	0.5931	0.468809	0.331604	0.418531	0.292855	0.24735	0.516412	0.452518	0.0592896		18.0659	0.736734	0.73226	0.827211	0.802549	0.64075	0.554719	0.715704	0.0417239		18.0659	0.670123	0.519638	0.465116	0.556953	0.580228	0.743549	0.683308	0.685328	0.654429	0.61763	0.0304607
	18.5292	0.756388	0.614083	0.458142	0.322562	0.414207	0.289966	0.240907	0.519907	0.45202	0.0616108		18.5292	0.697732	0.702805	0.801834	0.831954	0.654697	0.552205	0.706871	0.0413954		18.5292	0.666655	0.512502	0.461107	0.554883	0.579819	0.726341	0.683559	0.695282	0.63543	0.612842	0.0301907
	18.9924	0.75438	0.618498	0.458472	0.31926	0.394725	0.280792	0.211071	0.509283	0.44331	0.0641056		18.9924	0.683483	0.693893	0.783333	0.869279	0.676692	0.538682	0.70756	0.0455095		18.9924	0.650131	0.504794	0.439158	0.547276	0.572266	0.703603	0.688678	0.706204	0.626449	0.604284	0.0314924
	19.4556	0.746737	0.620332	0.450147	0.309088	0.402146	0.269635	0.210331	0.496205	0.438078	0.0641124		19.4556	0.694927	0.697595	0.769804	0.871748	0.728896	0.571628	0.722433	0.0402891		19.4556	0.656024	0.496527	0.426792	0.552381	0.570442	0.685406	0.685127	0.707182	0.620913	0.600088	0.0319405
	19.9189	0.738063	0.604662	0.454489	0.30527	0.381739	0.258956	0.19984	0.483569	0.428323	0.0639437		19.9189	0.65156	0.689092	0.738652	0.842008	0.73571	0.544505	0.700255	0.0406526		19.9189	0.651833	0.485627	0.399607	0.547276	0.568073	0.668346	0.701928	0.697932	0.611628	0.592472	0.0341567
	20.3821	0.7258	0.615882	0.45356	0.30222	0.367781	0.252067	0.179947	0.480831	0.422261	0.0653419		20.3821	0.647763	0.691324	0.729781	0.819036	0.731339	0.549201	0.694741	0.037156		20.3821	0.642841	0.479742	0.411812	0.533036	0.562207	0.64546	0.715498	0.680439	0.611754	0.586977	0.0329378
	20.8453	0.702058	0.615538	0.45606	0.295611	0.383988	0.247072	0.178772	0.471534	0.418829	0.0636117		20.8453	0.651065	0.655723	0.722659	0.810109	0.683256	0.543166	0.677663	0.0359981		20.8453	0.640504	0.480797	0.418083	0.546781	0.556125	0.624448	0.702679	0.666562	0.604479	0.582273	0.0303828
	21.3085	0.696565	0.592914	0.459897	0.296875	0.38142	0.241284	0.168143	0.456616	0.411714	0.0627908		21.3085	0.64905	0.619179	0.706469	0.794827	0.675356	0.512573	0.659576	0.0383377		21.3085	0.632907	0.479345	0.404273	0.57308	0.552267	0.612369	0.704399	0.659511	0.593234	0.579043	0.0306502
	21.7718	0.689746	0.556578	0.447577	0.29366	0.372168	0.233952	0.166753	0.452212	0.401581	0.0608714		21.7718	0.634258	0.63118	0.684819	0.775646	0.662309	0.503607	0.648636	0.0361353		21.7718	0.625941	0.481758	0.404491	0.611076	0.547553	0.59829	0.702362	0.647503	0.58312	0.57801	0.0299123
	22.235	0.695902	0.545173	0.4433	0.288253	0.351902	0.235793	0.167301	0.452703	0.397541	0.0611132		22.235	0.626562	0.634398	0.669694	0.783827	0.63231	0.516158	0.643825	0.0351607		22.235	0.626732	0.485618	0.423833	0.636347	0.533874	0.579922	0.68983	0.639421	0.577515	0.57701	0.0279637
	22.6982	0.685017	0.538576	0.427904	0.289126	0.365684	0.234177	0.170783	0.435918	0.393398	0.0591104		22.6982	0.619187	0.622396	0.658065	0.78524	0.609869	0.526448	0.636868	0.0345963		22.6982	0.618501	0.472673	0.424817	0.580816	0.535201	0.570714	0.69931	0.628672	0.571301	0.56689	0.0274645
	23.1615	0.675454	0.529563	0.417237	0.285355	0.357705	0.23284	0.18057	0.425733	0.388057	0.0572439		23.1615	0.609906	0.606357	0.654496	0.764091	0.628154	0.500969	0.627329	0.0347144		23.1615	0.612984	0.474059	0.417523	0.501511	0.532113	0.556921	0.684244	0.618854	0.570871	0.55212	0.0271725
	23.6247	0.668544	0.532101	0.395161	0.296426	0.359005	0.231867	0.16445	0.420466	0.383503	0.0573199		23.6247	0.618403	0.602646	0.64794	0.76438	0.60928	0.512036	0.625781	0.0334168		23.6247	0.595814	0.482298	0.433178	0.445019	0.528502	0.557117	0.683229	0.613537	0.563397	0.544677	0.0272781
	24.0879	0.686454	0.532784	0.387102	0.288626	0.349138	0.222789	0.162251	0.416708	0.380731	0.0597737		24.0879	0.613597	0.565975	0.629929	0.745577	0.598073	0.511272	0.610737	0.0319456		24.0879	0.590411	0.484273	0.441264	0.413334	0.526516	0.543225	0.679612	0.610254	0.550069	0.537662	0.0279164
	24.5512	0.686729	0.523592	0.381106	0.287064	0.346555	0.222649	0.164694	0.409045	0.377679	0.0592174		24.5512	0.644062	0.552475	0.619582	0.72066	0.587627	0.499017	0.603904	0.0313058		24.5512	0.581316	0.484612	0.465784	0.389518	0.512548	0.542182	0.67085	0.605332	0.559849	0.534666	0.0276922
	25.0144	0.688008	0.502932	0.36354	0.282942	0.330869	0.215333	0.160025	0.407896	0.368943	0.0593704		25.0144	0.6286	0.554086	0.617342	0.717529	0.577818	0.506765	0.600357	0.0295656		25.0144	0.571326	0.478252	0.474893	0.368306	0.504407	0.536354	0.664316	0.590542	0.554325	0.526969	0.0280074
	25.4776	0.701894	0.497159	0.350433	0.287093	0.314927	0.209878	0.146664	0.413228	0.365159	0.0617904		25.4776	0.617557	0.541797	0.615359	0.715698	0.578825	0.518631	0.597978	0.0284971		25.4776	0.566779	0.483025	0.482644	0.352915	0.508119	0.527257	0.664392	0.584218	0.546287	0.52396	0.0285251
	25.9408	0.674344	0.485943	0.342968	0.288816	0.302247	0.202609	0.13452	0.406656	0.354763	0.0599013		25.9408	0.603459	0.53326	0.62058	0.717322	0.584016	0.556207	0.602474	0.0263255		25.9408	0.570406	0.487702	0.507485	0.33807	0.504171	0.520093	0.66007	0.585698	0.549398	0.524788	0.0292696
	26.4041	0.666193	0.497154	0.334027	0.29115	0.295224	0.200074	0.12616	0.395776	0.35072	0.0602116		26.4041	0.607761	0.525423	0.623559	0.711182	0.570909	0.504527	0.59056	0.0305314		26.4041	0.568375	0.479059	0.516575	0.326508	0.497959	0.508714	0.66228	0.59198	0.553814	0.522807	0.030862
	26.8673	0.666824	0.490249	0.328641	0.295338	0.285741	0.195789	0.131734	0.394147	0.348558	0.0599068		26.8673	0.600091	0.549451	0.625188	0.687429	0.545225	0.513002	0.586731	0.0260423		26.8673	0.56371	0.463853	0.539508	0.311655	0.489514	0.506433	0.639804	0.584208	0.54416	0.515872	0.0309279
	27.3305	0.664891	0.477174	0.323397	0.294816	0.277159	0.179804	0.121416	0.39262	0.34141	0.0607736		27.3305	0.598988	0.515542	0.594406	0.696461	0.543182	0.539672	0.581375	0.0266187		27.3305	0.556674	0.457426	0.556242	0.301249	0.487721	0.500023	0.631892	0.567591	0.529184	0.509778	0.0311349
	27.7938	0.667555	0.483798	0.309387	0.295767	0.263023	0.178384	0.131171	0.382229	0.338914	0.0609878		27.7938	0.625881	0.490722	0.581796	0.690532	0.544292	0.595223	0.588074	0.0279355		27.7938	0.548185	0.451686	0.575753	0.289376	0.491143	0.493618	0.633403	0.557016	0.53465	0.508315	0.0325965
	28.257	0.670587	0.472897	0.305971	0.290355	0.252114	0.176418	0.11829	0.3677	0.331791	0.061881		28.257	0.615018	0.475132	0.572437	0.676858	0.525931	0.635852	0.583538	0.0303481		28.257	0.543161	0.449563	0.619808	0.274601	0.481745	0.487783	0.622082	0.553884	0.529794	0.506936	0.0350218
	28.7202	0.6751	0.466641	0.299673	0.295632	0.257238	0.170202	0.109011	0.375729	0.331153	0.0629075		28.7202	0.590106	0.504615	0.555463	0.687539	0.49904	0.608662	0.574237	0.0289416		28.7202	0.52518	0.445884	0.58566	0.272923	0.485173	0.477566	0.614453	0.547892	0.537612	0.499149	0.033331
	29.1834	0.669266	0.467081	0.281368	0.296267	0.244618	0.163753	0.112672	0.375978	0.326375	0.0629008		29.1834	0.612677	0.507501	0.535689	0.697296	0.48979	0.606531	0.574914	0.0320064		29.1834	0.516048	0.444658	0.544408	0.264463	0.491732	0.478162	0.597423	0.538581	0.524643	0.488902	0.0315774
	29.6467	0.667706	0.462791	0.272711	0.291217	0.24035	0.156571	0.119328	0.377763	0.323555	0.062808		29.6467	0.59457	0.477977	0.52265	0.683631	0.481756	0.576254	0.55614	0.0320933		29.6467	0.508633	0.438308	0.527291	0.252706	0.480596	0.4691	0.585234	0.531191	0.526969	0.480003	0.0317273
	30.1099	0.67007	0.468758	0.265235	0.294851	0.249524	0.159921	0.109154	0.370944	0.323557	0.0635065		30.1099	0.584783	0.49879	0.522149	0.677978	0.491712	0.589939	0.560892	0.0290214		30.1099	0.503209	0.434745	0.492541	0.252789	0.483423	0.46852	0.580231	0.516333	0.510987	0.47142	0.0303168
	30.5731	0.661923	0.465681	0.270226	0.302489	0.254248	0.16076	0.0987148	0.359307	0.321669	0.0628332		30.5731	0.580515	0.491818	0.502578	0.650073	0.470877	0.590598	0.547743	0.0285528		30.5731	0.486113	0.430396	0.461519	0.245968	0.478135	0.471236	0.579101	0.523826	0.506389	0.464743	0.0307395
	31.0364	0.661621	0.450814	0.25359	0.293444	0.243408	0.152611	0.0989282	0.35751	0.313991	0.0630771		31.0364	0.569989	0.46065	0.496103	0.639162	0.459398	0.562808	0.531352	0.0291685		31.0364	0.483372	0.430839	0.406532	0.240689	0.471202	0.46879	0.574199	0.524156	0.513045	0.45698	0.0317202
	31.4996	0.666007	0.449696	0.250658	0.286693	0.24355	0.145443	0.0923119	0.357322	0.31146	0.0642853		31.4996	0.55939	0.475553	0.48347	0.611053	0.479344	0.595954	0.534127	0.0254143		31.4996	0.480008	0.412583	0.373597	0.239481	0.480504	0.455656	0.573645	0.530827	0.509609	0.450657	0.03308
	31.9628	0.656468	0.450078	0.241728	0.29414	0.239004	0.145044	0.0932027	0.345623	0.308161	0.0633962		31.9628	0.553287	0.492294	0.475706	0.590045	0.479978	0.61997	0.535214	0.0251336		31.9628	0.467008	0.410966	0.343589	0.221077	0.472696	0.449999	0.577398	0.51983	0.507897	0.441162	0.0353185
	32.4261	0.67441	0.450189	0.224585	0.293255	0.23262	0.138589	0.0745379	0.345439	0.304203	0.0670585		32.4261	0.529199	0.492754	0.464628	0.573487	0.469824	0.572386	0.517046	0.0199694		32.4261	0.469257	0.40776	0.311611	0.21933	0.46617	0.444884	0.563482	0.51737	0.494222	0.432676	0.0356438
	32.8893	0.650599	0.444077	0.226458	0.292083	0.224935	0.135713	0.0670806	0.336721	0.297208	0.0650976		32.8893	0.554472	0.48069	0.466639	0.576183	0.454398	0.627918	0.526717	0.0285288		32.8893	0.466127	0.404306	0.299922	0.216881	0.457684	0.442193	0.56357	0.505246	0.503284	0.428802	0.036148
	33.3525	0.66201	0.447469	0.226573	0.284926	0.218254	0.128516	0.0663321	0.334251	0.296041	0.066836		33.3525	0.526974	0.462734	0.462658	0.564407	0.440374	0.626014	0.51386	0.0294058		33.3525	0.461718	0.393797	0.284244	0.21052	0.446421	0.441971	0.546687	0.497166	0.507634	0.421129	0.0364371
	33.8157	0.657445	0.437968	0.226409	0.274385	0.215899	0.125007	0.0671646	0.328208	0.291561	0.0661448		33.8157	0.515584	0.440439	0.459271	0.542488	0.444306	0.578956	0.496841	0.0234736		33.8157	0.455054	0.387488	0.270014	0.21294	0.4349	0.442193	0.543673	0.500856	0.497279	0.416044	0.0365213
	34.279	0.655414	0.4273	0.21924	0.267598	0.215315	0.12306	0.0495441	0.324418	0.285236	0.0668362		34.279	0.507143	0.451522	0.464619	0.542374	0.440109	0.61858	0.504058	0.0276875		34.279	0.453351	0.383528	0.274572	0.202333	0.429791	0.44044	0.545358	0.501837	0.500205	0.414602	0.0372802
	34.7422	0.651499	0.419536	0.219932	0.259388	0.203368	0.119827	0.0555894	0.319183	0.28104	0.0661343		34.7422	0.48343	0.454164	0.462325	0.541943	0.442028	0.649978	0.505645	0.0322579		34.7422	0.458015	0.376558	0.292322	0.193938	0.424446	0.431776	0.559555	0.489692	0.509722	0.415114	0.0378345
	35.2054	0.653093	0.409426	0.224523	0.255165	0.20129	0.124105	0.0461442	0.316628	0.278797	0.0663003		35.2054	0.499844	0.434413	0.457181	0.546322	0.428507	0.635826	0.500349	0.0325782		35.2054	0.4497	0.372536	0.322416	0.188287	0.42111	0.433243	0.544731	0.477965	0.496375	0.411818	0.0354874
	35.6687	0.639296	0.402469	0.241209	0.249457	0.209151	0.116067	0.0477196	0.304195	0.276196	0.0644824		35.6687	0.485736	0.418398	0.455388	0.550748	0.434425	0.645086	0.498297	0.0350051		35.6687	0.447158	0.37711	0.30589	0.19521	0.412758	0.432652	0.532215	0.478691	0.498824	0.408946	0.0348591
	36.1319	0.65273	0.394728	0.233194	0.243474	0.204977	0.104506	0.054213	0.30212	0.273743	0.0659		36.1319	0.469552	0.41352	0.457222	0.528979	0.453916	0.613993	0.48953	0.0291754		36.1319	0.447338	0.369455	0.324221	0.19272	0.404425	0.429094	0.543186	0.483547	0.504204	0.41091	0.0353587
	36.5951	0.651257	0.387615	0.235533	0.245766	0.220044	0.0922962	0.050119	0.307152	0.273723	0.0660975		36.5951	0.476224	0.411164	0.462917	0.525655	0.457456	0.593822	0.487873	0.0259619		36.5951	0.447362	0.372286	0.330272	0.198261	0.391612	0.423895	0.538195	0.48179	0.509947	0.410402	0.0345839
	37.0583	0.646849	0.377773	0.250717	0.247273	0.219378	0.0976604	0.0472047	0.299294	0.273268	0.0650813		37.0583	0.483621	0.440592	0.447146	0.535617	0.469201	0.613666	0.498307	0.0269018		37.0583	0.446198	0.369166	0.324064	0.188955	0.38987	0.429164	0.535084	0.47143	0.50336	0.406366	0.0349628
	37.5216	0.635532	0.376137	0.249691	0.251515	0.227161	0.0928546	0.0358914	0.294779	0.270445	0.0646788		37.5216	0.488555	0.459849	0.439546	0.531876	0.478106	0.577264	0.495866	0.0206239		37.5216	0.452851	0.373147	0.328756	0.180618	0.377624	0.430547	0.516823	0.475917	0.511413	0.405299	0.035301
	37.9848	0.637241	0.38114	0.258276	0.253837	0.224806	0.0902777	0.0313018	0.296482	0.27167	0.0654129		37.9848	0.42676	0.418327	0.434745	0.517645	0.449381	0.554267	0.466854	0.0227445		37.9848	0.460662	0.372456	0.359021	0.175063	0.373547	0.436312	0.504978	0.467777	0.516388	0.407356	0.0348422
	38.448	0.628538	0.383064	0.267538	0.250128	0.227901	0.0900656	0.0428517	0.289186	0.272409	0.0637799		38.448	0.445995	0.422235	0.433251	0.50494	0.458848	0.581656	0.474488	0.0244265		38.448	0.46922	0.373333	0.375627	0.169345	0.375353	0.433148	0.497832	0.467971	0.507294	0.40768	0.0345963
	38.9113	0.636714	0.375969	0.259104	0.244109	0.239358	0.0844904	0.0267171	0.286925	0.269173	0.0656448		38.9113	0.436409	0.435498	0.441615	0.506623	0.454171	0.542119	0.469406	0.0181799		38.9113	0.476196	0.382086	0.399824	0.165694	0.370512	0.430279	0.485744	0.478389	0.501912	0.410071	0.034517
	39.3745	0.622622	0.373868	0.260191	0.235533	0.24199	0.0875952	0.0229507	0.281907	0.265832	0.0642967		39.3745	0.428132	0.434188	0.420161	0.509202	0.466931	0.569225	0.471306	0.0237353		39.3745	0.467534	0.385584	0.404356	0.159759	0.357655	0.427633	0.497884	0.464486	0.497266	0.406906	0.0349267
	39.8377	0.610979	0.353995	0.250476	0.228793	0.245926	0.0902183	0.0314048	0.28648	0.262284	0.0619655		39.8377	0.394618	0.44747	0.407109	0.513454	0.445458	0.535939	0.457341	0.0231102		39.8377	0.468944	0.390068	0.42536	0.157788	0.34735	0.426794	0.489481	0.457875	0.511122	0.408309	0.0354993
	40.3009	0.610057	0.36218	0.25358	0.223719	0.24358	0.104402	0.0360804	0.276428	0.263753	0.0611082		40.3009	0.403401	0.443146	0.406053	0.523349	0.433828	0.538217	0.457999	0.0239372		40.3009	0.463405	0.394024	0.402332	0.16476	0.343239	0.414022	0.482633	0.46213	0.514105	0.404517	0.0346295
	40.7642	0.612131	0.355156	0.260206	0.21484	0.244547	0.0933005	0.0312114	0.279418	0.261351	0.0620806		40.7642	0.414789	0.443024	0.399617	0.526085	0.433063	0.531927	0.458084	0.0232541		40.7642	0.47416	0.386529	0.388176	0.153383	0.337724	0.40463	0.472061	0.463172	0.510011	0.398872	0.0357101
	41.2274	0.595078	0.365015	0.264991	0.210885	0.249801	0.0799648	0.0271986	0.27983	0.259095	0.0616503		41.2274	0.424445	0.455192	0.397086	0.516534	0.413415	0.519928	0.454434	0.0216158		41.2274	0.474501	0.381567	0.368146	0.161562	0.332222	0.402102	0.464616	0.457284	0.508524	0.394503	0.0348246
	41.6906	0.593555	0.354624	0.263122	0.204794	0.248546	0.0726143	0.0271066	0.26909	0.254181	0.0616102		41.6906	0.418104	0.453117	0.398157	0.503114	0.391593	0.472417	0.439417	0.0180535		41.6906	0.466619	0.374864	0.328395	0.158413	0.331653	0.390445	0.456284	0.452649	0.490918	0.38336	0.0343669
	42.1539	0.586409	0.350874	0.260396	0.197983	0.243843	0.0614547	0.0317384	0.274405	0.250888	0.0612336		42.1539	0.4108	0.448074	0.382336	0.489491	0.415232	0.467785	0.43562	0.0162917		42.1539	0.467705	0.374909	0.277535	0.166656	0.326031	0.382509	0.456823	0.449957	0.505366	0.37861	0.0359681
	42.6171	0.574146	0.349463	0.261193	0.191322	0.23849	0.0603633	0.0262405	0.276021	0.247155	0.0605492		42.6171	0.411254	0.460299	0.37563	0.504921	0.42002	0.433722	0.434308	0.0181116		42.6171	0.455133	0.379936	0.261776	0.163614	0.326835	0.381403	0.444437	0.44102	0.494343	0.372055	0.0352875
	43.0803	0.582353	0.357594	0.266106	0.189307	0.227073	0.0581067	0.0205593	0.270351	0.246431	0.0621464		43.0803	0.3848	0.436221	0.371472	0.514813	0.39716	0.470363	0.429138	0.0226595		43.0803	0.456863	0.387791	0.245812	0.155727	0.31946	0.38062	0.433501	0.423876	0.49539	0.36656	0.0362123
	43.5436	0.569547	0.353118	0.261063	0.186977	0.227225	0.0566305	0.0186326	0.268933	0.242766	0.060977		43.5436	0.369513	0.424293	0.364807	0.510177	0.404028	0.475651	0.424745	0.0237785		43.5436	0.446846	0.39593	0.221052	0.146651	0.327189	0.374325	0.42229	0.431644	0.491288	0.361913	0.0374825
	44.0068	0.568005	0.350189	0.258849	0.184164	0.227476	0.0490762	0.0179564	0.267481	0.2404	0.061218		44.0068	0.385516	0.438023	0.370382	0.495199	0.407197	0.447771	0.424015	0.0186808		44.0068	0.453632	0.395482	0.217281	0.153333	0.328634	0.36303	0.412756	0.43752	0.483983	0.360628	0.036942
	44.47	0.555974	0.346308	0.261634	0.182805	0.221443	0.0505776	0.00824568	0.266224	0.236651	0.0605648		44.47	0.371915	0.414824	0.371794	0.479038	0.410724	0.436173	0.414078	0.0166188		44.47	0.445132	0.405582	0.226074	0.144621	0.319133	0.365974	0.40963	0.435693	0.474702	0.358505	0.0366447
	44.9332	0.54664	0.353192	0.258697	0.180832	0.212707	0.0509543	0.0159959	0.258535	0.234694	0.0593823		44.9332	0.379127	0.419329	0.374686	0.460082	0.382869	0.412033	0.404688	0.0133745		44.9332	0.441469	0.412454	0.222421	0.140105	0.319065	0.363371	0.390789	0.44874	0.468665	0.356342	0.0370562
	45.3965	0.540777	0.352616	0.253753	0.17442	0.216199	0.048861	0.00845771	0.251784	0.230858	0.0594351		45.3965	0.362687	0.416088	0.372715	0.446685	0.389809	0.448737	0.40612	0.015088		45.3965	0.436639	0.403972	0.238434	0.140864	0.322228	0.357144	0.39145	0.438644	0.450312	0.353299	0.0347545
	45.8597	0.543814	0.342267	0.248221	0.173967	0.21291	0.0512299	0.00192461	0.244272	0.227326	0.0596074		45.8597	0.364492	0.420712	0.365627	0.432765	0.4219	0.492748	0.416374	0.0195089		45.8597	0.430134	0.398917	0.24011	0.135521	0.30333	0.348219	0.388796	0.448434	0.45428	0.349749	0.0355787
	46.3229	0.539974	0.353155	0.244202	0.173394	0.21473	0.0510987	0.0226607	0.238341	0.229695	0.0582412		46.3229	0.344165	0.408783	0.375064	0.432239	0.41695	0.426158	0.40056	0.013935		46.3229	0.429781	0.399456	0.221928	0.131033	0.303008	0.354906	0.38446	0.445443	0.452005	0.346891	0.0365162
	46.7862	0.523448	0.34855	0.245741	0.170433	0.214273	0.0509148	0.00578934	0.233567	0.224089	0.0576759		46.7862	0.340736	0.406586	0.374166	0.417389	0.421901	0.420967	0.396958	0.0134029		46.7862	0.426775	0.383869	0.180877	0.127633	0.301618	0.34794	0.381833	0.434388	0.446959	0.336877	0.0379001
	47.2494	0.514761	0.342541	0.236765	0.16688	0.200867	0.0505622	-0.00403076	0.233612	0.217745	0.0573854		47.2494	0.354182	0.404761	0.366628	0.412753	0.435298	0.395714	0.394889	0.0122554		47.2494	0.42659	0.379385	0.149165	0.131753	0.299786	0.342296	0.363867	0.444484	0.446622	0.33155	0.0395581
	47.7126	0.516679	0.347171	0.218389	0.167939	0.191724	0.0507702	-0.00174347	0.233562	0.215561	0.0575603		47.7126	0.351774	0.397396	0.375446	0.415226	0.405287	0.366844	0.385329	0.0100051		47.7126	0.422748	0.379607	0.138221	0.131989	0.294426	0.339957	0.35976	0.433379	0.450325	0.327824	0.039865
	48.1758	0.520663	0.340854	0.205374	0.163869	0.18204	0.0494246	-0.00164737	0.231116	0.211462	0.0578751		48.1758	0.35327	0.412764	0.379237	0.422635	0.390482	0.369202	0.387932	0.0107321		48.1758	0.417759	0.366079	0.127276	0.123149	0.298662	0.340454	0.356889	0.438654	0.442728	0.323517	0.0406265
	48.6391	0.512461	0.325313	0.205326	0.158424	0.189832	0.0426895	-0.00978079	0.226623	0.206361	0.0573734		48.6391	0.347496	0.415945	0.378705	0.427557	0.39774	0.320957	0.3814	0.0167341		48.6391	0.411245	0.355337	0.133626	0.119064	0.298124	0.341617	0.353744	0.432022	0.44442	0.321022	0.0399286
	49.1023	0.494769	0.330899	0.204947	0.155509	0.182541	0.0457357	-0.00663038	0.225295	0.204133	0.0556342		49.1023	0.36278	0.422647	0.377678	0.433054	0.385847	0.347684	0.388282	0.0136655		49.1023	0.412495	0.344991	0.133473	0.118239	0.292476	0.34151	0.348578	0.428741	0.444628	0.318348	0.0397997
	49.5655	0.509406	0.323484	0.194923	0.15276	0.17288	0.0381225	-0.0165435	0.217151	0.199023	0.0578414		49.5655	0.364852	0.410825	0.367591	0.43894	0.365801	0.321371	0.37823	0.0167608		49.5655	0.409168	0.33415	0.145648	0.11822	0.292296	0.33782	0.34795	0.421447	0.453005	0.317745	0.0389207
	50.0288	0.504538	0.321987	0.197366	0.150823	0.167908	0.0420898	-0.0111626	0.220092	0.199205	0.0568524		50.0288	0.363186	0.42856	0.368788	0.431183	0.360356	0.306498	0.376428	0.0192337		50.0288	0.404164	0.328373	0.152406	0.114525	0.284738	0.348254	0.338484	0.433254	0.442872	0.316341	0.0386667
	50.492	0.499585	0.316091	0.204468	0.149948	0.158369	0.0391412	-0.0077852	0.223482	0.197912	0.0562287		50.492	0.362204	0.42348	0.357683	0.439259	0.369428	0.288321	0.373396	0.0219636		50.492	0.399589	0.322564	0.181423	0.114963	0.286214	0.350992	0.329965	0.432298	0.427613	0.31618	0.0361029
	50.9552	0.501096	0.31203	0.207563	0.147377	0.145602	0.038047	-0.015338	0.229832	0.195776	0.0570622		50.9552	0.385382	0.440928	0.341598	0.457754	0.348233	0.324038	0.382989	0.0226193		50.9552	0.406393	0.318809	0.19105	0.104912	0.279264	0.359324	0.326184	0.427158	0.431794	0.316099	0.0367884
	51.4185	0.503989	0.299236	0.202602	0.143772	0.139578	0.0346783	-0.0146221	0.228087	0.192165	0.0571289		51.4185	0.394463	0.430745	0.337945	0.454005	0.347703	0.319795	0.380776	0.0221312		51.4185	0.405395	0.32057	0.234208	0.10764	0.273688	0.371394	0.329729	0.416583	0.428173	0.32082	0.0344912
	51.8817	0.505435	0.300112	0.195985	0.142675	0.13217	0.0352471	-0.0239552	0.225842	0.189189	0.0579791		51.8817	0.407431	0.444697	0.329652	0.442157	0.3345	0.245892	0.367388	0.0318526		51.8817	0.404716	0.31136	0.265172	0.118321	0.264394	0.371516	0.32914	0.416131	0.416952	0.321967	0.0323538
	52.3449	0.500935	0.296645	0.196287	0.141056	0.126704	0.035714	-0.0194286	0.226202	0.188014	0.0572337		52.3449	0.385722	0.442999	0.321866	0.447591	0.330121	0.223809	0.358685	0.0346925		52.3449	0.400217	0.308814	0.293357	0.112434	0.264734	0.367925	0.315728	0.415203	0.403609	0.320224	0.0315736
	52.8081	0.505543	0.284724	0.200383	0.143281	0.12374	0.0482154	-0.0174134	0.2207	0.188647	0.0565799		52.8081	0.404785	0.442702	0.306221	0.438681	0.336809	0.273244	0.367074	0.0292647		52.8081	0.400799	0.311205	0.314708	0.111096	0.266185	0.350237	0.324459	0.397844	0.398543	0.319453	0.0303523
	53.2714	0.503713	0.285979	0.192079	0.146909	0.123376	0.0390928	-0.0170586	0.225238	0.187416	0.0568146		53.2714	0.388111	0.471024	0.305519	0.417086	0.347466	0.251842	0.363508	0.0322102		53.2714	0.397806	0.307995	0.325712	0.11266	0.253165	0.337487	0.311214	0.407715	0.396141	0.316655	0.0306097
	53.7346	0.509969	0.299104	0.199298	0.145313	0.118007	0.0341479	-0.0257629	0.23231	0.189048	0.0588849		53.7346	0.37733	0.480324	0.303835	0.403712	0.3565	0.199818	0.353586	0.0388446		53.7346	0.400608	0.307335	0.35088	0.11427	0.25023	0.337113	0.306876	0.41445	0.389586	0.319039	0.0309624
	54.1978	0.509441	0.287203	0.201497	0.138681	0.104402	0.0417495	-0.0155371	0.232649	0.187511	0.0578756		54.1978	0.396742	0.466098	0.300135	0.39648	0.331314	0.242184	0.355492	0.0327123		54.1978	0.39775	0.301593	0.373925	0.106354	0.243228	0.330331	0.291443	0.405287	0.392659	0.315841	0.0320915
	54.6611	0.502741	0.286258	0.203193	0.140112	0.102929	0.0407133	-0.0258685	0.235277	0.185669	0.0579566		54.6611	0.405482	0.46226	0.303989	0.398935	0.334927	0.249349	0.359157	0.0316475		54.6611	0.386035	0.2866	0.351203	0.107868	0.239329	0.320471	0.296854	0.404789	0.387959	0.309012	0.0310051
	55.1243	0.509396	0.276377	0.193468	0.137361	0.0983031	0.037852	-0.038221	0.220523	0.179382	0.0591502		55.1243	0.421811	0.46173	0.304642	0.392712	0.33252	0.184133	0.349591	0.0405538		55.1243	0.382682	0.286544	0.358326	0.106971	0.241417	0.320505	0.297009	0.394735	0.376927	0.307235	0.0302678
	55.5875	0.499023	0.282428	0.191335	0.139372	0.098606	0.04647	-0.0344054	0.21386	0.179586	0.0575723		55.5875	0.422111	0.438829	0.298672	0.391762	0.333733	0.206133	0.34854	0.0357858		55.5875	0.389468	0.282936	0.343321	0.106012	0.241886	0.322156	0.302275	0.39424	0.369613	0.305767	0.0300705
	56.0507	0.504421	0.286196	0.170722	0.134286	0.0980558	0.0447346	-0.033464	0.202656	0.175951	0.0581965		56.0507	0.405546	0.439425	0.298224	0.394955	0.330517	0.214563	0.347205	0.0338918		56.0507	0.385254	0.285625	0.369722	0.10321	0.237775	0.318389	0.293174	0.388629	0.358831	0.304512	0.03038
	56.514	0.490443	0.266407	0.163536	0.142864	0.104119	0.0459707	-0.0327715	0.207304	0.173484	0.0558842		56.514	0.394024	0.405922	0.291128	0.386306	0.324199	0.231328	0.338818	0.0281945		56.514	0.390752	0.280295	0.375096	0.104595	0.230445	0.317113	0.2989	0.394544	0.360703	0.305827	0.0311574
	56.9772	0.485574	0.266081	0.169544	0.14856	0.101691	0.0443463	-0.0485045	0.199339	0.170829	0.0564315		56.9772	0.429763	0.407546	0.29018	0.379639	0.350185	0.218805	0.34602	0.0322736		56.9772	0.388026	0.283784	0.352102	0.102334	0.23147	0.31683	0.2929	0.391835	0.373526	0.303645	0.0308555
	57.4404	0.491878	0.275157	0.164115	0.153425	0.10803	0.0393313	-0.0380399	0.19052	0.173052	0.0566181		57.4404	0.430317	0.395127	0.299142	0.38698	0.36235	0.208477	0.347066	0.03295		57.4404	0.386753	0.287138	0.338764	0.1034	0.227569	0.318336	0.300406	0.391758	0.379999	0.303791	0.0307585
	57.9037	0.494254	0.272957	0.151083	0.155219	0.108623	0.0423089	-0.0426281	0.188802	0.171327	0.0569993		57.9037	0.432885	0.409343	0.298919	0.382147	0.344721	0.182862	0.341813	0.0372357		57.9037	0.380625	0.287221	0.328503	0.109238	0.232415	0.317513	0.29613	0.382266	0.377307	0.301247	0.0292227
	58.3669	0.489175	0.275141	0.149651	0.162878	0.106451	0.0403841	-0.0384376	0.186254	0.171437	0.056367		58.3669	0.410496	0.404171	0.307899	0.372872	0.320274	0.240693	0.342734	0.0267112		58.3669	0.38447	0.291323	0.311421	0.10649	0.229004	0.314047	0.313324	0.389599	0.37117	0.301205	0.0296466
	58.8301	0.49137	0.273415	0.138694	0.167489	0.112157	0.046906	-0.0466465	0.186273	0.171207	0.0567964		58.8301	0.418966	0.41062	0.324634	0.370517	0.321558	0.218846	0.34419	0.0301679		58.8301	0.386192	0.288116	0.26954	0.104857	0.230829	0.317715	0.315892	0.401143	0.377248	0.299059	0.0307587
	59.2934	0.47824	0.267556	0.132931	0.171104	0.113981	0.0493327	-0.0570334	0.181046	0.167145	0.0559343		59.2934	0.398464	0.370459	0.325052	0.36548	0.317715	0.236753	0.335654	0.0232822		59.2934	0.377693	0.290392	0.243464	0.106838	0.233548	0.315171	0.315953	0.406981	0.383667	0.297078	0.0311594
	59.7566	0.471585	0.269948	0.121261	0.166482	0.105319	0.049827	-0.0532758	0.171332	0.16281	0.0553231		59.7566	0.386386	0.398835	0.29629	0.364888	0.337194	0.240644	0.337373	0.0244822		59.7566	0.38244	0.287735	0.234042	0.10101	0.231957	0.317878	0.317463	0.396391	0.384284	0.2948	0.0316886
	60.2198	0.481565	0.267734	0.120364	0.16039	0.0957724	0.0536672	-0.0500743	0.169559	0.162372	0.0560917		60.2198	0.38211	0.381716	0.277489	0.361734	0.321014	0.251355	0.329236	0.0226692		60.2198	0.378374	0.284683	0.19361	0.0947839	0.237737	0.314986	0.331847	0.396431	0.384494	0.290772	0.0334575
	60.683	0.475859	0.262729	0.121366	0.163282	0.0909722	0.0497896	-0.0594058	0.172204	0.1596	0.0562237		60.683	0.374124	0.383984	0.271733	0.375947	0.319954	0.264625	0.331728	0.0221542		60.683	0.377114	0.288689	0.187281	0.0916719	0.235037	0.318782	0.332374	0.41077	0.383141	0.291651	0.0346323
	61.1463	0.465948	0.269193	0.116021	0.171392	0.0883812	0.0526944	-0.0599148	0.162911	0.158328	0.0555144		61.1463	0.383399	0.365982	0.271031	0.373624	0.296804	0.259352	0.325032	0.0227094		61.1463	0.383302	0.290624	0.162581	0.0901301	0.23383	0.321151	0.328103	0.415315	0.377987	0.289225	0.0361146
	61.6095	0.446391	0.275984	0.121456	0.17334	0.0898316	0.0497581	-0.0646082	0.158811	0.15637	0.0542082		61.6095	0.355481	0.368796	0.260503	0.347383	0.282411	0.281444	0.316003	0.0189149		61.6095	0.380389	0.295112	0.169777	0.0869495	0.233726	0.32034	0.332499	0.415543	0.380512	0.290539	0.0360794
	62.0727	0.450223	0.265331	0.120171	0.169008	0.0801146	0.048732	-0.0664911	0.165865	0.154119	0.0545779		62.0727	0.371908	0.37383	0.251666	0.344001	0.28109	0.286135	0.318105	0.0211951		62.0727	0.372742	0.298319	0.135102	0.0878986	0.240955	0.320446	0.337987	0.405808	0.389949	0.28769	0.0374058
	62.536	0.454491	0.25629	0.124336	0.168942	0.0845699	0.0499721	-0.0693723	0.168105	0.154667	0.0547061		62.536	0.349498	0.361554	0.24734	0.345255	0.253974	0.246373	0.300666	0.0231313		62.536	0.371359	0.29341	0.116286	0.0875499	0.23915	0.325672	0.351242	0.403982	0.36326	0.283546	0.0378936
	62.9992	0.454618	0.259696	0.127729	0.170574	0.0771922	0.0544323	-0.0661879	0.174259	0.156539	0.0546355		62.9992	0.350311	0.375479	0.249372	0.330525	0.253696	0.232513	0.298649	0.0247729		62.9992	0.355982	0.294031	0.0973191	0.07735	0.235839	0.314636	0.356899	0.405821	0.357167	0.277227	0.0392975
	63.4624	0.470467	0.256966	0.139776	0.169608	0.0737985	0.0545453	-0.0594519	0.173551	0.159908	0.0556115		63.4624	0.361995	0.374757	0.247727	0.321041	0.236762	0.257378	0.299943	0.0247809		63.4624	0.360128	0.299377	0.0917338	0.0756093	0.236229	0.315075	0.355074	0.399749	0.353628	0.276289	0.0395171
	63.9256	0.462109	0.262979	0.124473	0.163829	0.065704	0.0506437	-0.0556875	0.182282	0.157042	0.055251		63.9256	0.356335	0.368748	0.251118	0.321528	0.248822	0.279538	0.304348	0.0213521		63.9256	0.358654	0.310033	0.10548	0.0771147	0.231226	0.314125	0.358688	0.407463	0.339416	0.278022	0.038763
	64.3889	0.46236	0.249776	0.134769	0.157861	0.0717991	0.050969	-0.0493776	0.182862	0.157627	0.0541338		64.3889	0.348966	0.380628	0.248544	0.329993	0.250074	0.277283	0.305915	0.0225421		64.3889	0.360819	0.315734	0.0807844	0.0737144	0.233266	0.30951	0.359648	0.408119	0.331543	0.274793	0.0405303
	64.8521	0.457103	0.237333	0.136609	0.15701	0.0736951	0.0475113	-0.0650349	0.192655	0.15461	0.0545082		64.8521	0.353439	0.369691	0.248418	0.337391	0.238603	0.231075	0.296436	0.0259586		64.8521	0.353355	0.31402	0.0662213	0.0814598	0.23645	0.311908	0.372923	0.393847	0.3386	0.274309	0.0407074
	65.3153	0.455038	0.243104	0.141748	0.14885	0.0665507	0.0529349	-0.0479123	0.187496	0.155976	0.0531945		65.3153	0.348627	0.331615	0.256186	0.350767	0.222515	0.239423	0.291522	0.023877		65.3153	0.358951	0.31292	0.0436375	0.0812485	0.23252	0.31141	0.362092	0.387488	0.340151	0.270046	0.0419898
	65.7786	0.474777	0.247691	0.155311	0.150461	0.0636456	0.0494705	-0.0556805	0.184484	0.15877	0.0559805		65.7786	0.349089	0.3607	0.251884	0.376991	0.233259	0.243873	0.302633	0.0270186		65.7786	0.353448	0.301615	0.0449535	0.0798335	0.230871	0.312591	0.357798	0.3877	0.339072	0.267542	0.0415658
	66.2418	0.471863	0.243031	0.153034	0.143091	0.0690556	0.0447875	-0.0544736	0.187138	0.157191	0.0555338		66.2418	0.36193	0.359941	0.25474	0.407857	0.243247	0.199271	0.304498	0.0338406		66.2418	0.347382	0.288931	0.0350474	0.0769138	0.222792	0.312006	0.358424	0.383496	0.343616	0.263179	0.0422501
	66.705	0.47399	0.233709	0.16461	0.140935	0.057026	0.044185	-0.053991	0.186753	0.155902	0.0558694		66.705	0.370058	0.35665	0.251254	0.39942	0.240282	0.225672	0.307223	0.0311746		66.705	0.349418	0.28616	0.0403242	0.0755522	0.222647	0.308879	0.359229	0.381525	0.342461	0.262911	0.0418465
	67.1683	0.480294	0.232205	0.150798	0.140765	0.0544771	0.0433361	-0.0535825	0.182421	0.153839	0.0565084		67.1683	0.348565	0.363256	0.253692	0.362611	0.227643	0.251664	0.301238	0.0258116		67.1683	0.348237	0.279765	0.00684247	0.0764406	0.217409	0.309493	0.34497	0.359556	0.34197	0.253854	0.0430976
	67.6315	0.476788	0.242463	0.154988	0.144623	0.0571727	0.039059	-0.0696681	0.175923	0.152669	0.0575058		67.6315	0.339267	0.3563	0.256288	0.33109	0.214872	0.246066	0.290647	0.023958		67.6315	0.348896	0.281456	0.0173476	0.0753528	0.213345	0.303329	0.335086	0.365769	0.342075	0.253629	0.0422604
	68.0947	0.475595	0.242712	0.156586	0.152496	0.0536763	0.0427617	-0.0666276	0.180362	0.154695	0.0571822		68.0947	0.333643	0.351541	0.26549	0.335331	0.219712	0.24059	0.291051	0.022893		68.0947	0.350498	0.278573	0.00890035	0.0767273	0.22135	0.296578	0.324337	0.363823	0.340997	0.251309	0.0422962
	68.5579	0.47011	0.236713	0.158605	0.154667	0.0551292	0.0418021	-0.06247	0.172453	0.153376	0.0561167		68.5579	0.340493	0.353397	0.254686	0.330768	0.214885	0.185173	0.2799	0.0291528		68.5579	0.342654	0.282911	0.0254614	0.0728268	0.214298	0.296631	0.314726	0.36135	0.342739	0.2504	0.0408439
	69.0212	0.456606	0.236392	0.165168	0.155404	0.0472132	0.0359513	-0.0523667	0.170449	0.151852	0.0545509		69.0212	0.35701	0.365007	0.253614	0.327753	0.21417	0.158142	0.279283	0.034309		69.0212	0.338948	0.279505	0.0182755	0.0677758	0.216659	0.295276	0.31871	0.354971	0.347766	0.248654	0.041521
	69.4844	0.451166	0.241572	0.154891	0.150893	0.053473	0.0361764	-0.0428048	0.173867	0.152404	0.0532985		69.4844	0.353685	0.349819	0.261732	0.327668	0.187749	0.168451	0.274851	0.0335183		69.4844	0.324844	0.268158	0.00517737	0.0624964	0.213245	0.290482	0.325052	0.353381	0.351113	0.243772	0.0425265
	69.9476	0.457652	0.246245	0.153171	0.142161	0.0443387	0.0376544	-0.0439334	0.171256	0.151068	0.0544163		69.9476	0.33579	0.356469	0.25762	0.319243	0.184894	0.175832	0.271641	0.0318737		69.9476	0.324629	0.252266	0.0178279	0.0559084	0.211349	0.288737	0.319028	0.35817	0.353699	0.242402	0.0419729
	70.4109	0.439463	0.247575	0.166702	0.135429	0.0411835	0.0370054	-0.0431747	0.168725	0.149114	0.0527918		70.4109	0.343884	0.369632	0.249898	0.324033	0.197119	0.166667	0.275205	0.0339292		70.4109	0.328252	0.252043	-0.00729565	0.0583717	0.2041	0.288863	0.329403	0.365856	0.336721	0.23959	0.0439286
	70.8741	0.437155	0.24585	0.162278	0.133944	0.0535424	0.0334904	-0.0413322	0.16028	0.148151	0.0520334		70.8741	0.370755	0.35463	0.258127	0.322535	0.183235	0.15481	0.274015	0.03693		70.8741	0.322849	0.252425	-0.00467103	0.0579074	0.208619	0.292626	0.314241	0.362995	0.341888	0.238764	0.0432694
	71.3373	0.444536	0.22408	0.151301	0.13271	0.0442847	0.0311399	-0.0503736	0.162306	0.142498	0.0530657		71.3373	0.363557	0.335851	0.252776	0.303878	0.182336	0.161695	0.266682	0.0336067		71.3373	0.317584	0.250872	0.00300931	0.0551333	0.199185	0.288029	0.328395	0.359071	0.33833	0.237734	0.0428279
	71.8005	0.445283	0.230334	0.147871	0.127563	0.0458796	0.0284343	-0.0481248	0.162712	0.142494	0.0532409		71.8005	0.345763	0.330875	0.252627	0.290919	0.181898	0.174172	0.262709	0.0298949		71.8005	0.31574	0.24428	-0.00340301	0.0557683	0.197413	0.286134	0.323636	0.373895	0.330333	0.235977	0.0434326
	72.2638	0.448136	0.23456	0.137573	0.115913	0.0490663	0.0241968	-0.0517781	0.164282	0.140244	0.0540374		72.2638	0.344438	0.336599	0.246964	0.30441	0.171834	0.192048	0.266049	0.030172		72.2638	0.321614	0.245127	0.00313382	0.0566813	0.193178	0.288518	0.32647	0.361452	0.342173	0.237594	0.0430696
	72.727	0.450571	0.232382	0.138718	0.115358	0.0427039	0.0296459	-0.0431899	0.155371	0.140195	0.0536252		72.727	0.335036	0.380864	0.250504	0.309945	0.166539	0.17507	0.26966	0.0356891		72.727	0.321569	0.244454	0.0125965	0.0674014	0.197115	0.285823	0.337144	0.358398	0.327939	0.23916	0.0413818
	73.1902	0.442417	0.226754	0.123501	0.10537	0.0436443	0.0335227	-0.0501906	0.151147	0.134521	0.0529711		73.1902	0.314162	0.374367	0.243772	0.306268	0.170167	0.189227	0.266327	0.032278		73.1902	0.32572	0.246288	0.00473898	0.0517287	0.203136	0.279588	0.33206	0.357956	0.320371	0.235732	0.0424578
	73.6535	0.437245	0.222529	0.122332	0.0964569	0.0514332	0.0354184	-0.0607153	0.156813	0.132689	0.0528301		73.6535	0.325826	0.364875	0.233376	0.30339	0.163379	0.20318	0.265671	0.0317776		73.6535	0.322331	0.250864	0.00439628	0.0505607	0.19938	0.280447	0.314296	0.359265	0.319893	0.233493	0.0420523
	74.1167	0.431872	0.236787	0.127207	0.0997486	0.0500313	0.0295003	-0.0531625	0.160667	0.135331	0.0524762		74.1167	0.313833	0.367667	0.238968	0.303111	0.16172	0.151413	0.256119	0.0356608		74.1167	0.329788	0.249445	0.00151648	0.0510682	0.198306	0.274121	0.327109	0.351482	0.324543	0.234153	0.0425701
	74.5799	0.438822	0.237331	0.126684	0.0993332	0.0399024	0.0333875	-0.0749245	0.161353	0.132736	0.0548066		74.5799	0.311575	0.356776	0.239065	0.295885	0.170366	0.129348	0.250503	0.0357372		74.5799	0.328041	0.244597	0.00572901	0.0408185	0.196311	0.275134	0.322943	0.365135	0.318941	0.233072	0.04311
	75.0432	0.447789	0.242544	0.124287	0.0954929	0.0490698	0.0343352	-0.0784166	0.165808	0.135114	0.0559163		75.0432	0.296073	0.336676	0.226084	0.289945	0.185198	0.142306	0.246047	0.0302801		75.0432	0.322765	0.247781	-0.00793451	0.0382448	0.195064	0.275503	0.329405	0.363301	0.319025	0.231461	0.0442769
	75.5064	0.450288	0.242667	0.133801	0.0886004	0.0457623	0.0407682	-0.0776917	0.164838	0.136129	0.0560794		75.5064	0.33101	0.350045	0.228357	0.290436	0.170494	0.115558	0.24765	0.037876		75.5064	0.31349	0.24646	-0.0127343	0.0339374	0.192592	0.269132	0.314784	0.354509	0.323794	0.226218	0.043921
	75.9696	0.448631	0.241995	0.13555	0.0835796	0.0363529	0.0344617	-0.0844198	0.160004	0.132019	0.0568512		75.9696	0.305669	0.340219	0.233823	0.291628	0.162842	0.102611	0.239465	0.0373663		75.9696	0.303745	0.242545	0.00101353	0.0354395	0.192999	0.270341	0.321484	0.347244	0.318447	0.225918	0.0422738
	76.4328	0.448221	0.230034	0.133242	0.0817973	0.0444198	0.032586	-0.0832367	0.163244	0.131288	0.0562171		76.4328	0.283847	0.329659	0.217245	0.307159	0.156613	0.129915	0.237406	0.0336756		76.4328	0.307895	0.236854	0.0105394	0.0364316	0.1921	0.271615	0.322729	0.352742	0.309691	0.226733	0.0416389
	76.8961	0.444125	0.235818	0.151038	0.0778647	0.0559971	0.0410743	-0.0853427	0.16412	0.135587	0.0556943		76.8961	0.279924	0.33058	0.221934	0.323542	0.164163	0.0985914	0.236456	0.0377609		76.8961	0.296136	0.232996	-0.00758411	0.0351647	0.189876	0.268188	0.321404	0.352387	0.304212	0.22142	0.0424978
	77.3593	0.438155	0.243969	0.145798	0.0770064	0.0411802	0.0399545	-0.0930903	0.165672	0.132331	0.0563791		77.3593	0.280031	0.30751	0.218646	0.321558	0.170244	0.0990115	0.232833	0.035451		77.3593	0.294115	0.238831	-0.0468046	0.0367541	0.18556	0.267802	0.3224	0.347404	0.316753	0.21809	0.045663
	77.8225	0.44672	0.230557	0.147833	0.0745827	0.0367943	0.0373798	-0.0877428	0.163076	0.13115	0.0566274		77.8225	0.279687	0.296636	0.220069	0.306691	0.156077	0.131573	0.231789	0.0305628		77.8225	0.290928	0.238887	-0.0583386	0.0306726	0.191099	0.2672	0.309603	0.346643	0.301658	0.21315	0.045959
	78.2858	0.431152	0.235894	0.135838	0.0743633	0.0373608	0.0403553	-0.0927353	0.160365	0.127824	0.0554445		78.2858	0.283305	0.288472	0.214982	0.29139	0.16954	0.184015	0.238617	0.0227883		78.2858	0.289754	0.239904	-0.0690555	0.0341556	0.180497	0.261728	0.313099	0.339817	0.275588	0.207276	0.0458426
	78.749	0.428118	0.236073	0.13196	0.0751831	0.0429871	0.0350705	-0.10841	0.161015	0.12525	0.056274		78.749	0.27072	0.27736	0.218801	0.301524	0.168197	0.176073	0.235446	0.0228705		78.749	0.281283	0.243702	-0.0504144	0.0330774	0.183503	0.259343	0.304199	0.337037	0.261958	0.205966	0.0434672
	79.2122	0.421388	0.242926	0.125477	0.0793468	0.039185	0.0338591	-0.104031	0.15605	0.124275	0.0555689		79.2122	0.291014	0.301967	0.206728	0.295088	0.159225	0.141397	0.23257	0.029721		79.2122	0.286032	0.240372	-0.0442775	0.0416225	0.189756	0.26209	0.295982	0.327632	0.258682	0.206432	0.0418861
	79.6754	0.407258	0.233194	0.102482	0.0749168	0.0313522	0.0313883	-0.0982369	0.153276	0.116954	0.053792		79.6754	0.283819	0.303523	0.204275	0.281836	0.178219	0.167903	0.236596	0.0244453		79.6754	0.276833	0.242275	-0.0376047	0.0364348	0.192115	0.264582	0.290288	0.333765	0.270005	0.207633	0.041759
	80.1387	0.416988	0.237999	0.0971216	0.0726205	0.0325993	0.0230122	-0.10799	0.153063	0.115677	0.0558797		80.1387	0.2724	0.278915	0.212703	0.279116	0.179463	0.135849	0.226408	0.0246597		80.1387	0.27582	0.23873	-0.0375785	0.0397854	0.188089	0.259237	0.281134	0.345811	0.277794	0.207647	0.0418962
	80.6019	0.409815	0.221728	0.0879434	0.0740588	0.035265	0.0202062	-0.104606	0.155903	0.112539	0.0544304		80.6019	0.281229	0.26001	0.201308	0.262431	0.188034	0.163464	0.226079	0.0195755		80.6019	0.273579	0.241579	-0.0516135	0.0403698	0.179274	0.254099	0.279273	0.342827	0.269556	0.203216	0.0426091
	81.0651	0.410824	0.228588	0.070326	0.0703988	0.036704	0.0201021	-0.104245	0.15587	0.111071	0.0549594		81.0651	0.27364	0.27414	0.197975	0.242381	0.19068	0.168784	0.2246	0.018394		81.0651	0.266783	0.245948	-0.0662589	0.0383464	0.18009	0.251664	0.274268	0.335237	0.273353	0.199937	0.0434371
	81.5284	0.407285	0.219696	0.0592161	0.0725262	0.036912	0.0242651	-0.101083	0.161572	0.110049	0.0541663		81.5284	0.278731	0.251619	0.199881	0.244035	0.188346	0.159666	0.22038	0.0183238		81.5284	0.267865	0.24781	-0.0687188	0.0385662	0.180321	0.24805	0.278455	0.330771	0.284811	0.200881	0.0438274
	81.9916	0.404665	0.211086	0.0409294	0.0705475	0.0375045	0.0204398	-0.0876825	0.167234	0.10809	0.0532807		81.9916	0.300893	0.230591	0.197826	0.268917	0.189752	0.145044	0.222171	0.0231268		81.9916	0.272018	0.245907	-0.0731834	0.0503423	0.171516	0.25135	0.276016	0.346409	0.266718	0.200788	0.0440057
	82.4548	0.394211	0.20601	0.0398482	0.0683737	0.0311395	0.0176809	-0.0926433	0.163925	0.103568	0.0526157		82.4548	0.317647	0.244135	0.209194	0.2645	0.192983	0.11499	0.223908	0.0282134		82.4548	0.269522	0.241629	-0.0983204	0.0497044	0.176162	0.249062	0.258917	0.348601	0.254166	0.194383	0.0455413
	82.918	0.396626	0.217761	0.0312548	0.069797	0.0275889	0.0135036	-0.0965289	0.161036	0.10263	0.0538701		82.918	0.305734	0.262947	0.206205	0.250395	0.199922	0.104133	0.221556	0.0283565		82.918	0.268222	0.243492	-0.0917806	0.0491555	0.167129	0.250436	0.246565	0.344364	0.250223	0.191978	0.0445678
	83.3813	0.387595	0.19886	0.014946	0.0688288	0.0291648	0.0200473	-0.0909721	0.154918	0.0979234	0.052022		83.3813	0.301817	0.237521	0.194456	0.240212	0.207964	0.0972297	0.2132	0.0276899		83.3813	0.268423	0.245189	-0.0862161	0.0502616	0.166354	0.251672	0.248367	0.336273	0.243466	0.191532	0.0436241
	83.8445	0.375853	0.205499	0.0189717	0.0721675	0.0256926	0.0191236	-0.0908207	0.142478	0.0961206	0.0508366		83.8445	0.294262	0.258309	0.194798	0.229028	0.20371	0.139403	0.219918	0.0219547		83.8445	0.269468	0.239356	-0.0988101	0.0579251	0.17683	0.254581	0.244268	0.334902	0.240019	0.190949	0.0441565
	84.3077	0.373498	0.209427	0.02202	0.0680294	0.023001	0.0155205	-0.0882187	0.140754	0.0955039	0.0506862		84.3077	0.304903	0.245153	0.190377	0.235642	0.18328	0.106573	0.210988	0.0275016		84.3077	0.273076	0.245421	-0.105529	0.0534642	0.175043	0.250691	0.245063	0.325839	0.238961	0.189114	0.0446801
	84.771	0.362799	0.206877	0.0278736	0.0659417	0.0242912	0.0155775	-0.0850109	0.14266	0.0951261	0.0492019		84.771	0.321061	0.238417	0.201914	0.247338	0.194159	0.0987871	0.216946	0.0299618		84.771	0.276815	0.241701	-0.0887566	0.0465735	0.164673	0.251691	0.239292	0.326647	0.23782	0.188495	0.0435095
	85.2342	0.356501	0.203102	0.0303188	0.0630408	0.0216709	0.0116998	-0.0978513	0.139234	0.0909645	0.0493906		85.2342	0.318174	0.260445	0.201723	0.246523	0.176813	0.0860448	0.214954	0.0326434		85.2342	0.278464	0.237267	-0.0914065	0.0472191	0.167403	0.254311	0.241433	0.329356	0.228149	0.188022	0.043743
	85.6974	0.358726	0.196054	0.0420591	0.0654789	0.0178258	0.00590041	-0.0851415	0.137016	0.0922399	0.0484561		85.6974	0.290251	0.246088	0.197392	0.240379	0.157824	0.112667	0.207434	0.0264455		85.6974	0.270093	0.231428	-0.0945917	0.044527	0.16471	0.256666	0.231299	0.315838	0.209382	0.181039	0.0429088
	86.1607	0.349064	0.201096	0.0395655	0.06421	0.0140653	-0.000159187	-0.0855653	0.13629	0.0898208	0.0480932		86.1607	0.291597	0.2606	0.195667	0.252946	0.188002	0.091561	0.213395	0.029275		86.1607	0.274541	0.228872	-0.0869237	0.0400805	0.165574	0.259089	0.221873	0.324762	0.224567	0.183604	0.0430107
	86.6239	0.343709	0.193436	0.050832	0.0660962	0.0154505	0.00436766	-0.0854575	0.131051	0.0899356	0.0467772		86.6239	0.290386	0.226013	0.18988	0.247231	0.183952	0.0820489	0.203252	0.0290321		86.6239	0.282583	0.224846	-0.0708619	0.0340728	0.175128	0.258947	0.227651	0.315215	0.220262	0.185316	0.0416563
	87.0871	0.339454	0.202507	0.0684905	0.0675402	0.0135695	0.00251078	-0.0932054	0.127696	0.0910703	0.0471176		87.0871	0.271911	0.25554	0.197027	0.242885	0.175995	0.112917	0.209379	0.0243144		87.0871	0.279294	0.224089	-0.0733763	0.0317886	0.171861	0.253077	0.231558	0.314571	0.205492	0.182039	0.041626
	87.5503	0.335839	0.186779	0.0688497	0.0663166	0.00821979	-0.00342015	-0.0983545	0.131412	0.0869552	0.0469317		87.5503	0.271569	0.244341	0.188276	0.258324	0.150121	0.120689	0.205553	0.0253117		87.5503	0.27199	0.223518	-0.0888785	0.035604	0.165607	0.255491	0.22669	0.315987	0.230836	0.181872	0.04292
	88.0136	0.336835	0.192557	0.0738729	0.0647121	0.00586497	-0.00763514	-0.0936578	0.134319	0.0883584	0.0471754		88.0136	0.249362	0.255073	0.18941	0.260879	0.154937	0.0759158	0.197596	0.0298222		88.0136	0.266153	0.217133	-0.0782591	0.0331587	0.174313	0.251346	0.229562	0.305749	0.246329	0.182832	0.0416301
	88.4768	0.329902	0.188439	0.0787943	0.0657759	-0.00876278	-0.0133858	-0.0928056	0.133568	0.0851907	0.0469668		88.4768	0.256005	0.235967	0.183241	0.248672	0.150323	0.049405	0.187269	0.032277		88.4768	0.262857	0.218964	-0.0650986	0.0284814	0.172674	0.249552	0.2296	0.308045	0.24348	0.183173	0.0406716
	88.94	0.335872	0.172286	0.0786165	0.0640671	-0.0123844	-0.0156135	-0.0885318	0.13825	0.0840703	0.0469771		88.94	0.265955	0.24819	0.182374	0.237879	0.15609	0.0621614	0.192108	0.0310761		88.94	0.263627	0.220024	-0.0669726	0.0208804	0.16606	0.248813	0.230292	0.307193	0.24939	0.182145	0.0413858
	89.4033	0.339627	0.172798	0.0794517	0.0623522	-0.0128815	-0.0215524	-0.102056	0.124957	0.080337	0.0482615		89.4033	0.24835	0.251603	0.185315	0.240183	0.15568	0.114872	0.199334	0.0231223		89.4033	0.266587	0.215433	-0.0735936	0.0221161	0.159461	0.251894	0.234692	0.314109	0.246693	0.181932	0.0423233
	89.8665	0.32715	0.160446	0.0809079	0.0625475	-0.0158989	-0.0254232	-0.0996876	0.129114	0.0773944	0.046831		89.8665	0.215491	0.232245	0.183123	0.244045	0.157186	0.118262	0.191725	0.0196705		89.8665	0.262102	0.214367	-0.0804975	0.0197579	0.161023	0.24688	0.237593	0.3065	0.2461	0.179314	0.0424878
	90.3297	0.326919	0.156958	0.0734579	0.057718	-0.0151466	-0.0194454	-0.0947971	0.130655	0.0770399	0.0461796		90.3297	0.203112	0.259648	0.184793	0.240222	0.149437	0.0415474	0.179793	0.0319534		90.3297	0.259274	0.224084	-0.0623803	0.0165832	0.169054	0.252106	0.239557	0.308757	0.258792	0.185092	0.0416834
	90.7929	0.337399	0.151332	0.0821162	0.0589179	-0.0146293	-0.0268182	-0.109908	0.13581	0.0767775	0.0484128		90.7929	0.212456	0.257648	0.190357	0.236045	0.142783	0.0631442	0.183739	0.029033		90.7929	0.255653	0.227964	-0.072047	0.00747115	0.173375	0.248657	0.239001	0.310084	0.245632	0.181755	0.0426156
	91.2562	0.33348	0.159318	0.0902783	0.0556485	-0.0205922	-0.0339847	-0.109829	0.136739	0.0763822	0.048826		91.2562	0.195762	0.272165	0.176308	0.236205	0.153527	0.116421	0.191731	0.0229731		91.2562	0.255278	0.231083	-0.0817818	0.0134	0.171779	0.247879	0.244501	0.309556	0.243493	0.181687	0.0431708
	91.7194	0.327199	0.166822	0.0877439	0.0524473	-0.0114372	-0.0335694	-0.115618	0.140699	0.0767858	0.0486591		91.7194	0.186176	0.259921	0.176506	0.252728	0.148414	0.0827332	0.184413	0.0271225		91.7194	0.249325	0.230359	-0.0883898	0.00970454	0.164917	0.24993	0.244344	0.311989	0.259197	0.181264	0.0443021
	92.1826	0.304406	0.16054	0.0788602	0.0548828	-0.0154508	-0.0359416	-0.114436	0.136684	0.0711931	0.0463736		92.1826	0.180988	0.275846	0.173693	0.253891	0.143958	0.0892583	0.186272	0.0282749		92.1826	0.244043	0.226097	-0.0878274	0.0129432	0.164958	0.255804	0.247916	0.318885	0.251661	0.181609	0.0442298
	92.6459	0.322184	0.159291	0.079209	0.0506161	-0.0157217	-0.0364611	-0.101824	0.143356	0.075081	0.047323		92.6459	0.189363	0.304803	0.17499	0.238403	0.151866	0.105201	0.194104	0.028456		92.6459	0.238418	0.223929	-0.0841654	0.0234615	0.169051	0.258201	0.256689	0.319583	0.250066	0.183915	0.0434616
	93.1091	0.321097	0.151191	0.0734536	0.0545927	-0.00792528	-0.0329596	-0.103589	0.146674	0.0753168	0.0467421		93.1091	0.197211	0.289088	0.176077	0.241468	0.170281	0.0567793	0.188484	0.0320603		93.1091	0.244948	0.217675	-0.0966093	0.015575	0.162031	0.247552	0.259355	0.320287	0.254826	0.180627	0.0449761
	93.5723	0.32252	0.150042	0.0701351	0.0533172	-0.0129082	-0.0391113	-0.105248	0.151577	0.0737905	0.0475249		93.5723	0.184937	0.27109	0.161316	0.248692	0.156754	0.0693238	0.182019	0.0295266		93.5723	0.242647	0.211908	-0.122316	0.0069882	0.15841	0.250077	0.252596	0.331309	0.235694	0.174146	0.0475227
	94.0356	0.323712	0.154302	0.0733692	0.0523401	-0.0114632	-0.0389044	-0.105036	0.145325	0.0742058	0.0475218		94.0356	0.165373	0.301909	0.160745	0.244092	0.151311	0.0777049	0.183523	0.0320246		94.0356	0.237157	0.215352	-0.105081	0.00786914	0.159762	0.255881	0.263333	0.342481	0.219603	0.177373	0.0466124
	94.4988	0.316657	0.148899	0.062917	0.0514761	-0.0144108	-0.0347772	-0.109759	0.140919	0.0702403	0.0468478		94.4988	0.186627	0.303506	0.14694	0.24028	0.155181	0.0647497	0.182881	0.0336022		94.4988	0.230417	0.210682	-0.0771656	0.00576871	0.154401	0.26023	0.255983	0.344755	0.21039	0.177273	0.044228
	94.962	0.332445	0.140619	0.06216	0.0506708	-0.00879243	-0.0405466	-0.104744	0.155417	0.0734036	0.0482677		94.962	0.197131	0.288485	0.148159	0.246036	0.153002	0.0778876	0.185117	0.0307873		94.962	0.232417	0.201634	-0.0872625	0.00240258	0.152184	0.259382	0.242975	0.354958	0.210317	0.174334	0.0454098
	95.4252	0.331629	0.135967	0.0654742	0.0518717	-0.00626013	-0.0384295	-0.104248	0.147326	0.0729162	0.0476214		95.4252	0.198037	0.294512	0.172154	0.275496	0.165469	0.095952	0.20027	0.0302376		95.4252	0.220986	0.201227	-0.0824669	0.00625803	0.150346	0.259073	0.250321	0.362705	0.214537	0.175887	0.0452929
	95.8885	0.331298	0.135671	0.0628982	0.0525369	-0.02054	-0.0286099	-0.116868	0.148545	0.0706165	0.0485416		95.8885	0.20438	0.280319	0.171528	0.271765	0.181053	0.0882504	0.199549	0.029027		95.8885	0.224721	0.206936	-0.0940802	0.00501303	0.143368	0.251363	0.244014	0.354951	0.19879	0.170564	0.0455153
	96.3517	0.328791	0.133518	0.0585115	0.0511349	-0.0094398	-0.0283433	-0.111679	0.15194	0.0718042	0.0476544		96.3517	0.184584	0.290688	0.152276	0.270088	0.183569	0.107429	0.198106	0.0285596		96.3517	0.227159	0.19839	-0.106677	-0.00239652	0.141744	0.250358	0.231094	0.359932	0.199041	0.166516	0.0468657
	96.8149	0.331476	0.134448	0.0455563	0.0532559	-0.0174718	-0.0247392	-0.115436	0.151659	0.0698435	0.0483813		96.8149	0.168277	0.275229	0.149623	0.260423	0.166566	0.0991477	0.186544	0.0277232		96.8149	0.223621	0.192465	-0.107193	0.00669381	0.137969	0.248501	0.219421	0.364585	0.195034	0.164566	0.0463591
	97.2782	0.326351	0.128901	0.0345127	0.0580974	-0.0166326	-0.0270424	-0.114997	0.154973	0.0680204	0.0479809		97.2782	0.181045	0.277337	0.160133	0.263081	0.15413	0.0968153	0.188757	0.0282262		97.2782	0.220778	0.188385	-0.116984	0.00484635	0.138805	0.248253	0.222829	0.363917	0.168309	0.159904	0.047012
	97.7414	0.324324	0.126133	0.0308361	0.0613172	-0.00898762	-0.0203095	-0.112888	0.148094	0.068565	0.0469357		97.7414	0.175053	0.261425	0.166801	0.260282	0.169944	0.100818	0.189054	0.0252672		97.7414	0.221542	0.187907	-0.102145	0.00542293	0.130931	0.24527	0.217274	0.372017	0.183507	0.162414	0.0462523
	98.2046	0.320823	0.130123	0.0316499	0.0603765	-0.0182471	-0.0139576	-0.110672	0.148938	0.0686293	0.046634		98.2046	0.174404	0.256364	0.14881	0.255753	0.161798	0.097	0.182355	0.0256652		98.2046	0.214108	0.187555	-0.108281	-0.00324833	0.133112	0.248285	0.209473	0.371253	0.180321	0.159175	0.046891
	98.6678	0.32518	0.142906	0.0317821	0.0646184	-0.0139343	-0.0151898	-0.108016	0.143333	0.0713348	0.0469188		98.6678	0.181912	0.233839	0.144249	0.244592	0.174665	0.086513	0.177629	0.0238658		98.6678	0.211813	0.176594	-0.131388	-0.00420922	0.129444	0.247787	0.199012	0.358155	0.162996	0.150023	0.0476346
	99.1311	0.333507	0.144736	0.021898	0.0714742	-0.00855182	-0.0134962	-0.111775	0.143978	0.0727212	0.0479834		99.1311	0.183374	0.225301	0.150346	0.232403	0.178687	0.0849414	0.175842	0.022078		99.1311	0.213609	0.17071	-0.113632	0.000236043	0.125636	0.240381	0.206688	0.349494	0.150543	0.149296	0.0453651
	99.5943	0.326439	0.119331	0.0330462	0.0838507	-0.00183173	-0.0127991	-0.0978934	0.1367	0.0733553	0.0451811		99.5943	0.167912	0.262074	0.148271	0.24069	0.127133	0.0701887	0.169378	0.0292966		99.5943	0.215249	0.172353	-0.129368	0.000141463	0.128763	0.239621	0.20997	0.349457	0.150693	0.148542	0.046712
	100.058	0.31692	0.121889	0.042311	0.101258	-0.00600077	-0.013103	-0.102353	0.144737	0.0757072	0.044944		100.058	0.167047	0.229254	0.163351	0.249126	0.128012	0.099415	0.172701	0.0234708		100.058	0.218106	0.171737	-0.122193	-0.00130696	0.133799	0.24096	0.203587	0.341775	0.153036	0.148833	0.0456856
	100.521	0.321934	0.122339	0.0595554	0.0895243	-0.00642175	-0.0171549	-0.106722	0.151902	0.0768696	0.0458448		100.521	0.190309	0.209068	0.193769	0.263394	0.123447	0.109909	0.181649	0.0232308		100.521	0.213441	0.172707	-0.118424	0.00548298	0.135271	0.232447	0.205607	0.333298	0.156879	0.148523	0.0442859
	100.984	0.312728	0.122859	0.0529751	0.0743908	-0.00730796	-0.0169802	-0.111579	0.143789	0.0713593	0.0451116		100.984	0.191495	0.205268	0.18439	0.258214	0.123476	0.108521	0.178561	0.0225086		100.984	0.216175	0.171296	-0.130218	0.0102087	0.123447	0.226299	0.190851	0.328141	0.150528	0.14297	0.0444693
	101.447	0.31472	0.119053	0.0561362	0.0634703	-0.0105062	-0.0202563	-0.104203	0.143899	0.0702891	0.0449133		101.447	0.186932	0.198383	0.179519	0.259842	0.127134	0.109761	0.176929	0.0219338		101.447	0.213069	0.168532	-0.110263	0.00158922	0.125478	0.224029	0.194374	0.336537	0.159485	0.14587	0.0435996
	101.91	0.323778	0.120568	0.0594579	0.0558422	-0.0160362	-0.0289321	-0.104244	0.143785	0.0692773	0.0463417		101.91	0.212702	0.183376	0.16895	0.269106	0.120297	0.0971738	0.175268	0.0254513		101.91	0.206541	0.170318	-0.109487	-0.00787262	0.130167	0.228834	0.185849	0.33254	0.167108	0.144889	0.0436429
	102.374	0.314325	0.115968	0.0554644	0.0506523	-0.010598	-0.0302524	-0.101226	0.146823	0.0676447	0.0451418		102.374	0.217668	0.182059	0.174405	0.292822	0.107437	0.076623	0.175169	0.0316204		102.374	0.212944	0.174564	-0.126307	-0.0121202	0.127898	0.22093	0.174233	0.327063	0.185613	0.142758	0.0449457
	102.837	0.322655	0.119213	0.0556826	0.0443037	-0.0124904	-0.0342455	-0.100512	0.141582	0.0670235	0.0460824		102.837	0.236202	0.190527	0.166444	0.331631	0.119228	0.113137	0.192862	0.0334747		102.837	0.215151	0.171382	-0.127929	-0.0120819	0.126843	0.225371	0.178383	0.330964	0.198329	0.145157	0.0456605
	103.3	0.325311	0.112448	0.0567052	0.0433449	-0.0110577	-0.0333655	-0.0989421	0.145958	0.0675502	0.0461733		103.3	0.223223	0.196049	0.168732	0.332592	0.111755	0.0952406	0.187932	0.0351195		103.3	0.218638	0.174195	-0.126891	-0.0121769	0.119367	0.225839	0.17091	0.323211	0.211896	0.144999	0.0454914
	103.763	0.32809	0.113768	0.0452774	0.0389869	-0.0226036	-0.0392105	-0.104158	0.145172	0.0631653	0.0474736		103.763	0.234657	0.191812	0.172592	0.3273	0.122389	0.0941847	0.190489	0.0341088		103.763	0.218296	0.174556	-0.134817	-0.0115013	0.113059	0.229512	0.162634	0.327502	0.210305	0.143283	0.0464062
	104.227	0.323161	0.115765	0.0540614	0.0378483	-0.0195752	-0.0345966	-0.113864	0.149851	0.0640815	0.0474979		104.227	0.24695	0.201871	0.168791	0.305053	0.125744	0.0973763	0.190964	0.0315032		104.227	0.220662	0.175885	-0.140995	-0.00873988	0.111413	0.237564	0.166158	0.318972	0.208008	0.143214	0.046616
	104.69	0.323016	0.111278	0.0499816	0.0401959	-0.0154545	-0.0385438	-0.116597	0.150411	0.063036	0.0476204		104.69	0.254661	0.194976	0.168705	0.283395	0.121089	0.103036	0.187644	0.029246		104.69	0.220776	0.176162	-0.148226	-0.0137208	0.113651	0.241215	0.158096	0.319137	0.217666	0.142751	0.0477053
	105.153	0.329931	0.115722	0.0315078	0.0345785	-0.012901	-0.0409238	-0.118041	0.1529	0.0615967	0.0487769		105.153	0.24706	0.197916	0.161457	0.260249	0.114346	0.126647	0.184613	0.0249207		105.153	0.217087	0.17295	-0.148597	-0.0156954	0.103228	0.241007	0.145263	0.318698	0.214722	0.13874	0.0476739
	105.616	0.320275	0.112306	0.010423	0.0327888	-0.0107018	-0.0333613	-0.122328	0.157062	0.0583079	0.0481875		105.616	0.259427	0.204908	0.156123	0.255451	0.105213	0.129961	0.18518	0.0265381		105.616	0.221047	0.174261	-0.163545	-0.0204579	0.106561	0.22929	0.144699	0.306775	0.204844	0.13372	0.0480748
	106.08	0.333364	0.118514	0.0104404	0.0362467	-0.0098501	-0.0378693	-0.125301	0.166123	0.0614584	0.0502158		106.08	0.259282	0.233911	0.140608	0.249029	0.112494	0.116449	0.185296	0.0282467		106.08	0.221761	0.170941	-0.140161	-0.0179953	0.105068	0.230245	0.152181	0.305272	0.180691	0.134223	0.0455336
	106.543	0.32424	0.125511	0.00255088	0.036185	-0.0128543	-0.043137	-0.137315	0.164618	0.0574747	0.050666		106.543	0.258848	0.264508	0.144631	0.248511	0.119176	0.0975235	0.188866	0.0312695		106.543	0.214907	0.159809	-0.146132	-0.0165472	0.102107	0.226341	0.151215	0.306267	0.172003	0.129997	0.0455166
	107.006	0.321825	0.117613	0.00197142	0.0332303	-0.0229165	-0.0397585	-0.137839	0.164584	0.0548388	0.0504705		107.006	0.267042	0.246129	0.132467	0.247452	0.123571	0.10719	0.187308	0.0299575		107.006	0.21457	0.157082	-0.174434	-0.0255231	0.0995915	0.219896	0.153534	0.32505	0.159032	0.125422	0.0490198
	107.469	0.322164	0.11705	-0.00977659	0.0365152	-0.013449	-0.0408986	-0.128707	0.161496	0.0555492	0.0497732		107.469	0.254151	0.254453	0.136798	0.242384	0.108751	0.0970209	0.18226	0.0309468		107.469	0.207755	0.153569	-0.159784	-0.025597	0.0991667	0.220583	0.142188	0.327477	0.161845	0.125245	0.0477114
	107.932	0.330359	0.112007	-0.0157419	0.0350442	-0.0178699	-0.0390388	-0.130207	0.164788	0.0549176	0.0508821		107.932	0.264536	0.256112	0.127945	0.217136	0.105556	0.0767618	0.174674	0.0331953		107.932	0.211499	0.150979	-0.177548	-0.0337013	0.0912372	0.227556	0.14695	0.343542	0.169474	0.125554	0.0509293
	108.396	0.328659	0.113406	-0.0111202	0.0373245	-0.0178104	-0.0376335	-0.140473	0.168585	0.0551172	0.0514049		108.396	0.241673	0.235896	0.130593	0.226668	0.0997504	0.0753589	0.168323	0.0306152		108.396	0.207838	0.148116	-0.171957	-0.0349714	0.0967594	0.216493	0.157223	0.336516	0.165945	0.124662	0.0496924
	108.859	0.312302	0.105362	-0.017935	0.0395178	-0.0213771	-0.0302435	-0.138302	0.173901	0.0529033	0.0497974		108.859	0.237774	0.237442	0.125782	0.24179	0.112363	0.0944807	0.174939	0.0289423		108.859	0.205147	0.145022	-0.168085	-0.0412033	0.0998929	0.216413	0.15107	0.331936	0.16079	0.122331	0.049167
	109.322	0.314975	0.114836	-0.016967	0.0406773	-0.0125044	-0.0260087	-0.137274	0.168884	0.0558271	0.0495703		109.322	0.226214	0.266734	0.118035	0.247831	0.0940514	0.0212372	0.16235	0.0403414		109.322	0.204093	0.146696	-0.165117	-0.0380074	0.103889	0.218473	0.137993	0.333243	0.175327	0.124065	0.0489767
	109.785	0.317447	0.121636	-0.0149603	0.0392266	-0.0256086	-0.0162725	-0.136921	0.166383	0.0563663	0.0498684		109.785	0.24019	0.261798	0.12245	0.243165	0.116051	0.0665284	0.17503	0.0338785		109.785	0.202832	0.14889	-0.169877	-0.0377439	0.100973	0.218457	0.150319	0.337736	0.169725	0.12459	0.04962
	110.249	0.311858	0.127151	-0.0219782	0.0391874	-0.0342629	-0.0162385	-0.141611	0.170049	0.0542693	0.0504069		110.249	0.217303	0.275022	0.130127	0.243191	0.0910774	0.0569531	0.168945	0.036155		110.249	0.203024	0.150085	-0.170407	-0.0355192	0.0931295	0.217314	0.166206	0.341886	0.170061	0.126198	0.0500057
	110.712	0.319125	0.114555	-0.0300687	0.0361637	-0.0289888	-0.0208275	-0.140774	0.166894	0.0520099	0.0507938		110.712	0.225353	0.27432	0.128677	0.234572	0.09187	0.058544	0.168889	0.0357506		110.712	0.203192	0.153065	-0.165884	-0.0274368	0.0934104	0.210281	0.167588	0.335375	0.166228	0.126202	0.0487028
	111.175	0.319375	0.113654	-0.0345854	0.0409755	-0.0349187	-0.00938915	-0.136988	0.161294	0.052427	0.0503368		111.175	0.2399	0.27732	0.117508	0.241758	0.102711	0.0303474	0.168258	0.0401334		111.175	0.206603	0.151099	-0.183465	-0.02862	0.0885427	0.215946	0.155697	0.339205	0.237096	0.131345	0.0520042
	111.638	0.319451	0.115231	-0.0372843	0.0422341	-0.0392391	-0.00944648	-0.13356	0.165129	0.0528144	0.0505189		111.638	0.234405	0.246861	0.118779	0.241676	0.116822	0.0427291	0.166879	0.0350162		111.638	0.20261	0.153712	-0.171853	-0.0266366	0.0837367	0.214313	0.156335	0.334512	0.223391	0.130013	0.0502735
	112.101	0.315411	0.110339	-0.0232222	0.0409161	-0.0471182	-0.00904492	-0.13889	0.172747	0.0526422	0.050557		112.101	0.206068	0.240089	0.12125	0.227902	0.111518	-0.00992861	0.149483	0.0388207		112.101	0.200588	0.162745	-0.175239	-0.0249517	0.0804656	0.208409	0.160803	0.337511	0.205266	0.1284	0.0502064
	112.565	0.309494	0.115811	-0.034594	0.0417016	-0.0526673	-0.00439016	-0.137142	0.168516	0.0508413	0.0502591		112.565	0.207262	0.247172	0.132878	0.229394	0.0963532	0.0106969	0.153959	0.0371965		112.565	0.204063	0.16867	-0.160818	-0.0287294	0.0824989	0.205203	0.158202	0.336195	0.207237	0.13028	0.0491511
	113.028	0.307806	0.113379	-0.0289047	0.040471	-0.0515415	-0.00285254	-0.138751	0.163542	0.0503935	0.0497169		113.028	0.226521	0.227182	0.111624	0.229415	0.100833	0.000501571	0.149346	0.038452		113.028	0.205933	0.171444	-0.191276	-0.0253149	0.0840365	0.203861	0.151589	0.315514	0.17985	0.121737	0.049881
	113.491	0.306762	0.117909	-0.0182132	0.0377552	-0.0596612	-0.00673681	-0.1367	0.156029	0.0496431	0.0494044		113.491	0.198615	0.244535	0.11195	0.236969	0.0943601	-0.0240498	0.14373	0.0422157		113.491	0.201066	0.177525	-0.219658	-0.0341145	0.0846781	0.19594	0.158048	0.309646	0.177275	0.116712	0.0522561
	113.954	0.298352	0.103083	-0.021856	0.037537	-0.0655713	-0.00297915	-0.135388	0.16339	0.0470709	0.0487589		113.954	0.197111	0.230965	0.106955	0.242074	0.0952768	0.00914885	0.146922	0.037364		113.954	0.204435	0.184183	-0.241803	-0.0354692	0.0850395	0.195826	0.152155	0.30421	0.159771	0.112039	0.0539124
	114.418	0.312897	0.111318	-0.0257303	0.0350572	-0.0784966	0.00340897	-0.119789	0.158582	0.0496558	0.0496654		114.418	0.193589	0.21148	0.108606	0.228246	0.0884765	0.0401737	0.145095	0.0312081		114.418	0.203925	0.187556	-0.232919	-0.032985	0.0804993	0.19239	0.152107	0.316384	0.148684	0.112849	0.0535315
	114.881	0.301945	0.107778	-0.0259557	0.0363571	-0.0745898	0.0030908	-0.11909	0.155176	0.0480889	0.048203		114.881	0.197129	0.238928	0.112779	0.217455	0.0896169	0.0157168	0.145271	0.0354067		114.881	0.19763	0.195492	-0.236226	-0.0323824	0.0745205	0.193182	0.144442	0.318202	0.146006	0.111207	0.053894
	115.344	0.292351	0.0975546	-0.0258193	0.0357366	-0.0728079	0.00285281	-0.117718	0.156211	0.0460452	0.0469683		115.344	0.185141	0.235783	0.106879	0.22227	0.106657	-0.0250238	0.138618	0.0397536		115.344	0.19235	0.198486	-0.245288	-0.0375791	0.0791174	0.190326	0.144643	0.311613	0.138384	0.108006	0.0543451
	115.807	0.289125	0.0937665	-0.0281818	0.0351517	-0.0804252	-0.00349073	-0.126474	0.149047	0.0410649	0.0473619		115.807	0.194428	0.252891	0.116202	0.223865	0.0865005	-0.0165357	0.142892	0.0410779		115.807	0.187506	0.199706	-0.242662	-0.0379121	0.0776237	0.190436	0.138199	0.302769	0.112008	0.103075	0.0534047
	116.271	0.289175	0.0864818	-0.0221732	0.0358906	-0.0849608	-0.0114861	-0.126085	0.141909	0.0385938	0.0471227		116.271	0.187431	0.247991	0.124798	0.220499	0.0896847	-0.0127788	0.142938	0.0393464		116.271	0.192633	0.201408	-0.256446	-0.0278763	0.0736663	0.186618	0.14822	0.304164	0.0950916	0.101942	0.0545772
	116.734	0.281929	0.0951169	-0.0349667	0.0338451	-0.0910135	-0.0177044	-0.13084	0.137152	0.0341898	0.0474482		116.734	0.208942	0.230285	0.115661	0.211494	0.108018	-0.00216391	0.145373	0.0363631		116.734	0.186329	0.203157	-0.2649	-0.0345017	0.0704634	0.185308	0.16367	0.310479	0.0836348	0.100405	0.0560392
	117.197	0.302733	0.0774422	-0.0291677	0.0351768	-0.0900267	-0.0241653	-0.132671	0.1303	0.0337027	0.0489012		117.197	0.230452	0.249219	0.109105	0.204929	0.11645	-0.0449713	0.144197	0.0447004		117.197	0.183124	0.200113	-0.27213	-0.0402704	0.0796431	0.186525	0.160511	0.315873	0.0802993	0.0992987	0.0569644
	117.66	0.293315	0.0680117	-0.0175713	0.034496	-0.0947987	-0.0286135	-0.127139	0.124529	0.0315286	0.0473744		117.66	0.267838	0.26853	0.111729	0.209003	0.10271	0.0341778	0.165665	0.0396064		117.66	0.194047	0.190321	-0.262982	-0.035362	0.0782095	0.181491	0.153918	0.306441	0.0869929	0.0992305	0.0552628
	118.123	0.29784	0.0655431	-0.0256987	0.0348616	-0.0988645	-0.0348444	-0.120066	0.117936	0.0295883	0.0476576		118.123	0.262086	0.279254	0.109352	0.206686	0.105205	0.0343396	0.166154	0.0399807		118.123	0.191662	0.193596	-0.262592	-0.0349899	0.0763236	0.182537	0.154795	0.314556	0.0967698	0.101406	0.0556851
	118.587	0.28379	0.0795362	-0.0260533	0.035134	-0.100836	-0.0394338	-0.123814	0.118815	0.0283922	0.0469606		118.587	0.258282	0.287583	0.0983736	0.19427	0.117226	0.0169088	0.162107	0.0421059		118.587	0.195449	0.191971	-0.266395	-0.0418607	0.0748747	0.183381	0.166142	0.319366	0.0874025	0.101148	0.0567849
	119.05	0.283143	0.0682502	-0.0179231	0.0375016	-0.112726	-0.0425785	-0.129962	0.11795	0.0254568	0.0475646		119.05	0.250483	0.296862	0.0969769	0.199089	0.0992484	0.0137089	0.159395	0.0437827		119.05	0.197099	0.187751	-0.279895	-0.0462825	0.0757066	0.176661	0.176484	0.313582	0.0493511	0.0944953	0.0581036
	119.513	0.2624	0.0778131	-0.0183559	0.0365319	-0.110221	-0.0479312	-0.128167	0.106464	0.0223168	0.0452776		119.513	0.253079	0.290059	0.0999058	0.195791	0.0967431	0.0350907	0.161778	0.0408477		119.513	0.193711	0.185388	-0.283024	-0.0367689	0.07358	0.175567	0.164887	0.32406	0.0581286	0.0950587	0.0581952
	119.976	0.268934	0.077466	-0.00465547	0.0351944	-0.111386	-0.0535601	-0.122296	0.0991699	0.0236084	0.0453547		119.976	0.249457	0.294311	0.104943	0.182842	0.100792	0.0489703	0.163552	0.0388813		119.976	0.191717	0.179757	-0.304716	-0.0362439	0.0759232	0.172426	0.159826	0.329731	0.0467905	0.090579	0.0602476
	120.44	0.275294	0.0676856	-0.0111315	0.034164	-0.115536	-0.0596974	-0.124999	0.0930799	0.0198574	0.0462342		120.44	0.257439	0.311678	0.105527	0.19294	0.114103	0.077231	0.176486	0.0382445		120.44	0.194401	0.174798	-0.280513	-0.0478953	0.0714077	0.174408	0.157267	0.341123	0.0445069	0.0921671	0.0590986
	120.903	0.241816	0.0682122	-0.00175093	0.030396	-0.112495	-0.0655002	-0.13014	0.0951156	0.0157067	0.0433034		120.903	0.239252	0.3056	0.102984	0.191198	0.108436	0.0429446	0.165069	0.0399629		120.903	0.200878	0.168629	-0.27393	-0.0416661	0.0782677	0.181468	0.158775	0.335713	0.0384039	0.0940598	0.0582595
	121.366	0.243982	0.071856	-0.00865646	0.0305105	-0.115366	-0.0713585	-0.119937	0.0970956	0.0160159	0.0434778		121.366	0.253636	0.282402	0.107057	0.177461	0.0913722	0.077112	0.16484	0.0357294		121.366	0.206553	0.170039	-0.27414	-0.0333966	0.0739665	0.180432	0.161029	0.326855	0.0418089	0.0947941	0.0576762
	121.829	0.241428	0.0714843	-0.00603585	0.0285372	-0.118892	-0.0758433	-0.116302	0.0960948	0.0150589	0.0433182		121.829	0.255643	0.265202	0.105476	0.164515	0.106182	0.0901163	0.164523	0.0320757		121.829	0.212786	0.169238	-0.277768	-0.0315679	0.0763117	0.180034	0.171627	0.325901	0.0406328	0.0963549	0.0582221
	122.293	0.243499	0.0756866	-0.0188766	0.0297851	-0.11852	-0.0810991	-0.117356	0.0933683	0.013311	0.0439075		122.293	0.249075	0.240639	0.116975	0.175334	0.104185	0.0474885	0.155616	0.0327527		122.293	0.217834	0.174254	-0.260556	-0.0433309	0.0720535	0.175835	0.174025	0.323336	0.0533039	0.0985281	0.0570081
	122.756	0.232462	0.0718397	-0.0237681	0.0266049	-0.122444	-0.0822727	-0.128668	0.0988393	0.00907414	0.0438951		122.756	0.232001	0.27074	0.119359	0.175299	0.10653	0.041191	0.15752	0.0347712		122.756	0.216416	0.174819	-0.257501	-0.0458827	0.0769434	0.184835	0.175512	0.320578	0.0751033	0.102314	0.0566295
	123.219	0.238765	0.0698571	-0.0352636	0.0262866	-0.123262	-0.0831079	-0.128511	0.109156	0.00924006	0.0450537		123.219	0.228427	0.250656	0.126132	0.167794	0.109495	0.0539985	0.156084	0.0304431		123.219	0.218901	0.170984	-0.262191	-0.0357729	0.0786431	0.184976	0.173617	0.316347	0.0687883	0.101588	0.056476
	123.682	0.240936	0.0510844	-0.0481911	0.0242668	-0.114974	-0.0818804	-0.127262	0.119536	0.00793942	0.0450147		123.682	0.254677	0.250267	0.134821	0.184286	0.118404	0.0448533	0.164552	0.0332668		123.682	0.228375	0.173077	-0.245501	-0.0315272	0.0732966	0.183658	0.165259	0.314039	0.0918397	0.105835	0.0547766
	124.145	0.244886	0.0672153	-0.0584189	0.027498	-0.116333	-0.0822076	-0.135182	0.130691	0.00976866	0.0469685		124.145	0.231664	0.230877	0.132611	0.19752	0.135596	0.0788829	0.167858	0.0252468		124.145	0.229204	0.17166	-0.258963	-0.0325778	0.0703852	0.183771	0.173462	0.308939	0.102364	0.10536	0.0558959
	124.609	0.241887	0.0698859	-0.0784522	0.0224295	-0.114995	-0.0815813	-0.142263	0.139267	0.00702226	0.0480272		124.609	0.191872	0.195605	0.133984	0.190616	0.146399	0.0421816	0.15011	0.0240672		124.609	0.22484	0.172538	-0.25	-0.0318851	0.0767066	0.183972	0.173633	0.311646	0.132379	0.110425	0.0551035
	125.072	0.25949	0.0458092	-0.0881806	0.0240025	-0.123294	-0.0826318	-0.130977	0.139651	0.00548357	0.0493225		125.072	0.206224	0.232392	0.140551	0.159162	0.151604	0.0230733	0.152168	0.0295565		125.072	0.214911	0.170608	-0.238767	-0.0292696	0.0806195	0.182271	0.170904	0.307961	0.142249	0.111276	0.0534535
	125.535	0.25488	0.0504903	-0.0876046	0.0241661	-0.130969	-0.0897618	-0.131035	0.148838	0.00487561	0.0500205		125.535	0.180713	0.195858	0.151504	0.157187	0.151383	-0.00585967	0.138464	0.0297746		125.535	0.215344	0.178437	-0.263219	-0.0300904	0.0827494	0.182042	0.166234	0.289984	0.160133	0.109068	0.0551127
	125.998	0.237262	0.0371986	-0.0945094	0.0237352	-0.126095	-0.095186	-0.177762	0.150599	-0.00559472	0.0510884		125.998	0.184202	0.195812	0.134094	0.179595	0.144991	-0.0148561	0.137306	0.0319547		125.998	0.204945	0.180875	-0.253608	-0.0353088	0.0847484	0.183338	0.169089	0.288132	0.13875	0.106773	0.0539206
	126.462	0.258044	0.0404718	-0.0888217	0.0247522	-0.121252	-0.0969422	-0.19092	0.148474	-0.00327423	0.0533244		126.462	0.193836	0.167373	0.124684	0.169529	0.154011	0.0275713	0.139501	0.0242137		126.462	0.197476	0.178766	-0.254096	-0.0339795	0.082797	0.180732	0.172611	0.281989	0.129897	0.104021	0.0533587
	126.925	0.261464	0.0400219	-0.10015	0.0246836	-0.117807	-0.0997109	-0.175036	0.154008	-0.00156592	0.053245		126.925	0.153799	0.207408	0.130374	0.1692	0.146389	0.00646562	0.135606	0.0279499		126.925	0.194643	0.174805	-0.268904	-0.03088	0.080434	0.178094	0.159077	0.273206	0.109812	0.0966985	0.0537151
	127.388	0.251252	0.0357698	-0.0956645	0.0246513	-0.112831	-0.093545	-0.168955	0.15288	-0.000805303	0.0513324		127.388	0.146827	0.196973	0.133088	0.190769	0.149702	-0.0173833	0.133329	0.0318928		127.388	0.192701	0.170844	-0.263263	-0.0309219	0.0840597	0.170779	0.160395	0.279049	0.120845	0.0982763	0.0532408
	127.851	0.260238	0.0387764	-0.087691	0.0252799	-0.111398	-0.0928492	-0.176894	0.150613	0.000759464	0.0521943		127.851	0.150487	0.176868	0.139616	0.183585	0.128816	-0.00985971	0.128252	0.028939		127.851	0.184563	0.17094	-0.287206	-0.0257257	0.088728	0.169427	0.144489	0.285769	0.107008	0.0931102	0.0551484
	128.315	0.272856	0.0270451	-0.0884446	0.0246792	-0.110907	-0.0942361	-0.181478	0.14964	-0.000105743	0.0534723		128.315	0.140008	0.184265	0.132705	0.176316	0.13734	-0.0240686	0.124428	0.030985		128.315	0.184671	0.168998	-0.306099	-0.00826484	0.0941677	0.177762	0.140372	0.280788	0.0968596	0.0921394	0.0563245
	128.778	0.271489	0.0282376	-0.0842966	0.0262327	-0.106948	-0.097204	-0.184123	0.153788	0.000896967	0.053574		128.778	0.130871	0.193737	0.124312	0.170333	0.144306	-0.0110356	0.125421	0.0292644		128.778	0.188726	0.166443	-0.275905	0.00147327	0.0975894	0.176003	0.136036	0.278732	0.0866581	0.095084	0.0530049
	129.241	0.269366	0.0440102	-0.0917921	0.024836	-0.105652	-0.0921923	-0.186565	0.154276	0.00203594	0.0537478		129.241	0.120281	0.184473	0.129145	0.166006	0.121121	-0.00927881	0.118625	0.0277248		129.241	0.185364	0.170241	-0.294674	0.00467657	0.0981542	0.185254	0.128565	0.287122	0.0734734	0.0931307	0.0553344
	129.704	0.263867	0.0470919	-0.0918809	0.0251457	-0.0963295	-0.0946879	-0.183403	0.149999	0.00247526	0.0526529		129.704	0.127185	0.143391	0.13829	0.158321	0.122023	-0.00239877	0.114469	0.0239471		129.704	0.186381	0.168418	-0.284104	-0.000804041	0.101487	0.179226	0.117028	0.289787	0.0819611	0.0932644	0.0543069
	130.167	0.260175	0.0426589	-0.0791047	0.0171052	-0.0935394	-0.0886117	-0.181646	0.144894	0.00274131	0.0511636		130.167	0.141776	0.116531	0.127778	0.169155	0.131839	0.0238155	0.118483	0.020282		130.167	0.189737	0.165792	-0.4638	-0.00689103	0.0994036	0.178145	0.104412	0.289136	0.0901918	0.0717918	0.0723141
	130.631	0.309326	0.0374167	-0.0771723	0.0207446	-0.0941958	-0.0909812	-0.200297	0.155349	0.00752377	0.0573863		130.631	0.150798	0.122227	0.118961	0.194744	0.127928	0.038204	0.125477	0.0209083		130.631	0.193516	0.157846	-0.444569	0.0021641	0.107642	0.188093	0.10362	0.290894	0.0951702	0.0771529	0.0704959
	131.094	0.308673	0.0466219	-0.0885901	0.0212177	-0.0922817	-0.082912	-0.198286	0.15724	0.00896033	0.0574053		131.094	0.134431	0.112922	0.107423	0.175407	0.138171	0.0596301	0.121331	0.0157592		131.094	0.182914	0.155068	-0.4536	0.000189973	0.110859	0.192217	0.0876949	0.290158	0.0784107	0.0715457	0.0711469
	131.557	0.287596	0.0475169	-0.0789616	0.0183815	-0.0829871	-0.0820407	-0.194487	0.158867	0.00923557	0.0546974		131.557	0.150417	0.114845	0.119336	0.175928	0.15476	0.0481127	0.127233	0.0183868		131.557	0.182463	0.147136	-0.436823	0.00250959	0.103419	0.178057	0.075443	0.291929	0.0662625	0.0678219	0.0689272
	132.02	0.31395	0.0528013	-0.0753254	0.0171202	-0.08141	-0.0793959	-0.192731	0.155659	0.0138336	0.0567097		132.02	0.157356	0.0840166	0.126436	0.165964	0.131409	0.105011	0.128365	0.0126219		132.02	0.174637	0.146047	-0.446644	0.00502161	0.104999	0.181118	0.069021	0.299882	0.0709829	0.0672294	0.0701413
	132.484	0.300795	0.0547609	-0.080415	0.0156008	-0.0726616	-0.0775541	-0.190965	0.146114	0.0119595	0.0547972		132.484	0.15956	0.10183	0.112933	0.169297	0.107663	0.111437	0.12712	0.0119675		132.484	0.179041	0.142067	-0.423139	0.00392244	0.0965775	0.181351	0.0549057	0.302472	0.0733121	0.0678345	0.0679033
	132.947	0.293791	0.0442692	-0.0724839	0.015046	-0.0737284	-0.081455	-0.187274	0.137782	0.00949338	0.0533115		132.947	0.139796	0.0744202	0.0912532	0.187952	0.109121	0.0993727	0.116986	0.0167357		132.947	0.177226	0.151714	-0.373081	-0.00061843	0.0873635	0.172688	0.051465	0.303702	0.0734989	0.0715509	0.0629462
	133.41	0.301718	0.0416647	-0.0659948	0.0170542	-0.0836392	-0.0834215	-0.202619	0.125683	0.00630569	0.0547564		133.41	0.124103	0.0768663	0.102056	0.171858	0.0842879	0.0990188	0.109698	0.0141037		133.41	0.173497	0.151661	-0.414807	-0.00665055	0.0770409	0.171869	0.0549797	0.300838	0.0734217	0.06465	0.0668733
	133.873	0.298555	0.0348962	-0.0748787	0.0157724	-0.0815988	-0.0857143	-0.206752	0.118627	0.00236329	0.054607		133.873	0.116779	0.111726	0.102756	0.180398	0.0895286	0.0796955	0.11348	0.0145167		133.873	0.176598	0.14852	-0.401186	-0.0175569	0.0730944	0.174008	0.0443537	0.309183	0.0680927	0.0639008	0.066204
	134.337	0.30599	0.0293078	-0.0634125	0.0183012	-0.097507	-0.0793184	-0.182809	0.11524	0.00572404	0.0536325		134.337	0.088473	0.0978579	0.099181	0.189321	0.0993075	0.0924253	0.111094	0.0157435		134.337	0.172296	0.148264	-0.405482	-0.0182338	0.069997	0.163864	0.0471069	0.314891	0.0554791	0.0609091	0.0665866
	134.8	0.301918	0.0240832	-0.0603213	0.0179061	-0.0982483	-0.0794253	-0.179307	0.10413	0.00384193	0.0525307		134.8	0.0559034	0.134812	0.0985853	0.190726	0.0971286	0.119204	0.11606	0.0184564		134.8	0.166813	0.141504	-0.39718	-0.0147729	0.0678754	0.163102	0.0475327	0.31258	0.0538399	0.0601438	0.0653344
	135.263	0.303776	0.10165	-0.0631246	0.0314343	-0.0914422	-0.0820901	-0.18143	0.108645	0.0159273	0.054343		135.263	0.0676145	0.131901	0.0955313	0.200022	0.0888174	0.126695	0.11843	0.019053		135.263	0.167507	0.134559		-0.0146316	0.060834	0.15294	0.0527402	0.310087	0.0444783	0.113564	0.0356594
	135.726	0.307504	0.1017	-0.00565202	0.0381633	-0.0982611	-0.065877	-0.190758	0.0990565	0.0232345	0.0538297		135.726	0.0517589	0.132553	0.0786458	0.223814	0.091364	0.105366	0.113917	0.0245724		135.726	0.154161	0.13281		-0.0234589	0.0613835	0.15095	0.0524537	0.312626	-0.0212241	0.102463	0.0390641
	136.189	0.321487	0.11365	0.000542291	0.036021	-0.0991969	-0.0730313	-0.18243	0.106257	0.0279124	0.0552721		136.189	0.0513009	0.132159	0.0743726	0.222363	0.098943	0.0671291	0.107711	0.0256645		136.189	0.1529	0.130538		-0.0227022	0.0681153	0.145854	0.0519145	0.317426	-0.056774	0.0984089	0.0414147
	136.653	0.308754	0.0981221	-0.00631151	0.0344276	-0.105719	-0.0851097	-0.178681	0.106454	0.021492	0.0541437		136.653	0.0737862	0.150367	0.0719853	0.225999	0.101027	0.0924655	0.119272	0.0242996		136.653	0.14462	0.12358		-0.0330463	0.0606623	0.138967	0.0464754	0.321312	-0.0653332	0.0921547	0.0426784
	137.116	0.304392	0.0908972	-0.0300595	0.03925	-0.107195	-0.0864828	-0.187742	0.104522	0.0159476	0.054522		137.116	0.0560454	0.169769	0.0528581	0.228239	0.106683	0.00760342	0.103533	0.0336522		137.116	0.141553	0.118482		-0.0318073	0.0623305	0.146151	0.0301797	0.322235	-0.0493935	0.0924662	0.0420709
	137.579	0.306147	0.10016	-0.0159724	0.0354829	-0.109999	-0.0871876	-0.175802	0.100164	0.0191241	0.0539488		137.579	0.0533001	0.151607	0.0435617	0.220812	0.0903733	0.0180456	0.0962832	0.031279		137.579	0.137068	0.113962		-0.0373103	0.0627926	0.142248	0.0271071	0.296342	-0.0434142	0.0873494	0.0393572
	138.042	0.281827	0.102458	-0.0311068	0.0363928	-0.115692	-0.0866854	-0.185969	0.105516	0.0133425	0.0530177		138.042	0.0442823	0.178143	0.0386088	0.227097	0.0844378	0.0352123	0.101297	0.033448		138.042	0.137624	0.117061		-0.0410862	0.0606848	0.139696	0.0319555	0.295119	-0.0289945	0.0890074	0.0385236
	138.506	0.290021	0.0826803	-0.0453514	0.0407789	-0.118101	-0.0872205	-0.191526	0.104676	0.00949468	0.0539744		138.506	0.0472067	0.167048	0.0390484	0.223384	0.0720121	-0.00756898	0.0901884	0.0355894		138.506	0.136725	0.119652		-0.0374811	0.0618075	0.146614	0.0203003	0.28694	-0.050189	0.085546	0.0392909
	138.969	0.283087	0.0727567	-0.0533198	0.0375817	-0.125402	-0.0906064	-0.181605	0.113788	0.00703508	0.0533108		138.969	0.0481124	0.160744	0.0445851	0.198512	0.0714775	0.0231485	0.0910965	0.0290984		138.969	0.138206	0.118976		-0.032917	0.0617159	0.151758	0.00601063	0.294553	-0.0590518	0.0849063	0.0409248
	139.432	0.267636	0.0653956	-0.0556134	0.0397811	-0.127142	-0.0915385	-0.183962	0.109381	0.00299219	0.0519031		139.432	0.0732969	0.147286	0.0423784	0.17534	0.083384	0.0377629	0.0932414	0.0229644		139.432	0.138725	0.119849		-0.0483832	0.0660142	0.152281	0.00627815	0.287467	-0.0507124	0.0839398	0.0406153
	139.895	0.265764	0.0559973	-0.0636043	0.0361576	-0.125364	-0.0936515	-0.195624	0.109806	-0.00131483	0.0524264		139.895	0.0967164	0.157799	0.0359548	0.169684	0.0649448	0.0051582	0.0883762	0.0269086		139.895	0.138172	0.115188		-0.0442216	0.0564138	0.144221	-0.0064188	0.294772	-0.0353668	0.0828449	0.0404382
	140.358	0.256437	0.0516473	0.0869018	0.0401856	-0.102479	-0.0865123	-0.197952	0.110489	0.0198397	0.0506784		140.358	0.105168	0.154348	0.0334949	0.163969	0.0582042	0.0310228	0.0910344	0.0241646		140.358	0.13277	0.122848		-0.0433451	0.0567833	0.148204	-0.00243914	0.299812	-0.0632117	0.0814276	0.042391
	140.822	0.23234	0.0500525	0.0833342	0.0417529	-0.0933777	-0.0834752	-0.194558	0.104613	0.0175854	0.0476567		140.822	0.109884	0.183572	0.0408642	0.160497	0.0781507	0.0471649	0.103356	0.0241111		140.822	0.128538	0.111575		-0.0500273	0.0563111	0.151834	-0.00774515	0.300342	-0.0719637	0.077358	0.0433565
	141.285	0.223352	0.0464011	0.0837898	0.0365011	-0.101326	-0.0904887	-0.186272	0.0990824	0.01388	0.0466409		141.285	0.114736	0.168578	0.0413642	0.1521	0.0722269	0.0371831	0.097698	0.0229189		141.285	0.135275	0.120341		-0.0519263	0.0496049	0.157801	1.01867e-05	0.302781	-0.0626335	0.0814067	0.0433883
	141.748	0.209375	0.0582392	0.0797582	0.0394137	-0.108411	-0.0864367	-0.181472	0.10086	0.0139159	0.0454982		141.748	0.134019	0.172999	0.0462408	0.129753	0.0708203	0.00610288	0.0933226	0.0256008		141.748	0.130658	0.127239		-0.0520387	0.0524881	0.162106	0.0117246	0.299088	-0.0589692	0.084037	0.0425889
	142.211	0.199881	0.048292	0.0616848	0.0399395	-0.0945107	-0.0949685	-0.161365	0.101968	0.0126152	0.0424262		142.211	0.125112	0.157891	0.0482737	0.122919	0.0765773	0.0144495	0.0908703	0.0220229		142.211	0.129103	0.130241		-0.0622446	0.0510986	0.142662	0.0177746	0.301555	-0.0490134	0.0826469	0.0421471
	142.675	0.190189	0.048158	0.0658579	0.0399328	-0.0828303	-0.102502	-0.169598	0.109464	0.0123339	0.0425355		142.675	0.115075	0.138032	0.0427727	0.122764	0.10697	0.0364503	0.0936775	0.0176203		142.675	0.124474	0.125909		-0.0662407	0.0558579	0.149754	0.00743168	0.307358	-0.0621214	0.0803028	0.0439309
	143.138	0.183529	0.0528099	0.0460208	0.0378043	-0.0800302	-0.0939456	-0.176364	0.0993899	0.00865169	0.0413248		143.138	0.123548	0.160099	0.0223326	0.127052	0.072173	-0.0140216	0.0818639	0.0275271		143.138	0.124474	0.124521		-0.0725587	0.0553233	0.159863	0.000902336	0.306154	-0.0517885	0.0808614	0.0441155
	143.601	0.164989	0.073167	0.0430899	0.0368681	-0.0808765	-0.0801943	-0.176995	0.105635	0.0107105	0.0401629		143.601	0.129065	0.204532	0.0234828	0.128554	0.0743372	0.0217873	0.0969596	0.028961		143.601	0.134489	0.12386		-0.0695485	0.0582553	0.156866	-0.00695267	0.298609	-0.0422794	0.0816623	0.0430779
	144.064	0.152825	0.050595	0.0310072	0.035834	-0.0810992	-0.0758675	-0.182426	0.109177	0.00500565	0.0390723		144.064	0.132958	0.204086	0.0130339	0.120557	0.0806125	-0.00150941	0.0916231	0.0317096		144.064	0.132445	0.123494		-0.0672641	0.0588495	0.157134	-0.0114277	0.284658	-0.051631	0.0782822	0.0423153
	144.528	0.158459	0.0454132	0.0370488	0.0421013	-0.0895687	-0.0726133	-0.186744	0.108145	0.00528008	0.0400798		144.528	0.15021	0.201516	0.00370445	0.107139	0.0919853	0.0348892	0.0982406	0.0296846		144.528	0.124714	0.127482		-0.0683174	0.0489631	0.158196	-0.00705176	0.276972	-0.0459158	0.0768802	0.0412922
	144.991	0.158666	0.0462567	0.0325928	0.040477	-0.0841948	-0.0814088	-0.188542	0.111851	0.00446218	0.0404508		144.991	0.134209	0.196345	0.0077639	0.104786	0.0667564	0.0107533	0.0867691	0.0300016		144.991	0.127341	0.128666		-0.0692967	0.0397964	0.150261	-0.0182543	0.271977	-0.0385353	0.0739944	0.04091
	145.454	0.176522	0.063537	0.0115365	0.0409542	-0.0930538	-0.0886925	-0.186716	0.116601	0.00508602	0.0426331		145.454		0.209326	0.00594695	0.0959295	0.0678774	-0.015806	0.0726547	0.0396981		145.454	0.134961	0.127943		-0.0642486	0.0431572	0.137405	-0.0250782	0.253474	-0.0441848	0.0704286	0.0393254
	145.917	0.191399	0.0714654	0.0172025	0.0476099	-0.104257		-0.18668	0.11022	0.0209943	0.0485714		145.917		0.183651	0.0124256	0.0937464	0.0759607	-0.00840406	0.0714759	0.0338874		145.917	0.136481	0.129686		-0.0764142	0.0455988	0.138414	-0.0134961	0.238488	-0.0320644	0.0708367	0.0379065
	146.38	0.162636	0.0589681	0.0171776	0.045924	-0.105568		-0.194483	0.106211	0.0129809	0.0466499		146.38		0.197748	0.0275508	0.0804519	0.082772	-0.00142016	0.0774204	0.0340729		146.38	0.136681	0.123015		-0.0790917	0.0510236	0.14309	-0.0151166	0.223704	-0.0337411	0.0686954	0.0370342
	146.844	0.18564	0.052606	0.02258	0.0462552	-0.107577		-0.196567	0.110366	0.0161861	0.0489015		146.844		0.190431	0.0133814	0.0827824	0.0646744	0.044644	0.0791826	0.0301017		146.844	0.135134	0.121427		-0.0715898	0.0495101	0.14209	-0.00809555	0.215632	-0.0269193	0.0696485	0.0351658
	147.307	0.183454	0.057597	0.0171874	0.0495839	-0.103815		-0.211023	0.116011	0.0155707	0.050426		147.307		0.161503	0.0140418	0.0899427	0.0668871	0.0217435	0.0708237	0.0266804		147.307	0.132259	0.122339		-0.0693363	0.0538595	0.150461	-0.00733398	0.205066	-0.0344178	0.0691122	0.0348171
	147.77	0.207728	0.0664971	0.0153221	0.0428681	-0.110944		-0.21811	0.115991	0.0170505	0.0536622		147.77		0.147109	0.00572523	0.0944468	0.0573007	0.0477672	0.0704698	0.0238004		147.77	0.136788	0.123033		-0.0818003	0.059467	0.149984	-0.0018673	0.207234	-0.0341556	0.0698354	0.0357749
	148.233	0.196424	0.0850416	0.0295842	0.0430664	-0.0996323		-0.224883	0.108653	0.0197505	0.0530314		148.233		0.162198	0.00225481	0.0879105	0.0646669	-0.00610863	0.0621843	0.0307622		148.233	0.134495	0.111962		-0.0761725	0.0674134	0.150667	0.000883467	0.201937	-0.019112	0.0715093	0.0337819
	148.697	0.184157	0.0896205	0.0144684	0.0387603	-0.109702		-0.224621	0.104756	0.0139198	0.0525004		148.697		0.17385	0.00391793	0.109497	0.0658622	-0.0150852	0.0676082	0.0345974		148.697	0.140892	0.120513		-0.0740141	0.0620467	0.154568	0.0157936	0.209677	-0.0403449	0.0736414	0.035368
	149.16	0.223444	0.0849806	0.025446	0.0348522	-0.0965108		-0.22189	0.113121	0.0233491	0.0548897		149.16		0.142115	0.00156324	0.120233	0.0601391	-0.0576536	0.0532794	0.0370151		149.16	0.143625	0.113423		-0.0727882	0.0711381	0.161034	0.00289083	0.211931	-0.0175539	0.0767124	0.0348303
	149.623	0.211352	0.0792379	0.0401714	0.0327606	-0.10959		-0.245725	0.106494	0.0163858	0.0567969		149.623		0.147338	-0.00715063	0.113435	0.0588727	-0.0301026	0.0564785	0.0339486		149.623	0.146157	0.112907		-0.0747932	0.0777297	0.154782	0.0245918	0.224551	-0.0312622	0.079333	0.0356969
	150.086	0.223872	0.0594649	0.026945	0.0311434	-0.102539		-0.249088	0.0969374	0.0123907	0.0569528		150.086		0.109607	0.00378898	0.115629	0.0583302	-0.06853	0.0437651	0.0345833		150.086	0.141966	0.116858		-0.0638388	0.0713124	0.146319	0.0322224	0.227007	-0.0437884	0.0785071	0.0352443
	150.55	0.247791	0.0421677	0.031566	0.0341462	-0.115013		-0.251841	0.085273	0.0105843	0.0594579		150.55		0.117415	0.00196658	0.121895	0.0669697	-0.0494718	0.0517551	0.0333078		150.55	0.153713	0.117182		-0.0680255	0.0671398	0.140818	0.0266428	0.233978	-0.0502071	0.077655	0.0368534
