# Supplementary material for: Regulation of Nodal signaling propagation by receptor interactions and positive feedback
Source: eLife. 2022 Sep 23;11:e66397. doi: 10.7554/eLife.66397 (PMC9612913; doi:10.7554/eLife.66397)
Supplement: Figure 6—figure supplement 1—source data 1. [file elife-66397-fig6-figsupp1-data1.xlsx]

## Sheet: Figure 6 - figure supplement 1
	Figure 6 - figure supplement 1A
		Squint-Dendra2						Cyclops-Dendra2
		Wild type		acvr1b-a-/- + 0.4 ng acvr1b-b MO-1		100 pg acvr2b-a mRNA		Wild type		acvr1b-a-/- + 0.4 ng acvr1b-b MO-1		100 pg acvr2b-a mRNA
	Time post-photoconversion (s)	Intensity	Fit	Intensity	Fit	Intensity	Fit	Intensity	Fit	Intensity	Fit	Intensity	Fit
	0	1824.04	1931.4	237.533	239.205	1070.4	1091.23	125.366	126.576	69.9652	69.76	1027.78	1010.14
	600	1758.56	1735.64	220.398	221.501	1055.27	1044.98	128.4	121.039	62.8653	64.3161	979.952	986.959
	1200	1654.89	1630.72	205.957	205.298	987.472	1002.16	114.117	115.915			952.497	965.437
	1800	1560.34	1534.66	190.232	190.469	948.652	962.524	108.489	111.172	56.6817	55.2422	939.381	945.457
	2400	1488.1	1446.71	178.682	176.897	927.672	925.824	105.339	106.784			919.449	926.91
	3000	1401.82	1366.18	165.912	164.475	895.28	891.845	101.861	102.722	48.4001	48.1437	901.693	909.692
	3600	1309.59	1292.44	153.939	153.107	912.087	860.387	99.239	98.9627	45.633	45.1968	895.32	893.709
	4200	1249.4	1224.93	145.255	142.703	871.28	831.263	94.0907	95.4838	43.4325	42.5904	879.974	878.871
	4800	1170.41	1163.12	133.691	133.181	828.777	804.298	90.6129	92.2641	40.9196	40.285	860.196	865.097
	5400	1102.25	1106.52	123.953	124.466	781.985	779.333	89.8302	89.2844	37.6315	38.246	848.536	852.311
	6000	1053.55	1054.7	115.759	116.49	738.366	756.221	86.3234	86.5268	35.4627	36.4425	847.765	840.441
	6600	998.612	1007.25	108.115	109.19	707.517	734.822	83.6477	83.9747	34.0133	34.8473	839.728	829.422
	7200	954.533	963.805	102.918	102.509	706.533	715.01	80.3568	81.6128	32.4529	33.4364	829.86	819.192
	7800	940.179	924.028	95.9876	96.3949	689.114	696.668	77.4231	79.4269	31.6798	32.1885	816.141	809.696
	8400	900.728	887.608	88.8907	90.7989	670.157	679.686	79.729	77.404	30.9775	31.0847	801.795	800.881
	9000	879.79	854.261	84.1851	85.6775	647.025	663.964	75.6742	75.5318	30.32	30.1085	803.154	792.698
	9600	785.092	823.728	79.4232	80.9902	637.103	649.408	73.6905	73.7991	29.348	29.245	799.777	785.102
	10200	803.826	795.773	75.7519	76.7004	627.176	635.932	71.9024	72.1956	28.8877	28.4812	791.288	778.049
	10800	765.342	770.176	72.2511	72.7742	613.359	623.455	74.5273	70.7115	28.5489	27.8057	780.121	771.503
	11400	741.944	746.74	68.098	69.181	606.862	611.904	72.1992	69.3381	27.7031	27.2082	773.144	765.426
	12000	708.867	725.281	66.286	65.8924	596.888	601.209	70.4708	68.0671	27.0986	26.6798	761.546	759.784
	12600	696.241	705.634	63.1782	62.8826	597.087	591.307	67.0233	66.8907	25.7234	26.2123	751.912	754.547
	13200	672.774	687.644	60.1129	60.128	583.716	582.14	67.1671	65.8021	25.2456	25.7989	743.298	749.685
	13800	656.436	671.173	58.5598	57.607	574.888	573.653	64.988	64.7945	24.9899	25.4333	737.865	745.172
	14400	636	656.092	56.811	55.2997	568.523	565.795	66.36	63.8621	24.8395	25.1098	737.265	740.982
	15000	621.241	642.283	53.2805	53.1881	562.92	558.521	62.0044	62.9991	25.5551	24.8238	728.838	737.093
	15600	598.945	629.64	51.5273	51.2555	556.748	551.785	62.358	62.2005	24.7123	24.5707	723.851	733.483
	16200	593.841	618.064	49.3866	49.4867	554.111	545.55	58.5789	61.4614	24.6854	24.347	721.009	730.131
	16800	579.107	607.465	49.7684	47.8679	546.468	539.776	58.1669	60.7774	24.3791	24.149	709.109	727.02
	17400	564.242	597.76			541.642	534.431	57.6332	60.1443	23.5376	23.9739	701.843	724.131
	Figure 6 - figure supplement 1B
		Wild type		50 pg oep mRNA		acvr1b-a-/- + 0.4 ng acvr1b-b MO-1		100 pg acvr2b-a mRNA
	Time post-photoconversion (s)	Intensity	Fit	Intensity	Fit	Intensity	Fit	Intensity	Fit
	0	0.00051541	0	0.00529076	0	0.0175496	0	0.00595581	0
	10	0.0150495	0.015841	0.0143773	0.00763814	0.0377551	0.030077	0.0226995	0.0174428
	20	0.034815	0.0296057	0.0225508	0.0154086	0.0606802	0.0533665	0.0416215	0.0322695
	30	0.0524799	0.0425101	0.0349959	0.0232363	0.081104	0.0739437	0.0563146	0.0458114
	40	0.0568995	0.0547757	0.0467784	0.0311016	0.101807	0.0927893	0.0721528	0.0584874
	50	0.0690544	0.0664948	0.0557552	0.0389762	0.11619	0.110307	0.0849851	0.0704592
	60	0.0810823	0.0777301	0.0666536	0.0468304	0.135898	0.126711	0.101004	0.0818686
	70	0.094259	0.0885519	0.077132	0.0546389	0.155538	0.142219	0.113396	0.0927872
	80	0.106734	0.0990144	0.0900946	0.062377	0.173049	0.156964	0.124464	0.10329
	90	0.115042	0.109155	0.0990474	0.0700464	0.194241	0.171023	0.134984	0.113434
	100	0.120773	0.11901	0.107311	0.0776335	0.21508	0.184478	0.145459	0.123234
	110	0.132929	0.128647	0.114941	0.0851433	0.233929	0.197479	0.160691	0.132734
	120	0.141863	0.13807	0.116748	0.0925615	0.251107	0.210037	0.175351	0.141932
	130	0.149109	0.147278	0.123024	0.0998938	0.263451	0.222147	0.190966	0.150902
	140	0.157517	0.15631	0.131766	0.10714	0.27295	0.233891	0.206105	0.159619
	150	0.168365	0.165147	0.136891	0.114301	0.282901	0.245229	0.215108	0.168185
	160	0.182339	0.173846	0.145556	0.121381	0.294045	0.256305	0.224121	0.17656
	170	0.192339	0.182396	0.151792	0.128378	0.308465	0.267084	0.232108	0.184746
	180	0.20247	0.190792	0.156604	0.135292	0.32669	0.277555	0.237102	0.192743
	190	0.210176	0.199035	0.165248	0.142124	0.334583	0.287721	0.243087	0.200612
	200	0.2123	0.207128	0.17125	0.14888	0.342039	0.297598	0.248111	0.208337
	210	0.21602	0.215119	0.175624	0.155562	0.347272	0.307299	0.254517	0.215905
	220	0.222867	0.222974	0.185645	0.162166	0.351723	0.316744	0.256203	0.223317
	230	0.228596	0.230696	0.190029	0.168693	0.358575	0.325933	0.259356	0.23061
	240	0.236753	0.238283	0.201152	0.175149	0.364966	0.334868	0.266521	0.237816
	250	0.241712	0.245754	0.208151	0.181541	0.380144	0.343603	0.274779	0.244901
	260	0.24992	0.253141	0.217306	0.187862	0.393299	0.352207	0.28484	0.251864
	270	0.259888	0.260415	0.220704	0.194114	0.402706	0.360612	0.289251	0.258715
	280	0.265125	0.267577	0.2246	0.200297	0.409289	0.368819	0.295002	0.265501
	290	0.267711	0.274627	0.232138	0.206421	0.415448	0.376828	0.301598	0.27219
	300	0.273892	0.281596	0.238755	0.212482	0.417972	0.384702	0.308405	0.278781
	310	0.281276	0.288498	0.245672	0.218481	0.419808	0.392448	0.31393	0.285276
	320	0.290351	0.295311	0.249	0.224421	0.42623	0.400036	0.322055	0.291692
	330	0.300079	0.302034	0.257668	0.230303	0.428418	0.407465	0.330296	0.298028
	340	0.309829	0.308669	0.261369	0.236127	0.430202	0.414736	0.338276	0.304284
	350	0.322314	0.315215	0.267729	0.241896	0.438654	0.421886	0.345485	0.310463
	360	0.327247	0.321673	0.266313	0.247611	0.444333	0.428907	0.350969	0.316568
	370	0.33445	0.328044	0.269349	0.253272	0.449031	0.435801	0.360702	0.322602
	380	0.338963	0.334326	0.276766	0.258882	0.456832	0.44257	0.369815	0.328568
	390	0.344198	0.340521	0.280707	0.264441	0.461923	0.449222	0.376494	0.334468
	400	0.353654	0.34668	0.285263	0.269951	0.464717	0.455758	0.380294	0.340312
	410	0.35758	0.352764	0.287518	0.275414	0.464394	0.462185	0.387447	0.346126
	420	0.351666	0.358772	0.291686	0.28083	0.471035	0.468508	0.390862	0.35188
	430	0.354337	0.364703	0.298121	0.286201	0.471544	0.47473	0.390274	0.357576
	440	0.359096	0.370557	0.302839	0.291529	0.478658	0.480881	0.398343	0.363212
	450	0.36304	0.376335	0.305813	0.296822	0.482865	0.486994	0.404595	0.36879
	460	0.362758	0.382038	0.310399	0.302086	0.496342	0.493017	0.41145	0.374308
	470	0.369384	0.387665	0.312272	0.30731	0.510244	0.49895	0.417388	0.379769
	480	0.377264	0.393217	0.317589	0.312493	0.51173	0.504794	0.42155	0.38517
	490	0.382592	0.398717	0.324063	0.317636	0.519029	0.510549	0.425903	0.390527
	500	0.387529	0.404188	0.329265	0.32274	0.522851	0.516215	0.426769	0.395842
	510	0.389011	0.409596	0.335958	0.327804	0.532615	0.521792	0.430523	0.401103
	520	0.397115	0.414941	0.338471	0.332827	0.53926	0.527281	0.431198	0.406313
	530	0.40539	0.420224	0.34498	0.337811	0.54874	0.532682	0.433988	0.41147
	540	0.407385	0.425445	0.347256	0.342756	0.554321	0.538045	0.440737	0.416574
	550	0.414772	0.430604	0.35423	0.347661	0.558636	0.543343	0.442756	0.421627
	560	0.427824	0.4357	0.354536	0.352527	0.563487	0.548565	0.451351	0.426628
	570	0.437356	0.440735	0.355058	0.357353	0.576519	0.553712	0.454998	0.431577
	580	0.440034	0.445709	0.359392	0.362141	0.583046	0.558784	0.462128	0.436511
	590	0.446952	0.45066	0.363047	0.366889	0.577969	0.563781	0.465635	0.441405
	600	0.450456	0.455567	0.368578	0.371609	0.585717	0.568703	0.469339	0.446257
	610	0.449403	0.460422	0.374363	0.376308	0.58474	0.573552	0.46853	0.451066
	620	0.448834	0.465224	0.380504	0.380972	0.586857	0.578325	0.468855	0.455832
	630	0.449823	0.469975	0.381201	0.385602	0.588722	0.583046	0.470849	0.460556
	640	0.454186	0.474675	0.386033	0.390195	0.594833	0.587768	0.468472	0.465237
	650	0.458155	0.479323	0.392142	0.394754	0.596928	0.592431	0.466565	0.469875
	660	0.461597	0.48392	0.394205	0.399277	0.59843	0.597039	0.464703	0.474472
	670	0.474861	0.488465	0.401112	0.403766	0.601549	0.601589	0.466389	0.479026
	680	0.476994	0.492965	0.400975	0.408219	0.606091	0.606085	0.467015	0.483539
	690	0.468327	0.497429	0.400679	0.412639	0.611621	0.610523	0.462874	0.488008
	700	0.470805	0.501851	0.404064	0.417023	0.613498	0.614906	0.461972	0.492437
	710	0.478648	0.506228	0.409836	0.421373	0.616289	0.619233	0.467421	0.496824
	720	0.481778	0.510562	0.417944	0.425689	0.619134	0.623504	0.470624	0.501169
	730	0.490468	0.514853	0.417109	0.429972	0.619658	0.627721	0.471939	0.505473
	740	0.498459	0.519104	0.419722	0.434249	0.616817	0.631882	0.47736	0.509736
	750	0.500163	0.523312	0.425767	0.438504	0.611373	0.635987	0.484792	0.513983
	760	0.505956	0.52748	0.430981	0.44273	0.612701	0.640038	0.485274	0.518208
	770	0.514139	0.531608	0.436643	0.446927	0.614975	0.644034	0.48582	0.522397
	780	0.520353	0.535698	0.439622	0.451095	0.620307	0.647975	0.489457	0.526549
	790	0.520622	0.53975	0.439997	0.455234	0.619063	0.651863	0.492445	0.530665
	800	0.522914	0.543763	0.445075	0.459344	0.627903	0.655695	0.499322	0.534745
	810	0.528962	0.54774	0.45556	0.463426	0.632489	0.659473	0.505775	0.538789
	820	0.538795	0.55168	0.456569	0.46748	0.645538	0.663214	0.509071	0.542797
	830	0.542562	0.555585	0.462375	0.471505	0.64293	0.666972	0.511335	0.546768
	840	0.54546	0.559455	0.468097	0.475501	0.641311	0.670684	0.517164	0.550704
	850	0.54583	0.56329	0.46961	0.47947	0.652054	0.674352	0.526282	0.554605
	860	0.542991	0.567091	0.470218	0.48341	0.653947	0.677974	0.527895	0.55847
	870	0.552565	0.570868	0.47615	0.48733	0.662247	0.68155	0.53373	0.562299
	880	0.560584	0.574647	0.478568	0.491241	0.671825	0.685082	0.537768	0.566092
	890	0.564677	0.578398	0.479431	0.495129	0.669722	0.688569	0.546805	0.56985
	900	0.571808	0.582118	0.487411	0.498991	0.67413	0.692012	0.556275	0.573573
	910	0.577155	0.585807	0.49127	0.50283	0.676409	0.69541	0.55825	0.577261
	920	0.583629	0.589466	0.491907	0.506643	0.677959	0.698764	0.562292	0.58094
	930	0.587023	0.593092	0.497911	0.510433	0.680266	0.702074	0.563053	0.584637
	940	0.589032	0.596688	0.503264	0.514199	0.684637	0.705339	0.564732	0.588306
	950	0.59483	0.600253	0.507465	0.517941	0.69237	0.70856	0.574517	0.591949
	960	0.592546	0.603788	0.512569	0.521658	0.694743	0.711738	0.576581	0.595566
	970	0.596355	0.607292	0.512844	0.525352	0.702734	0.714872	0.580503	0.599157
	980	0.597524	0.610765	0.51227	0.529022	0.71515	0.717961	0.592976	0.60272
	990	0.596652	0.614208	0.520862	0.532668	0.722752	0.721008	0.593738	0.606257
	1000	0.604594	0.617621	0.524951	0.536291	0.72218	0.724012	0.596348	0.609768
	1010	0.604172	0.621003	0.529254	0.539913	0.725147	0.727003	0.604116	0.613252
	1020	0.612898	0.624355	0.531434	0.543521	0.734249	0.73005	0.611105	0.616711
	1030	0.625529	0.627677	0.534144	0.547109	0.740361	0.733081	0.622398	0.620144
	1040	0.622005	0.630969	0.535212	0.550679	0.749371	0.736081	0.624554	0.623549
	1050	0.630411	0.634232	0.543873	0.554228	0.753234	0.739054	0.624993	0.626931
	1060	0.628103	0.637469	0.545624	0.557759	0.760662	0.741995	0.629653	0.630284
	1070	0.623549	0.640707	0.554512	0.56127	0.762484	0.744909	0.641294	0.633613
	1080	0.624422	0.643925	0.556195	0.564762	0.768861	0.747794	0.64681	0.636916
	1090	0.63166	0.647118	0.556737	0.568234	0.77439	0.750649	0.648735	0.640193
	1100	0.640295	0.650286	0.556874	0.571687	0.776106	0.753477	0.650976	0.643445
	1110	0.644858	0.653428	0.560048	0.575122	0.786841	0.756275	0.653963	0.646671
	1120	0.650205	0.656544	0.564338	0.578537	0.791848	0.759045	0.65699	0.649871
	1130	0.655809	0.659636	0.570281	0.581933	0.792145	0.761786	0.658237	0.653046
	1140	0.661544	0.662702	0.574114	0.58531	0.802385	0.764498	0.655203	0.656196
	1150	0.658354	0.665744	0.581601	0.588668	0.808115	0.767183	0.651158	0.659321
	1160	0.65374	0.668759	0.585944	0.592008	0.811006	0.769838	0.650856	0.662419
	1170	0.65427	0.671751	0.590291	0.595328	0.811455	0.772468	0.65662	0.665494
	1180	0.664478	0.674716	0.591612	0.59863	0.806885	0.775066	0.658569	0.668542
	1190	0.668066	0.677657	0.597184	0.601912	0.797356	0.777638	0.663428	0.671567
	1200	0.677425	0.680574	0.602312	0.605177	0.800028	0.780182	0.66241	0.674566
	1210	0.680471	0.683464	0.608423	0.608423	0.803649	0.782697	0.669183	0.677539
	1220	0.681887	0.686332	0.607895	0.611649	0.805992	0.785186	0.673515	0.680489
	1230	0.678274	0.689174	0.611226	0.614858	0.808387	0.787645	0.675586	0.683413
	1240	0.672569	0.691991	0.616873	0.618048	0.800721	0.790077	0.685778	0.686313
	1250	0.672217	0.694785	0.618399	0.621219	0.792941	0.792483	0.689369	0.689189
	1260	0.676773	0.697604	0.621588	0.624372	0.794528	0.794859	0.689645	0.692045
	1270	0.68404	0.700412	0.619648	0.627508	0.793224	0.797209	0.695918	0.69492
	1280	0.688864	0.703203	0.626167	0.630641	0.793271	0.799532	0.703702	0.697795
	1290	0.693264	0.705975	0.62303	0.633768	0.788292	0.801827	0.702882	0.700649
	1300	0.70685	0.708728	0.62513	0.636878	0.78019	0.804094	0.706223	0.703482
	1310	0.707986	0.711463	0.630048	0.63997	0.779413	0.806335	0.705962	0.706295
	1320	0.721607	0.71418	0.633503	0.643047	0.785139	0.80855	0.705217	0.709089
	1330	0.727713	0.716878	0.634746	0.646108	0.7886	0.810735	0.710104	0.711861
	1340	0.726272	0.719558	0.635529	0.649153	0.789102	0.812895	0.716453	0.714612
	1350	0.728788	0.72222	0.637282	0.652181	0.791097	0.815028	0.71932	0.717344
	1360	0.727189	0.724864	0.637233	0.655193	0.793428	0.817135	0.725146	0.720057
	1370	0.72875	0.72749	0.64632	0.658189	0.799148	0.819214	0.725818	0.722748
	1380	0.725278	0.730097	0.651	0.661169	0.807048	0.821266	0.724887	0.725419
	1390	0.741246	0.732687	0.655859	0.664133	0.816621	0.823316	0.725361	0.72807
	1400	0.747169	0.735258	0.654999	0.66708	0.823874	0.825406	0.734346	0.730702
	1410	0.753528	0.737813	0.656082	0.670012	0.825832	0.827496	0.738901	0.733314
	1420	0.755125	0.740349	0.65923	0.672928	0.825598	0.829565	0.742262	0.735905
	1430	0.762565	0.742867	0.663293	0.675828	0.826553	0.831612	0.738163	0.738476
	1440	0.764141	0.745367	0.664391	0.678713	0.826519	0.833638	0.740845	0.741028
	1450	0.766796	0.747849	0.671476	0.681581	0.823757	0.835644	0.738942	0.74356
	1460	0.76489	0.750314	0.670935	0.684434	0.828632	0.83763	0.746042	0.746073
	1470	0.767332	0.752762	0.673088	0.687271	0.826952	0.839595	0.751077	0.748566
	1480	0.759215	0.755192	0.682072	0.690092	0.833727	0.84154	0.755671	0.75104
	1490	0.756956	0.757605	0.687806	0.692898	0.838852	0.843463	0.760491	0.753494
	1500	0.753976	0.759999	0.69075	0.695688	0.841671	0.845366	0.76032	0.755928
	1510	0.761626	0.762376	0.689428	0.698463	0.840844	0.847248	0.759036	0.758343
	1520	0.761539	0.764736	0.686001	0.701222	0.833908	0.84911	0.759926	0.760738
	1530	0.771975	0.767078	0.688857	0.703966	0.826123	0.850952	0.762239	0.763114
	1540	0.776005	0.769404	0.693407	0.706695	0.828136	0.852774	0.764417	0.765471
	1550	0.782177	0.771712	0.701068	0.709426	0.830779	0.854575	0.764747	0.767809
	1560	0.778929	0.774003	0.705088	0.712154	0.834579	0.856357	0.770128	0.770128
	1570	0.782703	0.776276	0.704353	0.71487	0.840848	0.858119	0.774858	0.772428
	1580	0.776545	0.778533	0.699938	0.717573	0.834643	0.85986	0.781913	0.774709
	1590	0.781915	0.780773	0.706876	0.720262	0.836886	0.861582	0.783959	0.776971
	1600	0.785991	0.782995	0.717204	0.722938	0.83878	0.863283	0.793871	0.779214
	1610	0.798393	0.785201	0.718111	0.725602	0.844094	0.864965	0.792989	0.781459
	1620	0.796537	0.787389	0.721125	0.728252	0.842096	0.866627	0.792511	0.783738
	1630	0.806441	0.789561	0.716262	0.730889	0.844578	0.868269	0.793192	0.786007
	1640	0.803723	0.791751	0.718218	0.733513	0.859577	0.869891	0.796007	0.788262
	1650	0.802888	0.793945	0.72175	0.736124	0.861802	0.871494	0.797672	0.790502
	1660	0.801642	0.796127	0.725821	0.738722	0.85506	0.873077	0.797294	0.792728
	1670	0.807184	0.798296	0.73184	0.741308	0.854804	0.874641	0.8002	0.794939
	1680	0.811327	0.80045	0.732467	0.74388	0.853044	0.876184	0.797286	0.797135
	1690	0.806589	0.802591	0.731563	0.74644	0.859008	0.877709	0.797339	0.799318
	1700	0.809483	0.804718	0.74023	0.748986	0.859883	0.879214	0.793199	0.801486
	1710	0.808083	0.806831	0.736426	0.75152	0.862346	0.8807	0.790143	0.80364
	1720	0.812188	0.80893	0.739653	0.754042	0.876653	0.882166	0.790443	0.805779
	1730	0.815692	0.811015	0.742663	0.75655	0.879066	0.883613	0.793299	0.807904
	1740	0.815903	0.813087	0.744579	0.759046	0.876683	0.885041	0.797688	0.810015
	1750	0.812634	0.815145	0.748415	0.761529	0.87525	0.88645	0.799622	0.812112
	1760	0.816389	0.81719	0.760262	0.764	0.877176	0.88784	0.799418	0.814195
	1770	0.822557	0.819221	0.753267	0.766458	0.886747	0.889233	0.795484	0.816264
	1780	0.83014	0.821238	0.754794	0.768904	0.884637	0.890668	0.800793	0.818319
	1790	0.826103	0.823242	0.760273	0.771337	0.895164	0.892121	0.799684	0.82036
	1800	0.823704	0.825233	0.761931	0.773757	0.884248	0.893561	0.799838	0.822387
	1810	0.82232	0.82721	0.76284	0.776164	0.891668	0.894989	0.801392	0.8244
	1820	0.820124	0.829174	0.76603	0.778573	0.891643	0.896402	0.802667	0.826399
	1830	0.82154	0.831124	0.76465	0.780976	0.88945	0.897803	0.801247	0.828385
	1840	0.835529	0.833061	0.767937	0.78337	0.893082	0.899192	0.810411	0.830357
	1850	0.839129	0.834984	0.771371	0.785754	0.895769	0.900566	0.809228	0.832315
	1860	0.84062	0.836894	0.775526	0.788126	0.900614	0.901927	0.817624	0.834258
	1870	0.84859	0.838791	0.778595	0.790488	0.903243	0.903275	0.814656	0.836188
	1880	0.847771	0.840674	0.776328	0.792839	0.90248	0.90461	0.815506	0.838105
	1890	0.841807	0.842545	0.778718	0.795179	0.900444	0.905933	0.813878	0.840008
	1900	0.840154	0.844403	0.782273	0.797508	0.901627	0.907243	0.816721	0.841898
	1910	0.843332	0.846248	0.789709	0.799826	0.897729	0.90854	0.819054	0.843774
	1920	0.844992	0.84808	0.792747	0.802133	0.895972	0.909825	0.823462	0.845637
	1930	0.843247	0.849897	0.788479	0.80443	0.892334	0.911097	0.825333	0.847486
	1940	0.834638	0.851702	0.786349	0.806717	0.888845	0.912355	0.832642	0.849321
	1950	0.841285	0.853494	0.793266	0.808993	0.881679	0.9136	0.830049	0.851145
	1960	0.84539	0.855273	0.793516	0.811258	0.883351	0.914833	0.83263	0.852986
	1970	0.847291	0.85704	0.796356	0.813512	0.880688	0.916054	0.830667	0.854836
	1980	0.850846	0.858795	0.795892	0.815756	0.878065	0.917263	0.832914	0.856676
	1990	0.849986	0.860536	0.804698	0.817989	0.883957	0.918459	0.836676	0.858507
	2000	0.855801	0.862263	0.806154	0.820212	0.884074	0.919642	0.838045	0.860325
	2010	0.863158	0.863978	0.799441	0.822425	0.878324	0.920811	0.843378	0.862133
	2020	0.866926	0.865706	0.806615	0.824627	0.872975	0.921969	0.843519	0.863931
	2030	0.872454	0.867451	0.807347	0.826818	0.874053	0.923115	0.844458	0.865719
	2040	0.873345	0.869194	0.812642	0.828999	0.871552	0.924249	0.855155	0.867497
	2050	0.869378	0.870926	0.819466	0.83117	0.878511	0.925371	0.856864	0.869265
	2060	0.870936	0.872648	0.820121	0.83333	0.882741	0.926478	0.854374	0.871021
	2070	0.879094	0.874361	0.824815	0.835481	0.882337	0.927574	0.859043	0.872768
	2080	0.882762	0.876065	0.832139	0.83762	0.884386	0.928658	0.863592	0.874505
	2090	0.889352	0.87776	0.836127	0.839754	0.88703	0.929731	0.868691	0.876232
	2100	0.892051	0.879444	0.840009	0.841881	0.888508	0.930791	0.872694	0.877949
	2110	0.89426	0.881118	0.836698	0.843999	0.890584	0.931838	0.873694	0.879655
	2120	0.89737	0.882784	0.834919	0.846109	0.884438	0.932873	0.872347	0.881351
	2130	0.894244	0.88444	0.84334	0.848208	0.886329	0.933896	0.865423	0.883037
	2140	0.89458	0.886088	0.848379	0.850298	0.880352	0.934909	0.862374	0.884714
	2150	0.90042	0.887724	0.842785	0.852379	0.87531	0.935908	0.864143	0.88638
	2160	0.901293	0.889351	0.846939	0.854452	0.871096	0.936949	0.863005	0.888036
	2170	0.901335	0.89097	0.845408	0.856515	0.869712	0.937995	0.860059	0.889682
	2180	0.892618	0.89258	0.854545	0.858569	0.875058	0.939034	0.866093	0.891319
	2190	0.890942	0.894179	0.850399	0.860614	0.881227	0.940063	0.872521	0.892946
	2200	0.898548	0.895769	0.853964	0.86265	0.888572	0.941083	0.87047	0.894562
	2210	0.911244	0.897351	0.858612	0.864678	0.896537	0.942095	0.874325	0.896169
	2220	0.908042	0.898924	0.867025	0.866696	0.899568	0.9431	0.87701	0.897766
	2230	0.915688	0.900486	0.866861	0.868706	0.899707	0.944095	0.879634	0.899354
	2240	0.921078	0.902039	0.866472	0.870708	0.911047	0.945081	0.889265	0.90093
	2250	0.918352	0.903584	0.866964	0.8727	0.916389	0.94606	0.898994	0.902498
	2260	0.913561	0.90512	0.87293	0.874684	0.921982	0.947031	0.9053	0.904057
	2270	0.919011	0.906645	0.872324	0.876659	0.92503	0.947992	0.911643	0.905605
	2280	0.918742	0.908162	0.876138	0.878626	0.938118	0.948945	0.913136	0.907143
	2290	0.910414	0.909671	0.878211	0.880585	0.940384	0.94989	0.908566	0.908672
	2300	0.91117	0.91117	0.882223	0.882534	0.944513	0.950828	0.909061	0.910194
	2310	0.92219	0.912659	0.884075	0.884476	0.951756	0.951756	0.902541	0.911722
	2320	0.928547	0.91414	0.884734	0.88641	0.948878	0.952676	0.900239	0.913242
	2330	0.941245	0.915613	0.889563	0.888335	0.957414	0.953588	0.906609	0.914755
	2340	0.941951	0.917075	0.897602	0.890252	0.954086	0.954492	0.91958	0.916259
	2350	0.942854	0.918529	0.904105	0.892161	0.962699	0.955387	0.919565	0.917755
	2360	0.945251	0.919974	0.899408	0.894062	0.969881	0.956275	0.924026	0.919244
	2370	0.95386	0.921411	0.906408	0.895954	0.971517	0.957155	0.926858	0.920726
	2380	0.953164	0.922837	0.901289	0.897839	0.972133	0.958025	0.936731	0.922199
	2390	0.96011	0.924257	0.905471	0.899716	0.969923	0.958888	0.941737	0.923664
	2400	0.966406	0.925669	0.907165	0.901584	0.97354	0.959744	0.941541	0.925124
	2410	0.968433	0.927108	0.911485	0.903445	0.981851	0.96059	0.939741	0.926574
	2420	0.969305	0.928541	0.911846	0.905299	0.982718	0.961429	0.941737	0.928017
	2430	0.971056	0.929969	0.918629	0.907144	0.976792	0.962261	0.939065	0.929454
	2440	0.965243	0.931389	0.918343	0.908982	0.979308	0.963083	0.940664	0.930883
	2450	0.960751	0.932802	0.920532	0.910813	0.973049	0.963897	0.934015	0.932304
	2460	0.962454	0.934209	0.914807	0.912634	0.971892	0.964705	0.937578	0.933719
	2470	0.968285	0.935609	0.916629	0.914449	0.979173	0.965504	0.940507	0.935126
	2480	0.970301	0.937001	0.917835	0.916257	0.989338	0.966295	0.937398	0.936526
	2490	0.975535	0.938389	0.931993	0.918056	0.995057	0.967079	0.941974	0.93792
	2500	0.974198	0.939768	0.928205	0.919849	0.994592	0.967854	0.940127	0.939307
	2510	0.974483	0.941141	0.927298	0.921635	0.993324	0.968621	0.933671	0.940686
	2520	0.979992	0.942508	0.932824	0.923412	0.99096	0.969381	0.93682	0.94206
	2530	0.983737	0.943867	0.930528	0.925182	0.992859	0.970133	0.933696	0.943426
	2540	0.986558	0.94522	0.93124	0.926946	1.00443	0.970893	0.93376	0.944785
	2550	0.982041	0.946567	0.930254	0.928701	1.00564	0.971654	0.932343	0.946138
	2560	0.976328	0.947906	0.924861	0.93045	1.0043	0.972408	0.933892	0.947484
	2570	0.968358	0.949239	0.929605	0.932193	0.996133	0.973157	0.937708	0.948824
	2580	0.970584	0.950567	0.933894	0.933927	0.989241	0.973901	0.942104	0.950159
	2590	0.977905	0.951886	0.941611	0.935655	0.9777	0.974637	0.942504	0.951485
	2600	0.982926	0.9532	0.942081	0.937376	0.979236	0.975368	0.941243	0.952806
	2610	0.982285	0.954507	0.954601	0.939089	0.973804	0.976095	0.941936	0.954121
	2620	0.977197	0.955807	0.954808	0.940799	0.973089	0.976814	0.94606	0.955428
	2630	0.966039	0.957102	0.950738	0.942507	0.97138	0.977529	0.949826	0.956731
	2640	0.956237	0.958389	0.949918	0.944214	0.972529	0.978239	0.94968	0.958028
	2650	0.942375	0.95967	0.958322	0.94592	0.972461	0.978942	0.954017	0.959317
	2660	0.933743	0.960946	0.964883	0.947617	0.982932	0.979641	0.95188	0.960602
	2670	0.928446	0.962213	0.953326	0.949308	0.986537	0.980333	0.94352	0.96188
	2680	0.930152	0.963475	0.960885	0.950993	0.989015	0.981021	0.944431	0.963152
	2690	0.932813	0.964731	0.9679	0.95267	0.992429	0.981704	0.950801	0.96442
	2700	0.928643	0.965979	0.969043	0.954342	0.997026	0.982381	0.955892	0.96568
	2710	0.923665	0.967223	0.970367	0.956006	0.999962	0.983054	0.959704	0.966935
	2720	0.922383	0.968459	0.985283	0.957664	1.00596	0.983721	0.963322	0.968185
	2730	0.926008	0.969689	0.984129	0.959316	1.00641	0.984383	0.958633	0.969429
	2740	0.924315	0.970914	0.988749	0.96096	1.0042	0.985042	0.963433	0.970669
	2750	0.924987	0.97213	0.98859	0.962599	1.00502	0.985694	0.965612	0.971901
	2760	0.921103	0.973342	0.989807	0.964231	0.997933	0.986342	0.971087	0.973129
	2770	0.925901	0.974546	0.994856	0.965856	1.00624	0.986985	0.982588	0.974351
	2780	0.936263	0.975749	0.9913	0.967476	1.01299	0.987623	0.992154	0.975568
	2790	0.938671	0.976949	0.998622	0.969087	1.02387	0.988258	1.00062	0.976781
	2800	0.936186	0.978147	1.00164	0.970694	1.01754	0.988887	1.00331	0.977986
	2810	0.933633	0.979343	1.00467	0.972293	1.02822	0.989512	1.0071	0.979188
	2820	0.939419	0.980532	1.00018	0.973886	1.02805	0.990132	1.00719	0.980385
	2830	0.940114	0.981716	0.999303	0.975474	1.03262	0.990748	1.0117	0.981576
	2840	0.945744	0.982896	1.00753	0.977053	1.03831	0.991361	1.0078	0.982764
	2850	0.945771	0.98407	1.00859	0.978628	1.04376	0.991967	1.0138	0.983944
	2860	0.946383	0.98524	1.01114	0.980194	1.05025	0.992571	1.01745	0.985122
	2870	0.943153	0.986403	1.01364	0.981756	1.0499	0.99317	1.02232	0.986293
	2880	0.948245	0.987563	1.01864	0.983311	1.05921	0.993765	1.0259	0.987461
	2890	0.950775	0.988717	1.01514	0.984859	1.05847	0.994356	1.02983	0.988624
	2900	0.949469	0.989867	1.01853	0.986402	1.05574	0.994943	1.03423	0.989781
	2910	0.950212	0.991012	1.01553	0.987937	1.0605	0.995527	1.03463	0.990935
	2920	0.952264	0.992151	1.01586	0.989467	1.0624	0.996101	1.02575	0.992083
	2930	0.954631	0.993288	1.0155	0.99099	1.07013	0.996672	1.02782	0.993228
	2940	0.960763	0.994417	1.01625	0.992507	1.07179	0.997236	1.03862	0.994368
	2950	0.965108	0.995543	1.02275	0.994018	1.07659	0.997797	1.05239	0.995503
	2960	0.973112	0.996664	1.02928	0.995522	1.08271	0.998354	1.05098	0.996635
	2970	0.974337	0.997781	1.03403	0.997022	1.08097	0.998907	1.03483	0.997761
	2980	0.975659	0.998893	1.03372	0.998513	1.07691	0.999456	1.02849	0.998885
	2990	0.972212	1	1.0283	1	1.07183	1	1.03031	1
