# Supplementary material for: Regulation of Nodal signaling propagation by receptor interactions and positive feedback
Source: eLife. 2022 Sep 23;11:e66397. doi: 10.7554/eLife.66397 (PMC9612913; doi:10.7554/eLife.66397)
Supplement: Figure 6—figure supplement 2—source data 1. [file elife-66397-fig6-figsupp2-data1.xlsx]

## Sheet: Figure 6 - figure supplement 2
	Figure 6 - figure supplement 2A
	Distance (µm)	Background-subtracted intensity in wild-type embryos normalized to the number of transplanted cells																		Mean normalized intensity	SEM		Distance (µm)	Background-subtracted intensity in MZsqt-/-;cyc-/- embryos normalized to the number of transplanted cells																			Mean normalized intensity	SEM
		1	2	3	4	5	7	8	9	10	11	12	13	14	15	16	17	18	19					1	2	3	4	5	6	7	8	9	10	11	12	13	14	15	16	17	18	19
	0	6.21136	15.9527	17.4185	9.13311	-1.21754	44.0701	28.9029	10.6166	83.7007	12.8959	27.3258	13.1826	13.2528	13.3001	28.2015	5.83776	1.26942	12.346	19.0222	4.60427		0	24.5023	53.5122	63.1535	29.3728	1.80879	43.2556	26.795	51.0618	83.6412	23.7753	56.6493	25.8732	35.529	15.1107	11.86	63.3372	8.04702	64.8029	23.5557	37.1391	5.18919
	0.457	6.26933	15.9477	16.5329	8.81571	-1.70546	43.5297	27.5799	10.5369	82.9989	12.8275	27.0285	12.9349	12.6783	13.1044	27.1137	5.70259	1.12126	12.3375	18.6308	4.56293		0.457	24.1699	50.5972	64.3774	29.1464	1.4075	40.7022	25.847	49.9663	83.5527	23.3764	56.6654	25.0875	33.937	14.3886	11.6515	61.9568	7.79763	64.3443	23.1753	36.4288	5.1828
	0.914	6.30834	15.9017	15.9436	8.57156	-2.126	42.6872	26.6618	10.4943	82.3266	12.8197	26.0283	12.7288	12.3647	12.4603	25.5821	5.67138	0.922346	12.1445	18.194	4.51369		0.914	24.2151	48.5359	66.9813	29.0785	0.954559	37.9426	25.0081	49.0062	82.8862	22.8461	56.4364	24.2255	32.1364	13.8106	11.5398	60.2225	7.4485	63.1566	22.4967	35.733	5.18075
	1.371	6.38481	15.9336	15.9176	8.21358	-2.2925	41.3633	25.4907	10.5057	81.7934	12.8688	25.0149	12.3412	11.9901	11.7845	23.8759	5.72872	0.787664	12.1598	17.7701	4.4559		1.371	24.6625	46.8294	70.7161	28.9535	0.689431	35.4398	23.3795	47.3896	81.7335	22.2376	56.3752	23.3146	30.4378	13.2449	11.6039	58.0632	7.12361	61.2126	21.7614	35.0089	5.18041
	1.827	6.357	15.7646	16.0262	7.73709	-2.20658	40.4752	23.643	10.3825	81.5487	12.8775	24.0258	12.2241	11.2141	11.1685	22.4001	5.92911	0.813659	12.0555	17.3576	4.41644		1.827	25.0222	45.6192	74.6998	28.6436	0.470868	33.6296	21.9605	46.4727	80.4937	21.3826	56.1658	22.67	29.0703	12.7797	11.4449	56.1142	6.65422	59.1447	21.1628	34.4001	5.20918
	2.284	6.2825	15.46	15.7984	7.38067	-2.07511	39.7961	21.6871	10.2706	80.8024	12.8463	22.9889	12.302	10.2654	10.8867	21.108	5.99458	0.805121	12.0403	16.9244	4.35943		2.284	25.1003	44.4214	78.9435	28.0295	0.744245	32.6246	21.2002	45.7047	79.1313	20.29	55.6433	22.17	27.5995	12.4692	11.1751	54.4573	6.27916	57.312	20.6446	33.8916	5.24803
	2.741	6.10148	15.4082	15.3451	7.07717	-2.02309	39.0427	19.8958	9.90875	79.6053	12.8818	22.1427	11.9451	8.99976	10.7109	19.7093	5.94373	0.544692	12.1303	16.4094	4.29268		2.741	24.783	42.9055	82.0646	27.3469	0.725681	32.1807	20.6664	45.174	77.6044	19.3871	54.429	21.9575	26.1813	12.2244	11.1243	52.788	6.00488	54.9025	20.1917	33.2969	5.24896
	3.198	5.88741	15.2925	14.9409	6.85577	-2.1116	38.2521	18.2488	9.61811	77.6507	12.973	20.9087	11.3606	7.7284	10.7864	18.6579	5.84717	0.222579	12.3631	15.8601	4.19291		3.198	24.2702	41.2749	83.859	26.9137	0.439544	31.8146	20.4085	44.3225	75.3598	18.6832	53.1047	21.5817	24.9334	12.1047	11.1128	51.1395	5.9954	52.3672	19.7082	32.5997	5.19737
	3.655	5.71356	15.1888	14.6009	6.79298	-2.25223	37.2889	16.7354	9.47274	74.7628	12.9513	19.5299	10.3516	6.44389	10.324	17.9117	5.83086	0.0601121	12.3917	15.2277	4.04888		3.655	23.2012	39.7419	84.7532	26.5765	0.206162	31.9316	20.3491	43.1586	73.4327	18.436	51.7047	21.0511	23.9214	12.2957	10.9593	49.1624	5.95116	50.0209	19.1465	31.8947	5.12666
	4.112	5.61063	15.1278	14.4162	6.6099	-2.44477	36.029	15.2371	9.34059	71.8838	12.9772	17.9487	9.28307	5.64688	9.96264	17.7188	5.72872	0.0715421	12.4989	14.647	3.89899		4.112	21.8903	38.421	84.9824	25.9728	0.197583	32.1081	20.4244	41.8405	71.0808	18.2823	50.3834	20.8218	23.1381	12.4598	10.5747	46.9203	5.96397	47.6903	18.438	31.1363	5.02722
	4.568	5.51997	15.0881	14.319	6.43972	-2.91475	34.5507	14.3843	9.28851	69.5424	12.9755	16.3822	8.70479	5.31019	9.83199	17.7466	5.66968	0.0573084	12.592	14.1938	3.77162		4.568	20.9387	37.34	84.2804	24.968	0.122319	32.2416	20.2242	40.2672	68.4915	17.7822	48.7687	20.8363	22.49	12.464	10.1051	44.6403	5.99708	45.4389	17.7836	30.2727	4.89953
	5.025	5.43591	15.0537	14.2899	6.32334	-3.17248	33.2196	14.4199	8.89016	68.8449	13.0348	14.8284	8.4244	5.14869	9.47028	17.8636	5.71729	-0.0159486	12.4641	13.9023	3.72491		5.025	19.9296	36.9234	82.4129	23.6858	0.167485	32.929	20.0257	38.9846	65.5644	16.9962	46.9165	20.9213	21.7447	12.4396	9.86567	42.3655	5.89363	43.5987	17.2158	29.399	4.73726
	5.482	5.44368	14.9372	14.1014	5.98311	-3.30933	31.7295	14.2996	8.51961	68.2818	13.0606	13.2767	8.14298	5.1528	9.12857	17.6498	5.69699	0.030757	12.4611	13.5882	3.67974		5.482	18.7655	36.9528	79.6384	22.4065	0.418309	33.6019	19.7075	38.3944	63.5216	16.2281	44.6777	20.9499	20.9055	12.4148	9.78561	40.3356	5.8226	42.3088	16.5615	28.5998	4.57496
	5.939	5.53616	14.877	13.8294	5.53367	-3.5378	30.3169	14.0156	8.2998	67.7228	12.9469	12.3338	7.95304	5.15128	8.82758	17.515	5.67269	0.17286	12.6981	13.3258	3.63735		5.939	17.8365	36.9268	76.2132	21.2745	0.491304	33.8584	19.573	38.0569	61.7554	15.3819	42.1185	21.0403	20.3752	12.2628	9.72479	39.0387	5.62271	41.5494	16.0263	27.8488	4.41
	6.396	5.61253	14.8602	13.3755	5.23223	-3.73955	28.8663	14.4788	8.068	67.2905	12.7837	11.835	7.65189	5.04053	8.52047	16.7332	5.67835	0.241486	12.835	13.0758	3.60106		6.396	17.4955	36.3066	73.0893	20.2078	0.471407	33.4983	18.6944	38.0902	59.9539	14.6324	40.3	21.2881	20.0295	12.0427	9.6291	38.1894	5.33648	41.1136	15.623	27.1574	4.26821
	6.853	5.7526	14.9283	12.9	5.22491	-3.86081	27.74	14.977	7.95105	66.2965	12.6856	11.5173	7.4254	5.05113	8.03266	15.9823	5.60988	0.0943084	12.7223	12.835	3.54203		6.853	17.3546	35.1562	70.1369	19.1086	0.44498	33.2669	17.5161	37.7647	58.2116	13.9808	38.9013	21.642	19.9873	11.6207	9.52846	37.9396	4.97857	41.2368	15.1501	26.5224	4.14688
	7.309	5.86397	15.1477	12.5897	5.33202	-4.09721	26.4714	15.1703	7.91321	65.066	12.6329	11.419	7.14601	4.9144	7.64032	15.8489	5.53861	0.0423551	12.8887	12.6405	3.47264		7.309	16.8924	33.6598	66.3198	17.8764	0.549525	32.6268	16.5546	37.0817	57.0426	13.445	37.4983	21.9654	19.9943	11.45	9.41943	38.0544	4.69786	41.9583	14.8062	25.8891	4.01322
	7.766	5.77514	15.413	12.2825	5.5235	-4.0683	25.0518	14.9783	7.89826	63.6622	12.5873	11.3405	6.75834	4.87489	7.47894	15.9256	5.48972	-0.117986	12.8885	12.4301	3.3903		7.766	16.7892	32.0818	61.2604	16.6878	0.534775	32.0969	16.0534	36.4155	56.4066	13.1369	36.4581	21.7139	20.0048	11.4247	9.46496	38.4314	4.56198	43.1658	14.2711	25.3137	3.86991
	8.223	5.72734	15.472	12.2355	5.81071	-4.12982	23.901	14.7699	7.72783	62.0675	12.4028	11.5586	6.69613	4.945	7.17939	15.9856	5.50519	-0.0733178	13.0367	12.2677	3.29852		8.223	17.2003	30.7852	55.9635	15.7067	0.747765	31.5334	15.7265	35.7026	56.0917	12.8693	35.821	21.3231	20.3833	11.3937	9.60043	39.3594	4.42618	44.6685	13.5374	24.8863	3.74881
	8.68	5.73219	15.2206	12.3522	6.12382	-4.25813	22.8415	14.9299	7.42898	60.2381	12.2815	11.9313	6.79861	5.14023	6.69726	15.9581	5.55027	0.0278692	13.2683	12.1257	3.19661		8.68	17.5507	29.7255	51.1062	15.0005	0.849814	30.7449	15.915	35.3853	56.0749	12.5259	36.2809	20.76	20.6822	11.2643	9.59129	40.2524	4.20343	46.1432	12.8256	24.5727	3.68104
	9.137	5.72867	15.0395	12.3997	6.31053	-4.46192	21.7645	15.5014	7.20111	58.5449	12.2069	12.3813	6.89367	5.23228	6.14698	15.7258	5.51038	0.0805467	13.1706	11.9654	3.1075		9.137	17.6214	28.3604	47.0507	14.3369	0.806721	29.694	15.9852	35.4655	56.172	12.0954	37.0956	20.0371	21.1081	11.1876	9.54709	40.8709	3.98814	46.9725	12.2408	24.244	3.6458
	9.594	5.92732	14.9447	12.0817	6.29894	-4.50722	20.7946	16.0711	7.08928	57.3901	12.2881	12.7766	7.08007	4.87445	5.69322	15.3669	5.45703	0.167439	13.2523	11.8359	3.04622		9.594	17.6167	26.78	43.151	13.7838	0.793686	28.7372	15.9388	35.1604	56.4888	11.706	38.5304	19.3977	21.4583	10.9943	9.40745	41.0152	3.64856	47.1134	11.7603	23.8675	3.62135
	10.05	6.029	14.5976	11.8977	6.28291	-4.68708	19.6352	15.4549	7.0352	56.5313	12.4555	12.9515	7.46749	4.75154	5.1485	15.1418	5.46433	0.223514	13.1292	11.6395	2.99391		10.05	17.5961	25.0784	39.8116	13.1334	0.58698	28.1226	15.9029	34.4877	57.2219	11.3158	40.3322	19.4202	21.8457	10.7367	9.16034	40.7297	3.40449	46.7246	11.266	23.5199	3.62024
	10.507	6.03344	14.3467	11.9441	6.38889	-4.9614	18.5968	14.1841	7.08076	54.8376	12.5002	12.9194	7.73583	5.03483	4.88029	15.4617	5.37731	0.301299	13.0983	11.4311	2.90053		10.507	17.299	22.85	36.8246	12.4732	0.501554	27.5153	15.8007	33.5983	57.7285	11.0003	42.2802	19.4615	21.9091	10.7034	8.82079	40.0581	3.53173	46.1982	10.8941	23.1289	3.61419
	10.964	5.97513	14.2099	12.031	6.55721	-5.01136	17.7897	13.2568	7.1134	52.5214	12.4995	13.0426	7.89949	5.38956	4.81036	15.6529	5.37783	0.498579	12.8756	11.2494	2.77406		10.964	16.712	20.6231	34.6416	11.7916	0.498235	26.5599	15.7269	33.0919	58.5026	10.7314	44.2322	19.6556	21.6102	10.4889	8.45802	38.8851	3.69741	46.5661	10.699	22.7985	3.649
	11.421	5.91653	14.242	12.1338	6.64305	-5.02061	17.2432	12.8342	7.33643	50.5936	12.6511	13.1177	7.98807	5.64522	4.58112	15.5245	5.44476	0.670607	12.7511	11.1276	2.67136		11.421	16.1571	18.8429	33.5061	11.1324	0.467887	25.4048	15.241	32.7531	59.734	10.532	45.772	19.8916	21.4599	10.2525	8.1079	37.3955	3.96293	47.476	10.4424	22.5543	3.71754
	11.878	5.96886	14.4294	12.0603	6.54903	-4.91642	16.9847	12.1257	7.37983	48.8265	12.6153	13.1189	7.93837	5.73786	4.5901	15.2131	5.53995	0.834818	12.4935	10.9717	2.57612		11.878	15.5944	17.3997	33.1024	10.5447	0.385686	24.4486	14.1432	32.0968	60.3234	10.2297	46.5577	20.1188	21.4342	10.1042	7.82555	35.808	4.22857	49.1082	10.2129	22.2982	3.7808
	12.335	6.06925	14.5496	12.0406	6.28928	-5.00897	17.0372	11.1317	7.29117	47.6871	12.5071	13.2194	7.66771	5.6957	4.48282	14.8035	5.60701	0.986005	12.3234	10.7989	2.52206		12.335	15.0258	16.4434	33.1689	10.0391	0.213338	23.5671	13.0182	31.0917	60.4899	9.68822	47.0056	20.1525	21.6976	9.99709	7.64736	34.273	4.17213	50.6829	9.93506	22.0163	3.83749
	12.791	6.07406	14.85	12.1006	6.15916	-4.99681	17.0589	10.2782	7.03534	45.9443	12.3267	13.187	7.66089	5.60161	4.28293	14.4885	5.74854	0.921435	12.1951	10.6065	2.44254		12.791	14.5692	15.3036	33.5627	9.61795	0.0846618	22.5632	12.2511	29.2155	60.3468	9.1384	47.1775	19.9132	21.8819	9.58781	7.4332	32.6863	4.09654	51.8607	9.61352	21.6265	3.87387
	13.248	6.03807	14.9005	12.2117	6.19346	-5.17353	16.888	9.78071	6.66904	44.4631	12.2924	13.1504	7.87513	5.4662	3.95029	14.2231	5.74696	0.573836	11.9673	10.4009	2.38338		13.248	14.3213	14.577	33.949	9.44208	0.0320539	21.86	11.9831	27.4915	59.8578	8.75993	47.1688	19.6481	22.051	9.14988	7.40503	31.1649	4.2065	52.4991	9.41296	21.3147	3.87435
	13.705	5.9733	14.8883	12.2012	6.15083	-5.3624	16.5175	9.34933	6.40261	43.2514	12.4801	12.7701	7.80937	5.16403	3.89829	13.9118	5.67862	0.182182	11.7744	10.1689	2.33579		13.705	14.0503	14.4928	34.6165	9.43178	0.0470735	21.6732	11.6925	26.2679	59.2276	8.43016	46.6554	19.6431	22.0243	8.75247	7.47368	29.7023	4.15935	52.6311	9.28953	21.0664	3.85181
	14.162	6.03592	14.8348	12.2308	6.14155	-5.18509	16.2808	8.75621	6.28199	41.7557	12.6402	12.3471	7.54455	4.66976	3.80247	13.935	5.60986	0.0263598	11.5749	9.96016	2.26857		14.162	13.6925	14.3607	35.3673	9.5326	-0.302235	21.6414	11.0756	25.2817	58.3235	8.20395	45.5362	19.7106	21.5602	8.30258	7.54775	27.9397	3.73232	52.7343	9.00864	20.6973	3.82545
	14.619	6.10256	14.8429	12.182	6.03678	-5.22524	16.0718	8.11694	6.25152	40.1709	12.6976	12.1886	7.11358	4.16085	3.97318	14.1382	5.64341	-0.102738	11.4527	9.76753	2.20353		14.619	13.1747	14.1732	36.168	9.59332	-0.471868	21.7151	10.2134	24.5059	57.5797	8.04781	44.0319	19.9609	20.8765	7.83837	7.50968	25.7194	3.53076	52.2554	8.68852	20.269	3.78385
	15.076	6.14286	14.8298	12.0643	5.72187	-5.18852	15.885	7.78342	6.24733	38.9129	12.7921	12.0239	6.75431	3.6539	4.2324	14.3762	5.65699	-0.116542	11.3854	9.61986	2.15167		15.076	12.4512	14.0009	36.7795	9.6472	-0.586103	21.8331	9.52764	24.1488	56.9553	7.84228	42.7632	20.3146	19.9025	7.68875	7.20558	23.3223	3.53607	51.2291	8.37917	19.839	3.73645
	15.532	6.10457	14.6036	11.867	5.48944	-5.06969	15.7007	7.58772	6.35143	38.2569	12.9239	11.4503	6.44207	3.40146	4.53995	14.5334	5.63688	-0.157051	11.3312	9.49966	2.11905		15.532	11.8788	14.1775	36.9908	9.61303	-0.71148	22.218	8.98376	23.8991	55.7141	7.80002	41.5693	20.6808	19.0328	7.76884	6.98963	21.0407	3.63113	50.2096	8.0354	19.4485	3.66576
	15.989	6.06978	14.4211	11.9229	5.41812	-4.94111	15.8069	7.46278	6.48881	38.3652	13.0362	10.6241	6.30616	3.11119	4.78995	14.7104	5.58736	-0.0912477	11.353	9.46898	2.12216		15.989	11.3509	14.3869	37.3792	9.49518	-0.736593	22.3298	8.93816	23.74	53.9851	7.9055	40.1491	20.4918	18.7209	7.70923	6.96972	19.0896	3.97302	49.024	7.76503	19.0877	3.56823
	16.446	5.93845	14.53	11.9058	5.52241	-4.95395	15.7551	7.8316	6.45716	39.238	13.0911	9.89846	6.26077	2.75723	4.86829	14.8888	5.45434	-0.108855	11.3129	9.48042	2.16592		16.446	10.6842	14.4519	38.101	9.29397	-0.733922	22.2377	9.00908	23.7822	51.6185	7.97735	38.7695	19.997	18.5123	7.22356	7.19068	17.4814	4.14989	47.7484	7.58721	18.6885	3.46447
	16.903	5.8258	14.4544	11.9386	5.45668	-5.13369	15.4645	8.00532	6.48613	39.9636	13.026	9.59319	6.23234	2.24255	4.883	14.9949	5.48546	-0.151738	11.2213	9.4438	2.20582		16.903	10.3201	14.3179	38.8677	9.21326	-0.719794	22.0132	9.25315	23.9627	49.3159	7.72432	36.8092	19.1997	18.1897	6.91647	7.4085	16.1093	3.85671	46.2429	7.49175	18.2364	3.35562
	17.36	5.84836	14.6997	11.8221	5.54453	-5.61866	14.8132	7.88999	6.51151	40.8128	13.0395	9.62695	6.27471	1.78417	4.86998	14.8761	5.50614	-0.132855	11.2049	9.40962	2.25394		17.36	9.75895	13.9815	39.1471	9.08686	-0.757961	22.1265	9.8039	24.1303	46.4208	7.25335	33.8934	18.113	17.8425	6.85178	7.46081	15.1364	3.7827	44.7556	7.37013	17.6925	3.21408
	17.817	5.79472	14.815	11.6186	5.58607	-5.93692	14.226	7.95722	6.51135	42.0012	12.9492	9.65818	6.30725	1.60808	4.85171	14.7728	5.48189	-0.252822	11.3034	9.40294	2.31379		17.817	9.16118	13.6152	38.907	8.98067	-0.834412	22.2396	9.93117	24.1732	43.5279	6.85346	30.9001	17.14	17.6372	6.80675	7.50553	14.5986	4.05769	43.3796	7.23057	17.148	3.06967
	18.273	5.83952	14.8106	11.3373	5.29751	-6.12655	13.6789	7.7951	6.48169	43.4076	12.8284	9.70647	5.99352	1.53069	4.94739	14.6398	5.44849	-0.344262	11.6091	9.3823	2.38297		18.273	8.61733	13.1661	38.0169	8.58955	-1.10602	21.5395	9.61111	23.8377	40.8615	6.41927	28.1736	16.2285	17.4593	6.66702	7.56234	14.3673	4.16323	41.8951	7.16455	16.486	2.92859
	18.73	5.95889	15.0173	11.0437	5.11379	-6.13855	13.4977	7.62578	6.53678	44.2659	12.6594	9.74492	5.93601	1.54223	4.95369	14.8994	5.39056	-0.194411	11.8991	9.43068	2.42437		18.73	8.0321	13.0453	36.5206	8.05869	-1.06293	20.2396	9.08613	23.7074	38.6983	6.03361	25.7061	15.2544	17.1297	6.57546	7.73879	14.4641	3.79015	39.6907	7.05097	15.7768	2.77424
	19.187	5.97773	15.354	10.9736	5.12771	-6.12284	13.2688	7.37736	6.83468	44.9194	12.544	9.85386	5.84085	2.13509	5.03199	15.6846	5.28968	-0.0812196	12.0248	9.55746	2.45446		19.187	7.78332	13.222	34.3751	7.56984	-1.08746	19.4135	8.5646	23.7155	36.5927	5.57024	23.3299	14.0451	16.7226	6.39811	7.70403	14.6295	3.34204	37.0777	6.91532	15.0465	2.60788
	19.644	5.87906	15.5557	10.7242	5.25499	-5.75857	12.7319	7.17982	6.92652	44.5911	12.6658	9.94642	5.82152	2.54422	5.12136	16.2058	5.27152	-0.144752	11.9541	9.5817	2.43144		19.644	7.47197	13.3429	31.7502	7.1731	-1.16939	18.7822	7.969	23.1871	34.7324	5.29027	21.4772	12.9698	16.0914	6.37356	7.54013	14.4504	2.977	34.7885	6.72088	14.3115	2.44855
	20.101	5.7929	15.4692	10.4258	5.37478	-5.59314	12.5423	7.14074	6.96814	43.5895	12.7993	10.2138	5.85473	2.61144	5.08601	16.0439	5.22715	-0.225911	12.1796	9.52779	2.37967		20.101	7.29899	13.1087	28.9973	6.92523	-1.24651	18.5243	7.52655	21.9779	32.8313	4.90012	20.7292	12.1013	15.5415	6.22461	7.27327	14.2977	2.50423	33.1531	6.61947	13.6468	2.30986
	20.558	5.72361	15.0391	10.1555	5.50744	-5.77942	12.6626	6.72099	6.67161	42.5089	12.7068	10.5742	5.70222	2.45682	4.78295	15.894	5.20296	-0.232939	12.2724	9.36499	2.3356		20.558	6.86293	12.6647	26.0836	6.76049	-1.33552	18.064	6.87617	20.7593	31.2441	4.48313	20.9143	11.5649	15.0767	6.11302	7.23251	14.2364	2.32644	31.7572	6.56166	13.0656	2.19015
	21.015	5.57895	14.4249	9.95718	5.36667	-5.77583	12.5039	6.97225	6.46135	41.6853	12.6767	10.8205	5.43992	2.27098	4.46897	15.5399	5.06492	-0.254776	12.2988	9.19447	2.29674		21.015	6.38508	12.3949	23.5689	6.65863	-1.38956	17.4412	5.38275	20.2014	29.983	3.94912	21.5351	11.0163	14.5784	6.19909	7.36328	14.3319	2.4702	30.8298	6.37294	12.5933	2.11626
	21.471	5.34345	14.1077	9.92116	5.19848	-5.77907	12.0744	7.43361	6.33665	40.9229	12.6393	10.719	5.16355	2.32175	4.2442	15.1181	4.94635	-0.186659	12.4965	9.05674	2.25775		21.471	6.15808	12.2825	21.6516	6.51466	-1.52037	16.6807	4.34165	19.9899	29.9784	3.48872	21.9356	10.8311	14.1034	6.31522	7.64318	14.5716	2.58393	30.2316	6.23366	12.3166	2.09087
	21.928	5.33338	13.9806	10.01	5.07145	-5.52232	11.4902	7.82642	6.42852	39.9894	12.6001	10.3045	5.07207	2.5392	4.08059	14.6571	4.88184	-0.22986	12.458	8.94285	2.20088		21.928	6.2829	12.1675	19.8523	6.29557	-1.29818	15.2707	3.78395	19.6248	30.419	3.18556	21.7201	11.1201	13.6411	6.42449	7.75432	14.612	2.7874	29.4096	5.95642	12.0531	2.04865
	22.385	5.49474	13.7717	9.98918	5.10268	-5.24469	11.0394	7.87932	6.50343	39.4801	12.4453	9.59215	4.81443	2.66207	3.75235	14.2927	4.94066	-0.490098	12.3815	8.80039	2.16745		22.385	6.40117	12.2802	18.5016	5.98112	-1.1738	13.7392	3.47279	18.5254	30.8888	3.06416	20.6509	11.3987	13.1512	6.1997	7.71249	14.3884	3.06493	28.6385	5.87748	11.7244	1.9981
	22.842	5.60074	13.7122	9.78956	5.0955	-4.91009	10.3945	7.95981	6.6594	39.8162	12.3012	9.07382	4.73022	2.87851	3.64742	13.8136	4.95113	-0.580178	12.4569	8.74391	2.16828		22.842	6.25176	12.2442	17.1758	5.62159	-0.917966	12.8974	3.24762	17.0248	31.6323	3.00114	19.4399	11.8435	12.595	5.92491	7.65892	14.1836	3.34313	28.1487	5.79449	11.4269	1.96516
	23.299	5.56514	13.3879	9.69959	4.80499	-4.49223	10.1694	8.01808	6.80702	39.8428	12.2561	8.93401	4.40046	2.97349	3.50745	13.5346	4.91009	-0.54607	12.542	8.68415	2.1595		23.299	6.04798	12.1534	16.4195	5.2561	-0.825451	12.2086	3.08444	16.1009	32.4867	2.91495	18.297	12.0621	12.0979	5.84248	7.78296	13.9066	3.61726	28.1045	5.59514	11.2186	1.96578
	23.756	5.443	13.3984	9.69648	4.56488	-4.31228	10.0313	8.29194	6.94023	39.1858	12.2312	8.9332	4.20171	2.9845	3.31716	13.3667	4.80054	-0.434449	12.6429	8.62684	2.12731		23.756	6.01984	12.1907	16.3481	4.94271	-0.734946	11.5673	3.00029	15.9014	33.0654	2.8041	17.556	11.7913	11.6864	5.85931	8.10285	13.6147	4.12335	27.929	5.37234	11.1126	1.96658
	24.212	5.44795	13.3792	9.72388	4.49622	-4.28557	10.0751	8.52156	6.98552	37.7032	12.2731	8.81729	4.01564	2.88191	3.3993	13.43	4.70949	-0.262318	12.7749	8.56036	2.0591		24.212	5.97755	12.214	16.2206	4.5713	-0.751098	11.2416	2.81498	16.1241	33.664	2.66936	16.9331	11.9123	11.2386	5.82123	8.09507	13.3146	4.06116	27.3422	5.35307	10.9904	1.97465
	24.669	5.48825	13.3114	9.6436	4.29455	-4.48305	9.92916	8.46536	6.99505	36.1678	12.2574	8.85466	3.99434	2.76566	3.41418	14.0404	4.7638	-0.128864	12.8711	8.48027	1.99763		24.669	5.98075	11.909	15.9799	4.32621	-0.821039	10.9458	2.85405	15.6416	33.7247	2.54572	15.8739	12.0554	10.9513	5.92604	8.1354	12.9515	3.44546	26.4898	5.35587	10.7511	1.95056
	25.126	5.47077	13.2609	9.45655	4.01769	-4.92536	9.75538	8.57124	6.79223	34.667	12.2584	8.87371	3.96571	2.53365	3.47788	14.3574	4.87849	0.00979439	12.8464	8.34821	1.94359		25.126	5.6423	11.7394	15.6198	4.2091	-0.851833	10.9276	2.71941	14.6036	33.3744	2.32488	14.2443	12.2445	11.0142	5.86845	8.15532	12.6491	2.88422	25.4548	5.16798	10.4206	1.90894
	25.583	5.45553	13.4592	9.21897	3.97911	-4.93305	9.75227	8.50387	6.61425	34.3929	12.2281	9.0489	3.66313	2.45128	3.56128	14.2827	4.91526	0.0928224	12.9	8.31037	1.93446		25.583	5.13486	11.8599	15.1973	4.27549	-1.00747	10.8078	2.71968	13.938	32.0472	2.28749	12.1823	12.5601	11.0555	5.58795	8.13357	12.2354	2.40748	25.0452	4.8228	10.0679	1.85269
	26.04	5.41923	13.7151	9.18021	4.04355	-4.71639	9.66456	8.88215	6.59172	34.7519	12.1842	9.06856	3.39225	2.24108	3.642	14.051	4.78924	0.202617	12.9775	8.33781	1.94848		26.04	4.63357	11.8428	14.7429	4.35264	-1.02561	10.9201	3.19331	13.9494	30.333	2.42821	10.742	12.5333	10.8507	5.21986	8.05991	11.8526	1.77764	25.1231	4.45092	9.78844	1.79805
	26.497	5.44689	13.8701	9.2311	4.11786	-4.3803	9.75775	9.97672	6.76488	35.6578	12.2833	9.28299	3.29901	2.1681	3.6917	13.7778	4.62993	0.31878	13.0799	8.49858	1.98363		26.497	3.95673	11.6271	14.5105	4.37461	-1.00738	11.2714	3.73823	14.1276	28.4424	2.48116	10.0806	11.9975	10.5022	5.08314	7.97878	11.5425	1.49152	25.1603	4.05221	9.54795	1.74001
	26.953	5.45136	13.7189	9.23	4.20947	-3.91858	9.82016	10.5854	6.88372	36.1032	12.3439	9.64367	3.37604	2.1777	3.70167	13.5186	4.54753	0.320818	13.3499	8.61464	1.994		26.953	3.31355	11.2526	14.1784	4.39434	-0.852814	11.3413	3.91453	14.2766	26.8841	2.47557	9.71807	11.1821	10.1633	4.92793	7.86042	10.9089	1.24592	24.875	3.61214	9.24589	1.6861
	27.41	5.46082	13.5146	9.29241	4.22595	-3.80124	9.94358	10.2846	6.71748	35.7834	12.3224	9.78433	3.29583	2.24492	3.63617	13.4078	4.53492	0.382841	13.2113	8.56901	1.97315		27.41	2.92636	11.1414	13.9099	4.37679	-1.13169	11.0084	3.58181	14.4236	25.9296	2.46858	9.46836	10.472	10.1372	4.9355	7.7096	10.2108	0.949093	24.6831	3.26624	8.97193	1.66548
	27.867	5.38936	13.3251	9.34068	4.22047	-3.76125	10.1247	10.1321	6.61291	35.2356	12.102	9.47399	3.07516	2.35845	3.83362	13.3359	4.55876	0.305841	13.4999	8.50907	1.94691		27.867	2.88554	11.1122	13.6024	4.36408	-1.15526	10.4926	3.26664	14.7508	25.2371	2.43704	9.43484	10.1325	10.1372	5.14879	7.69536	9.6928	0.880894	24.6339	3.03023	8.83051	1.64703
	28.324	5.36147	13.244	9.51006	4.15494	-3.44007	10.3728	10.4267	6.52792	34.695	11.962	9.09873	2.94271	2.36887	4.24161	13.3936	4.68535	0.0196075	13.4544	8.5011	1.91828		28.324	2.98557	10.9062	13.3836	4.29306	-1.33194	10.1011	2.87012	14.8406	24.4673	2.41959	9.66281	9.96998	9.93322	5.27538	7.71005	9.34554	0.766927	24.2115	2.89511	8.66872	1.61827
	28.781	5.31491	13.2623	9.7899	4.20632	-2.89187	10.3355	10.6399	6.42882	34.7293	11.962	8.6209	2.7591	2.32759	4.6693	13.0599	4.79414	-0.265864	13.2942	8.50202	1.90887		28.781	3.23818	10.3806	13.3511	4.18288	-1.63256	10.3839	2.39383	14.7365	23.8993	2.32806	9.9186	9.65724	9.70408	5.15316	7.68217	8.9037	0.466447	24.2841	2.91594	8.52353	1.61562
	29.238	5.40834	13.2083	9.8037	4.26752	-2.59011	10.3076	10.9031	6.32085	34.9541	12.0829	8.42119	2.69504	2.06684	4.86601	12.5722	4.71337	-0.363271	13.4005	8.50211	1.91534		29.238	3.17301	9.86064	13.4366	4.07272	-1.72752	10.6391	2.47336	14.5971	22.6572	2.29493	9.93437	9.73926	9.59333	4.94862	7.65153	8.34264	0.153565	24.54	3.06312	8.39177	1.59516
	29.694	5.4559	13.4984	9.46041	4.49605	-2.65144	10.4833	10.9828	6.18243	34.6991	12.0958	8.47081	2.5764	1.63783	4.98222	12.0934	4.66492	-0.25335	13.3397	8.45637	1.90676		29.694	2.94334	9.55404	13.5497	3.97667	-1.86551	10.5794	3.26547	14.495	21.2236	2.2267	9.88062	9.94471	9.30167	4.52671	7.68556	7.66683	-0.168496	24.7572	3.15642	8.24735	1.56987
	30.151	5.43725	13.7355	9.11897	4.70088	-2.72113	10.3365	11.1694	6.18717	34.9389	11.9915	8.46952	2.53779	1.12659	5.15316	11.8529	4.64006	-0.162593	13.1317	8.42467	1.92016		30.151	3.00019	9.15621	13.7134	4.01763	-2.03715	10.5502	4.01317	14.1212	20.009	2.03139	9.95616	10.0885	9.05745	4.12518	7.71512	7.02699	-0.492256	25.367	3.235	8.1397	1.56413
	30.608	5.4225	13.9492	8.82088	4.7081	-2.91084	10.069	10.4657	6.06143	35.4277	12.0025	8.52795	2.36313	0.755236	5.23277	12.3842	4.5907	-0.343986	12.8145	8.35225	1.95423		30.608	2.95246	8.57155	13.4464	4.08349	-2.15103	10.3763	4.29101	13.8421	19.4897	2.01938	9.59795	10.0204	9.0921	3.96461	7.71315	6.62668	-0.708589	26.0039	3.05913	8.0153	1.57245
	31.065	5.40227	13.9112	8.66056	4.43907	-3.22041	9.59174	9.63197	5.90535	35.4293	12.1242	8.3546	2.19461	0.53461	5.20274	12.5923	4.62753	-0.594009	12.7839	8.19842	1.96833		31.065	2.94715	8.35602	12.9802	4.0759	-2.01959	10.6259	4.43211	13.4494	19.0164	1.84959	8.96297	9.75465	8.90764	3.93185	7.72029	6.45275	-0.90035	26.0828	2.81501	7.8653	1.55912
	31.522	5.36905	13.8735	8.58994	4.1778	-3.65818	9.15737	9.2004	5.793	34.2171	12.1185	7.93827	2.34846	0.432724	5.01583	12.1104	4.73592	-0.767626	12.6051	7.95876	1.91993		31.522	3.04334	8.36399	13.1181	3.90343	-1.99566	10.8397	4.43944	12.8816	18.4271	1.68172	8.28567	9.20642	8.52474	3.82847	7.78406	6.27377	-0.995565	25.4901	2.7221	7.67487	1.52534
	31.979	5.40496	13.9049	8.54238	4.10516	-3.81204	8.81238	9.15425	5.67564	32.2316	12.3137	7.64875	2.62443	0.26174	5.09647	11.7191	4.93708	-0.919453	12.25	7.77506	1.83201		31.979	2.67891	8.33432	13.4519	3.84048	-1.91086	10.8951	4.46506	12.2664	17.9399	1.60696	7.79037	8.38762	8.20634	3.74838	8.08595	6.10226	-0.788435	24.7537	2.61832	7.49857	1.48724
	32.435	5.48991	13.7508	8.44288	4.14326	-3.80777	8.69234	9.02635	5.62594	30.8339	12.3083	7.611	2.98092	0.291228	5.03791	11.4675	5.08685	-0.931201	12.0196	7.67054	1.76106		32.435	2.0372	8.29422	13.8486	3.85791	-1.82282	10.6037	4.37449	11.985	17.9199	1.62825	7.60032	7.74604	8.05192	3.70255	8.04024	6.08739	-0.752992	23.2194	2.60846	7.31735	1.43994
	32.892	5.52906	13.8051	8.36169	4.13115	-3.72153	8.49158	8.491	5.48153	29.792	12.3252	7.43095	3.13619	0.37478	4.90449	11.388	5.11145	-0.791864	11.8458	7.56036	1.70817		32.892	1.6891	8.06171	13.7366	3.82688	-1.74225	10.0589	4.1015	11.7791	18.1733	1.73781	7.89215	7.62006	7.99037	3.74867	7.95963	5.97587	-0.828142	21.6664	2.61615	7.16126	1.39354
	33.349	5.69101	13.7621	8.25351	4.06638	-3.66475	8.26708	8.23014	5.3924	28.627	12.2897	7.14248	3.16855	0.525854	4.84473	11.3529	5.31115	-0.778547	11.7226	7.45579	1.65179		33.349	1.76026	7.97403	13.315	3.82816	-1.77752	9.69238	3.5382	11.3032	18.1197	1.74022	8.40287	7.32689	7.85421	3.70637	7.93529	5.97031	-0.952402	20.3976	2.58075	6.98503	1.34892
	33.806	5.90569	13.6471	8.25501	4.27615	-3.75446	8.03371	7.80962	5.40825	27.5035	12.3252	6.78189	3.06773	0.707854	4.94039	11.4537	5.35464	-0.876229	11.7419	7.36565	1.60376		33.806	1.82835	7.94285	12.8583	3.77347	-2.05827	9.70624	3.13264	11.1655	18.0107	1.74301	8.77395	6.90393	7.77915	3.60898	7.80006	5.86488	-0.764374	19.2884	2.54955	6.83723	1.31423
	34.263	6.03864	13.4874	8.33868	4.35225	-4.02516	7.79548	7.70804	5.18903	26.0829	12.429	6.22357	2.67683	0.84348	4.87208	11.11	5.39304	-0.949252	11.8916	7.19209	1.55411		34.263	1.9317	8.04572	12.2724	3.70812	-2.13294	9.71543	3.32283	11.3893	18.1005	1.64709	8.59646	6.78012	7.75329	3.60552	7.41964	5.85693	-0.619569	18.2153	2.54425	6.74485	1.27904
	34.72	6.06221	13.4877	8.52106	4.10244	-4.50168	7.79579	7.92685	5.02384	24.9927	12.5499	5.94417	2.29522	0.63265	4.88723	11.0874	5.38507	-0.806537	11.8293	7.06752	1.53143		34.72	1.92338	8.10097	11.7987	3.7542	-2.27001	9.63717	3.42824	11.5944	17.8464	1.60591	8.18766	6.67416	7.64755	3.56104	7.15608	5.74545	-0.521654	17.422	2.46304	6.61867	1.24771
	35.176	6.14777	13.3274	8.57297	3.84688	-4.87739	7.66269	8.20906	5.25749	24.3864	12.6667	5.65147	1.88025	0.428325	4.88796	11.2597	5.40922	-0.727696	11.6927	6.98233	1.52503		35.176	1.86217	8.18733	11.5537	3.92846	-1.96788	9.40927	3.11475	11.5992	17.2412	1.48148	7.83878	6.57873	7.623	3.584	6.9915	5.4166	-0.620472	16.9723	2.38018	6.48286	1.21517
	35.633	6.20434	13.0396	8.74147	3.69156	-4.79342	7.63228	7.7259	5.28323	24.1122	12.6214	5.5097	1.58601	0.384683	4.78488	11.4521	5.31869	-0.765841	11.4211	6.88611	1.5135		35.633	1.77853	8.32978	11.1561	3.93709	-2.12216	8.7742	2.76506	11.5447	16.6785	1.40705	7.46478	6.48801	7.37939	3.52293	6.88816	4.85432	-0.873301	16.9817	2.39965	6.28181	1.20417
	36.09	6.15105	12.9419	8.81793	3.59196	-4.56375	7.58013	7.2636	5.20042	24.1335	12.6022	5.52874	1.5937	0.464211	4.6625	11.6776	5.29763	-0.757729	11.4105	6.86645	1.50914		36.09	1.64334	8.47275	10.5827	3.78927	-1.9439	7.69754	2.45593	11.3656	16.2406	1.3144	6.8904	6.33588	7.28552	3.40426	6.85934	4.36668	-1.09292	17.0751	2.42697	6.06155	1.18902
	36.547	6.12752	12.8511	8.85658	3.63241	-4.56826	7.52212	7.47799	5.27233	24.6333	12.6623	5.80605	1.61619	0.616024	4.5928	11.8649	5.232	-0.595346	11.3982	6.94435	1.52412		36.547	1.62018	8.23644	10.13	3.68906	-1.83923	6.69804	2.47753	11.2954	15.8912	1.37367	6.61568	6.00495	7.13037	3.25635	7.0916	4.08004	-1.44957	16.8485	2.32902	5.86732	1.17054
	37.004	6.09226	12.7304	8.9453	3.77104	-4.75375	7.38433	7.98203	5.27548	25.7038	12.8642	6.14452	1.62971	0.864211	4.90068	11.8756	5.22115	-0.535509	11.4259	7.08452	1.56466		37.004	1.60845	8.04274	9.46774	3.53065	-1.78519	6.16036	2.44751	11.0914	15.6456	1.44785	6.51095	5.61774	6.83558	3.17283	7.04158	3.77462	-1.76303	16.7016	2.18096	5.67	1.15591
	37.461	6.07159	12.523	9.12009	3.92489	-4.67248	7.40208	8.06392	5.12879	26.3978	12.866	6.36064	1.70479	1.00874	5.28962	11.8372	5.16255	-0.445771	11.5013	7.18026	1.58238		37.461	1.53695	8.03825	8.86075	3.29141	-1.58996	5.89145	2.26288	11.0587	15.4001	1.41783	6.23282	5.5461	6.63558	3.1142	6.98732	3.43526	-1.785	16.9171	2.11412	5.54557	1.15171
	37.917	6.04378	12.2343	9.40307	4.11914	-4.28581	7.14822	7.91643	5.0007	26.1866	12.8808	6.42246	1.75298	1.23882	5.77724	11.8096	5.13211	-0.573617	11.55	7.20871	1.55905		37.917	1.64724	7.93787	8.56964	3.08051	-1.73893	5.59669	2.14285	11.2524	14.999	1.37142	5.9265	5.29158	6.45464	3.11224	6.74983	3.18097	-1.67626	16.9131	2.10371	5.41658	1.14331
	38.374	5.99855	12.4071	9.64508	4.11473	-4.01834	7.02892	7.67672	4.78577	25.3407	12.8093	6.60153	1.78765	1.5535	6.14866	11.8104	5.18072	-0.59936	11.7018	7.22074	1.51851		38.374	1.62464	7.74609	8.27408	3.08974	-1.74099	5.15722	1.67873	11.3428	14.911	1.29419	5.77296	5.30437	6.31152	3.1101	6.45524	3.08698	-1.33765	16.7571	2.0663	5.31076	1.13287
	38.831	5.94728	12.7526	9.64486	3.99278	-4.09629	6.70074	7.37464	4.82578	24.4551	12.7142	6.63233	1.83537	1.7957	6.13179	11.5999	5.12626	-0.499019	11.6667	7.14448	1.48259		38.831	1.44226	7.70677	7.81108	3.06222	-1.78717	4.82512	1.38988	11.0682	14.8654	1.13818	5.61555	5.63197	6.1995	3.25807	6.15027	3.10779	-1.02883	16.4301	1.9915	5.2041	1.11508
	39.288	5.84327	12.6045	9.49492	3.96077	-4.41982	6.22701	7.22319	4.92496	24.2929	12.7181	6.45912	1.80601	1.79836	5.92554	11.3652	4.90726	-0.432621	11.656	7.0197	1.48098		39.288	1.06355	7.64001	7.11904	2.89924	-1.80435	4.68836	1.40284	11.1104	14.7171	1.04362	5.38939	5.80385	6.09371	3.31673	5.95564	3.09176	-0.972728	16.0125	1.96097	5.08061	1.09965
	39.745	5.60342	12.2618	9.60649	4.00799	-4.73968	5.85999	7.24864	4.92583	24.1941	12.6285	6.3327	1.64907	1.51111	5.61138	11.3919	4.75626	-0.343986	11.4344	6.88555	1.48522		39.745	0.921993	7.58301	6.43822	2.68225	-1.68894	4.45858	1.78392	11.4932	14.494	0.921609	5.7312	5.92306	6.17881	3.39871	5.94657	3.14137	-1.17679	15.5608	2.05419	5.04451	1.08561
	40.202	5.44894	11.9942	9.63808	4.03239	-4.9854	5.84965	7.44049	4.98522	23.7593	12.4356	6.25003	1.79291	1.04008	5.32876	11.3167	4.76216	-0.353841	11.6052	6.79669	1.47632		40.202	1.09709	7.63332	6.16887	2.50205	-1.73138	4.05999	1.54868	11.601	14.1036	0.960947	6.09673	6.00427	6.35228	3.34577	5.81357	2.98272	-1.4281	15.2875	2.06878	4.97198	1.07861
	40.659	5.47986	11.8602	9.72266	3.90742	-5.0886	5.89236	7.91283	5.05069	22.8198	12.288	6.24377	1.80567	0.635463	4.96602	11.266	4.72038	-0.221047	11.7829	6.72469	1.44889		40.659	1.16392	7.60331	6.12973	2.30557	-1.74693	3.43631	1.23098	11.4985	13.772	1.03264	6.15215	5.86785	6.63323	3.14366	5.84442	2.81832	-1.65179	15.4548	2.06807	4.88193	1.08508
	41.115	5.59105	11.8587	9.48392	3.73522	-5.10534	5.90684	8.07369	5.0436	22.1848	12.2449	6.22465	1.56579	0.35922	4.80545	11.4916	4.7143	-0.297935	11.8517	6.65178	1.43746		41.115	1.17534	7.59244	6.13749	2.31387	-1.9111	2.78539	1.05563	11.6549	13.3133	1.10214	5.84165	5.73428	6.78488	2.96217	5.73913	2.55197	-1.53577	15.6465	2.23276	4.79879	1.08788
	41.572	5.75211	11.8278	9.21918	3.65403	-4.99143	5.93741	7.94314	4.96061	21.6649	12.3722	6.20136	1.50564	0.0643984	4.81666	11.5522	4.7674	-0.663612	11.8314	6.57863	1.42704		41.572	0.973473	7.53984	6.73846	2.40008	-2.08443	2.88081	0.712802	11.6166	13.0366	1.20567	5.75483	5.72314	6.8956	2.87274	5.76895	2.35671	-1.45196	15.6299	2.22099	4.77846	1.09019
	42.029	5.75473	11.9	8.89454	3.71492	-4.475	5.93555	8.28361	4.79615	22.2084	12.4471	6.11227	1.56431	-0.105008	4.63615	11.5374	4.87665	-1.03795	11.751	6.59971	1.4417		42.029	0.841162	7.34659		2.54137	-2.2015	3.25291	0.315769	11.6538	13.0533	1.25109	5.86456	5.6851	6.91286	2.70297	5.81323	2.32035	-1.39008	15.5943	1.95417	4.63956	1.15313
	42.486	5.67179	11.8768	8.92639	3.77858	-3.99282	5.86839	8.13683	4.80634	22.1302	12.4377	5.86264	1.76252	0.125593	4.39689	11.5346	5.06246	-1.20909	11.623	6.59994	1.42264		42.486	0.644628	7.23753		2.62941	-2.38517	3.71312	-0.0656364	11.567	12.9311	1.35597	5.95271	5.74528	6.94766	2.58459	5.82145	2.23713	-1.75587	15.3196	1.47209	4.55292	1.15914
	42.943	5.48348	11.8364	8.92599	3.85035	-3.71032	5.75999	7.45097	4.66537	20.9093	12.3524	5.50178	1.86598	0.571715	4.1066	11.6696	5.17935	-1.36914	11.4043	6.46967	1.36618		42.943	0.429824	7.06806		2.75231	-2.43182	3.476	-0.247116	11.3152	12.8257	1.61459	6.04617	5.66027	7.05713	2.36922	5.68296	2.24045	-2.17481	15.0634	1.15715	4.43914	1.15824
	43.4	5.31456	11.6944	9.23827	4.12039	-3.62325	5.7669	6.89308	4.4539	19.7189	12.2978	5.18721	2.08919	1.0386	3.72315	11.6881	5.37402	-1.31822	11.5343	6.39952	1.31662		43.4	0.116899	6.87197		2.80694	-2.52612	3.27557	-0.17176	10.9817	12.6456	1.9373	6.07403	5.39276	7.03742	2.35874	5.71052	2.12298	-2.40357	15.0384	1.00919	4.34881	1.15361
	43.856	5.31087	11.4935	9.21043	4.19115	-3.66993	6.04838	6.45539	4.4128	19.0307	12.1453	4.94498	2.35143	1.458	3.39568	11.7578	5.3528	-1.39579	11.2211	6.31747	1.28285		43.856	-0.242318	6.55995		2.70276	-2.49958	3.03582	-0.225554	10.7557	12.1975	2.07531	6.18168	5.29715	7.01071	2.39083	5.8004	1.99082	-2.38479	14.862	0.96702	4.24863	1.13761
	44.313	5.38043	11.556	9.21066	4.07125	-3.59211	6.08122	6.40596	4.41951	19.0584	12.0688	4.83001	2.72861	1.67334	3.2069	11.8616	5.32289	-1.54503	10.9502	6.31604	1.27873		44.313	-0.561419	6.43276		2.48436	-2.41382	2.83878	-0.297074	10.6704	11.8919	2.15636	6.22453	5.3368	7.02394	2.30283	5.81591	1.91565	-2.18108	14.4539	0.829826	4.16248	1.11966
	44.77	5.48542	11.596	9.32119	4.14972	-3.68799	5.9838	6.14378	4.51633	18.7497	11.9868	4.81093	3.11585	1.87515	3.03481	12.0889	5.3182	-1.52625	10.9119	6.32635	1.26858		44.77	-0.822412	6.3588		2.34517	-2.49412	2.7735	-0.232165	10.9838	11.676	2.18698	5.97801	5.46672	6.89911	2.29122	5.83582	1.95639	-2.09603	14.1378	0.875739	4.11779	1.11219
	45.227	5.65529	11.6894	9.3942	4.06414	-3.67707	5.81325	6.31417	4.54875	18.4919	11.9164	4.88466	3.22867	1.91454	2.87878	12.3932	5.32253	-1.55172	10.8214	6.33903	1.2649		45.227	-0.877669	6.31076		2.17377	-2.34945	2.7014	-0.13119	11.0714	11.3766	2.0287	5.75412	5.69907	6.69482	2.17559	5.68806	2.03067	-2.0877	13.8707	0.969957	4.06109	1.09474
	45.684	5.79527	11.8894	9.32906	4.0793	-3.7988	5.54115	6.41915	4.55848	18.4828	12.0344	4.93543	3.12789	1.75604	2.84829	12.4744	5.31519	-1.57793	10.7897	6.33329	1.27609		45.684	-0.856074	6.15934		2.19467	-2.13238	2.77024	-0.0961736	11.2402	11.1307	1.85372	5.5253	5.78575	6.50188	2.17302	5.62111	2.06533	-2.11652	13.4322	0.9264	4.00993	1.07342
	46.141	5.81264	12.2354	9.01435	4.15207	-4.18692	5.36849	6.29018	4.5504	18.8075	12.1344	4.92163	3.17777	1.2685	2.90199	12.6476	5.292	-1.56907	10.7346	6.30852	1.30764		46.141	-0.705797	6.23128		2.15645	-2.29363	2.94106	-0.317554	11.3578	10.86	1.74907	5.24984	5.86212	6.39296	2.39451	5.80702	2.03726	-2.08529	12.9357	0.650299	3.95684	1.06131
	46.597	5.7345	12.3817	8.88818	4.34922	-4.79454	5.31734	6.17092	4.62186	19.4067	12.1527	4.86735	3.10231	0.81787	2.98534	12.7452	5.1972	-1.56529	10.9091	6.29376	1.3527		46.597	-0.563541	6.44946		2.00403	-2.4224	2.73256	-0.512934	11.2678	10.6423	1.63626	4.81863	5.87679	6.40838	2.60555	6.10012	1.91438	-2.00002	12.6458	0.354159	3.88652	1.05574
	47.054	5.69964	12.331	8.76228	4.5024	-5.15171	5.10358	6.43942	4.62581	19.4287	12.0543	4.75117	3.03225	0.885577	2.98174	12.7436	5.14164	-1.67816	10.6328	6.23812	1.35945		47.054	-0.438291	6.69391		1.9608	-2.49827	2.62241	-0.857413	11.2789	10.5851	1.56766	4.27753	5.82155	6.38042	2.6972	6.28924	1.64997	-1.77167	12.4516	0.255345	3.83144	1.05544
	47.511	5.76597	12.3909	8.77605	4.63085	-5.34952	4.92898	6.74232	4.40866	19.5202	11.8729	4.47972	2.72422	0.862846	2.80382	12.8702	5.12764	-1.736	10.7689	6.19936	1.37709		47.511	-0.37002	6.80945		1.89395	-2.65471	2.31638	-0.874347	11.3662	10.6629	1.43663	3.95239	5.93726	6.48749	2.73839	6.25358	1.42509	-1.65863	12.403	0.318533	3.80242	1.06374
	47.968	5.71268	12.5666	8.93323	4.56765	-5.30271	4.86307	7.04251	4.20949	19.6813	11.7361	4.05105	2.41967	0.632138	2.5926	13.2788	5.11229	-1.69435	11.08	6.19345	1.4031		47.968	-0.375331	6.89113		1.75413	-2.59138	2.26642	-0.998355	11.5994	10.9262	1.2839	3.99423	5.62316	6.4445	2.85653	6.26838	1.20701	-1.78956	12.3576	0.500472	3.78991	1.07674
	48.425	5.72836	12.468	9.22257	4.65679	-5.22213	4.77897	7.04296	4.23238	19.4476	11.6866	3.76004	2.18331	0.567171	2.45382	13.3919	4.98027	-1.79751	11.2796	6.15893	1.40551		48.425	-0.629939	6.89277		1.71084	-2.28492	2.43724	-0.824008	11.7851	10.7344	1.126	4.22376	5.28672	6.3984	2.83347	6.10931	1.0306	-2.07554	12.1794	0.815872	3.76386	1.06874
	48.882	5.64789	12.0957	9.4562	4.67117	-5.27508	4.60136	6.96726	4.31751	19.441	11.7289	3.72228	1.81322	0.332691	2.41078	13.1665	4.87758	-1.93955	11.4326	6.08156	1.41201		48.882	-0.782243	6.80707		1.65569	-2.35738	2.71312	-0.624347	11.8153	10.4163	1.16353	4.38126	4.98549	6.37907	2.68883	5.84673	0.979915	-2.03766	12.1816	1.02634	3.73548	1.05718
	49.338	5.63676	11.8233	9.49298	4.58561	-5.30171	4.43483	6.35728	4.21017	19.586	11.8345	3.62173	1.73992	0.18661	2.39652	12.7067	4.69981	-1.91716	11.6975	5.98841	1.4151		49.338	-0.659547	6.64012		1.55563	-2.30997	2.73098	-0.255083	11.4339	9.77942	1.20228	4.30188	4.67088	6.30014	2.59584	5.67742	0.986227	-1.92385	12.2562	0.995649	3.66545	1.02366
	49.795	5.72943	11.6372	9.2078	4.46077	-5.33484	4.43835	5.65229	4.06521	20.0098	11.9049	3.57628	1.71631	-0.037187	2.37807	12.4411	4.55171	-1.92007	11.6793	5.89757	1.42641		49.795	-0.427054	6.44821		1.54124	-2.4093	2.69998	0.0536364	11.0526	9.32446	1.21295	3.85739	4.26102	6.12969	2.65739	5.7292	0.944607	-1.81249	11.9298	0.843226	3.55759	0.986343
	50.252	5.72193	11.7917	9.10987	4.31599	-5.19175	4.41204	5.54725	3.94672	20.1888	12.0891	3.70787	1.77198	-0.192252	2.50757	12.6224	4.5105	-2.02466	11.7456	5.92115	1.43914		50.252	-0.299655	6.39952		1.45287	-2.44595	2.3929	-0.431826	10.579	8.95014	1.26126	3.50101	4.19024	5.80855	2.74709	5.89662	1.075	-1.78635	11.9427	0.795067	3.44601	0.970796
	Figure 6 - figure supplement 2B
	Distance (µm)	Background-subtracted intensity in wild-type embryos normalized to the number of transplanted cells																Mean normalized intensity	SEM		Distance (µm)	Background-subtracted intensity in MZsqt-/-;cyc-/- embryos normalized to the number of transplanted cells																	Mean normalized intensity	SEM
		1	2	3	5	6	7	8	9	10	11	12	13	14	15	16	17					1	2	3	4	5	6	7	8	9	10	11	12	13	14	15	16	17
	0	41.4453	11.5152	7.58843	29.0355	76.9081	12.6501	21.0244	81.2315	26.2081	36.3402	60.6962	18.4571	0.392294	127.525	15.0858	34.6304	37.5458	8.42444		0	42.7145	59.5206	70.3367	32.4406	17.0857	64.4435	50.14	233.905	101.67	22.9409	182.651	151.014	106.626	8.43548	31.805	15.2368	38.1072	72.2984	15.4994
	0.457	39.8872	10.6282	7.27091	27.3458	74.9299	12.3727	20.218	79.9327	25.9108	34.198	59.4871	17.9801	0.446856	127.432	14.7038	35.3017	36.7528	8.38206		0.457	43.4435	55.9772	67.7117	31.1726	16.2859	61.1013	47.907	232.751	98.3963	23.1778	180.003	150.659	104.689	8.45323	32.2977	14.8319	36.5024	70.9035	15.402
	0.914	37.94	9.61909	7.11652	25.3702	72.6562	12.2143	19.4472	77.7147	25.462	33.2121	57.7585	17.6052	0.533508	126.678	14.3867	35.9636	35.8549	8.27855		0.914	43.5272	52.6162	65.3649	30.0062	15.8963	58.948	46.5053	232.618	95.2129	22.9035	177.34	148.755	102.258	8.47076	32.973	14.3184	35.9018	69.6245	15.3041
	1.371	35.7142	9.12491	6.98191	23.0887	70.4173	11.9548	18.7315	75.0211	24.8557	32.8185	56.1519	16.9092	0.674465	125.627	14.2507	36.4773	34.925	8.15354		1.371	44.377	50.1709	62.7443	28.8731	15.4645	57.016	45.5689	232.698	91.8097	22.1272	174.956	144.899	99.4414	8.20314	33.5026	13.8011	36.3403	68.3526	15.1779
	1.827	33.1529	9.53688	6.74212	20.7564	68.6318	11.8261	17.8139	72.1597	23.9834	32.3252	54.9718	15.2987	0.755569	123.965	14.3508	36.8487	33.9449	8.01364		1.827	43.7963	49.3629	59.2489	27.6721	15.0571	54.9471	44.7867	230.752	88.8382	22.597	173.211	138.006	97.1018	7.89791	34.3316	13.7793	37.5908	66.9987	14.9192
	2.284	30.7624	10.1672	6.56884	18.4131	67.1125	11.5982	17.3162	69.3904	22.8165	31.0613	53.448	13.3949	0.808545	121.553	14.5137	37.0553	32.8737	7.8463		2.284	41.66	48.8938	55.4334	26.6637	14.7237	52.8051	44.0964	228.658	86.2095	22.3029	172.228	130.146	95.6118	7.66934	35.5323	13.9754	39.6127	65.6601	14.6792
	2.741	28.6387	9.68818	6.47623	16.1642	65.5425	11.1961	16.6448	66.9884	22.0411	29.5419	52.7067	12.8161	0.790321	118.151	14.694	37.0238	31.819	7.65165		2.741	39.487	48.0179	51.6853	25.5647	14.6809	50.8433	42.9414	226.438	83.8727	21.8807	172.753	123.427	95.4631	7.60246	36.8289	14.0024	41.958	64.5557	14.5189
	3.198	27.3583	10.1485	6.34728	14.5448	63.3398	10.8597	15.9911	65.0056	21.8923	28.0208	52.7105	12.9303	0.723261	113.497	14.5943	36.4759	30.9024	7.37981		3.198	35.3953	46.9943	47.8138	24.3247	14.8996	48.4796	41.7882	224.885	82.2102	21.4564	174.909	116.881	95.5861	7.60902	37.5406	13.9273	43.8873	63.4463	14.4756
	3.655	26.9035	9.82276	6.01878	13.8433	60.1364	10.5151	15.52	63.3841	21.5967	26.6174	54.1654	12.8455	0.615341	108.881	14.3835	35.133	30.0239	7.12421		3.655	32.1244	46.2022	44.2841	23.3926	15.0731	46.2429	40.6189	226.018	80.8231	21.3583	176.603	109.964	95.505	7.75118	37.9198	13.9073	45.3246	62.536	14.5304
	4.112	26.2309	10.2206	5.70246	13.3227	56.3086	10.3617	15.9422	62.1	21.1196	25.4105	56.1547	12.7236	0.509779	105.076	14.0049	32.8489	29.2523	6.89909		4.112	29.0906	45.2196	41.4823	22.8145	15.5844	44.1524	39.5149	232.205	79.9531	21.5811	178.591	103	94.7226	8.00321	38.2676	13.568	45.7879	61.9729	14.8098
	4.568	25.4034	10.1418	5.53316	12.6915	52.0934	10.4139	16.2126	61.4559	20.5834	24.2696	56.8926	12.8716	0.428749	101.634	13.2148	30.6889	28.4081	6.69288		4.568	26.8435	44.3337	40.1063	22.349	16.0029	42.656	39.092	241.14	79.3662	21.1309	181.28	96.4514	93.8344	8.21073	39.1485	13.1526	45.9174	61.8245	15.2389
	5.025	24.8588	11.041	5.47285	12.1334	48.3036	10.4138	15.5786	61.5422	20.1096	23.1797	55.6302	12.0246	0.430833	98.7026	12.4455	28.9996	27.5542	6.50653		5.025	24.7562	43.7836	40.3612	21.6023	15.9389	42.073	39.2025	248.509	79.0156	21.4333	183.365	90.6474	93.1805	8.39547	39.7992	12.4136	45.7679	61.7791	15.5994
	5.482	24.568	11.4082	5.41934	11.8567	45.0461	10.3456	14.7823	61.9828	20.0519	22.6018	54.167	11.4844	0.459047	95.93	11.7483	27.7861	26.8524	6.34272		5.482	23.5658	43.3487	40.6586	20.899	15.7984	41.9804	39.9964	254.133	79.0497	20.9475	184.99	85.9725	92.0111	8.56426	40.5789	11.6008	45.6858	61.7519	15.8812
	5.939	23.9698	12.1162	5.25233	11.5577	42.4728	10.1586	14.4585	62.2534	19.5776	22.4168	54.0856	10.7777	0.442692	93.9038	10.9876	26.5976	26.3143	6.24787		5.939	22.2822	43.4573	41.2781	20.4868	15.7901	42.1755	41.4005	257.374	79.2827	21.5673	185.18	81.7383	90.1139	8.58534	41.1277	11.4154	45.6644	61.7011	15.996
	6.396	23.057	12.5671	5.1762	11.1229	39.7202	9.95355	13.8813	61.7398	19.0743	22.4811	55.6419	10.052	0.329967	92.802	10.531	25.5806	25.8569	6.2142		6.396	20.8508	43.2816	41.6105	20.4246	15.5364	42.0974	42.9979	259.914	80.0173	21.2765	183.996	79.9409	88.7177	8.52189	41.8183	11.46	44.7156	61.5987	16.0758
	6.853	22.3157	13.0849	5.11136	10.8437	37.3115	9.8354	13.6977	60.9482	18.248	22.2201	57.8466	9.41293	0.193482	93.0671	10.2567	24.4798	25.5546	6.25269		6.853	20.07	42.4287	41.8456	20.5322	15.0641	42.3724	44.4567	263.171	80.71	21.8762	181.238	80.8749	87.8317	8.41002	42.6183	11.047	43.1391	61.6286	16.1599
	7.309	21.2936	13.7956	5.14694	10.7097	35.3425	9.71311	14.3072	60.2683	17.6877	22.398	59.6667	9.49118	0.195565	93.1633	10.0922	23.4987	25.4231	6.2657		7.309	18.7804	41.2371	42.4294	20.9445	14.7881	42.2	45.4553	266.406	81.5889	21.5358	177.685	83.0484	87.1248	8.27091	43.2281	10.4245	41.5646	61.5713	16.2513
	7.766	19.9492	14.1338	5.0682	10.8699	33.288	9.70743	14.2649	59.7987	17.0067	23.0453	61.451	9.46563	0.243619	92.7834	9.7986	22.6612	25.221	6.27502		7.766	17.3787	40.2971	43.3038	21.3104	14.8559	41.749	46.2094	268.866	82.2272	21.783	174.397	85.5791	86.54	8.09197	43.3689	10.0641	40.2189	61.5436	16.3129
	8.223	18.7522	13.9659	4.96663	11.0059	31.7233	9.7537	13.9318	58.9621	16.5605	23.7386	63.231	9.41183	0.322274	93.213	9.52581	21.8068	25.0545	6.32474		8.223	16.5829	39.6801	43.8404	21.4951	15.0068	40.9413	46.8035	269.725	82.4652	21.5624	170.58	88.1778	84.7908	8.01246	42.9813	9.99248	38.9344	61.269	16.2829
	8.68	17.6987	13.5268	4.89206	11.2549	30.3699	9.6479	13.775	58.0899	16.7343	23.9555	65.3032	10.571	0.444318	93.9086	9.12028	20.7207	25.0008	6.38601		8.68	16.5993	39.1753	44.1947	21.65	15.0142	40.1675	47.0827	268.704	82.4468	21.9357	167.727	90.8164	82.6116	7.82393	41.9773	9.99065	37.8399	60.9269	16.1817
	9.137	17.2326	13.0733	4.7784	11.5795	29.6607	9.68326	13.7816	57.9448	17.2383	23.567	66.6259	11.0726	0.535227	94.5458	8.76955	19.4938	24.9739	6.44755		9.137	15.6932	38.9909	44.4323	21.5654	14.9571	39.2618	46.912	265.495	81.5267	22.8937	166.175	92.3557	80.2144	7.62994	40.9556	10.0019	36.3218	60.3166	16.0096
	9.594	17.3794	13.5871	4.7166	11.8521	29.3986	9.52752	13.9696	57.9705	17.6694	23.3553	66.3572	10.8674	0.453866	94.2688	8.41434	18.1374	24.8703	6.4321		9.594	16.3972	38.9236	44.1326	21.4644	14.668	38.5786	46.5439	258.392	79.9029	22.4345	163.853	93.2195	78.4574	7.58974	39.599	10.3017	34.5363	59.3526	15.6299
	10.05	17.7992	13.4478	4.81307	11.7488	29.9826	9.25083	13.7454	57.9924	17.0681	23.1975	65.4904	11.2151	0.316635	92.2019	8.24657	17.0378	24.5971	6.33079		10.05	17.2957	39.1053	44.1022	21.2744	13.9967	37.9614	46.3779	247.816	78.2294	22.746	160.377	94.4608	77.11	7.59685	37.9476	10.4743	32.7004	58.2101	15.0645
	10.507	18.6018	13.0408	4.86294	11.7711	31.6217	8.87738	13.1762	57.7047	15.9395	23.545	64.3592	10.3588	0.233465	89.6519	8.16705	16.2847	24.2623	6.21464		10.507	17.6612	39.2738	44.486	21.1175	13.1168	37.4324	46.5513	235.693	75.7257	22.6568	156.053	94.6065	74.8372	7.41707	36.9442	10.3978	31.1572	56.7723	14.4034
	10.964	19.1497	13.373	4.93545	11.8423	33.8964	8.71305	12.2485	56.8977	14.9983	23.8773	63.2398	9.52531	0.176712	86.9998	8.18786	16.0568	24.0074	6.08265		10.964	17.4672	39.2127	44.5719	20.7524	12.721	36.9677	46.0319	225.687	73.2551	24.4369	150.916	93.7569	72.5111	7.2604	36.1581	10.2157	30.0044	55.4074	13.8006
	11.421	19.0582	14.6009	5.01522	11.899	36.0203	8.66918	11.46	56.139	14.1741	23.7925	62.4869	9.09584	0.124538	84.7378	8.06617	16.4213	23.86	5.97195		11.421	18.1643	39.4652	43.947	20.0135	12.2	36.3853	45.4767	218.045	71.2427	24.5891	146.395	91.6192	70.6807	7.20863	35.7132	10.2887	29.2511	54.158	13.3162
	11.878	18.9255	14.9213	5.06937	11.8265	38.0779	8.34533	11.2378	55.2214	13.4779	23.322	61.3026	8.18553	0.0988328	81.752	7.99103	16.8781	23.5396	5.83044		11.878	19.37	39.5574	42.3893	19.195	11.6424	35.6884	44.6594	209.594	69.8232	25.7451	144.405	89.5834	69.7423	7.30369	35.434	10.4138	28.6027	53.1264	12.8586
	12.335	18.8861	14.7419	5.10767	11.6137	40.5311	7.99096	11.1095	53.7939	13.2841	22.9079	58.922	7.53119	0.0788428	77.8177	8.06367	17.2198	23.1	5.61544		12.335	20.4574	38.96	40.0475	18.529	11.1931	34.8078	43.5387	201.16	68.4432	26.3509	142.117	87.616	69.2064	7.38461	34.5545	10.4873	28.3022	51.9504	12.4119
	12.791	18.7233	13.8812	5.14316	11.4737	42.8742	7.78664	11.0092	52.5286	13.2368	22.891	54.4157	6.60082	-0.0179967	72.5959	8.35381	17.7041	22.45	5.31265		12.791	22.1509	37.8677	37.3345	17.7203	10.8883	33.8297	41.9983	194.019	66.1357	26.4205	139.517	85.0422	68.0737	7.29061	33.2434	10.7569	27.9941	50.6049	12.0094
	13.248	18.3303	13.4812	5.04938	11.3837	45.487	7.46221	10.9977	51.485	13.0466	22.6732	48.5271	6.07841	-0.0956187	66.0165	8.42176	18.2651	21.6631	4.95792		13.248	20.838	36.6852	34.923	16.5806	10.7403	33.6188	39.6053	188.796	63.1758	27.9689	137.356	80.5767	66.8014	7.18867	31.9901	11.4228	27.6012	49.1688	11.6941
	13.705	17.9492	12.5193	5.10233	11.3927	48.1232	7.04192	10.9698	50.8764	12.7535	22.2993	44.1037	5.7016	-0.193261	59.829	8.19795	18.5208	20.9492	4.70564		13.705	19.5878	34.9793	32.3306	15.3511	10.5024	33.4302	36.7328	187.672	60.3381	27.7796	135.779	75.4115	65.8348	7.21361	30.8219	11.8641	26.8156	47.7908	11.5984
	14.162	17.8483	11.7153	5.07147	11.7312	49.9629	6.31991	11.0257	50.1586	12.8026	21.8837	40.5333	4.74008	-0.175689	55.5439	8.04296	18.5433	20.3592	4.54734		14.162	18.2006	32.1001	29.985	14.5059	10.0174	33.255	34.1948	190.326	58.4808	28.0734	134.549	71.4212	64.6416	7.23893	29.6021	12.0644	25.8968	46.7384	11.7057
	14.619	17.8739	11.5229	5.03367	12.012	50.5381	5.36942	11.1536	48.8957	13.2567	21.6739	37.8747	3.66563	-0.167328	53.6693	7.97954	18.4921	19.9277	4.44674		14.619	17.8822	28.9554	28.4715	13.9587		33.3283	32.0502	193.56	56.6425	29.07	132.658	67.8695	62.9673	7.29616	28.3043	12.4621	25.0354	48.157	12.3357
	15.076	17.9633	10.3626	4.85597	12.1492	49.879	4.61838	11.3482	47.8812	14.0545	21.8929	35.7553	3.64725	-0.22505	52.0444	7.92322	18.0048	19.5097	4.33302		15.076	16.6799	26.7719	27.9021	13.8071		33.4854	30.3206	195.495	55.2526	28.9381	131.003	63.9006	61.1668	7.4074	26.966	12.4756	24.4518	47.2515	12.4016
	15.532	17.8236	9.94125	4.67365	12.2483	48.8913	3.88815	11.666	47.3099	14.5909	21.835	34.3183	2.47699	-0.359117	51.3032	8.01834	17.4347	19.1288	4.27569		15.532	16.6915	25.4129	27.3441	14.1512		33.5783	29.2512	196.736	54.4901	30.2352	129.532	58.9565	60.0797	7.62099	25.9707	12.2337	24.047	46.6457	12.4089
	15.989	17.2255	9.76458	4.5982	12.5259	46.8682	3.45037	11.9144	47.2396	14.9885	21.8846	33.7444	2.09866	-0.380569	51.289	8.38172	16.9559	18.9093	4.2162		15.989	16.7469	24.5173	26.7517	14.7114		33.7469	28.2296	196.865	54.0092	29.3783	127.556	54.5781	59.856	7.63177	25.4153	12.019	23.7331	45.9841	12.3654
	16.446	16.4343	9.85859	4.38284	12.8893	44.6798	2.86924	12.1295	47.5036	14.7675	21.4046	33.8541	2.01528	-0.293398	51.7953	8.62597	16.5009	18.7136	4.19007		16.446	15.6356	24.0312	26.5043	14.8964		33.8775	27.2745	195.153	53.7907	29.3929	125.167	51.0347	59.5181	7.50512	24.6384	11.8889	23.3795	45.2305	12.2325
	16.903	15.7127	9.67076	4.23535	13.1482	42.4668	2.22501	12.6429	47.7974	14.501	21.1586	34.0041	2.43107	-0.167054	52.1722	8.74939	15.9297	18.5424	4.161		16.903	15.7736	24.1748	26.1402	14.8942		33.8241	25.9341	191.207	53.3437	29.7353	121.865	48.2528	58.8301	7.37393	23.3151	12.026	22.3578	44.3155	11.9558
	17.36	15.3775	9.62589	4.13569	13.3482	40.3466	1.68462	13.5756	47.4293	14.2116	20.871	34.2077	2.02378	-0.0766622	52.0256	8.61002	15.0727	18.2793	4.11431		17.36	15.369	24.9463	25.1869	15.0378		33.1485	24.3519	187.597	52.2819	30.0224	118.383	46.4052	58.2499	7.32548	21.7913	12.1033	21.3409	43.3463	11.7024
	17.817	14.5204	9.94145	4.02195	13.1615	38.1095	1.13743	14.6364	46.831	13.3944	20.1347	35.1113	2.2391	-0.101288	51.2509	8.31386	14.0937	17.9248	4.04988		17.817	14.8285	25.4754	24.3378	14.9177		32.111	22.6722	185.376	50.8599	30.4287	115.657	44.2992	57.9435	7.37527	20.4165	11.7905	20.7132	42.4501	11.5487
	18.273	13.6845	10.1421	4.00969	12.8697	34.9378	0.705694	15.8972	45.8429	12.529	19.8156	36.1508	2.17836	-0.179047	51.0114	7.85272	13.2138	17.5414	3.99155		18.273	14.6113	25.7069	23.5434	14.7356		30.9515	21.5631	183.549	49.4148	29.0269	113.351	42.1333	57.938	7.40867	19.2376	11.5716	19.7745	41.5323	11.4337
	18.73	12.7741	10.3034	4.00012	12.4315	32.6019	0.356682	16.8434	44.6468	11.9624	19.7502	36.6994	2.51084	-0.22689	50.6451	7.3501	12.6802	17.2081	3.93073		18.73	14.1486	26.0072	22.9204	14.5054		30.2281	21.0612	180.288	48.0222	28.5682	111.189	39.4561	57.3611	7.48179	18.2467	11.4314	18.5798	40.5935	11.2371
	19.187	11.7983	10.2267	3.84228	12.0045	30.9121		17.0164	43.6909	12.0283	19.8529	37.6614	3.03372	-0.37686	49.6154	6.94351	12.6363	18.0591	3.96463		19.187	14.4799	26.6262	22.8001	14.3795		29.5664	21.0574	176.322	46.8481	27.7853	108.385	37.1366	56.6476	7.32418	17.6638	11.3754	17.6643	39.7538	10.9688
	19.644	10.7685	10.5616	3.66357	11.7145	29.0423		16.8952	43.467	11.722	20.0546	38.1637	3.24251	-0.620565	48.5662	6.64013	12.8154	17.7798	3.921		19.644	14.3215	26.7984	22.6204	14.2215		28.9247	21.3261	172.176	45.1725	27.479	105.654	35.909	56.0972	6.97006	17.5691	11.0788	16.6739	38.937	10.6982
	20.101	9.82923	10.401	3.40121	11.3164	27.1037		16.7255	43.5066	11.5918	20.3637	37.8406	2.73193	-0.753341	47.7086		12.8378	18.1861	4.09453		20.101	14.9022	26.6107	21.9338	13.9886		28.2163	21.6123	166.437	43.1086	27.2838	103.47	35.1336	55.1804	6.68355	17.5076	10.4687	15.4165	37.9971	10.3597
	20.558	8.96377	9.5388	3.24523	10.7115	25.3081		16.1643	43.6551	11.3031	20.5983	37.1664	2.82727	-0.878107	46.7842		12.6349	17.7159	4.0605		20.558	15.2777	26.3712	20.9534	13.6697		27.4484	21.8565	159.247	41.3353	26.7037	102.316	34.1547	54.1206	6.50279	17.5452	9.72109	13.8845	36.9442	9.98555
	21.015	7.92249	9.03566	3.31397	10.2616	24.1756		15.3837	44.2889	10.7088	20.506	37.0279	2.43761	-0.989264	46.209		12.49	17.3409	4.08554		21.015	16.1756	26.296	20.2308	13.2923		26.8342	22.0422	152.005	39.8447	26.3718	101.942	32.7799	53.5835	6.29216	17.2493	8.85801		37.5865	10.1643
	21.471	6.98855	7.9589	3.50089	9.73609	23.5185		14.8158	44.8738	10.2091	20.2396	37.1948	3.39368	-1.04796	45.8053		12.3378	17.1089	4.1056		21.471	16.0154	26.0212	19.4835	12.652		26.2455	21.7605	145.893	38.6109	26.6389	102.147	32.3811	53.164	6.09537	16.8783	8.22195		36.8139	9.87793
	21.928	6.30325	7.77643	3.44832	9.30067	22.5959		13.828	45.255	10.0522	19.6635	37.7909	2.83753	-0.977559	45.8914		12.407	16.8695	4.15966		21.928	15.2639	25.9372	18.4565	11.8932		25.6394	21.1782	142.084	37.3731	25.9219	102.096	32.4827	52.2509	5.89447	16.4456	8.2337		36.0768	9.71237
	22.385	5.58653	7.38676	3.40687	8.7794	21.819		13.5047	45.6151	10.2227	19.1447	37.4578	3.88785	-0.885659	46.9138		12.4809	16.8086	4.19636		22.385	14.9132	25.7626	17.6453	10.9898		24.9854	20.3561	141.097	35.7253	26.0158	101.013	32.7873	50.7778	5.66766	15.9241	8.74145		35.4935	9.6463
	22.842	5.10182	7.35484	3.46751	8.38682	21.3973		13.3065	45.5675	10.5305	19.2134	36.095	3.50434	-0.921114	48.236		12.6203	16.7043	4.22532		22.842	14.4849	25.3335	16.7158	10.1458		24.194	19.5998	140.908	33.8057	27.2311	99.7763	33.0155	49.3805	5.45698	15.6053	8.95553		34.9739	9.61958
	23.299	4.98447	6.37762	3.66166	8.01448	21.7267		13.2672	44.8522	10.7998	19.5499	35.0762	3.89243	-0.977147	47.9769		12.6471	16.5607	4.17368		23.299	14.3705	24.8211	16.0033	9.52121		23.7756	18.8091	140.046	32.2172	26.9673	98.6319	32.5348	48.4504	5.30489	15.7617	9.21769		34.4288	9.55734
	23.756	4.80192	5.08761	3.76519	7.61435	22.0067		13.6511	44.0815	11.1532	20.1435	34.9134	4.16759	-1.04434	46.4715		12.4846	16.3784	4.102		23.756	14.8617	24.4271	15.9677	9.19498		23.4664	18.0922	138.549	31.0126	27.3562	96.9026	32.0986	48.2329	5.02831	16.0695	9.28418		34.0363	9.43161
	24.212	4.48606	4.29905	3.71801	7.37754	21.9785		14.4819	44.0038	11.9843	20.845	35.294	4.95653	-1.08481	43.9647		12.4208	16.3375	4.01637		24.212	13.943	23.9708	16.2364	9.19938		23.1662	17.4114	136.894	30.0759	28.188	95.3376	31.5691	48.4692	4.62717	16.3443	9.17905		33.6408	9.31682
	24.669	4.18861	4.21602	3.66392	7.39982	22.1884		15.4158	44.1457	12.5133	21.3746	35.8428	5.60576	-1.07912	41.174		12.2544	16.3503	3.93343		24.669	12.2985	23.048	16.4215	9.26679		23.0388	17.046	135.46	29.9628	27.8625	93.513	30.8092	48.8261	4.30733	16.5496	8.96245		33.1582	9.21735
	25.126	4.39658	4.15783	3.43598	7.13723	22.4939		16.2321	43.9852	12.6453	21.8615	37.1447	6.94529	-1.15337	38.0672		11.7992	16.3678	3.85758		25.126	11.2213	22.1186	16.1545	9.40649		23.1135	16.9274	134.752	30.0003	28.1684	90.6444	29.9687	49.0204	4.21661	16.6797	8.77815		32.7447	9.11417
	25.583	4.67458	4.41085	3.27622	7.02367	23.004		16.8498	44.5394	12.5681	22.1886	37.4028	8.16519	-1.18139	35.3354		11.3073	16.3975	3.79974		25.583	10.6864	20.995	15.5608	9.59626		23.1794	17.0386	135.005	30.1932	28.7972	86.5822	29.0739	48.5605	4.01146	16.5445	8.77533		32.3067	9.02246
	26.04	5.09047	4.73473	3.13827	7.24295	23.172		17.6577	44.9766	12.9508	22.7745	36.7856	9.22053	-1.16791	33.8314		11.0915	16.5357	3.74153		26.04	10.2074	19.6396	15.6129	9.80637		23.3781	16.8174	136.884	30.5414	28.5583	82.0242	28.4661	47.9243	3.66223	16.3988	8.71111		31.9088	9.01465
	26.497	5.5985	4.31463	3.08829	7.33796	23.3085		18.5506	45.3459	13.5997	23.0594	35.2908	9.44223	-1.03736	32.8778		10.9594	16.5526	3.68736		26.497	10.1399	18.1649	16.1656	9.94194		22.9705	16.4239	140.111	31.2363	28.9019	77.714	27.4286	47.2501		16.148	8.51634		33.6509	9.5321
	26.953	5.92109	4.22788	2.88925	7.11174	23.5693		19.6952	45.7385	14.5146	22.6719	33.2574	10.7966	-0.896013	31.5079		10.6286	16.5453	3.60758		26.953	9.50749	16.9748	16.9472	10.0686		22.542	15.8145	145.137	32.027	29.9428	74.326	26.388	47.0183		16.0529	8.1692		33.6368	9.78562
	27.41	6.04575	4.07951	2.63835	6.77005	23.8399		20.6033	45.5341	15.57	22.424	31.5232	11.9613	-0.849023	29.8038		10.4278	16.4551	3.52475		27.41	9.61584	16.2758	17.9395	10.2982		22.0585	14.8508	150.378	32.5746	30.7344	71.8327	25.7288	47.1111		16.3788	7.87368		33.8322	10.0708
	27.867	5.66323	3.91271	2.56062	6.44951	24.0799		20.8971	44.7385	15.8733	22.1594	29.8862	12.4058	-0.855468	27.4093		10.167	16.0962	3.42247		27.867	10.0719	15.9937	18.7955	10.4199		21.9564	13.7423	154.07	33.1393	31.6065	69.2666	25.1251	46.422		16.9067	7.77092		33.9491	10.2495
	28.324	5.00212	3.48089	2.49159	6.20582	23.8247		20.7491	43.7279	15.5359	21.3684	28.256	12.9682	-0.785963	25.0545		10.0105	15.5636	3.31007		28.324	10.3909	15.7868	19.3456	10.4756		22.313	12.875	157.349	33.6241	32.4705	66.2625	24.5286	45.2948		17.3405	7.80067		33.9898	10.3986
	28.781	4.71944	2.79405	2.38975	6.1303	23.5293		20.0499	43.1857	15.2103	20.7424	26.5203	13.7362	-0.679732	23.3721		10.1042	15.1289	3.22428		28.781	11.3249	15.3065	19.7205	10.2636		22.5349	12.1116	160.039	33.925	33.5822	63.4242	23.9135	44.5215		17.3718	7.40994		33.9607	10.5324
	29.238	4.69167	2.59072	2.22139	5.93856	23.1416		18.9577	42.2031	14.6367	20.5671	25.5235	13.2181	-0.636816	21.7367		9.89611	14.6204	3.13311		29.238	11.4882	14.9632	19.8299	10.1171		22.8214	11.4245	161.3	33.3953	35.2712	61.1605	23.4694	44.6131		17.2791	6.97343		33.8647	10.601
	29.694	4.97014	2.58781	2.10238	5.65736	22.9974		17.7713	41.0476	13.6491	20.2966	24.6527	13.2586	-0.637365	20.9376		9.72329	14.2153	3.04138		29.694	11.1187	14.6269	19.9108	10.1606		23.1438	10.8013	161.597	32.3408	35.4117		23.012	44.5791		16.9212	6.80777		31.5716	11.2645
	30.151	5.47939	2.92155	1.96559	5.26002	23.1901		16.7027	40.1313	12.8404	20.3481	23.8339	12.9679	-0.79086	20.5363		9.52206	13.922	2.97612		30.151	10.8854	14.1334	19.6079	10.2723		23.564	10.2056	160.794	31.1466	35.8089		22.6393	43.5249		16.7784	6.7858		31.2421	11.2148
	30.608	5.63294	3.02073	1.9515	5.02196	23.7456		15.9427	39.0747	12.4142	20.035	23.9199	12.8404	-1.11836	19.7938		9.47582	13.6965	2.93128		30.608	11.0589	13.77	18.8427	10.1907		23.7293	9.59124	159.208	30.3089	35.9196		22.1072	42.3235		16.6061	6.86796		30.8096	11.107
	31.065	5.39061	3.71006	1.89313	5.05181	23.9588		15.8658	37.8099	12.0762	19.6651	23.9479	12.9007	-1.53125	19.159		9.69196	13.5421	2.86667		31.065	10.6905	13.606	18.0751	10.0786		23.5244	9.1078	155.993	29.2418	36.0389		21.3444	41.4994		16.4656	7.1087		30.2134	10.8852
	31.522	4.95969	4.33767	1.63673	5.13485	23.9648		16.0434	37.038	11.672	19.7453	23.7767	12.1558	-2.00241	19.0122		9.57131	13.3604	2.84513		31.522	10.0419	13.2951	17.9762	9.96978		23.0457	8.97376	151.692	27.8369	36.1419		20.8069	41.4107		16.3501	7.48353		29.6173	10.5828
	31.979	4.36254	4.34075	1.29505	4.99482	23.4513		15.928	36.4141	11.3339	19.9602	23.631	11.8739	-2.53226	19.4392		9.06381	13.1112	2.85188		31.979	10.3046	13.3957	17.6923	9.77413		22.6862	9.03989	147.046	26.457	36.6357		20.5942	41.2618		16.3806	7.38621		29.1273	10.2456
	32.435	3.993	4.25241	1.02849	4.78283	22.6809		15.869	36.5013	10.7541	20.189	23.5167	10.7272	-2.96395	20.2707		8.53923	12.8672	2.8924		32.435	10.1835	13.7109	16.8654	9.69912		22.4387	8.87646	143.047	25.616	36.423		20.3512	41.5571		16.5622	6.81025		28.6262	9.97
	32.892	3.68835	3.69868	0.884094	4.66077	22.2527		15.8096	37.0384	10.0937	20.6023	23.59	9.93632	-3.2958	20.5797		8.26799	12.7005	2.95834		32.892	11.1051	13.5781	15.596	9.5622		22.3122	8.49883	139.436	25.3166	36.1516		20.2279	41.8678		16.8284	6.39771		28.2214	9.71883
	33.349	3.40155	3.4312	0.74531	4.5207	21.9165		15.5523	36.8453	9.16091	20.4827	23.9949	8.97605	-3.57415	20.7589		8.38306	12.4711	2.98393		33.349	10.3335	13.6735	14.2331	9.35527		22.1163	8.1768	134.69	24.89	35.0887		19.9802	41.5765		17.2827	6.50942		27.5312	9.38739
	33.806	2.90759	3.26613	0.863363	4.30551	20.8979		14.995	35.5508	8.61344	20.3117	24.4803	7.97174		20.9317		8.67904	13.3672	2.89119		33.806	10.1898	13.7553	12.7009	8.90315		21.7182	8.15926	128.785	24.6831	34.6012		20.3571	41.1088		17.7252	7.00498		26.8994	8.96041
	34.263	2.15072	3.3266	1.03829	4.06791	19.6111		14.943	33.932	8.28364	20.1837	25.0718	6.67272		20.8271		8.74517	12.9887	2.84059		34.263	9.53917	13.8774	11.4424	8.46296		20.853	8.13321	125.558	24.7745	33.8064		20.8303	41.209		18.2541	7.2193		26.4584	8.74325
	34.72	1.29161	3.49628	1.16511	3.94982	18.6252		14.9444	32.2348	8.09638	19.8655	25.6564	6.03154		20.3395		8.84855	12.6573	2.77844		34.72	8.71536	13.6378	10.4252	8.15348		20.1344	8.36303	125.346	24.8148	33.5829		20.9743	41.7087		18.2687	7.72808		26.2963	8.7527
	35.176	0.953942	3.99665	1.04648	3.74205	17.6358		14.6318	29.8188	7.90217	19.5668	25.9809	6.28588		19.927		8.82251	12.3316	2.66038		35.176	8.3913	13.366	9.28791	8.11398		19.5158	8.53017	126.937	24.8123	33.4672		20.8506	42.0033		17.8944	8.17051		26.257	8.88928
	35.633	0.92262	4.22824	0.975667	3.72526	17.0057		14.0969	27.9545	7.85979	19.6088	26.33	5.93404		20.4519		8.73101	12.1403	2.60198		35.633	8.55714	12.9576	8.12992	8.1769			8.78687	129.38		33.8714		20.9473	41.9731		17.7081	8.42079		27.1736	10.7874
	36.09	0.699401	4.03361	1.1372	3.64454	16.5848		13.8151	26.269	7.73213	20.1278	26.4569	5.82668		21.3249		8.57426	12.0174	2.57823		36.09	7.64476	12.6714	7.30812	8.08187			9.25466	132.092		33.8006		21.845	42.2082		17.8338	8.61814		27.3962	11.0409
	36.547	0.427701	4.01641	1.14805	3.53586	16.0699		13.9073	24.8466	7.58967	20.8534	26.5575	5.33464		21.835		8.48839	11.8931	2.57626		36.547	7.43147	12.501	6.61095	8.06222			9.84905	134.093		34.7033		22.2182	42.8209		17.593	8.94792		27.7119	11.2298
	37.004	0.115058	4.23488	1.3073	3.35434	15.7425		14.1201	23.349	7.04615	21.2551	26.3759	5.28303		21.6755		8.36521	11.7095	2.53898		37.004	7.0251	12.2977	5.89011	8.16561			10.1984	135.379		34.1175		22.1851	42.8778		17.2938	9.5076		27.7216	11.3475
	37.461	-0.417321	4.46664	1.43726	3.27314	15.7612		14.8251	22.3899	6.72435	21.1541	26.3278	5.27272		21.2208		8.16384	11.5846	2.51714		37.461	6.8335	11.8346	5.35155	8.40778			10.6078	135.829		35.5435		21.7958	41.6039		17.2446	9.90491		27.7234	11.3852
	37.917	-0.576212	4.67322	1.36084	3.33897	15.9476		15.6593	22.1816	6.71126	20.3699	26.472	5.3815		21.1556		8.03466	11.5931	2.50813		37.917	6.78424	11.1708	5.05083	8.42158			10.9595	135.664		34.8633		21.1133	40.8344		17.5113	9.89		27.4785	11.3696
	38.374	-0.610686	4.44942	1.02819	3.36332	16.3442		16.6033	22.069	7.14137	19.6859	26.7476	6.47077		21.1843		7.85036	11.7175	2.51117		38.374	6.49012	10.6698	5.11984	8.62949			11.1253	135.075		34.8254		20.939	40.5027		17.4081	9.89633		27.3346	11.3215
	38.831	-0.908431	3.95396	0.577766	3.29497	16.9005		17.0837	21.9854	8.26119	19.2665	26.6141	6.5967		20.6908		7.42592	11.6725	2.52143		38.831	6.65324	10.4346	5.36373	8.87186			11.1095	133.784		36.0708		21.2103	40.4121		16.9734	10.218		27.3728	11.2075
	39.288	-1.46201	3.55893	0.320456	3.23963	17.1406		17.6955	22.2448	9.78935	19.3865	26.2655	6.52985		20.2784		6.68959	11.6675	2.55406		39.288	6.99359	10.5198	5.6971	9.16161			10.9621	132.846		35.6302		21.378	40.5731		16.6969	10.7053		27.3785	11.1048
	39.745	-2.29585	3.40684	0.417959	3.19255	16.9181		17.947	22.8625	10.8704	19.7425	24.9987	7.00748		19.933		6.16394	11.6281	2.55426		39.745	7.47329	10.5119	6.13301	9.33307			10.7685	129.386		36.2189		20.7661	41.5548		16.5204	11.1345		27.2545	10.8055
	40.202	-3.12336	3.46765	0.480959	3.20886	16.7754		18.0817	23.2061	11.5132	19.9373	24.2907	7.45964		19.8672		5.78069	11.6112	2.57002		40.202	7.95216	10.5062	6.2553	9.36398			10.4729	124.076		37.9834		19.3766	42.6503		16.3487	11.5658		26.9593	10.3785
	40.659	-3.85946	2.97779	0.602199	3.23592	16.566		18.3005	23.5715	11.7545	20.1888	24.4818	6.93572		19.6088		5.47221	11.5259	2.63145		40.659	7.13056	10.407	6.15989	9.11118			10.0478	118.714		37.7297		17.8885	43.343		16.0363	11.4348		26.1821	9.97434
	41.115	-4.26845	2.72675	0.403497	3.27421	16.7311		19.0125	24.0154	11.9052	20.6687	24.3857	7.5605		19.7821		5.53063	11.6714	2.6872		41.115	6.48281	10.2813	6.15392	8.73752			9.67764	112.94		38.388		16.998	43.0196		15.4335	11.0886		25.3819	9.53409
	41.572	-4.6159	2.57342	0.054883	3.27944	17.0283		18.9778	24.6061	12.2508	21.5483	24.0317	8.35462		20.0409		5.82836	11.843	2.73659		41.572	5.45342	10.3228	5.85527	8.55982			9.28205	106.818		39.1227		16.1506	41.9415		14.8869	11.1232		24.5014	9.06158
	42.029		2.47002	-0.149585	3.27777	17.1431		18.5717	25.3783	12.6961	22.229	23.2604	9.24028		19.7375		5.99286	13.3206	2.57859		42.029	5.09242	10.3859	5.50691	8.56838			8.88153	100.841		39.781		15.6086	41.5903		14.4885	11.6571		23.8547	8.59577
	42.486		2.60145	-0.382626	3.15198	16.921		17.6165	26.0418	13.0477	22.5001	22.9403	8.46841		18.8442		5.94144	13.141	2.58832		42.486	6.00211	10.2916	5.17704	8.5566			8.48746	95.6864		40.8254		15.5003	41.3857		14.4204	11.836		23.4699	8.19005
	42.943		2.84205	-0.701766	3.01068	16.8492		16.6464	26.9394	12.6289	22.2359	22.7021	7.83072		17.9553		5.614	12.8794	2.60877		42.943	6.27272	9.87426	4.84654	8.76047			7.7476	91.8325		41.035		15.1414	41.1646		14.5883	11.8732		23.0124	7.90079
	43.4		2.57313	-1.00844	3.00565	16.6794		15.6303	28.1789	12.3914	22.1661	21.9843	8.15884		17.2326		5.20046	12.6827	2.64257		43.4	6.91961	9.43959	4.73965	9.02663			7.25689	90.1857		40.9347		14.804	39.9702		14.758	11.6285		22.6967	7.74947
	43.856		2.4692	-1.21208	2.9803	16.763		15.1332	29.0249	12.6439	22.1797	21.3719	7.46191		16.6626		4.73494	12.5178	2.68677		43.856	7.66268	8.9917	4.56316	9.24053			7.07444	88.9412		39.9183		14.6707	38.9938		14.6894	11.021		22.3424	7.61684
	44.313		1.53369	-1.28544	2.7743	16.7888		14.8769	29.2001	12.8817	21.4799	20.3327	7.13447		16.0213		4.3878	12.1772	2.69076		44.313	7.49891	9.06416	4.31352	9.21057			6.62246	87.6546		38.8587		14.3826	39.1383		14.7647	10.406		21.9922	7.52193
	44.77		1.09885		2.44471	16.7385		14.595	28.6845	12.5037	20.5029	19.9993	6.85167		16.2637		4.1667	13.0772	2.60685		44.77	7.0703	9.29381	3.80953	9.06434			5.94296	86.7762		38.6042		14.2658	39.9016		14.7605	10.0082		21.7725	7.50029
	45.227		0.310627		2.37719	16.2303		14.449	27.6803	12.0753	19.7274	19.7953	6.89948		16.3269		3.80676	12.6981	2.56904		45.227	6.6326	9.52861	2.89561	8.8482			5.63489	86.0656		37.3106		14.595	40.982		14.6187	9.74183		21.5322	7.47953
	45.684		0.337161		2.42458	15.1577		14.3853	26.397	11.7026	19.1318	19.2711	6.28267		15.8492			13.0939	2.56039		45.684	5.76493	9.75757	1.74614	8.61752			5.45644	85.8548		37.5587		15.3543	41.6889		14.1372	9.29492		21.3847	7.53589
	46.141		0.189255		2.54293	14.0836		14.4104	24.8859	11.3307	18.7497	19.4848	6.15124		15.6516			12.748	2.47005		46.141	5.77155	9.86784	1.07658	8.24813			5.14301	87.5686		37.7619		15.7692	41.4012		14.2812	8.98528		21.4431	7.69301
	46.597		0.79213		2.73045	12.9739		14.9674	23.2902	10.8163	18.378	19.7559	5.23484		16.1454			12.5085	2.38366		46.597	5.93022	9.84794	0.517063	7.92692			4.8826	89.8604		38.2701		15.6673	40.8572		14.6835	8.68986		21.5576	7.89273
	47.054		0.818248		2.67679	12.1958		15.8699	21.5066	10.0761	18.1829	19.8694	5.05227		16.0645			12.2313	2.32249		47.054	5.40913	9.6529	0.16543	7.9537			4.79126	90.7887		37.4413		15.563	40.3895		15.4145	8.19727		21.4333	7.96479
	47.511		0.741398		2.49636	11.9319		16.8888	20.0125	9.70625	17.9935	20.3218	5.50203		15.8003			12.1395	2.29029		47.511	4.84446	9.21287		8.00553			4.82303	90.9949		38.2734		15.3963	40.174		16.173	7.71435		23.5612	8.53842
	47.968		0.875161		2.3909	11.9751		17.2401	19.2308	9.49642	17.7699	21.0617	4.5882		15.112			11.974	2.31451		47.968	4.75012	8.71095		8.06872			4.99855	90.5267		38.5384		15.4361	40.1962		16.5177	7.40822		23.5152	8.51203
	48.425		0.870758		2.29136	12.0421		17.6232	18.9517	9.70284	17.1492	21.5901	3.37915		14.5008			11.8101	2.36183		48.425	5.04983	8.48836		7.83874			5.14014	89.1792		38.1084		15.1335	40.987		16.4316	7.42884		23.3786	8.4058
	48.882		0.957578		1.97108	11.9278		17.7654	18.7066	10.6246	16.33	22.3178	2.91053		14.1022			11.7614	2.3905		48.882	5.84471	8.11322		7.57237			5.27546	87.9649		38.6932		14.887	41.6911		16.2674	7.41011		23.3719	8.32465
	49.338				1.53933	12.0194		17.4875	18.0728	10.8299	15.5316	21.857	2.74024		13.9333			12.6679	2.27573		49.338	6.27796	7.61767		7.31291			5.61367	86.9587		39.7703		14.8704	42.4475		16.2663	7.08436		23.422	8.28502
	49.795				1.13948	11.8725		17.2278	17.5093	10.8333	14.9237	20.5816	3.37903		13.5356			12.3336	2.15664		49.795	6.4083	7.41933		7.19683			5.88751	86.4516		40.9413		14.5632	42.7083		16.3999	6.76376		23.474	8.28193
	50.252				0.777708	11.489		17.5288	17.3598	10.87	14.5259	19.1342	3.63597		13.0503			12.0413	2.09197		50.252	5.84861	7.37521		7.0556			5.90526	85.486		42.621		14.1101	43.0034		16.2305	6.65605		23.4292	8.27615
	Figure 6 - figure supplement 2C
	Condition	Embryo	Number of transplanted cells
	Wild type - Animal pole transplants	1	222
		2	124
		3	145
		4	209
		5	114
		6	146
		7	72
		8	166
		9	75
		10	223
		11	218
		12	150
		13	123
		14	198
		15	119
		16	255
		17	214
		18	195
	MZsqt-/-;cyc-/- - Animal pole transplants	1	148
		2	163
		3	136
		4	259
		5	204
		6	138
		7	121
		8	134
		9	98
		10	243
		11	171
		12	177
		13	212
		14	289
		15	173
		16	211
		17	246
		18	147
		19	345
	Wild type - Margin transplants	1	137
		2	161
		3	171
		4	212
		5	75
		6	157
		7	111
		8	111
		9	117
		10	155
		11	101
		12	116
		13	299
		14	83
		15	218
		16	140
	MZsqt-/-;cyc-/- - Animal pole transplants	1	105
		2	140
		3	128
		4	223
		5	133
		6	170
		7	200
		8	108
		9	165
		10	87
		11	126
		12	106
		13	99
		14	218
		15	108
		16	132
		17	148
	Figure 6 - figure supplement 2D
	Condition	Embryo	Relative pSmad2/3 intensity
	Wild type	1	0.586986
		2	0.901408
		3	1.08866
		4	1.1721
		5	0.86264
		6	1.50972
		7	0.882606
		8	0.869966
		9	1.26074
		10	0.915914
		11	1.55547
		12	0.913742
		13	0.949378
		14	1.34379
		15	0.970336
		16	0.708224
		17	0.843608
		18	0.664714
	MZsqt-/-;cyc-/-	1	2.08648
		2	2.0114
		3	2.41157
		4	2.92336
		5	1.89404
		6	1.44564
		7	1.26024
		8	1.84322
		9	1.5322
		10	2.04392
		11	1.16684
		12	1.31956
		13	2.0593
		14	1.64196
		15	1.40311
		16	1.69968
		17	2.60288
		18	2.23693
		19	2.38691
	Figure 6 - figure supplement 2E
	Condition	Embryo	Number of pSmad2/3 nuclei
	Wild type	1	6
		2	5
		3	1
		4	2
		5	8
		6	0
		7	0
		8	7
		9	2
		10	1
		11	11
		12	5
		13	0
		14	15
		15	2
		16	1
	MZsqt-/-;cyc-/-	1	8
		2	9
		3	11
		4	1
		5	0
		6	3
		7	23
		8	31
		9	9
		10	5
		11	17
		12	8
		13	6
		14	0
		15	2
		16	1
		17	3
