# Supplementary material for: Regulation of Nodal signaling propagation by receptor interactions and positive feedback
Source: eLife. 2022 Sep 23;11:e66397. doi: 10.7554/eLife.66397 (PMC9612913; doi:10.7554/eLife.66397)
Supplement: Figure 6—source data 1. [file elife-66397-fig6-data1.xlsx]

## Sheet: Figure 6
	Figure 6A
	Nodal	Condition	Embryo	Clerance rate constant (1/s)
	Squint-Dendra2	Wild type	1	0.000113259
			2	9.87e-05
			3	0.000231049
			4	0.000139186
			5	0.000222163
			6	0.000175037
			7	5.55e-05
			8	0.000138914
			9	0.000176154
			10	9.17e-05
			11	0.000146947
			12	0.000182912
			13	0.000229224
			14	0.000143046
			15	0.000177277
			16	0.000149615
			17	0.000105637
			18	0.000200164
			19	0.000206172
		acvr1b-a-/- + 0.4 ng acvr1b-b MO-1	1	0.000137529
			2	0.000231049
			3	0.000152006
			4	0.000202675
			5	0.000148108
			6	0.000202675
			7	0.000128361
			8	0.000175037
			9	0.000160451
		100 pg acvr2b-a mRNA	1	0.000128441
			2	0.000134639
			3	0.000242947
			4	0.000196938
			5	0.000283612
	Cyclops-Dendra2	Wild type	1	9.87389e-05
			2	0.000129803
			3	0.000133329
			4	0.000187181
		acvr1b-a-/- + 0.4 ng acvr1b-b MO-1	1	0.000281767
			2	0.00037266
			3	0.000202675
			4	0.000275058
			5	0.000206294
			6	0.000240676
			7	0.000296217
			8	0.000183372
		100 pg acvr2b-a mRNA	1	0.00017229
			2	0.000239277
			3	0.000129599
			4	0.000114812
			5	0.000184204
			6	0.000251494
			7	0.0001468
			8	0.000184204
	Figure 6B
	Condition	Embryo	D (µm2/s)
	Wild type	1	0.792205
		2	1.34133
		3	1.23423
		4	1.86402
		5	1.85113
		6	3.64192
		7	1.30315
		8	2.37848
		9	2.02209
	50 pg oep mRNA	1	0.878156
		2	0.512984
		3	1.38298
		4	0.719663
		5	0.83379
		6	2.31403
		7	0.952081
		8	0.524498
		9	0.84747
		10	0.697742
		11	0.855959
		12	0.434842
		13	0.798933
		14	0.913118
	acvr1b-a-/- + 0.4 ng acvr1b-b MO-1	1	1.95025
		2	2.71597
		3	2.2122
		4	7.11219
		5	4.0902
		6	2.18872
		7	2.14036
		8	3.15454
		9	3.02482
		10	2.22704
		11	4.12149
	100 pg acvr2b-a mRNA	1	2.77778
		2	0.956421
		3	1.34504
		4	2.28959
		5	1.04237
		6	2.26684
		7	0.1
