# Supplementary material for: Regulation of Nodal signaling propagation by receptor interactions and positive feedback
Source: eLife journal article supplement (doi:10.7554/elife.66397), 2022-09-23
Supplement: supp [file elife-66397-supp-v1.zip]

### A *acvr2a-b* transcript

5' TCGTCGGAGAAGCTGAGGATCGTATCAGGATGTGTTTAAACCCGAGTCCATCATGATTGGGATTTTATGTGTTGATAAACTCGCCAGAGTGA  
TCGATACTGATCGATATTAGCTCATAAGTGTATTGGAGACTGTCCAGCACAGTTTGTCTCTGATTCACTGATGACTGTATTAATGTTTGATTTTC  
ACCTATGCAGACAGAAACACAGGCACTGAGGATTTGTCAAATCTCTCCAACCTAAACCTCTCTTCAGACTTACACATTGATCCGGACCTGTTTG  
CTCACAAATAATGCTTTTGGCAATATTAACCATTAATTTTCGAGGGAGCGGATTATCGGCTTGGGTGTTGCTGGGATTATCGCTGTACAAGAA  
TCTGCACTGAAATGAGGACAGACACAACTGGCCTTGCCATATTCCTCGTCTCTGTTTCATCAGGTGCGATTCTGGGCCGCTCGGAGACACAG  
M R T D T K L A L I F L V S C S S G A I L G R S E T Q  
GAGTGTGTGATTATAATGTGAGCTGGGAGAAGGACGGAACAAACAGGAGCGGCACGGAGTCATGTTATGGAGAAAAGGACAAGCGGCGACACTGT  
E C V Y Y N V S W E K D G T N R S G T E S C Y G E K D K R R H C  
TTCTCCACCTGGAAGAACCCTCGGGGACCATCGAGATGGTCAAGCAGGGCTGCTGGCTGGACGATGTCAACTGCTACGACAGCAGTGAGTGTGTG  
F S T W K N R S G T I E M V K Q G C W L D D V N C Y D S S E C V  
GAGCGCAAAGAGAATATTGATGTCTTCTTCTGCTGCTGCGAGGGAACCTGT 3' →  
E R K E N I D V F F C C C E G N L

Orange: chrUn\_KN150226v1:12087-12345; Green: Start codon; Black: chr6:1724727-1725082; Green: Translation exon 1; Cyan: Translation exon 2; Blue: Translation exon 3; Boxed: Previously predicted start codon (ENSDART00000157415.2, GRCz11)

### B *Acvr1b-a*

MLRDGNVAVMPPRRRTAVALLALCGLLAVGDALKCNCTACESTGYVCETDGACMASTSYINGQEEQVVRICIPRVSLVPPGQPIYCL  
SAKGLLNTHCCYTDFCNSINLQIPNGIADGKGGSWGVPVELVAVIAGPVFLFCLLLIVGVLLFQHHQRNRYNHRQRLDVEDPSCDHLILA  
KDATLQDLNFDLSTSGSGSGLPLFVQRTVARTIVLQEIIGKGRFGEVWRGWRGWDVAVKIFSSREERSWFREAEIYQTIMLRHENIL  
GFIAADNKDNGTWTQLWLVS DYHEHGS LFDYLNHYSVTIEGMIKLSAASGLAHLHMEILGTQGKPGIAHRDLKSKNILVKKNGTC  
AIADLGLAVRHESITDTIDIAPNQRVGTRKRYMAPEVLDETINMKHFDSEFKADIYALGLVYWEIARRCNAGGIHEDYQLPYDLPVSDP  
SIEEMRKVVCDQRLRPNPVNWQSYEALRVMGKIMRECWYANGAARLTALRIKKTLSQLSVQEDIKI

### C *Acvr1b-b*

MDPRQILRILIVLSGLNGVCDALCNCTAPH CERDGF KCETNGACVASTSVIEGQEQHVRLCIHKEKLVPPGQPFYCLSAEGLMNTH  
CCYTDYCN SIDRLPIVTNGPGAGQDWGPVELTAVVAGPVFVLCVLVLLGLFLFQHHQRAYGHRQRLEVEDPSTEHMFLAKDKTLQ  
DLIYDLSTSGSGSGLPLFVQRTVARTIVLQEIIGKGRFGEVWRGWRGWDVAVKIFSSREERSWFREAEIYQTIMLRHENILGFIAAD  
NKDNGTWTQLWLVS DYHENGSLFDYLNRYSVTIEGMIKLSAASGLAHLHMEILGTQGKPGIAHRDLKSKNILVKKNGTC  
AVRHESITDTIDIAPNQRVGTRKRYMAPEVLDESINMRHFDSEFKADIYALGLVYWEIARRCNAGGIHEDYQLPYDLPVSDP  
SIEEMRKVVCDQRLRPNPVNWQSYEALRVMGKIMRECWYANGAARLTALRIKKTLSQLSVQEDIKI

### D *Acvr1c*

MSHPRCSDAALFIFTFVQLTAALKCVCHLCVNHTCETEAEAGACWNSVMLINGKEETVKSCVSPSELKGQVFCYSSRNVSKRNCFF  
TDFCNNE TLHLNPEQPPEDSGWSQLEVAAVILVPSCLVCGVMLGVCAIQNLRC THIKSLKQDPPEPLDDPTLVSPDKCLKELIYDM  
STSGSGSGLPLLVQRTIARTIVLQEIIGKGRFGEVWRGWRGWDVAVKIFSSRDERSWFREAEIYQTIMLRHDNILGFIAADNKDNGS  
WTQLWLVS DYHEHGS LFDYLNRYSVTIEGMIKLSAASGLAHLHMEILGTQGKPAIAHRDLKSKNILVKKNGA AVIADLGLAVKHDSNT  
NTIDIPINHRVGTRKRYMAPEILDD SINMSSFESFKRADIYSLVFWELARRCSIQGIHEDFQLPYDQVQSDPSLDDMRVVEQKL  
RPNIPNQWQSEALRVMGKIMRECWHANPAARLTALRVKKTISQVTWVKDVKE

### E *Acvr2a-a*

MGPATKLAFGVFLISCSGAILGRSETQECVFYNNPSLENRGNRS GIEPCVGD KDKRLHCFATWRNVSGTVEIVKQGCWLDDVN  
CYDSTECVEKKEDPDVFFCCCEGNMCNEKFYNPNTAPVQTTSNPLTQKPLPFSTLLYSIVPIMGIAAIVLLSFWMYRHHKLAYPPVL  
VPTADPGPMPPSPPTLVQKPLQLEIKARGFRGCVWKAQLLNDYVAVKIFPIQDKLSWQNEIYDINIPGMRHENILQFIAEKRGSNL  
DIELWLITAYHEKSSLDYLVKANNVSWNELCLIAQTFRGLAYLHEDIPNLKDGHKPAIAHRDFKSKNVLLKNTLACIADFGALALKE  
AGKSAGDTHGQVGTTRYMAPEVLEGAINFQRDAFLRIDMYAVGLVLWELAACTASDGPVDEYMLPFEEEEVGQHPTELDQMDEVV  
HKKLRPTLRECWQKHPGLAMLCETIEECWDHEAEARLSAGCVEERIVQMQRQTSVSAPEEIVTVMTVNDVYPKESSL

### F *Acvr2a-b*

MRTDTKLALAIFLVSCSSGAILGRSETQECVYNNVSWEKDGTNRSGTESCYGEKDKRRHCFSTWKNRSGTIEMVKQGCWLDDVN  
CYDSSECKVERKENIDVFFCCCEGNLCNQKFHYNPETVEPTLNPVPPKPDLPFTLLYSLLPIMAVAVILFISFWMYRHLKLTYPPLVPS  
QDPGLTPPSPPLGQKPLQLELKARGFRGCVWKAQLLSEAVAVKIFPVQNKQSWQNEIYDINIPGMRHENILQFIAEKRGNGVDI  
ELWLITTYHEKSSLDYLVKANNVSWNELCLIAQTFRGLAYLHEDIPNLKDGHKPAIAHRDFKSKNVLLKNTLACIADFGALALKE  
STGDTHTGQVGTTRYMAPEVLEGAINFQRDAFLRIDMYAVGLVLWELAACTASDGPVDEYMLPFEEEEVGQHPTELDQMDEVV  
RPIFREHWLKHGSLLCETMEECWDHEAEARLSAGCVEERIISMQRSTSIISPDDILSVMTVNDVYPKESSL

### G *Acvr2b-a*

MFASLLTLALLLATFAADPSHGEVETRECLYNNVNWVEVEKTNRS GVERCEGEKDKRSHCYASWRNNSGSIQLVKKGWLD DFN  
YDRQECVATEENPVFFCCCEGNFCNERFTHLPDISGPVISPPPVSPLLNVLYSLLPLSMLSMAVLLAFWMYRHRKPPYGHVDV  
NEDPGPSPSPPLVGLKPLQLELVKARGFRGCVWKAQMINYVAVKIFPIQDKLSWQNEREMFSTPGMKHDNLLRFIAAEKRGSNLE  
MEFWLITEFHGSLTDYLVKANNVSWNELCLIAQTFRGLAYLHEDIPNLKDGHKPAIAHRDFKSKNVLLKNTLACIADFGALALKE  
FEPGKPPGDTHTGQVGTTRYMAPEVLEGAINFQRDSFLRIDMYAMGLVLWELVSRCKAADGPVDEYMLPFEEEEVGQHPTELDQMDEVV  
VWHKKLRPAFKDCWLKHSGLCQMCETMEECWDHDAEARLSAGCVERISQIRRVSSSTSDCLFSMVTSLTNVDLPKESSL

### H *Acvr2b-b*

MFVPWLAFALVWCTGVSHA EVATRECVYNNVNDWRTEKTNQSGFERCEGEKDKRLHCYASWLNSTGTIRLVKKGWLD DFN  
RQECVATEESPVFFCCCEGNFCNEKFTHLPEAIAPAVKIQQPGPSLFGILVYSLLPLAILSLALVLACWTYHQRKPPYRHVDIGQ  
DAGLPPSPPLVGLKPLQLELVKARGFRGCVWKAQLLSEYVAVKIFPIQDKLSWQNERDIYLTGFKHENILHYISAEKRGNTLMEL  
WLVTETFERGSLTDYLVKANNVSWPQLCHISASMSRGLAYLHEDIPYRAEGPKPAIAHRDFKSKNVLLKMDLTAVIADFGLA VRFEPG  
KPPGDTHTGQVGTTRYMAPEVLEGAINFQRDSFLRIDMYALGLVLWELVSRCTASDGPVGEYQLPFEEEEVGQHPTELDQMDEVV  
KMRPVFKDCWVKHQLSGLCETIEECWDHDAEARLSAGCVERISTISKSNNTLNTSTSECLLSMLTSHSDTLPPKDSST

Bold: Signal peptide; Red: Activin receptor domain; Underlined: Transmembrane domain; Blue: GS domain; Italics: Protein kinase domain

Figure 1 – figure supplement 1
