# Supplementary material for: Regulation of Nodal signaling propagation by receptor interactions and positive feedback
Source: eLife journal article supplement (doi:10.7554/elife.66397), 2022-09-23
Supplement: supp [file Figure3_figure-supplement2_source-data1.xlsx]

## Sheet: Figure 3 - figure supplement 2
	Figure 3 - figure supplement 2B
			Phenotype
	Condition	Morpholino (mg/ml)	Wild type	Pointy nose	Pinhead	Dead
	Uninjected	0	19	0	0	0
	acvr1b-a MO + acvr1b-b MO	0.4	15	2	0	1
		2	0	0	16	2
		4	0	0	17	0
	Figure 3 - figure supplement 2C
			Phenotype
	Condition	Morpholino (mg/ml)	Wild type	Brain necrosis	Brain necrosis + tail malformation	Head necrosis + tail malformation	Head + tail malformation	Smaller eye	Zygotic oep	Necrotic oep like	Dead
	Uninjected	0	45	0	0	0	0	0	0	0	5
	acvr1b-a-/- + acvr1b-b MO-1	0	19	9	0	2	0	2	0	0	2
	acvr1b-a-/- + acvr1b-b MO-1	0.4	0	0	0	0	0	0	10	0	3
	acvr1b-a-/- + acvr1b-b MO-1	2	0	0	0	0	0	0	0	6	2
	acvr1b-a-/- + acvr1b-b MO-1	4	0	0	0	0	0	0	0	5	6
	acvr1b-a-/- + acvr1b-b MO-2	0.4	9	1	0	0	2	0	0	0	2
	acvr1b-a-/- + acvr1b-b MO-2	2	0	8	5	0	0	0	0	0	5
	acvr1b-a-/- + acvr1b-b MO-2	4	0	0	0	0	0	0	0	0	15
