# Supplementary figures and images for: Regulation of Nodal signaling propagation by receptor interactions and positive feedback
Source: eLife journal article supplement (doi:10.7554/elife.66397), 2022-09-23

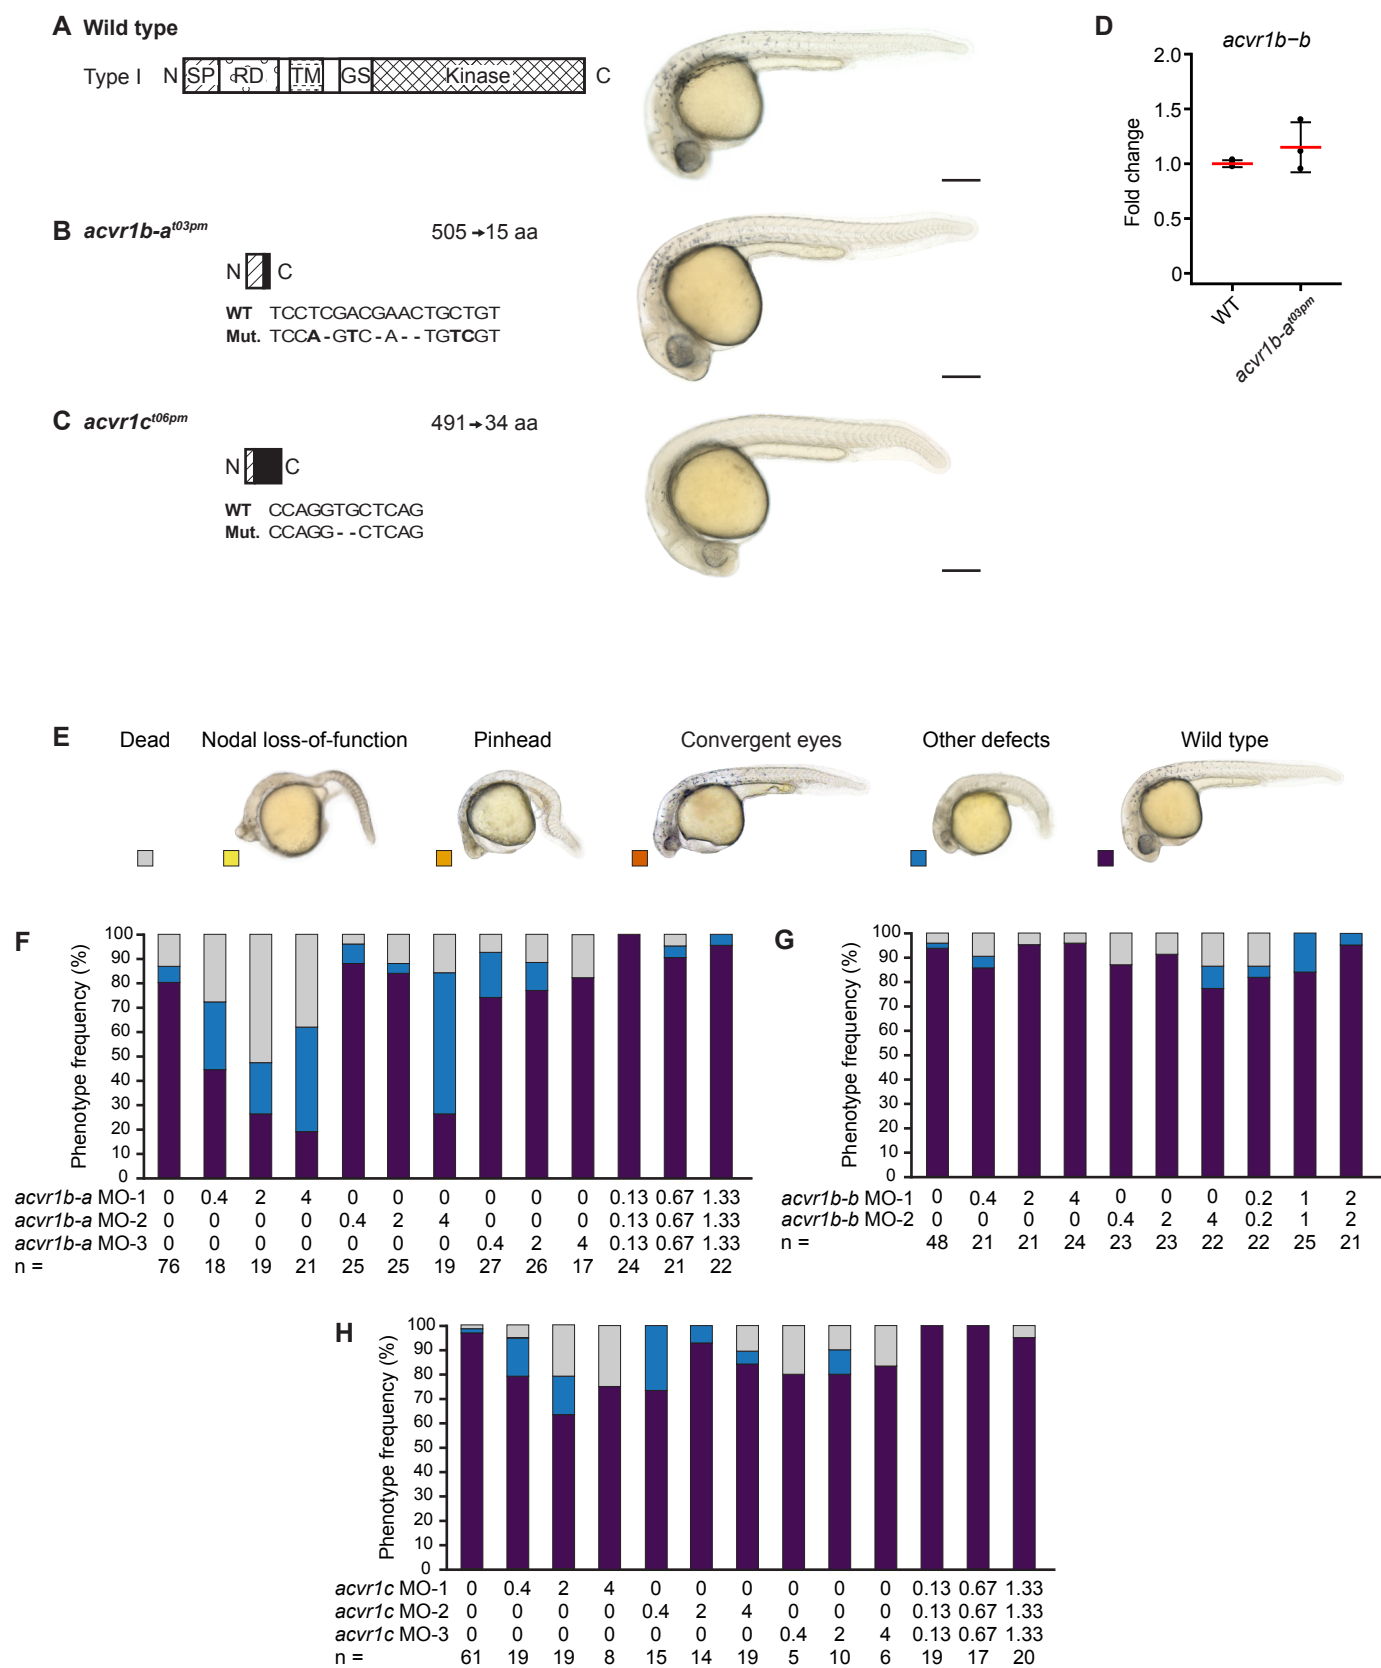

Figure 3 – figure supplement 1

Supplement: supp [file elife-66397-supp-v1.zip]

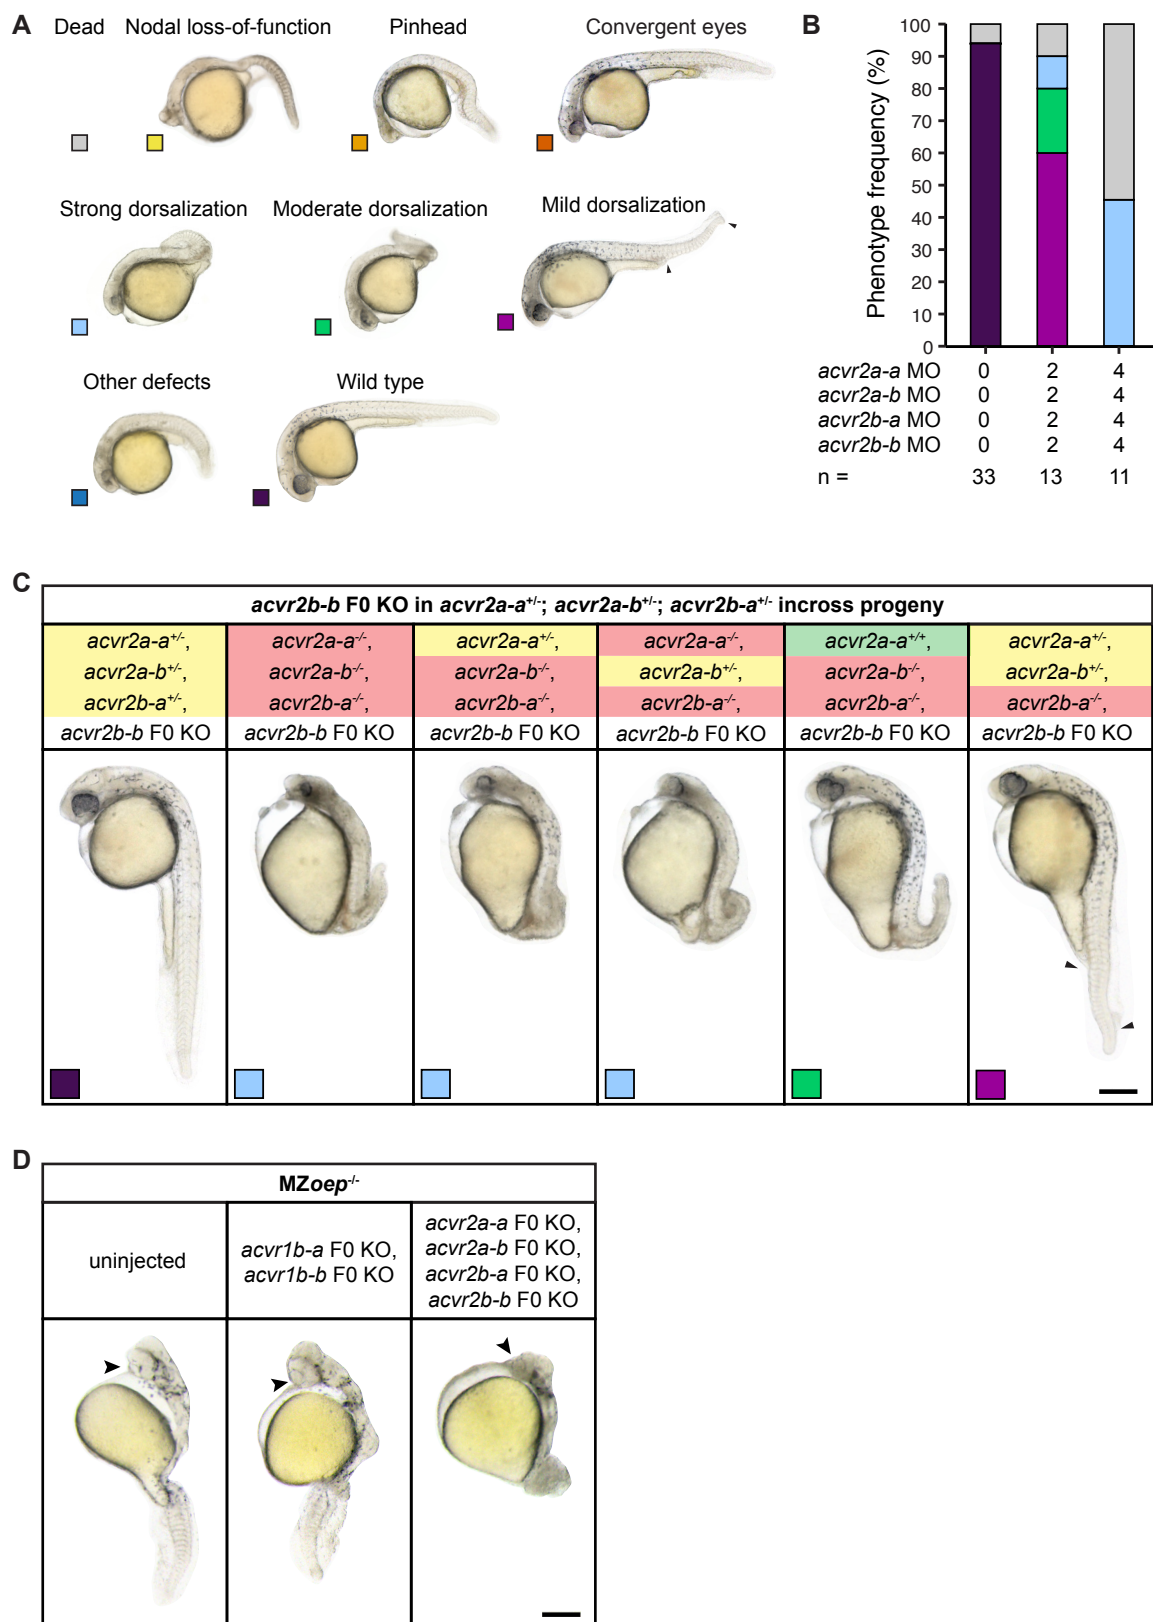

Figure 2 – figure supplement 2

Supplement: supp [file elife-66397-supp-v1.zip]

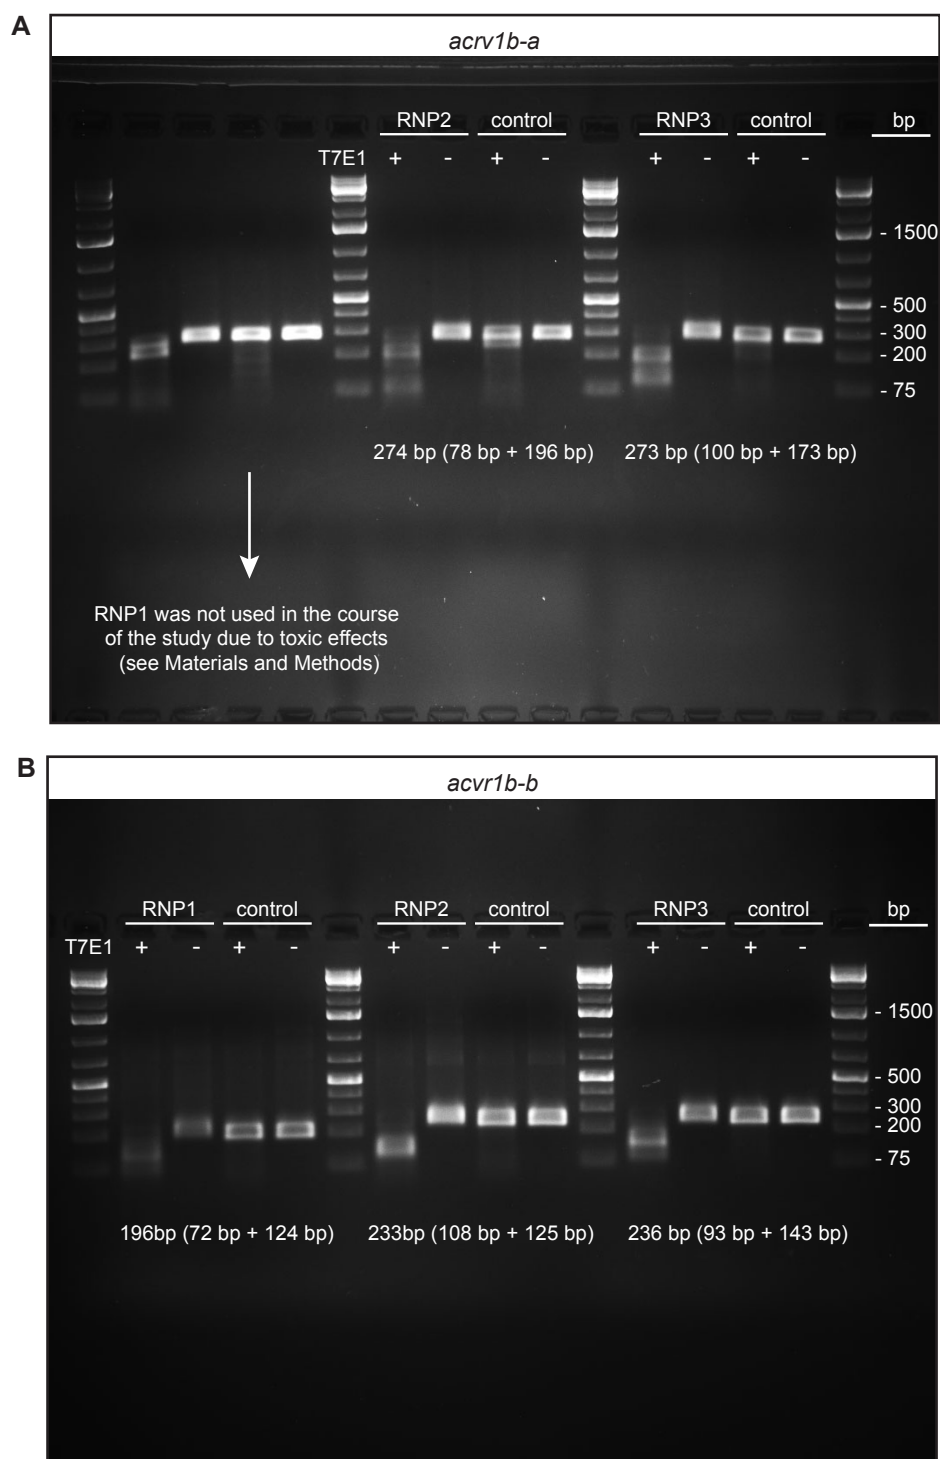

Figure 3 – figure supplement 3 – source data 1

Supplement: supp [file elife-66397-supp-v1.zip]

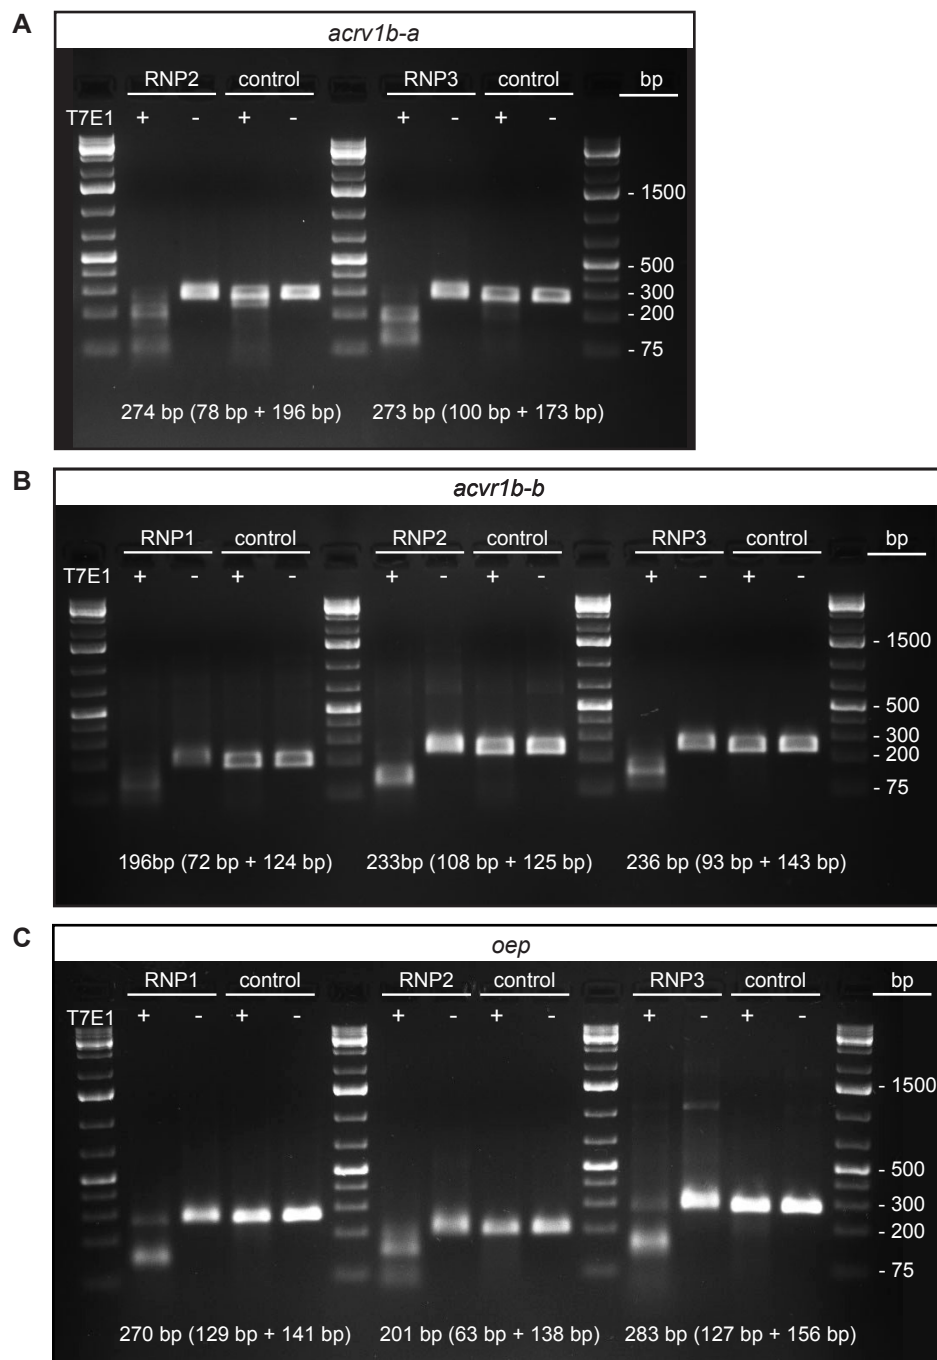

Figure 3 – figure supplement 3

Supplement: supp [file elife-66397-supp-v1.zip]

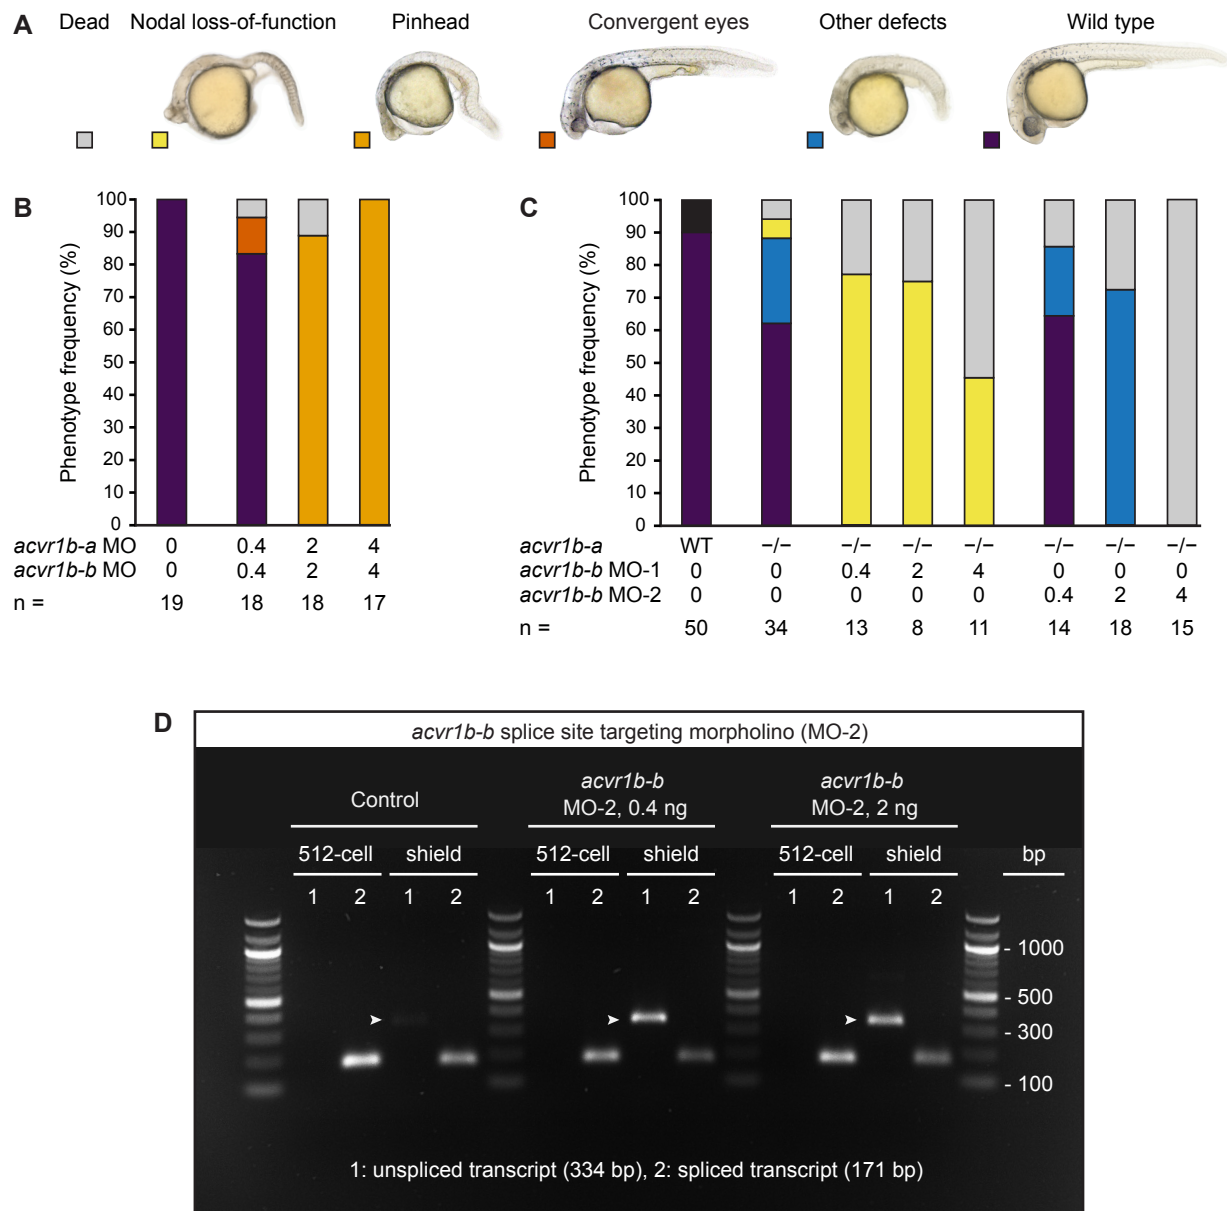

Figure 3 – figure supplement 2

Supplement: supp [file elife-66397-supp-v1.zip]

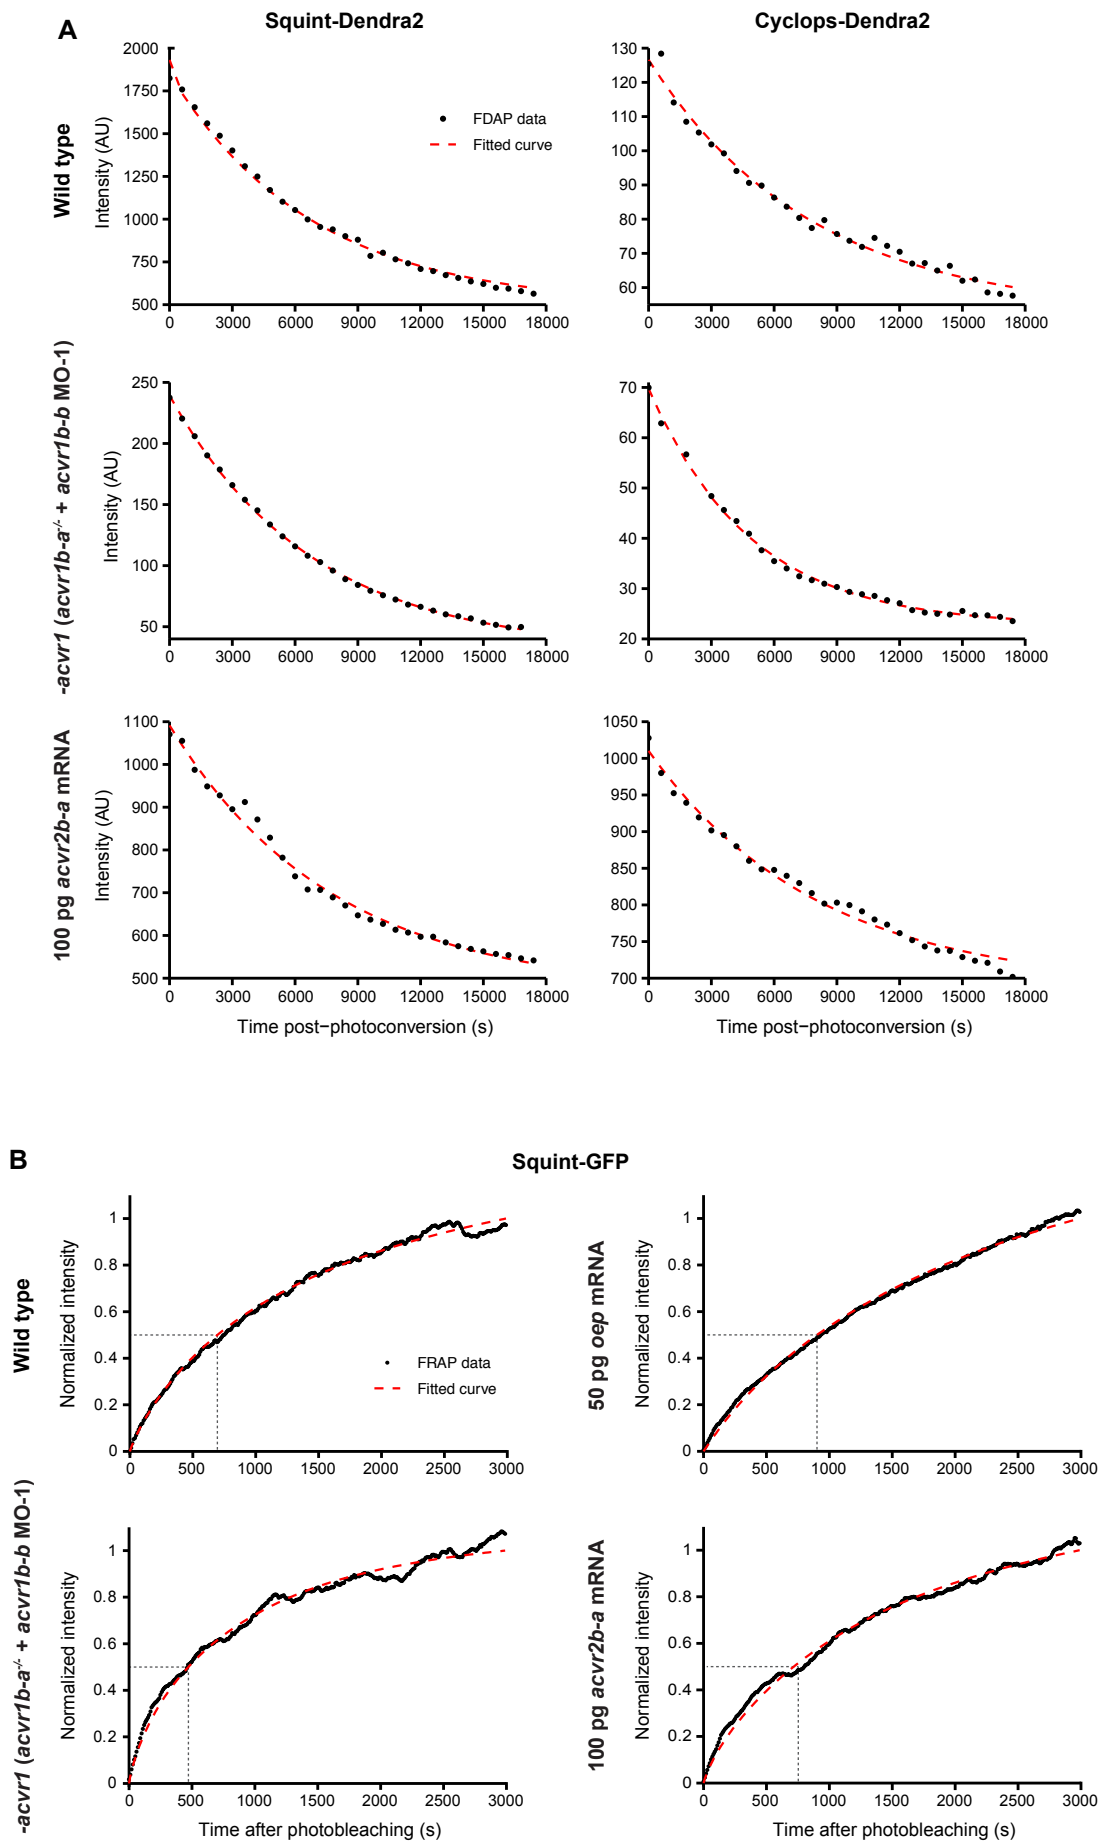

Figure 6 – figure supplement 1

Supplement: supp [file elife-66397-supp-v1.zip]

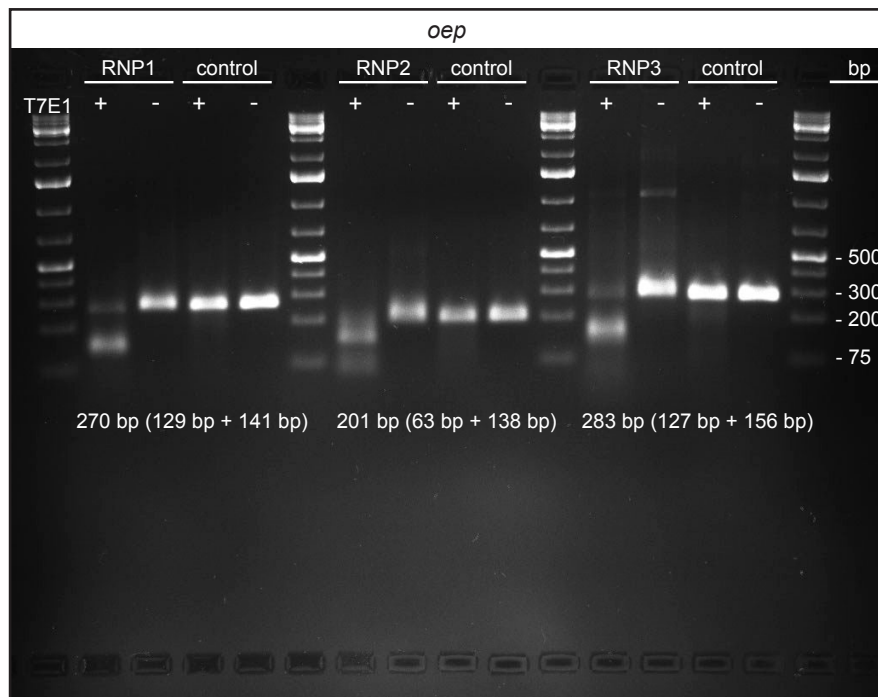

Figure 3 – figure supplement 3 – source data 2

Supplement: supp [file elife-66397-supp-v1.zip]

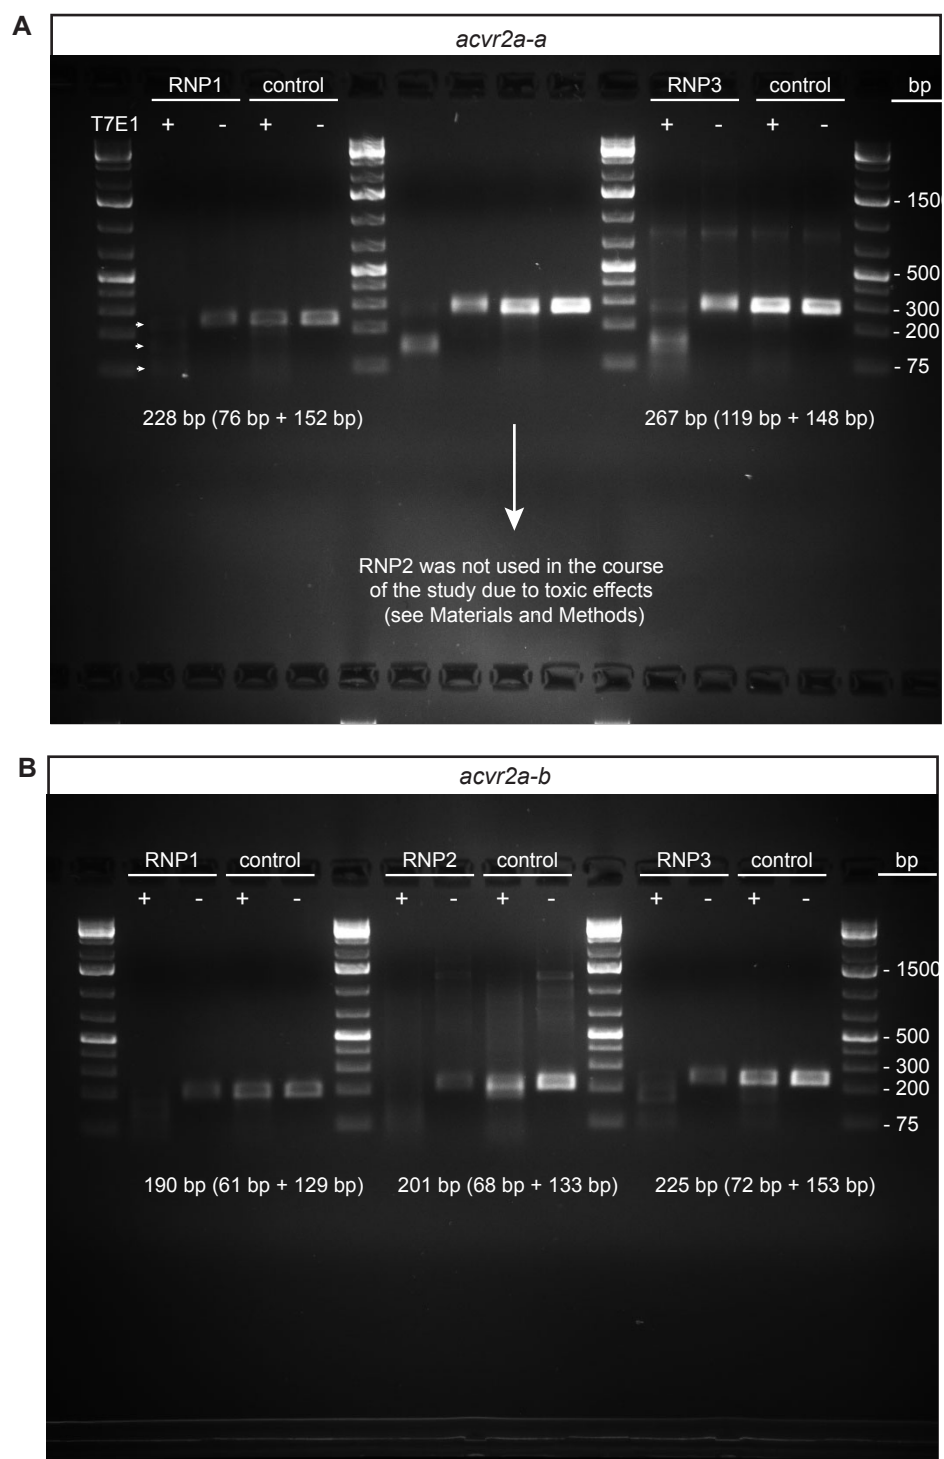

Figure 2 – figure supplement 3 – source data 1

Supplement: supp [file elife-66397-supp-v1.zip]

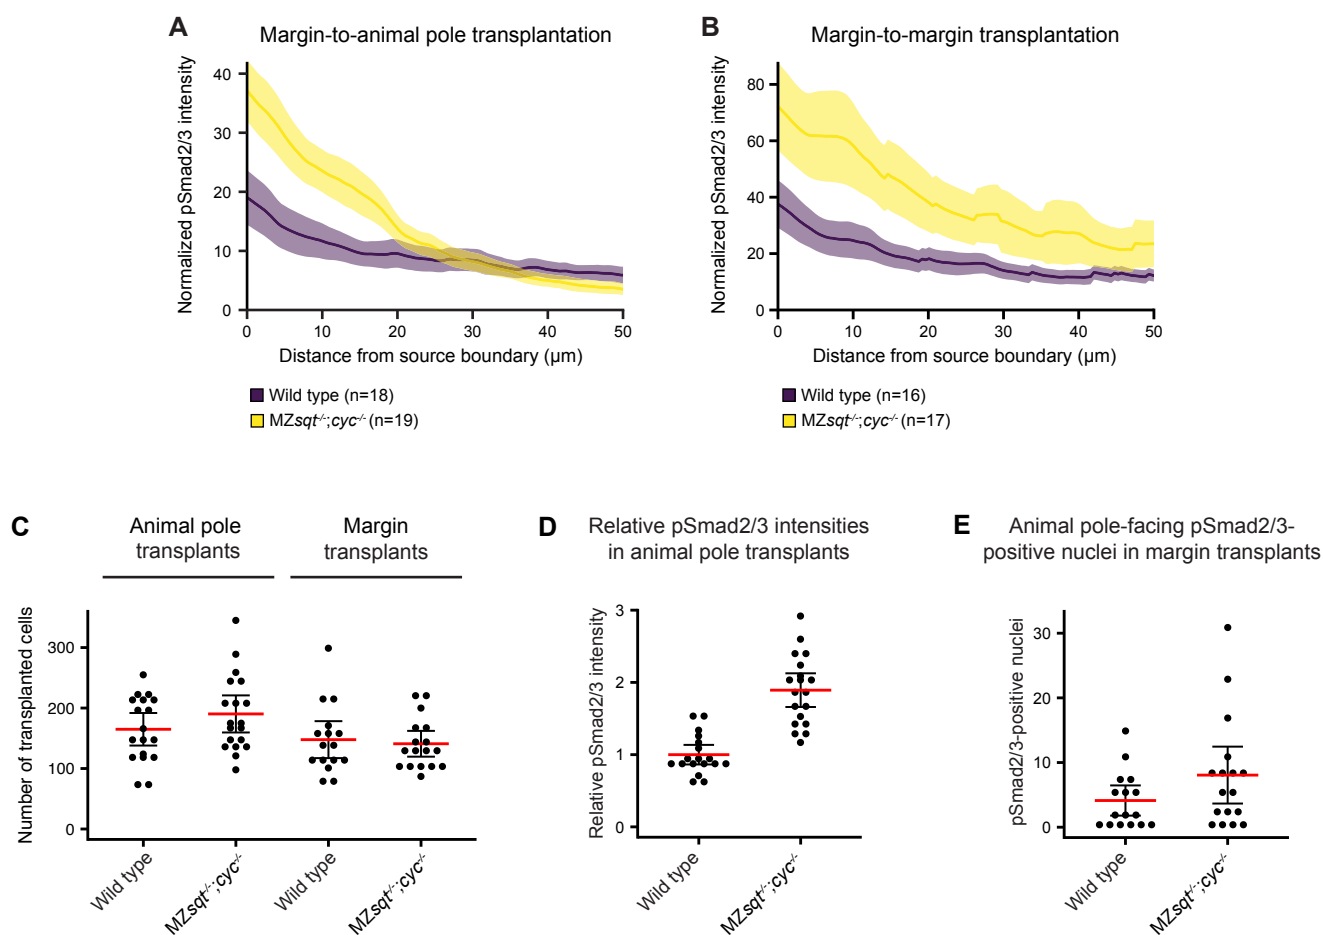

Figure 6 – figure supplement 2

Supplement: supp [file elife-66397-supp-v1.zip]

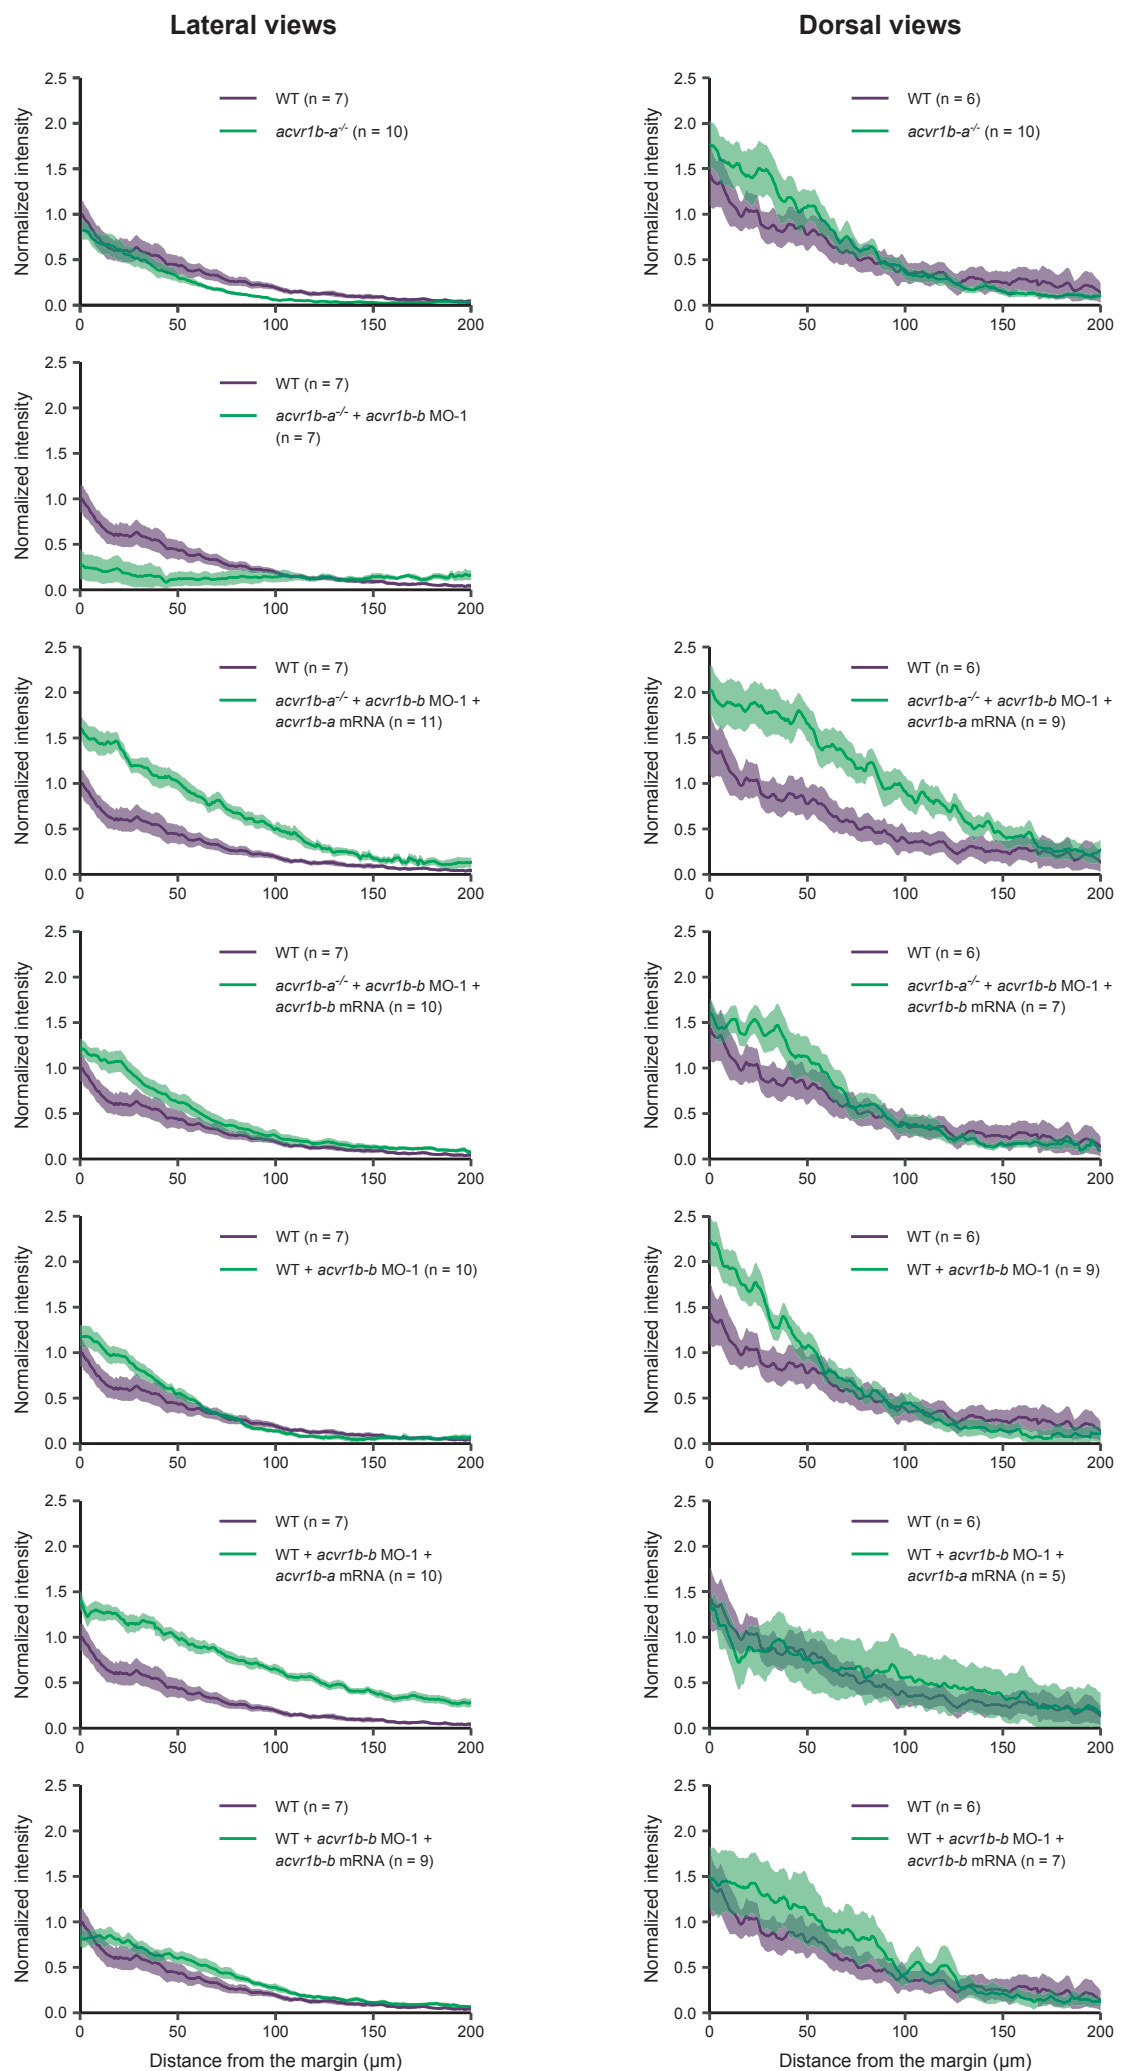

Figure 4 – figure supplement 1

Supplement: supp [file elife-66397-supp-v1.zip]

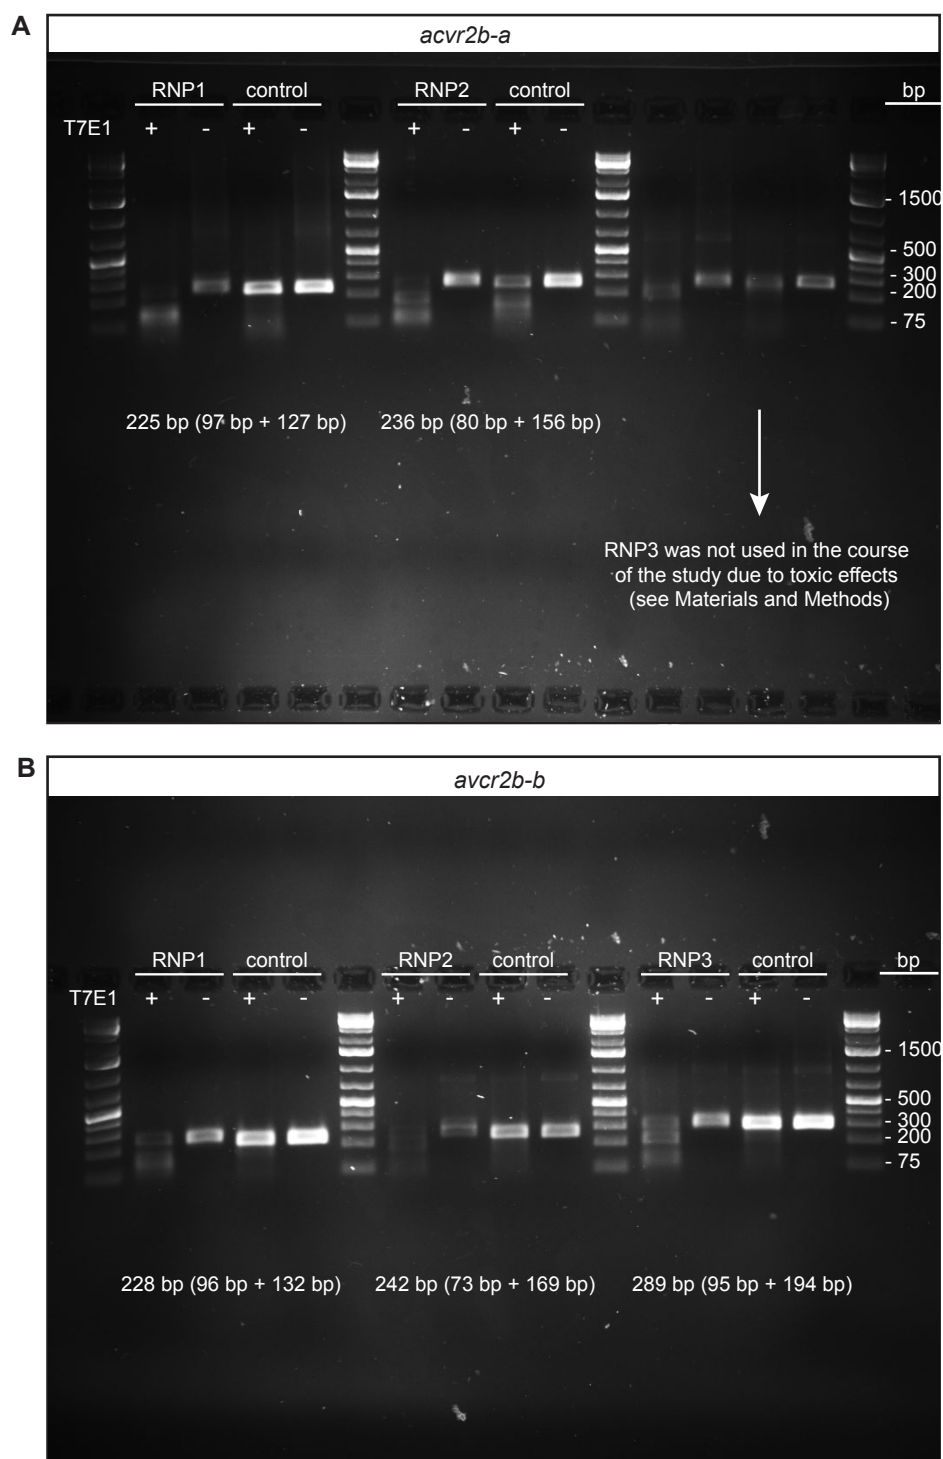

Figure 2 – figure supplement 3 – source data 2

Supplement: supp [file elife-66397-supp-v1.zip]

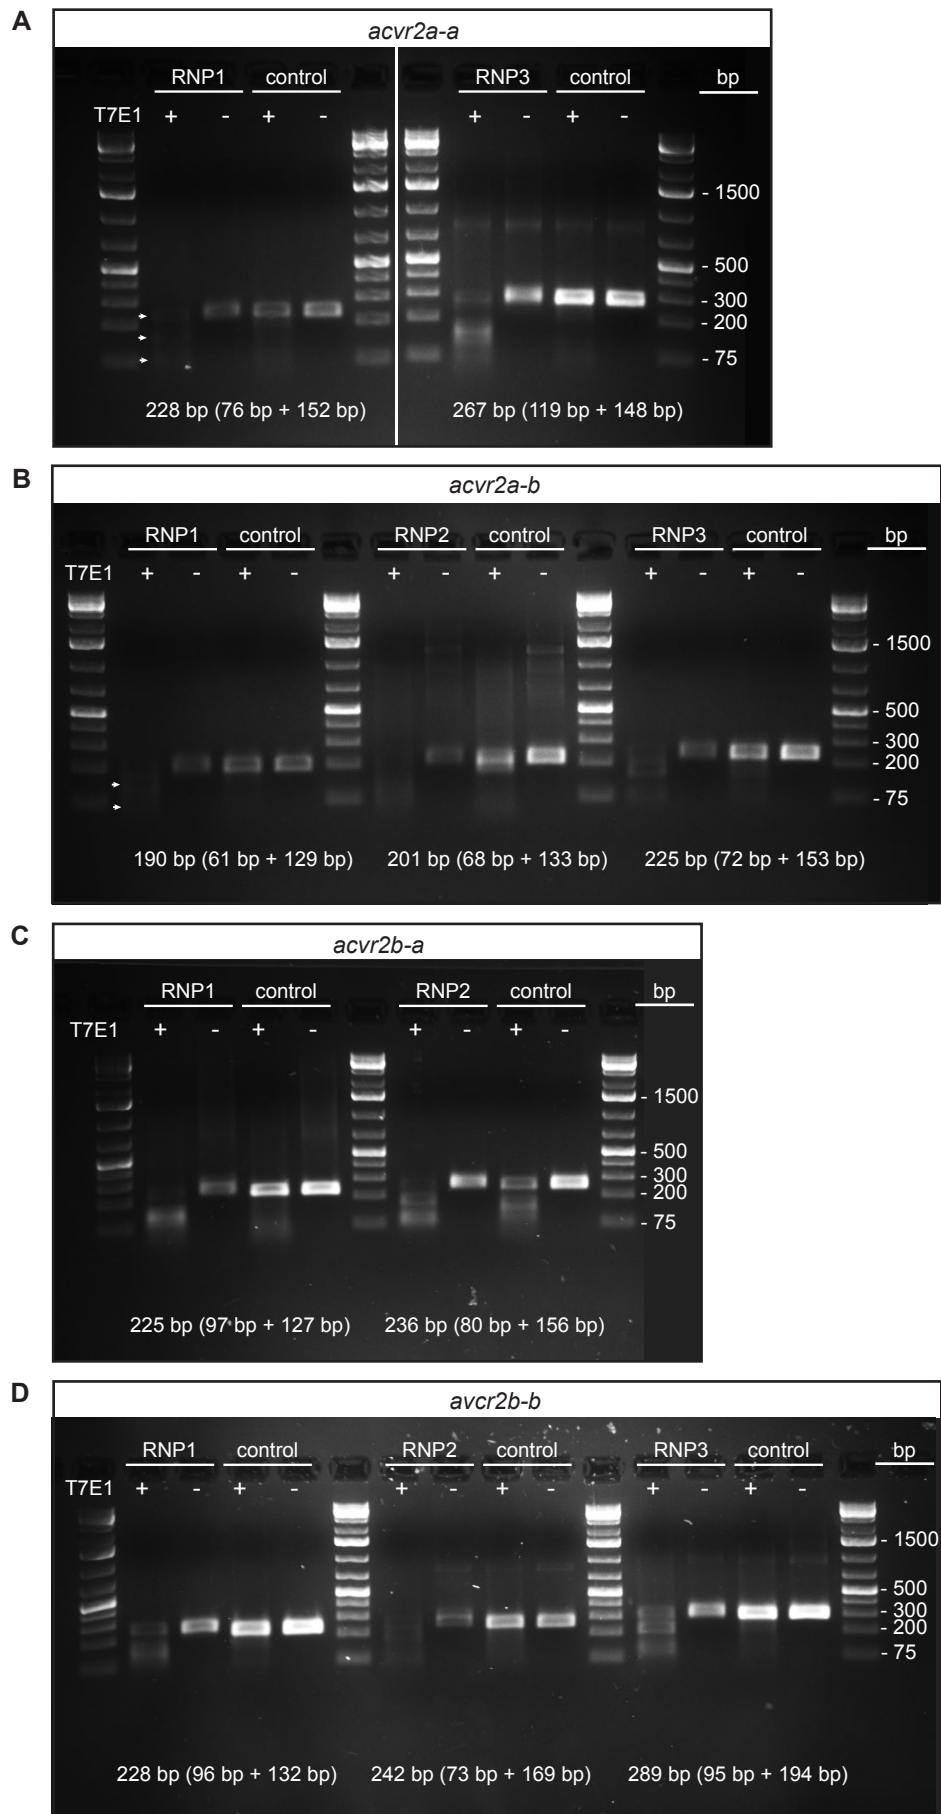

Figure 2 – figure supplement 3

Supplement: supp [file elife-66397-supp-v1.zip]

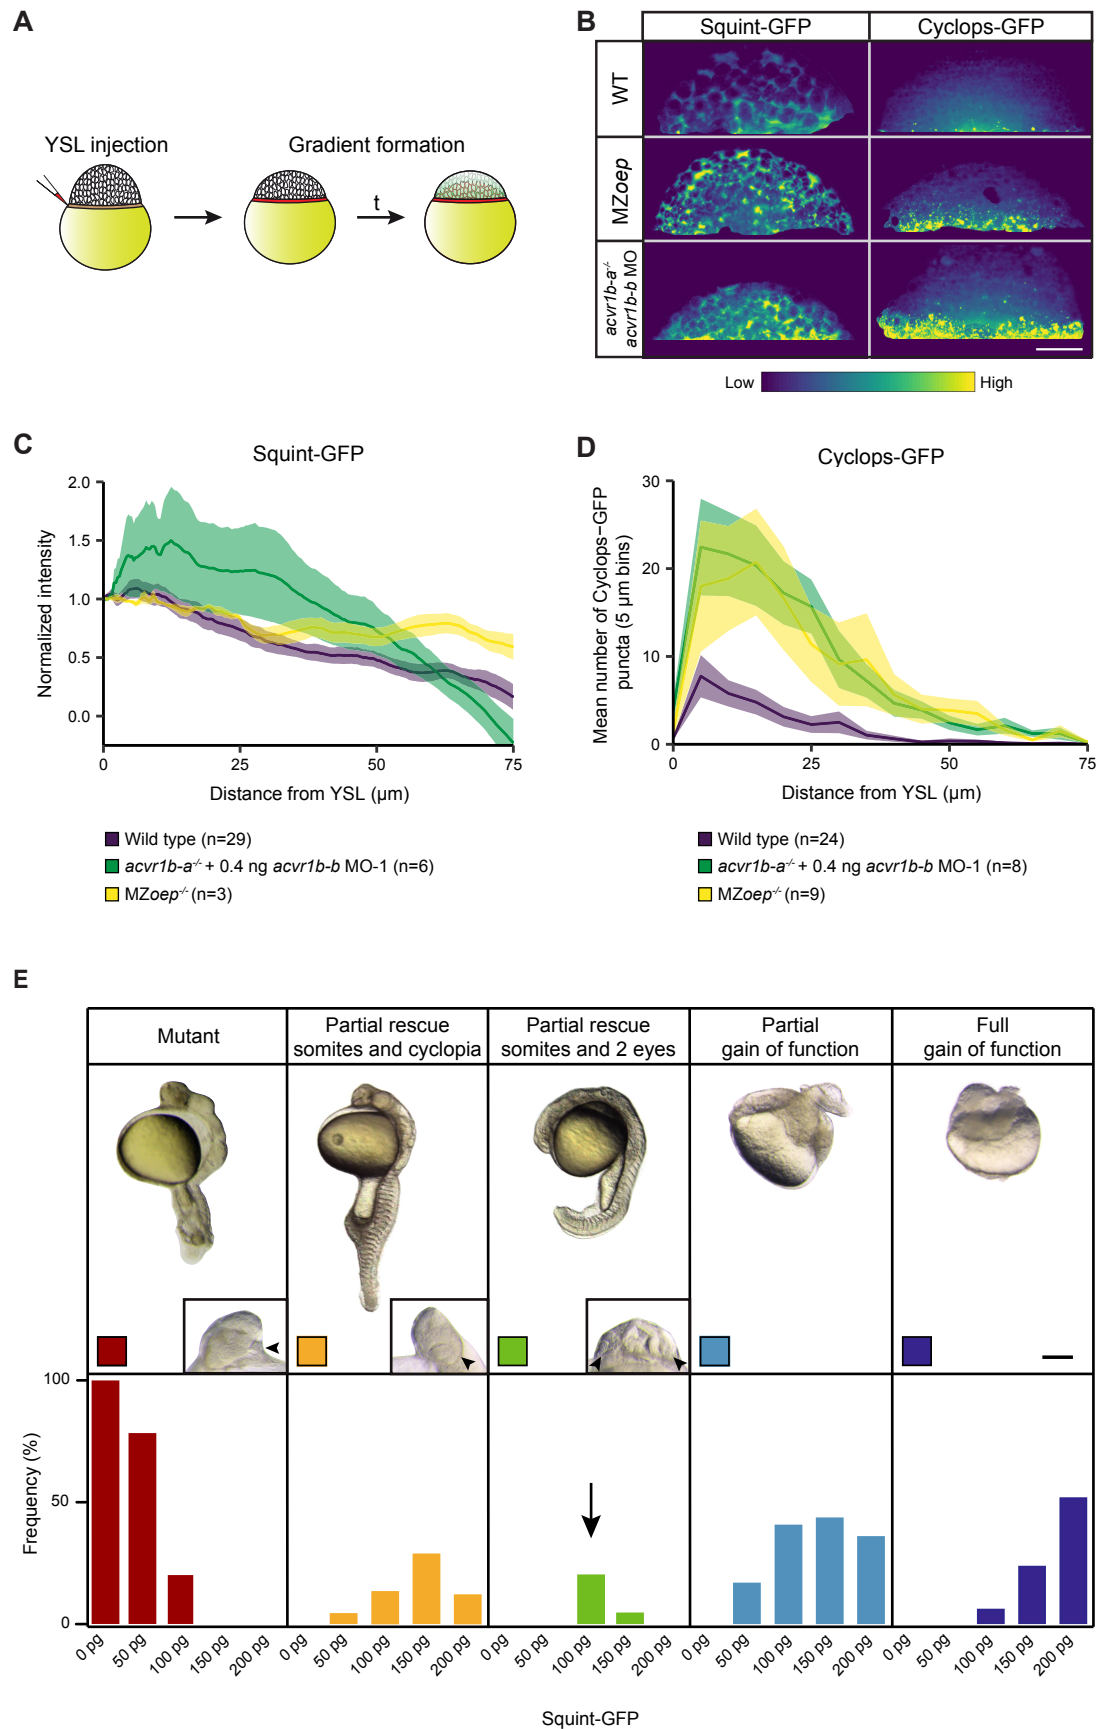

Figure 5 – figure supplement 1

Supplement: supp [file elife-66397-supp-v1.zip]

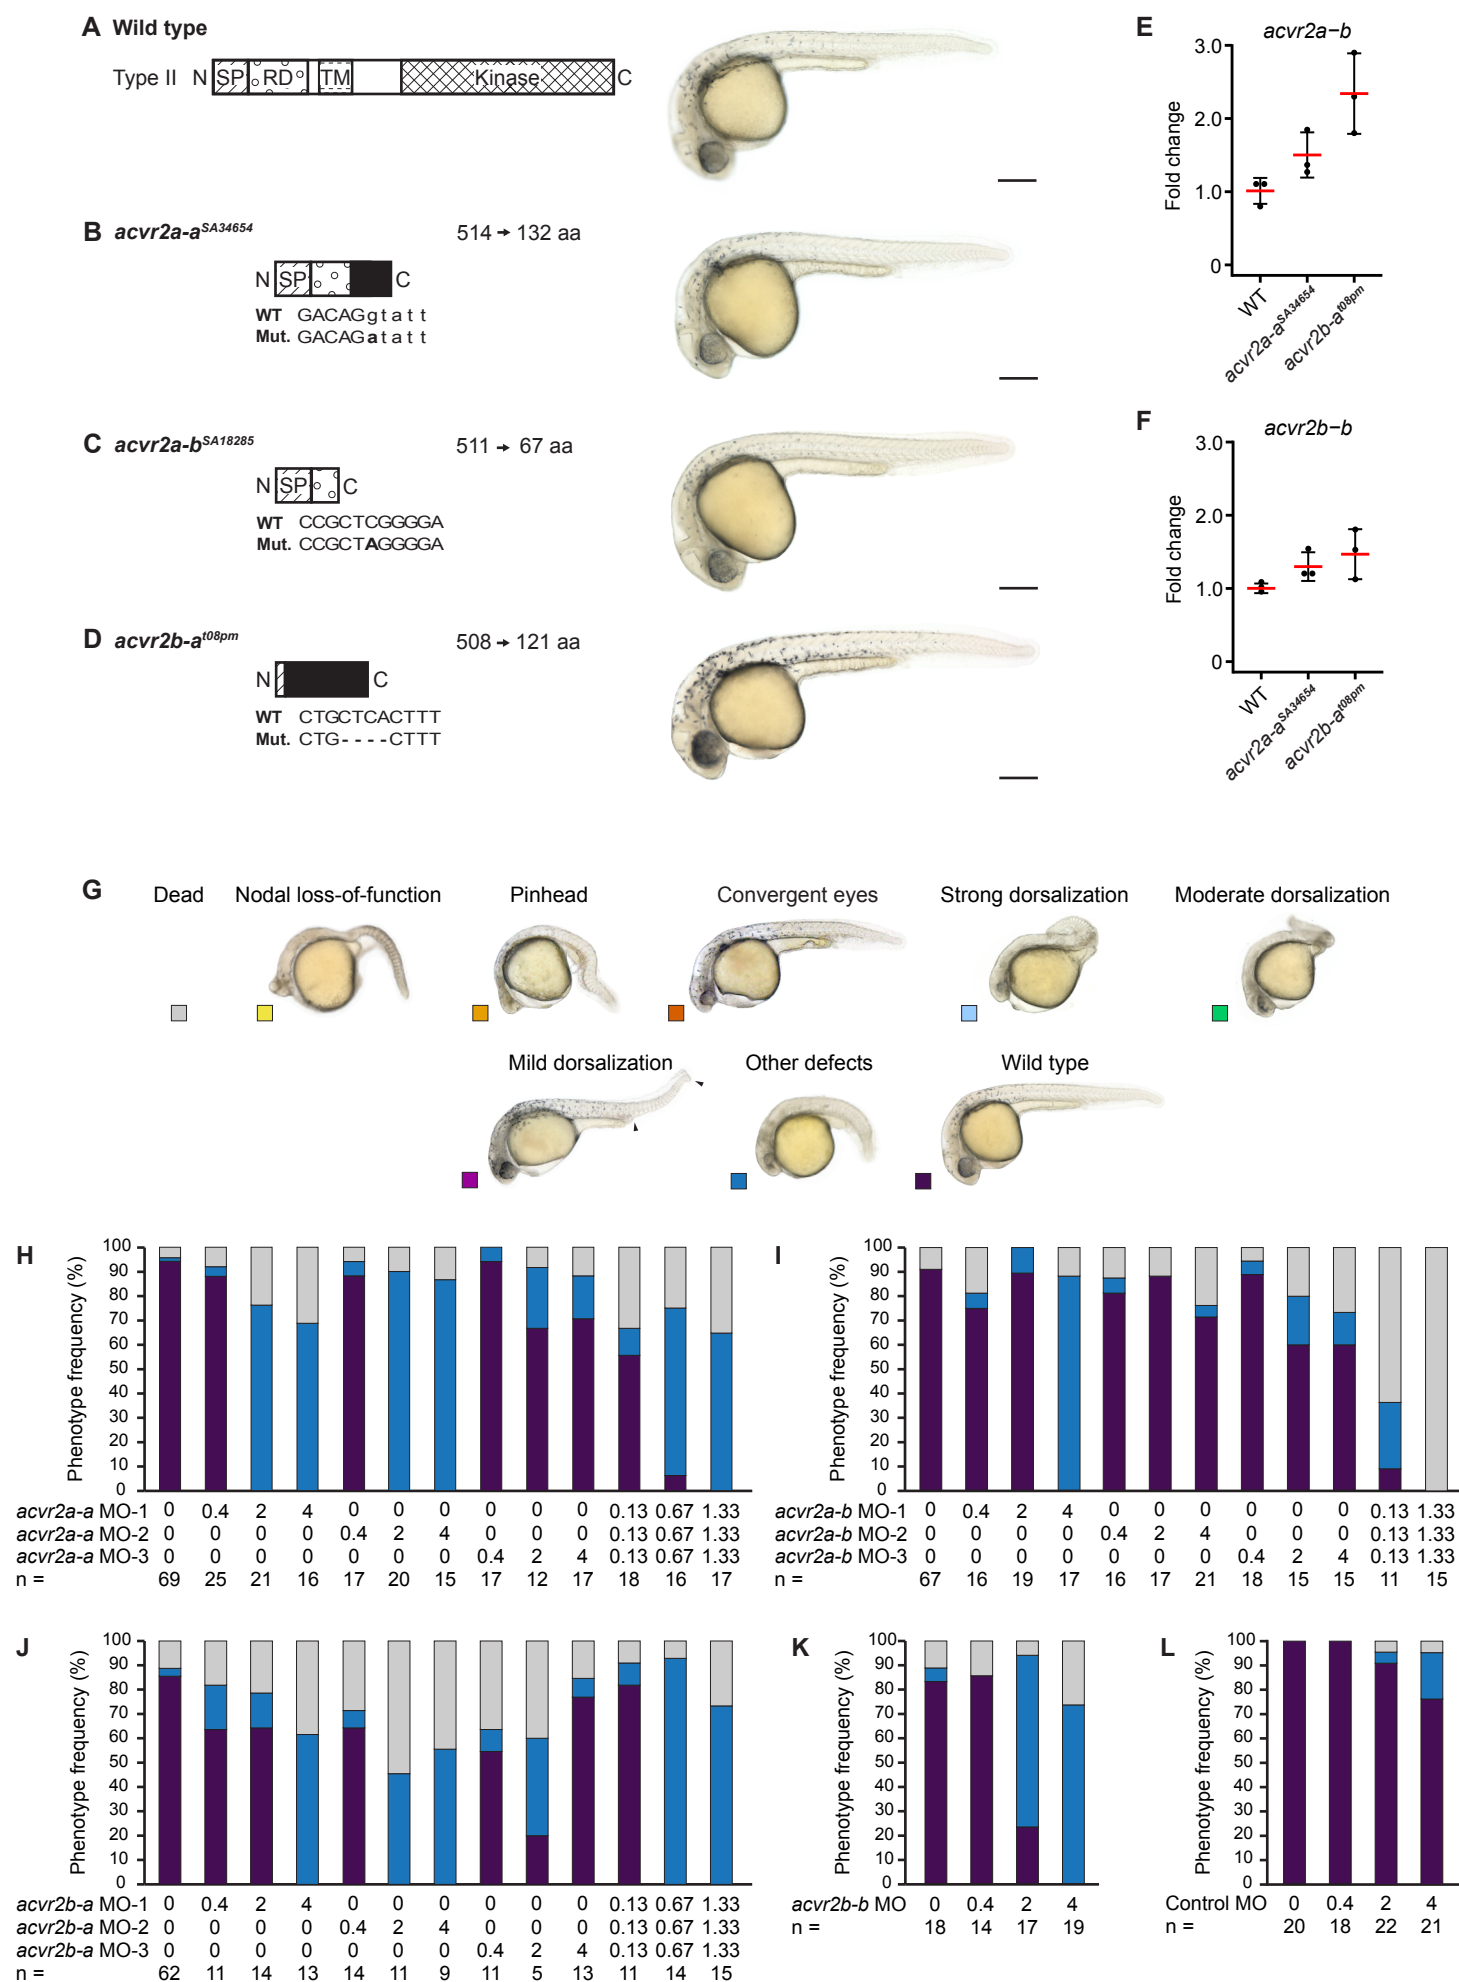

Figure 2 – figure supplement 1

Supplement: supp [file elife-66397-supp-v1.zip]
